# Supplementary material for: Therapeutic targeting of SETD2-deficient cancer cells with the small-molecule compound RITA
Source: bioRxiv preprint, doi:10.1101/2021.07.08.451582, version 1 (2021-07-09)
Supplement: Supplementary Table 1 [file 451582_file02.xlsx]

## Sheet: ODL Library
No.	Plate No.	384 well - Row Column	384 well - Row	384 well - Column	Label Name	Small Compound name	Target/Mechanism	Ref No.	SUPPLIER	Solvent Used	MW (Da)	Concentration (mM)	Volume (uL)	SmCo/DMSO Long Time Storage T°C	Label Name	Chemical Formula	Chemical Name	Structure	SMILES
1	Oncology Drugs Library_10mM	A03	A	03	F00001	Galiellalactone	Stat3	sc-202165-2	Santa Cruz Biotechnology	100% DMSO	194.23	10	25	-20°C	Galiellalactone	C11H14O3	(4R,5aS,7aS,7bR)-5,5a,6,7,7a,7b-hexahydro-7b-hydroxy-4-methyl-indeno[1,7-bc]furan-2(4H)-one	C11H14O3	O=C1C2=C[C@H](C)C[C@]3([H])CC[C@]([C@]23O)([H])O1
2	Oncology Drugs Library_10mM	A04	A	04	F00081	SR1 HCl	aryl hydrocarbon receptor	CT-SR1	ChemieTek	100% DMSO	429.542	10	25	-20°C	SR1 HCl	C24H23N5OS	4-​[2-​[[2-​benzo[b]thien-​3-​yl-​9-​(1-​methylethyl)-​9H-​purin-​6-​yl]amino]ethyl]-​phenol	C24H23N5OS	OC1=CC=C(CCNC2=C3N=CN(C(C)C)C3=NC(C4=CSC5=CC=CC=C54)=N2)C=C1
3	Oncology Drugs Library_10mM	A05	A	05	F00009	VER 155008	HSP70	Axon 1608	Axon Medchem	100% DMSO	556.404	10	25	-20°C	VER 155008	C25H23Cl2N7O4	5'-O-[(4-Cyanophenyl)methyl]-8-[[(3,4-dichlorophenyl)methyl]amino]-adenosine	C25H23Cl2N7O4	O[C@@H]([C@H]([C@H](N1C(NCC2=CC=C(Cl)C(Cl)=C2)=NC3=C(N=CN=C31)N)O4)O)[C@H]4COCC5=CC=C(C#N)C=C5
4	Oncology Drugs Library_10mM	A06	A	06	F00092	BAY 73-4506_Regorafenib	multiple tyrosine kinases (e.g. VEGFR2-TIE2)	S1178	Selleck	100% DMSO	482.82	10	25	-20°C	BAY 73-4506	C21H15ClF4N4O3	1-(4-chloro-3-(trifluoromethyl)phenyl)-3-(2-fluoro-4-(2-(methylcarbamoyl)pyridin-4-yloxy)phenyl)urea	C21H15ClF4N4O3	O=C(NC1=CC=C(OC2=CC(C(NC)=O)=NC=C2)C=C1F)NC3=CC=C(Cl)C(C(F)(F)F)=C3
5	Oncology Drugs Library_10mM	A07	A	07	F00017	RDEA119_Refametinib	MEK1/2	CT-R119	ChemieTek	100% DMSO	572.338	10	25	-20°C	RDEA119	C19H20F3IN2O5S	N-(3,4-difluoro-2-(2-fluoro-4-iodophenylamino)-6-methoxyphenyl)-1-(2,3-dihydroxypropyl)cyclopropane-1-sulfonamide	C19H20F3IN2O5S	O=S(C1(CC(O)CO)CC1)(NC2=C(OC)C=C(F)C(F)=C2NC3=CC=C(I)C=C3F)=O
6	Oncology Drugs Library_10mM	A08	A	08	F00100	Brivanib	VEGFR1, VEGFR2, FGFR1	S1084	Selleck	100% DMSO	441.463	10	25	-20°C	Brivanib	C22H24FN5O4	(S)-(R)-1-((4-((4-fluoro-2-methyl-1H-indol-5-yl)oxy)-5-methylpyrrolo[2,1-f][1,2,4]triazin-6-yl)oxy)propan-2-yl 2-aminopropanoate	C22H24FN5O4	C[C@@H](N)C(O[C@@H](C)COC1=CN2N=CN=C(OC3=C(F)C4=C(NC(C)=C4)C=C3)C2=C1C)=O
7	Oncology Drugs Library_10mM	A09	A	09	F00025	GSK2126458	PI3K, mTORC1, mTORC2	S2658	Selleck	100% DMSO	505.5	10	25	-20°C	GSK2126458	C25H17F2N5O3S	2,4-difluoro-N-(2-methoxy-5-(4-(pyridazin-4-yl)quinolin-6-yl)pyridin-3-yl)benzenesulfonamide	C25H17F2N5O3S	O=S(C1=CC=C(F)C=C1F)(NC2=CC(C3=CC=C4N=CC=C(C5=CC=NN=C5)C4=C3)=CN=C2OC)=O
8	Oncology Drugs Library_10mM	A10	A	10	F00108	MGCD0103_Mocetinostat	HDAC1/2/3/11	S1122	Selleck	100% DMSO	396.454	10	25	-20°C	MGCD0103	C23H20N6O	N-(2-aminophenyl)-4-((4-(pyridin-3-yl)pyrimidin-2-ylamino)methyl)benzamide	C23H20N6O	O=C(NC1=CC=CC=C1N)C2=CC=C(CNC3=NC=CC(C4=CC=CN=C4)=N3)C=C2
9	Oncology Drugs Library_10mM	A11	A	11	F00033	BIBF 1120_Nintedanib	VEGFR, FGFR, PDGFR	S1010	Selleck	100% DMSO	539.636	10	25	-20°C	BIBF 1120	C31H33N5O4	(Z)-methyl 3-((4-(N-methyl-2-(4-methylpiperazin-1-yl)acetamido)phenylamino)(phenyl)methylene)-2-oxoindoline-6-carboxylate	C31H33N5O4	O=C(C1=CC(NC/2=O)=C(C=C1)C2=C(NC3=CC=C(N(C)C(CN4CCN(C)CC4)=O)C=C3)/C5=CC=CC=C5)OC
10	Oncology Drugs Library_10mM	A12	A	12	F00120	FK 506_Tacrolimus	calcineurin	3631	Tocris Biosciences	100% DMSO	804.031	10	25	-20°C	FK 506	C44H69NO12	(3S,4R,5S,8R,9E,12S,14S,15R,16S,18R,19R,26aS)-5,6,8,11,12,13,14,15,16,17,18,19,24,25,26,26a-Hexadecahydro-5,19-dihydroxy-3-[(1E)-2-[(1R,3R,4R)-4-hydroxy-3-methoxycyclohexyl]-1-methylethenyl]-14,16-dimethoxy-4,10,12,18-tetramethyl-8-(2-propen-1-yl)-15,19-epoxy-3H-pyrido[2,1-c][1,4]oxaazacyclotricosine-1,7,20,21(4H,23H)tetrone	C44H69NO12	O=C([C@@](CCCC1)([H])N1C(C([C@@]2(O)[C@H](C)C[C@H](OC)[C@@](O2)([H])[C@@H](OC)C[C@@H](C)C/C(C)=C/[C@H]3CC=C)=O)=O)O[C@H](/C(C)=C/[C@H]4C[C@@H](OC)[C@H](O)CC4)[C@H](C)[C@@H](O)CC3=O
11	Oncology Drugs Library_10mM	A13	A	13	F00041	RD162	androgen receptor	Axon 1532	Axon Medchem	100% DMSO	476.45	10	25	-20°C	RD162	C22H16F4N4O2S	4-[7-(4-Cyano-3-trifluoromethyl-phenyl)-8-oxo-6-thioxo-5,7-diaza-spiro[3.4]oct-5-yl]-2-fluoro-N-methyl-benzamide	C22H16F4N4O2S	O=C(NC)C1=CC=C(N(C(N(C2=CC=C(C#N)C(C(F)(F)F)=C2)C3=O)=S)C43CCC4)C=C1F
12	Oncology Drugs Library_10mM	A14	A	14	F00128	4-hydroxytamoxifen	estrogen receptor	sc-3542	Santa Cruz Biotechnology	100% DMSO	387.523	10	25	-20°C	4-hydroxytamoxifen	C26H29NO2	4-[(Z)-1-[4-[2-(dimethylamino)ethoxy]phenyl]-2-phenylbut-1-enyl]phenol	C26H29NO2	OC1=CC=C(/C(C2=CC=C(OCCN(C)C)C=C2)=C(C3=CC=CC=C3)\CC)C=C1
13	Oncology Drugs Library_10mM	A15	A	15	F00049	AVN944	IMPDH	CT-AVN944	ChemieTek	100% DMSO	477.521	10	25	-20°C	AVN944	C25H27N5O5	(R)-1-cyanobutan-2-yl ((S)-1-(3-(3-(3-methoxy-4-(oxazol-5-yl)phenyl)ureido)phenyl)ethyl)carbamate	C25H27N5O5	O=C(O[C@H](CC)CC#N)N[C@H](C1=CC=CC(NC(NC2=CC=C(C3=CN=CO3)C(OC)=C2)=O)=C1)C
14	Oncology Drugs Library_10mM	A16	A	16	F00136	PF-04708671	p70 ribosomal S6 kinase (S6K1 isoform)	PZ0143	Sigma-Aldrich	100% DMSO	390.414	10	25	-20°C	PF-04708671	C19H21F3N6	2-((4-(5-Ethylpyrimidin-4-yl)piperazin-1-yl)methyl)-5-(trifluoromethyl)-1H-benzo[d]imidazole	C19H21F3N6	FC(C1=CC=C2NC(CN3CCN(C4=NC=NC=C4CC)CC3)=NC2=C1)(F)F
15	Oncology Drugs Library_10mM	A17	A	17	F00057	AV-951 (Tivozanib)	VEGFR1/2/3	CT-AV951	ChemieTek	100% DMSO	454.867	10	25	-20°C	AV-951 (Tivozanib)	C22H19ClN4O5	N-(2-Chloro-4-((6,7-dimethoxy-4-quinolyl)oxy)phenyl)-N′-(5-methyl-3-isoxazolyl)urea	C22H19ClN4O5	O=C(NC1=NOC(C)=C1)NC2=CC=C(OC3=CC=NC4=CC(OC)=C(OC)C=C34)C=C2Cl
16	Oncology Drugs Library_10mM	A18	A	18	F00183	Camptothecin	DNA topoisomerase I	1100	Tocris Biosciences	100% DMSO	348.358	10	25	-20°C	Camptothecin	C20H16N2O4	(S)-4-Ethyl-4-hydroxy-1H-pyrano-[3',4':6,7]indolizino[1,2-b]quinoline-3,14(4H,12H)-dione	C20H16N2O4	O=C1[C@](O)(CC)C2=C(CO1)C(N3CC4=CC5=CC=CC=C5N=C4C3=C2)=O
17	Oncology Drugs Library_10mM	A19	A	19	F00065	AZD1480	JAK1/2	CT-A1480	ChemieTek	100% DMSO	348.77	10	25	-20°C	AZD1480	C14H14ClFN8	(S)-5-chloro-N2-(1-(5-fluoropyrimidin-2-yl)ethyl)-N4-(5-methyl-1H-pyrazol-3-yl)pyrimidine-2,4-diamine	C14H14ClFN8	CC1=CC(NC2=NC(N[C@H](C3=NC=C(F)C=N3)C)=NC=C2Cl)=NN1
18	Oncology Drugs Library_10mM	A20	A	20	F00191	Docetaxel	tubulin	D-1000	LC Laboratories	100% DMSO	150.177	10	25	-20°C	Docetaxel	C9H10O2	Benzenepropanoicacid	C9H10O2	O=C(O)CCC1=CC=CC=C1
19	Oncology Drugs Library_10mM	A21	A	21	F00073	MLN8237_Alisertib	Aurora A kinase	CT-M8237	ChemieTek	100% DMSO	518.929	10	25	-20°C	MLN8237	C27H20ClFN4O4	4-((9-chloro-7-(2-fluoro-6-methoxyphenyl)-5H-benzo[c]pyrimido[4,5-e]azepin-2-yl)amino)-2-methoxybenzoic acid	C27H20ClFN4O4	O=C(O)C1=CC=C(NC2=NC=C3C(C4=CC=C(Cl)C=C4C(C5=C(OC)C=CC=C5F)=NC3)=N2)C=C1OC
20	Oncology Drugs Library_10mM	A22	A	22	F00199	Finasteride	5α-reductase (type II and III)	3293	Tocris Biosciences	100% DMSO	372.553	10	25	-20°C	Finasteride	C23H36N2O2	(5α,17β)-N-(1,1-Dimethylethyl)-3-oxo-4-azaandrost-1-ene-17-carboxamide	C23H36N2O2	C[C@@]12[C@@H](C(NC(C)(C)C)=O)CC[C@@]1([H])[C@]3([H])CC[C@@]4([H])NC(C=C[C@]4(C)[C@@]3([H])CC2)=O
21	Oncology Drugs Library_10mM	B03	B	03	F00207	Clomifene citrate	estrogen receptor	S2561	Selleck	100% DMSO	405.966	10	25	-20°C	Clomifene citrate	C26H28ClNO	2-(4-(2-chloro-1,2-diphenylethenyl) phenoxy)-N,N-diethyl-ethanamine	C26H28ClNO	Cl/C(C1=CC=CC=C1)=C(C2=CC=C(OCCN(CC)CC)C=C2)/C3=CC=CC=C3
22	Oncology Drugs Library_10mM	B04	B	04		Allopurinol	xanthine oxidase
23	Oncology Drugs Library_10mM	B05	B	05	F00215	Tetramisole HCl	alkaline phosphatases	L9756	Sigma-Aldrich	100% DMSO	240.749	10	25	-20°C	Tetramisole HCl	C11H13ClN2S	(S)-(−)-6-Phenyl-2,3,5,6-tetrahydroimidazo[2,1-b]thiazole hydrochloride	C11H13ClN2S	[H]Cl.C12=N[C@@H](C3=CC=CC=C3)CN1CCS2
24	Oncology Drugs Library_10mM	B06	B	06		Temozolomide	DNA alkylation/methylation
25	Oncology Drugs Library_10mM	B07	B	07	F00223	1-methyl-D-tryptophan, 95%	indoleamine 2,3-dioxygenase	452483	Sigma-Aldrich	100% DMSO	218.256	10	25	-20°C	1-methyl-D-tryptophan, 95%	C12H14N2O2	(R)-2-Amino-3-(1-methyl-1H-indol-3-yl)propanoic acid	C12H14N2O2	O=C(O)[C@H](N)CC1=CN(C)C2=C1C=CC=C2
26	Oncology Drugs Library_10mM	B08	B	08		Cytarabine HCl	DNA synthesis inhibitor
27	Oncology Drugs Library_10mM	B09	B	09	F00117	CUDC-101	HDAC, EGFR, HER2	S1194	Selleck	100% DMSO	434.496	10	25	-20°C	CUDC-101	C24H26N4O4	7-(4-(3-ethynylphenylamino)-7-methoxyquinazolin-6-yloxy)-N-hydroxyheptanamide	C24H26N4O4	O=C(NO)CCCCCCOC1=CC2=C(NC3=CC=CC(C#C)=C3)N=CN=C2C=C1OC
28	Oncology Drugs Library_10mM	B10	B	10		Pentostatin	adenosine deaminase
29	Oncology Drugs Library_10mM	B11	B	11	F00147	Tubastatin A HCl	HDAC6	CT-TUBA	ChemieTek	100% DMSO	371.865	10	25	-20°C	Tubastatin A HCl	C20H22ClN3O2	N-hydroxy-4-((2-methyl-3,4-dihydro-1H-pyrido[4,3-b]indol-5(2H)-yl)methyl)benzamide hydrochloride	C20H22ClN3O2	O=C(NO)C1=CC=C(CN2C3=C(CN(C)CC3)C4=C2C=CC=C4)C=C1.[H]Cl
30	Oncology Drugs Library_10mM	B12	B	12		Teniposide	DNA topoisomerase II
31	Oncology Drugs Library_10mM	B13	B	13	F00156	CHIR-258 (Dovitinib)	multiple receptor tyrosine kinases	S1018	Selleck	100% DMSO	392.438	10	25	-20°C	CHIR-258 (Dovitinib)	C21H21FN6O	1-amino-5-fluoro-3-(6-(4-methylpiperazin-1-yl)-1H-benzo[d]imidazol-2-yl)quinolin-2(1H)-one	C21H21FN6O	O=C1N(N)C2=C(C(F)=CC=C2)C=C1C3=NC4=CC=C(N5CCN(C)CC5)C=C4N3
32	Oncology Drugs Library_10mM	B14	B	14		Dactinomycin	DNA transcription inhibitor
33	Oncology Drugs Library_10mM	B15	B	15	F00164	Nelarabine	ribonucleotide reductase	SRP003328n	SequoiaResearchProducts	100% DMSO	297.271	10	25	-20°C	Nelarabine	C11H15N5O5	9H-Purin-2-amine, 9-b-D-arabinofuranosyl-6-methoxy-	C11H15N5O5	NC1=NC(OC)=C2N=CN([C@H]3[C@H]([C@@H]([C@@H](CO)O3)O)O)C2=N1
34	Oncology Drugs Library_10mM	B16	B	16		Zolendronic acid	bone resorption inhibitor
35	Oncology Drugs Library_10mM	B17	B	17	F00174	(R)-Flurbiprofen (Tarenflurbil)	NF-κB, γ-secretase	70255	Cayman Chemical Company	100% DMSO	244.265	10	25	-20°C	(R)-Flurbiprofen (Tarenflurbil)	C15H13FO2	(R)-​(-​)-​2-​fluoro-​α-​methyl-​4-​biphenylacetic acid	C15H13FO2	O=C(O)[C@H](C)C1=CC=C(C2=CC=CC=C2)C(F)=C1
36	Oncology Drugs Library_10mM	B18	B	18		Erlotinib HCl	EGFR
37	Oncology Drugs Library_10mM	B19	B	19		EMPTY
38	Oncology Drugs Library_10mM	B20	B	20		Bleomycin	DNA strand breaks
39	Oncology Drugs Library_10mM	B21	B	21		EMPTY
40	Oncology Drugs Library_10mM	B22	B	22		Vandetanib	VEGFR, EGFR, Ret
41	Oncology Drugs Library_10mM	C03	C	03	F00002	Ridaforolimus	mTORC1	A-1004	Active Biochem	100% DMSO	990.222	10	25	-20°C	Ridaforolimus	C53H84NO14P	(1R,2R,4S)-4-[(2R)-2-[(1R,9S,12S,15R,16E,18R,19R,21R,23S,24E,26E,28Z,30S,32S,35R)-1,18-dihydroxy-19,30-dimethoxy-15,17,21,23,29,35-hexamethyl-2,3,10,14,20-pentaoxo-11,36-dioxa-4-azatricyclo[30.3.1.04,9]hexatriaconta-16,24,26,28-tetraen-12-yl]propyl]-2-methoxycyclohexyl dimethylphosphinate	C53H84NO14P	O=P(C)(C)O[C@H]1[C@H](OC)C[C@H](C[C@H]([C@H](CC([C@H](C)/C=C(C)/[C@@H](O)[C@H]2OC)=O)OC([C@]3([H])CCCCN3C(C([C@@](O4)(O)[C@H](C)CC[C@@]4([H])C[C@H](OC)/C(C)=C\C=C\C=C\[C@@H](C)C[C@@H](C)C2=O)=O)=O)=O)C)CC1
42	Oncology Drugs Library_10mM	C04	C	04	F00082	YM155	survivin	CT-YM155	ChemieTek	100% DMSO	443.301	10	25	-20°C	YM155	C20H19BrN4O3	3-(2-methoxyethyl)-2-methyl-4,9-dioxo-1-(pyrazin-2-ylmethyl)-4,9-dihydro-1H-naphtho[2,3-d]imidazol-3-ium bromide	C20H19BrN4O3	O=C(C1=C2[N+](CCOC)=C(C)N1CC3=NC=CN=C3)C4=C(C=CC=C4)C2=O.[Br-]
43	Oncology Drugs Library_10mM	C05	C	05	F00010	BIRB 796 (Doramapimod)	p38 MAPK	Axon 1358	Axon Medchem	100% DMSO	527.669	10	25	-20°C	BIRB 796 (Doramapimod)	C31H37N5O3	1-(5-tert-Butyl-2-p-tolyl-2H-pyrazol-3-yl)-3-[4-(2-morpholin-4-yl-ethoxy)-naphthalen-1-yl]-urea	C31H37N5O3	O=C(NC1=C2C=CC=CC2=C(OCCN3CCOCC3)C=C1)NC4=CC(C(C)(C)C)=NN4C5=CC=C(C)C=C5
44	Oncology Drugs Library_10mM	C06	C	06	F00093	PHA-739358 (Danusertib)	Aurora kinases	S1107	Selleck	100% DMSO	474.565	10	25	-20°C	PHA-739358 (Danusertib)	C26H30N6O3	(R)-N-(5-(2-methoxy-2-phenylacetyl)-1,4,5,6-tetrahydropyrrolo[3,4-c]pyrazol-3-yl)-4-(4-methylpiperazin-1-yl)benzamide	C26H30N6O3	O=C(NC1=NNC2=C1CN(C([C@H](OC)C3=CC=CC=C3)=O)C2)C4=CC=C(N5CCN(C)CC5)C=C4
45	Oncology Drugs Library_10mM	C07	C	07	F00018	VX-11e	ERK2	CT-VX11e	ChemieTek	100% DMSO	500.355	10	25	-20°C	VX-11e	C24H20Cl2FN5O2	4-[2-[(2-Chloro-4-fluorophenyl)amino]-5-methyl-4-pyrimidinyl]-N-[(1S)-1-(3-chlorophenyl)-2-hydroxyethyl]-1H-pyrrole-2-carboxamide	C24H20Cl2FN5O2	O=C(C1=CC(C2=NC(NC3=CC=C(F)C=C3Cl)=NC=C2C)=CN1)N[C@@H](C4=CC=CC(Cl)=C4)CO
46	Oncology Drugs Library_10mM	C08	C	08	F00101	PCI-32765_Ibrutinib	BTK	S2680	Selleck	100% DMSO	440.507	10	25	-20°C	PCI-32765	C25H24N6O2	(R)-1-(3-(4-amino-3-(4-phenoxyphenyl)-1H-pyrazolo[3,4-d]pyrimidin-1-yl)piperidin-1-yl)prop-2-en-1-one	C25H24N6O2	C=CC(N1C[C@H](N2N=C(C3=CC=C(OC4=CC=CC=C4)C=C3)C5=C(N)N=CN=C52)CCC1)=O
47	Oncology Drugs Library_10mM	C09	C	09	F00026	ABT-263 (Navitoclax)	Bcl-2, Bcl-XL, Bcl-W	S1001	Selleck	100% DMSO	974.611	10	25	-20°C	ABT-263 (Navitoclax)	C47H55ClF3N5O6S3	4-[4-[[2-(4-Chlorophenyl)-5,5-dimethyl-1-cyclohexen-1-yl]methyl]-1-piperazinyl]-N-[[4-[[(1R)-3-(4-morpholinyl)-1-[(phenylthio)methyl]propyl]amino]-3-[(trifluoromethyl)sulfonyl]phenyl]sulfonyl]benzamide	C47H55ClF3N5O6S3	O=C(NS(=O)(C1=CC=C(N[C@@H](CSC2=CC=CC=C2)CCN3CCOCC3)C(S(=O)(C(F)(F)F)=O)=C1)=O)C4=CC=C(N5CCN(CC6=C(C7=CC=C(Cl)C=C7)CCC(C)(C)C6)CC5)C=C4
48	Oncology Drugs Library_10mM	C10	C	10	F00109	CPI-613	α-ketoglutarate dehydrogenase	S2776	Selleck	100% DMSO	388.584	10	25	-20°C	CPI-613	C22H28O2S2	6,8-bis(benzylthio)octanoic acid	C22H28O2S2	O=C(O)CCCCC(SCC1=CC=CC=C1)CCSCC2=CC=CC=C2
49	Oncology Drugs Library_10mM	C11	C	11	F00034	BI 2536	PLK1	S1109	Selleck	100% DMSO	521.666	10	25	-20°C	BI 2536	C28H39N7O3	(R)-4-(8-cyclopentyl-7-ethyl-5-methyl-6-oxo-5,6,7,8-tetrahydropteridin-2-ylamino)-3-methoxy-N-(1-methylpiperidin-4-yl)benzamide	C28H39N7O3	O=C(NC1CCN(C)CC1)C2=CC=C(NC(N=C3N(C4CCCC4)[C@@H]5CC)=NC=C3N(C)C5=O)C(OC)=C2
50	Oncology Drugs Library_10mM	C12	C	12	F00121	GSK 269962	ROCK1/2	4009	Tocris Biosciences	100% DMSO	570.61	10	25	-20°C	GSK 269962	C29H30N8O5	N-[3-[[2-(4-Amino-1,2,5-oxadiazol-3-yl)-1-ethyl-1H-imidazo[4,5-c]pyridin-6-yl]oxy]phenyl]-4-[2-(4-morpholinyl)ethoxy]benzamide	C29H30N8O5	O=C(NC1=CC=CC(OC2=CC3=C(N=C(C4=NON=C4N)N3CC)C=N2)=C1)C5=CC=C(OCCN6CCOCC6)C=C5
51	Oncology Drugs Library_10mM	C13	C	13	F00042	MDV3100_Enzaluamide	androgen receptor	Axon 1613	Axon Medchem	100% DMSO	464.439	10	25	-20°C	MDV3100	C21H16F4N4O2S	4-[3-[4-Cyano-3-(trifluoromethyl)phenyl]-5,5-dimethyl-4-oxo-2-thioxo-1-imidazolidinyl]-2-fluoro-N-methyl-Benzamide	C21H16F4N4O2S	O=C(NC)C1=CC=C(N(C(N2C3=CC=C(C#N)C(C(F)(F)F)=C3)=S)C(C)(C)C2=O)C=C1F
52	Oncology Drugs Library_10mM	C14	C	14	F00129	Prednisone	glucocorticoid receptors	sc-205816	Santa Cruz Biotechnology	100% DMSO	358.434	10	25	-20°C	Prednisone	C21H26O5	(8S,9S,10R,13S,14S,17R)-17-hydroxy-17-(2-hydroxyacetyl)-10, 13-dimethyl-6,7,8,9,12,14,15,16-octahydrocyclopenta[a]phenanthrene-3, 11-dione	C21H26O5	O=C(C=C1CC[C@@]2([H])[C@]3([H])CC[C@@](C(CO)=O)(O)[C@@]3(C)C4)C=C[C@]1(C)[C@@]2([H])C4=O
53	Oncology Drugs Library_10mM	C15	C	15	F00050	AZD8055	mTORC1/2	CT-A8055	ChemieTek	100% DMSO	465.554	10	25	-20°C	AZD8055	C25H31N5O4	(5-(2,4-bis((3S)-3-methylmorpholin-4-yl)pyrido(2,3-d)pyrimidin-7-yl)-2-methoxyphenyl)methanol	C25H31N5O4	OCC1=CC(C2=NC3=NC(N4[C@@H](C)COCC4)=NC(N5[C@@H](C)COCC5)=C3C=C2)=CC=C1OC
54	Oncology Drugs Library_10mM	C16	C	16	F00137	Enzastaurin	PKC-β	E-4506	LC Laboratories	100% DMSO	515.617	10	25	-20°C	Enzastaurin	C32H29N5O2	3-(1-Methyl-1H-indol-3-yl)-4-[1-[1-(2-pyridinylmethyl)-4-piperidinyl]-1H-indol-3-yl]-1H-pyrrole-2,5-dione	C32H29N5O2	O=C(C(C1=CN(C)C2=C1C=CC=C2)=C3C4=CN(C5CCN(CC6=NC=CC=C6)CC5)C7=C4C=CC=C7)NC3=O
55	Oncology Drugs Library_10mM	C17	C	17	F00058	OSI-027	mTORC1/2	CT-O027	ChemieTek	100% DMSO	442.904	10	25	-20°C	OSI-027	C21H23ClN6O3	4-(4-amino-5-(7-methoxy-1H-indol-2-yl)imidazo[5,1-f][1,2,4]triazin-7-yl)cyclohexanecarboxylic acid hydrochloride.	C21H23ClN6O3	O=C(C1CCC(C2=NC(C(N3)=CC4=C3C(OC)=CC=C4)=C5C(N)=NC=NN52)CC1)O.[H]Cl
56	Oncology Drugs Library_10mM	C18	C	18	F00184	Rapamycin (sirolimus)	mTORC1	R-5000	LC Laboratories	100% DMSO	473.616	10	25	-20°C	Rapamycin (sirolimus)	C33H31NO2	23,27-Epoxy-3H-pyrido[2,1-c][1,4]oxaazacyclohentriacontine	C33H31NO2	C12=C/OC/C=C/C=C/C=C/C=C/C=C\C=C\C=C\C=C\C=C/C=C(O3)\C=CC=C3/C=C/N/1C=CC=C2
57	Oncology Drugs Library_10mM	C19	C	19	F00066	MK-4827, HCl salt	PARP1/2	CT-MK4827	ChemieTek	100% DMSO	320.396	10	25	-20°C	MK-4827, HCl salt	C19H20N4O	2-[4-[(3S)-piperidin-3-yl]phenyl]indazole-7-carboxamide	C19H20N4O	O=C(C1=CC=CC2=CN(C3=CC=C([C@H]4CNCCC4)C=C3)N=C12)N
58	Oncology Drugs Library_10mM	C20	C	20	F00192	HA-1077 (Fasudil)	ROCK	H-2330	LC Laboratories	100% DMSO	364.285	10	25	-20°C	HA-1077 (Fasudil)	C14H19Cl2N3O2S	1-(5-Isoquinolinesulfonyl)homopiperazine Dihydrochloride	C14H19Cl2N3O2S	O=S(N1CCNCCC1)(C2=CC=CC3=C2C=CN=C3)=O.[H]Cl.[H]Cl
59	Oncology Drugs Library_10mM	C21	C	21	F00074	PIK-75 HCl	PI3K-p110α	CT-PIK75	ChemieTek	100% DMSO	488.741	10	25	-20°C	PIK-75 HCl	C16H15BrClN5O4S	(E)-N'-((6-bromoimidazo[1,2-a]pyridin-3-yl)methylene)-N,2-dimethyl-5-nitrobenzenesulfonohydrazide hydrochloride	C16H15BrClN5O4S	O=S(C1=CC([N+]([O-])=O)=CC=C1C)(N(C)/N=C/C2=CN=C3C=CC(Br)=CN32)=O.[H]Cl
60	Oncology Drugs Library_10mM	C22	C	22	F00200	Flutamide	androgen receptor	4094	Tocris Biosciences	100% DMSO	276.215	10	25	-20°C	Flutamide	C11H11F3N2O3	2-Methyl-N-(4-nitro-3-[trifluoromethyl]phenyl)propanamide	C11H11F3N2O3	CC(C)C(NC1=CC=C([N+]([O-])=O)C(C(F)(F)F)=C1)=O
61	Oncology Drugs Library_10mM	D03	D	03	F00208	Busulfan	DNA crosslinking	B2635	Sigma-Aldrich	100% DMSO	246.292	10	25	-20°C	Busulfan	C6H14O6S2	1,4-Butanediol dimethanesulfonate	C6H14O6S2	CS(=O)(OCCCCOS(C)(=O)=O)=O
62	Oncology Drugs Library_10mM	D04	D	04		Fluorouracil	thymidylate synthase
63	Oncology Drugs Library_10mM	D05	D	05	F00216	Quinacrine HCl	DNA topoisomerase, NF-κB	Q3251	Sigma-Aldrich	100% DMSO	472.879	10	25	-20°C	Quinacrine HCl	C23H32Cl3N3O	6-Chloro-9-(4-diethylamino-1-methylbutylamino)-2-methoxyacridine dihydrochloride	C23H32Cl3N3O	COC1=CC2=C(NC(C)CCCN(CC)CC)C3=CC=C(Cl)C=C3N=C2C=C1.[H]Cl.[H]Cl
64	Oncology Drugs Library_10mM	D06	D	06		Altretamine	DNA alkylation
65	Oncology Drugs Library_10mM	D07	D	07	F00224	Aspirin (Acetylsalicylic Acid)	cyclooxygenases	PHR1003-1g	Fluka Analytical	100% DMSO	180.157	10	25	-20°C	Aspirin (Acetylsalicylic Acid)	C9H8O4	2-acetyloxybenzoic acid/acetylsalicylate/acetylsalicylic acid/O-acetylsalicylic acid	C9H8O4	O=C(Oc1ccccc1C(=O)O)C
66	Oncology Drugs Library_10mM	D08	D	08		Thalidomide	angiogenesis inhibitor
67	Oncology Drugs Library_10mM	D09	D	09	F00140	Iniparib (BSI-201, IND-71677)	PARP (disproved)	Axon 1566	Axon Medchem	100% DMSO	292.032	10	25	-20°C	Iniparib (BSI-201, IND-71677)	C7H5IN2O3	4-iodo-3-nitrobenzamide	C7H5IN2O3	O=C(N)C1=CC=C(I)C([N+]([O-])=O)=C1
68	Oncology Drugs Library_10mM	D10	D	10		Gemcitabine HCl	ribonucleotide reductase
69	Oncology Drugs Library_10mM	D11	D	11	F00148	TGX-221	PI3K-p110β	CT-TGX221	ChemieTek	100% DMSO	364.449	10	25	-20°C	TGX-221	C21H24N4O2	7-methyl-2-morpholino-9-(1-(phenylamino)ethyl)-4H-pyrido[1,2-a]pyrimidin-4-one	C21H24N4O2	O=C1C=C(N2CCOCC2)N=C3N1C=C(C)C=C3C(NC4=CC=CC=C4)C
70	Oncology Drugs Library_10mM	D12	D	12		Pipobroman	DNA alkylation
71	Oncology Drugs Library_10mM	D13	D	13	F00157	ABT-751	tubulin	S1165	Selleck	100% DMSO	371.411	10	25	-20°C	ABT-751	C18H17N3O4S	N-(2-(4-hydroxyphenylamino)pyridin-3-yl)-4-methoxybenzenesulfonamide	C18H17N3O4S	O=S(C1=CC=C(OC)C=C1)(NC2=CC=CN=C2NC3=CC=C(O)C=C3)=O
72	Oncology Drugs Library_10mM	D14	D	14		Vinorelbine tartrate	tubulin
73	Oncology Drugs Library_10mM	D15	D	15	F00165	PF4800567 hydrochloride	CK1ε	4281	Tocris Biosciences	100% DMSO	396.272	10	25	-20°C	PF4800567 hydrochloride	C17H19Cl2N5O2	3-[(3-Chlorophenoxy)methyl]-1-(tetrahydro-2H-pyran-4-yl)-1H-pyrazolo[3,4-d]pyrimidin-4-amine hydrochloride	C17H19Cl2N5O2	NC1=C2C(N(C3CCOCC3)N=C2COC4=CC=CC(Cl)=C4)=NC=N1.[H]Cl
74	Oncology Drugs Library_10mM	D16	D	16		Lenalidomide	angiogenesis inhibitor
75	Oncology Drugs Library_10mM	D17	D	17	F00175	Tandutinib	FLT3	T-7802	LC Laboratories	100% DMSO	562.715	10	25	-20°C	Tandutinib	C31H42N6O4	4-[6-methoxy-7-[3-(1-piperidinyl)propoxy]-4-quinazolinyl]-N-[4-(1-methylethoxy)phenyl]-1-piperazinecarboxamide	C31H42N6O4	O=C(N1CCN(C2=C3C=C(OC)C(OCCCN4CCCCC4)=CC3=NC=N2)CC1)NC5=CC=C(OC(C)C)C=C5
76	Oncology Drugs Library_10mM	D18	D	18		Imatinib	Bcr-Abl
77	Oncology Drugs Library_10mM	D19	D	19		EMPTY
78	Oncology Drugs Library_10mM	D20	D	20		Paclitaxel	tubulin
79	Oncology Drugs Library_10mM	D21	D	21		EMPTY
80	Oncology Drugs Library_10mM	D22	D	22		Vemurafenib	mutant B-Raf (V600E)
81	Oncology Drugs Library_10mM	E03	E	03	F00003	PX-866_Sonolisib	PI3K	PX-866	Active Biochem	100% DMSO	525.598	10	25	-20°C	PX-866	C29H35NO8	(4S,4aR,5R,6aS,9aR,E)-1-((diallylamino)methylene)-11-hydroxy-4-(methoxymethyl)-4a,6a-dimethyl-2,7,10-trioxo-1,2,4,4a,5,6,6a,7,8,9,9a,10-dodecahydroindeno[4,5-h]isochromen-5-yl acetate	C29H35NO8	CC(O[C@@H](C1=C2C(C(O)=C3/C(C(O[C@H](COC)[C@]13C)=O)=C\N(CC=C)CC=C)=O)C[C@]4(C)C(CC[C@]42[H])=O)=O
82	Oncology Drugs Library_10mM	E04	E	04	F00083	I-BET151 (GSK1210151A)	BRD2/3/4	CT-BET151	ChemieTek	100% DMSO	415.453	10	25	-20°C	I-BET151 (GSK1210151A)	C23H21N5O3	7-(3,5-dimethylisoxazol-4-yl)-8-methoxy-1-((R)-1-(pyridin-2-yl)ethyl)-1H-imidazo[4,5-c]quinolin-2(3H)-one	C23H21N5O3	O=C(N1[C@@H](C2=NC=CC=C2)C)NC3=C1C4=CC(OC)=C(C5=C(C)ON=C5C)C=C4N=C3
83	Oncology Drugs Library_10mM	E05	E	05	F00011	MK1775	WEE1	Axon 1494	Axon Medchem	100% DMSO	500.607	10	25	-20°C	MK1775	C27H32N8O2	1,2-dihydro-1-[6-(1-hydroxy-1-methylethyl)-2-pyridinyl]-6-[[4-(4-methyl-1-piperazinyl)phenyl]amino]-2-(2-propen-1-yl)-3H-Pyrazolo[3,4-d]pyrimidin-3-one	C27H32N8O2	O=C1N(CC=C)N(C2=NC(C(C)(O)C)=CC=C2)C3=NC(NC4=CC=C(N5CCN(C)CC5)C=C4)=NC=C31
84	Oncology Drugs Library_10mM	E06	E	06	F00094	Motesanib Diphosphate (AMG-706)	VEGFR1/2/3	S1032	Selleck	100% DMSO	471.454	10	25	-20°C	Motesanib Diphosphate (AMG-706)	C22H26N5O5P	3-Pyridinecarboxamide, N-(2,3-dihydro-3,3-dimethyl-1H-indol-6-yl)-2-[(4-pyridinylmethyl)amino]-, phosphate	C22H26N5O5P	O=C(C1=CC=CN=C1NCC2=CC=NC=C2)NC3=CC4=C(C=C3)C(C)(C)CN4.O=P(O)(O)O
85	Oncology Drugs Library_10mM	E07	E	07	F00019	Epothilone B (Patupilone)	tubulin	E-5500	LC Laboratories	100% DMSO	507.686	10	25	-20°C	Epothilone B (Patupilone)	C27H41NO6S	(1S,3S,7S,10R,11S,12S,16R)-7,11-dihydroxy-8,8,10,12,16-pentamethyl-3-[(E)-1-(2-methyl-1,3-thiazol-4-yl)prop-1-en-2-yl]-4,17-dioxabicyclo[14.1.0]heptadecane-5,9-dione	C27H41NO6S	O=C(C[C@H](O)C1(C)C)O[C@H](/C(C)=C/C2=CSC(C)=N2)C[C@]3([H])O[C@]3(C)CCC[C@H](C)[C@H](O)[C@@H](C)C1=O
86	Oncology Drugs Library_10mM	E08	E	08	F00102	LY2603618_Rabusertib	Chk2	S2626	Selleck	100% DMSO	436.31	10	25	-20°C	LY2603618	C18H22BrN5O3	(S)-1-(5-bromo-4-methyl-2-(morpholin-2-ylmethoxy)phenyl)-3-(5-methylpyrazin-2-yl)urea	C18H22BrN5O3	O=C(NC1=NC=C(C)N=C1)NC2=CC(Br)=C(C)C=C2OC[C@@H]3CNCCO3
87	Oncology Drugs Library_10mM	E09	E	09	F00027	AT9283	Aurora kinases	S1134	Selleck	100% DMSO	381.44	10	25	-20°C	AT9283	C19H23N7O2	1-cyclopropyl-3-(3-(5-(morpholinomethyl)-1H-benzo[d]imidazol-2-yl)-1H-pyrazol-4-yl)urea	C19H23N7O2	O=C(NC1=CNN=C1C2=NC3=CC(CN4CCOCC4)=CC=C3N2)NC5CC5
88	Oncology Drugs Library_10mM	E10	E	10	F00110	ABT-869_Linifanib	VEGFR, PDGFR	S1003	Selleck	100% DMSO	375.407	10	25	-20°C	ABT-869	C21H18FN5O	1-[4-(3-amino-1H-indazol-4-yl)phenyl]-3-(2-fluoro-5-methylphenyl)urea	C21H18FN5O	O=C(NC1=CC(C)=CC=C1F)NC2=CC=C(C3=CC=CC4=C3C(N)=NN4)C=C2
89	Oncology Drugs Library_10mM	E11	E	11	F00035	RAF265	multiple intracellular kinases	S2161	Selleck	100% DMSO	518.423	10	25	-20°C	RAF265	C24H16F6N6O	1-methyl-5-(2-(5-(trifluoromethyl)-1H-imidazol-2-yl)pyridin-4-yloxy)-N-(4-(trifluoromethyl)phenyl)-1H-benzo[d]imidazol-2-amine	C24H16F6N6O	FC(C1=CC=C(NC2=NC3=CC(OC4=CC(C5=NC=C(C(F)(F)F)N5)=NC=C4)=CC=C3N2C)C=C1)(F)F
90	Oncology Drugs Library_10mM	E12	E	12	F00122	AT 101	Bcl-XL	3367	Tocris Biosciences	100% DMSO	518.562	10	25	-20°C	AT 101	C30H30O8	(-)-1,1',6,6',7,7'-Hexahydroxy-3,3'-dimethyl-5,5'-bis(1-methylethyl)-[2,2'-binaphthalene]-8,8'-dicarboxaldehyde	C30H30O8	O=CC1=C(O)C(O)=C(C(C)C)C2=CC(C)=C(C3=C(C)C=C4C(C(C)C)=C(O)C(O)=C(C=O)C4=C3O)C(O)=C12
91	Oncology Drugs Library_10mM	E13	E	13	F00043	FK-866 HCl_Daporinad	NAMPT	Axon 1546	Axon Medchem	100% DMSO	427.973	10	25	-20°C	FK-866 HCl	C24H30ClN3O2	(E)-N-[4-[1-(benzoyl)piperidin-4-yl]butyl]-3-pyridin-3-ylprop-2-enamide hydrochloride	C24H30ClN3O2	O=C(NCCCCC1CCN(C(C2=CC=CC=C2)=O)CC1)/C=C/C3=CC=CN=C3.[H]Cl
92	Oncology Drugs Library_10mM	E14	E	14	F00130	Estramustine sodium phosphate	tubulin	E0407	Sigma-Aldrich	100% DMSO	1485.15	10	25	-20°C	Estramustine sodium phosphate	C69H93Cl6N3Na3O13P	Estra-1,3,5(10)triene-3,17ß-diol 3-[N,N-bis(2-chloroethyl)carbamate] 17-(dihydrogen phosphate) sodium salt	C69H93Cl6N3Na3O13P	O=C(N(CCCl)CCCl)OC(C=C1)=CC2=C1[C@@]3([H])CC[C@]4(C)[C@@H](O)CC[C@@]4([H])[C@]3([H])CC2.O=C(N(CCCl)CCCl)OC(C=C5)=CC6=C5[C@@]7([H])CC[C@]8(C)[C@@H](O)CC[C@@]8([H])[C@]7([H])CC6.O=C(N(CCCl)CCCl)OC(C=C9)=CC%10=C9[C@@]%11([H])CC[C@]%12(C)[C@@H](O)CC[C@@]%12([H])[C@]%11([H])CC%10.O=P([O-])([O-])[O-].[Na+].[Na+].[Na+]
93	Oncology Drugs Library_10mM	E15	E	15	F00051	AZD4547	FGFR	CT-A4547	ChemieTek	100% DMSO	463.582	10	25	-20°C	AZD4547	C26H33N5O3	N-(5-(3,5-dimethoxyphenethyl)-1H-pyrazol-3-yl)-4-((3S,5R)-3,5-dimethylpiperazin-1-yl)benzamide	C26H33N5O3	O=C(NC1=NNC(CCC2=CC(OC)=CC(OC)=C2)=C1)C3=CC=C(N4C[C@H](C)N[C@H](C)C4)C=C3
94	Oncology Drugs Library_10mM	E16	E	16	F00154	Bexarotene	retinoid X receptor agonist	sc-217753	Santa Cruz Biotechnology	100% DMSO	350.502	10	25	-20°C	Bexarotene	C24H30O2	4-[1-(3,5,5,8,8-pentamethyltetralin-2-yl)ethenyl] benzoic acid	C24H30O2	O=C(O)C1=CC=C(C(C2CC3=C(C(C)(C)C=CC3(C)C)CC2C)=C)C=C1
95	Oncology Drugs Library_10mM	E17	E	17	F00059	PF-04691502	mTOR, PI3K	CT-PF1502	ChemieTek	100% DMSO	425.489	10	25	-20°C	PF-04691502	C22H27N5O4	2-amino-8-[trans-4-(2-hydroxyethoxy)cyclohexyl]-6-(6-methoxypyridin-3-yl)-4-methylpyrido[2,3-d]pyrimidin-7(8H)-one	C22H27N5O4	O=C1C(C2=CC=C(OC)N=C2)=CC3=C(C)N=C(N)N=C3N1[C@H]4CC[C@H](OCCO)CC4
96	Oncology Drugs Library_10mM	E18	E	18	F00185	Lapatinib, di-p-toluenesulfonate salt	HER2, EGFR	L-4804	LC Laboratories	100% DMSO	925.455	10	25	-20°C	Lapatinib, di-p-toluenesulfonate salt	C43H42ClFN4O10S3	N-[3-chloro-4-[(3-fluorophenyl)methoxy]phenyl]-6-[5-[(2-methylsulfonylethylamino)methyl]furan-2-yl]quinazolin-4-amine Ditosylate	C43H42ClFN4O10S3	O=S(CCNCC1=CC=C(C2=CC3=C(NC4=CC=C(OCC5=CC=CC(F)=C5)C(Cl)=C4)N=CN=C3C=C2)O1)(C)=O.OS(=O)(C6=CC=C(C)C=C6)=O.OS(=O)(C7=CC=C(C)C=C7)=O
97	Oncology Drugs Library_10mM	E19	E	19	F00067	AC220_Quizartinib	FLT3	CT-AC220	ChemieTek	100% DMSO	633.589	10	25	-20°C	AC220	C29H34Cl2N6O4S	N-(5-tert-butyl-isoxazol-3-yl)-N'-{4-[7-(2-morpholin-4-yl-ethoxy)imidazo[2,1-b][1,3]benzothiazol-2-yl]phenyl}urea dihydrochloride	C29H34Cl2N6O4S	O=C(NC1=CC=C(C2=CN3C(SC4=CC(OCCN5CCOCC5)=CC=C34)=N2)C=C1)NC6=NOC(C(C)(C)C)=C6.[H]Cl.[H]Cl
98	Oncology Drugs Library_10mM	E20	E	20	F00193	Dasatinib	Bcr-Abl	D-3307	LC Laboratories	100% DMSO	488.007	10	25	-20°C	Dasatinib	C22H26ClN7O2S	N-(2-Chloro-6-methylphenyl)-2-[[6-[4-(2-hydroxyethyl)piperazin-1-yl]-2-methylpyrimidin-4-yl]amino]-1,3-thiazole-5-carboxamide	C22H26ClN7O2S	O=C(C1=CN=C(NC2=NC(C)=NC(N3CCN(CCO)CC3)=C2)S1)NC4=C(C)C=CC=C4Cl
99	Oncology Drugs Library_10mM	E21	E	21	F00075	PLX4032_Vemurafenib	B-Raf	CT-P4032	ChemieTek	100% DMSO	489.922	10	25	-20°C	PLX4032	C23H18ClF2N3O3S	N-(3-(5-(4-chlorophenyl)-1H-pyrrolo[2,3-b]pyridine-3-carbonyl)-2,4-difluorophenyl)propane-1-sulfonamide	C23H18ClF2N3O3S	CCCS(=O)(NC1=CC=C(F)C(C(C2=CNC3=NC=C(C4=CC=C(Cl)C=C4)C=C32)=O)=C1F)=O
100	Oncology Drugs Library_10mM	E22	E	22	F00201	Pilocarpine	muscarinic receptor agonist	694	Tocris Biosciences	100% DMSO	244.719	10	25	-20°C	Pilocarpine	C11H17ClN2O2	(3S-cis)-3-Ethyldihydro-4-[(1-methyl-1H-imidazol-5-yl)methyl]-2(3H)-furanone hydrochloride	C11H17ClN2O2	O=C1OC[C@H](CC2=CN=CN2C)[C@@H]1CC.[H]Cl
101	Oncology Drugs Library_10mM	F03	F	03	F00209	Pemetrexed	purine and pyrimidine biosynthesis	P-7177	LC Laboratories	100% DMSO	597.486	10	25	-20°C	Pemetrexed	C20H33N5Na2O13	N-[4-[2-(2-Amino-4,7-dihydro-4-oxo-1H-pyrrolo[2,3-d]pyrimidin-5-yl)ethyl]benzoyl]-L-glutamic acid Disodium Heptahydrate	C20H33N5Na2O13	O=C([O-])CC[C@@H](C([O-])=O)NC(C1=CC=C(CCC2=CNC(NC(N)=N3)=C2C3=O)C=C1)=O.[H]O[H].[H]O[H].[H]O[H].[H]O[H].[H]O[H].[H]O[H].[H]O[H].[Na+].[Na+]
102	Oncology Drugs Library_10mM	F04	F	04		Thioguanine	guanine biosynthesis
103	Oncology Drugs Library_10mM	F05	F	05	F00217	Arsenic(III) oxide	oxidative stress, NF-κB inhibition, etc.	202673	Sigma-Aldrich	100% DMSO	197.841	10	25	-20°C	Arsenic(III) oxide	As2O3	Arsenic trioxide	As2O3	O1[As]2O[As]1O2
104	Oncology Drugs Library_10mM	F06	F	06		Floxuridine	thymidylate synthase
105	Oncology Drugs Library_10mM	F07	F	07	F00087	Masitinib	c-Kit, PDGFR, FGFR	M-7007	LC Laboratories	100% DMSO	498.649	10	25	-20°C	Masitinib	C28H30N6OS	4-[(4-methyl-1-piperazinyl)methyl]-N-[4-methyl-3-[[4-(3-pyridinyl)-2-thiazolyl]amino]phenyl]-benzamide	C28H30N6OS	O=C(NC1=CC=C(C)C(NC2=NC(C3=CC=CN=C3)=CS2)=C1)C4=CC=C(CN5CCN(C)CC5)C=C4
106	Oncology Drugs Library_10mM	F08	F	08		Procarbazine	DNA alkylation
107	Oncology Drugs Library_10mM	F09	F	09	F00141	Bicalutamide	androgen receptor	CT-BIC	ChemieTek	100% DMSO	430.374	10	25	-20°C	Bicalutamide	C18H14F4N2O4S	N-[4-cyano-3-(trifluoromethyl)phenyl]-3-[(4-fluorophenyl)sulfonyl]-2-hydroxy-2-methylpropanamide	C18H14F4N2O4S	O=C(NC1=CC=C(C#N)C(C(F)(F)F)=C1)C(C)(O)CS(=O)(C2=CC=C(F)C=C2)=O
108	Oncology Drugs Library_10mM	F10	F	10		Chlorambucil	DNA alkylation and crosslinking
109	Oncology Drugs Library_10mM	F11	F	11	F00149	Rofecoxib (Vioxx)	cyclooxygenase-2	CT-RX001	ChemieTek	100% DMSO	314.355	10	25	-20°C	Rofecoxib (Vioxx)	C17H14O4S	3-(4-Methanesulfonylphenyl)-2-phenyl-2-buten-4-olide	C17H14O4S	O=S(C1=CC=C(C(CO2)=C(C3=CC=CC=C3)C2=O)C=C1)(C)=O
110	Oncology Drugs Library_10mM	F12	F	12		Megestrol acetate	progesterone receptor agonist
111	Oncology Drugs Library_10mM	F13	F	13	F00158	FG-4592	HIF-specific prolyl hydroxylases	S1007	Selleck	100% DMSO	352.346	10	25	-20°C	FG-4592	C19H16N2O5	2-(4-hydroxy-1-methyl-7-phenoxyisoquinoline-3-carboxamido)acetic acid	C19H16N2O5	O=C(O)CNC(C1=C(O)C2=C(C(C)=N1)C=C(OC3=CC=CC=C3)C=C2)=O
112	Oncology Drugs Library_10mM	F14	F	14		Azacitidine	cytosine analog
113	Oncology Drugs Library_10mM	F15	F	15	F00166	GSK 650394	SGK	3572	Tocris Biosciences	100% DMSO	382.463	10	25	-20°C	GSK 650394	C25H22N2O2	2-Cyclopentyl-4-(5-phenyl-1H-pyrrolo[2,3-b]pyridin-3-yl)-benzoic acid	C25H22N2O2	O=C(O)C1=CC=C(C2=CNC3=NC=C(C4=CC=CC=C4)C=C32)C=C1C5CCCC5
114	Oncology Drugs Library_10mM	F16	F	16		Clofarabine	purine nucleoside antimetabolite
115	Oncology Drugs Library_10mM	F17	F	17	F00176	XAV-939	tankyrase 1/2 (Wnt-β-catenin pathway)	S1180	Selleck	100% DMSO	312.31	10	25	-20°C	XAV-939	C14H11F3N2OS	2-(4-(trifluoromethyl)phenyl)-7,8-dihydro-5H-thiopyrano[4,3-d]pyrimidin-4-ol	C14H11F3N2OS	OC1=C(CSCC2)C2=NC(C3=CC=C(C(F)(F)F)C=C3)=N1
116	Oncology Drugs Library_10mM	F18	F	18		Raloxifene HCl	selective estrogen receptor modulator
117	Oncology Drugs Library_10mM	F19	F	19		EMPTY
118	Oncology Drugs Library_10mM	F20	F	20		Valrubicin	DNA synthesis
119	Oncology Drugs Library_10mM	F21	F	21		EMPTY
120	Oncology Drugs Library_10mM	F22	F	22		Cabazitaxel	tubulin
121	Oncology Drugs Library_10mM	G03	G	03	F00004	LY 333531 mesylate_Ruboxistaurin	PKC-β	Axon 1401	Axon Medchem	100% DMSO	564.657	10	25	-20°C	LY 333531 mesylate	C29H32N4O6S	9H,18H-5,21:12,17-Dimethenodibenzo[e,k]pyrrolo[3.4-h][1,4,13]oxadiazacyclohexadecine-18,20(19H)-dione, 9-[(dimethylamino)methyl]-6,7,10,11-tetrahydro-, (9S)-, methanesulfonate (1:1)	C29H32N4O6S	O=C1NC(C(C2=CN(C3=CC=CC=C32)CCO[C@H](CN(C)C)CC4)=C1C5=CN4C6=CC=CC=C56)=O.CS(=O)(O)=O
122	Oncology Drugs Library_10mM	G04	G	04	F00084	Lestaurtinib	multiple tyrosine kinases	L-6307	LC Laboratories	100% DMSO	441.487	10	25	-20°C	Lestaurtinib	C26H23N3O4	9,12-Epoxy-1H-diindolo[1,2,3-fg:3',2',1'-kl]pyrrolo[3,4-i][1,6]benzodiazocin-1-one,2,3,9,10,11,12-hexahydro-10-hydroxy-10-(hydroxymethyl)-9-methyl-, (9S,10S,12R)-	C26H23N3O4	O=C(CCC=C12)C1=C3C4=CN=CC4=C5C6=C3N2C/C=C\[C@@](O7)(C)N6(CO)(O)C8=C5C=C[C@@]7([H])C8
123	Oncology Drugs Library_10mM	G05	G	05	F00012	Plerixafor	CXCR4	10011332	Cayman Chemical Company	100% DMSO	794.46	10	25	-20°C	Plerixafor	C28H62Cl8N8	1,​4-​bis((1,​4,​8,​11-​tetraazacyclotetradecan-​1-​yl)methyl)benzene,​ octahydrochloride	C28H62Cl8N8	[H]Cl.[H]Cl.[H]Cl.[H]Cl.[H]Cl.[H]Cl.[H]Cl.[H]Cl.C1(CN2CCNCCCNCCNCCC2)=CC=C(CN3CCNCCCNCCNCCC3)C=C1
124	Oncology Drugs Library_10mM	G06	G	06	F00095	LY2784544_Gandotinib	JAK2	S2179	Selleck	100% DMSO	469.949	10	25	-20°C	LY2784544	C23H25ClFN7O	3-(4-chloro-2-fluorobenzyl)-2-methyl-N-(3-methyl-1H-pyrazol-5-yl)-8-(morpholinomethyl)imidazo[1,2-b]pyridazin-6-amine	C23H25ClFN7O	CC1=NNC(NC2=NN3C(C(CN4CCOCC4)=C2)=NC(C)=C3CC5=CC=C(Cl)C=C5F)=C1
125	Oncology Drugs Library_10mM	G07	G	07	F00020	Everolimus	mTORC1	E-4040	LC Laboratories	100% DMSO	958.24	10	25	-20°C	Everolimus	C53H83NO14	dihydroxy-12-[(2R)-1-[(1S,3R,4R)-4-(2-hydroxyethoxy)-3-methoxycyclohexyl]propan-2-yl]-19,30-dimethoxy-15,17,21,23,29,35-hexamethyl-11,36-dioxa-4-azatricyclo[30.3.1.04,9]hexatriaconta-16,24,26,28-tetraene-2,3,10,14,20-pentone	C53H83NO14	O=C(C(N1C(O)CCCC1C(OC([C@H](C)C[C@H]2C[C@@H](OC)[C@H](OCCO)CC2)CC(C(C)/C=C(C)/CC3OC)=O)=O)=O)C(O4)(O)C(C)CCC4CC(OC)/C(C)=C/C=C\C=C\C(C)CC(C)C3=O
126	Oncology Drugs Library_10mM	G08	G	08	F00103	KX2-391	Src kinase	S2700	Selleck	100% DMSO	431.536	10	25	-20°C	KX2-391	C26H29N3O3	N-benzyl-2-(5-(4-(2-morpholinoethoxy)phenyl)pyridin-2-yl)acetamide	C26H29N3O3	O=C(NCC1=CC=CC=C1)CC2=NC=C(C3=CC=C(OCCN4CCOCC4)C=C3)C=C2
127	Oncology Drugs Library_10mM	G09	G	09	F00028	XL880 (Foretinib)	cMET, VEGFR2	S1111	Selleck	100% DMSO	632.665	10	25	-20°C	XL880 (Foretinib)	C34H34F2N4O6	N-(3-fluoro-4-(6-methoxy-7-(3-morpholinopropoxy)quinolin-4-yloxy)phenyl)-N-(4-fluorophenyl)cyclopropane-1,1-dicarboxamide	C34H34F2N4O6	O=C(C1(C(N)=O)CC1)N(C2=CC=C(OC3=CC=NC4=CC(OCCCN5CCOCC5)=C(OC)C=C34)C(F)=C2)C6=CC=C(F)C=C6
128	Oncology Drugs Library_10mM	G10	G	10	F00111	LY2157299	TGF-βR	S2230	Selleck	100% DMSO	369.428	10	25	-20°C	LY2157299	C22H19N5O	4-(2-(6-methylpyridin-2-yl)-5,6-dihydro-4H-pyrrolo[1,2-b]pyrazol-3-yl)quinoline-6-carboxamide	C22H19N5O	O=C(C1=CC=C2N=CC=C(C3=C(CCC4)N4N=C3C5=NC(C)=CC=C5)C2=C1)N
129	Oncology Drugs Library_10mM	G11	G	11	F00036	MGCD-265	cMET, VEGFR1/2/3	S1361	Selleck	100% DMSO	517.597	10	25	-20°C	MGCD-265	C26H20FN5O2S2	N-(3-Fluoro-4-(2-(1-methyl-1H-imidazol-4-yl)thieno[3,2-b]pyridin-7-yloxy)phenylcarbamothioyl)-2-phenylacetamide	C26H20FN5O2S2	O=C(NC(NC1=CC=C(OC2=C3C(C=C(C4=CN(C)C=N4)S3)=NC=C2)C(F)=C1)=S)CC5=CC=CC=C5
130	Oncology Drugs Library_10mM	G12	G	12	F00123	PF 431396	FAK, PYK2	4278	Tocris Biosciences	100% DMSO	506.504	10	25	-20°C	PF 431396	C22H21F3N6O3S	N-Methyl-N-[2-[[[2-[(2,3-dihydro-2-oxo-1H-indol-5-yl)amino]-5-(trifluoromethyl)-4-pyrimidinyl]amino]methyl]phenyl]methanesulfonamide	C22H21F3N6O3S	CS(=O)(N(C)C1=CC=CC=C1CNC2=NC(NC3=CC4=C(NC(C4)=O)C=C3)=NC=C2C(F)(F)F)=O
131	Oncology Drugs Library_10mM	G13	G	13	F00044	Bimatoprost	prostaglandin analog	16820	Cayman Chemical Company	100% DMSO	415.574	10	25	-20°C	Bimatoprost	C25H37NO4	N-​ethyl-​9α,​11α,​15S-​trihydroxy-​17-​phenyl-​18,​19,​20-​trinor-​prosta-​5Z,​13E-​dien-​1-​amide	C25H37NO4	O=C(NCC)CCC/C=C\C[C@H]1[C@@H](O)C[C@@H](O)[C@@H]1/C=C/[C@@H](O)CCC2=CC=CC=C2
132	Oncology Drugs Library_10mM	G14	G	14	F00131	Goserelin acetate	LHRH agonist	3592	Tocris Biosciences	100% DMSO	1268.44	10	25	-20°C	Goserelin acetate	C60H85N17O14	N-(21-((1H-indol-3-yl)methyl)-1,1-diamino-12-(tert-butoxymethyl)-6-(2-(2-carbamoylhydrazinecarbonyl)cyclopentanecarbonyl)-15-(4-hydroxybenzyl)-18-(hydroxymethyl)-25-(1H-imidazol-5-yl)-9-isobutyl-8,11,14,17,20,23-hexaoxo-2,7,10,13,16,19,22-heptaazapentacos-1-en-24-yl)-5-oxopyrrolidine-2-carboxamide	C60H85N17O14	O=C(C(CC1)NC1=O)NC(CC2=CN=CN2)C(NC(CC3=CNC4=C3C=CC=C4)C(NC(CO)C(NC(CC5=CC=C(O)C=C5)C(NC(COC(C)(C)C)C(NC(CC(C)C)C(NC(C(C6C(C(NNC(N)=O)=O)CCC6)=O)CCCN=C(N)N)=O)=O)=O)=O)=O)=O
133	Oncology Drugs Library_10mM	G15	G	15	F00052	Dacomitinib (monohydrate) (PF-00299804)	HER family	CT-DACO	ChemieTek	100% DMSO	469.945	10	25	-20°C	Dacomitinib (monohydrate) (PF-00299804)	C24H25ClFN5O2	(E)-N-(4-((3-chloro-4-fluorophenyl)amino)-7-methoxyquinazolin-6-yl)-4-(piperidin-1-yl)but-2-enamide	C24H25ClFN5O2	O=C(NC1=CC2=C(NC3=CC=C(F)C(Cl)=C3)N=CN=C2C=C1OC)/C=C/CN4CCCCC4
134	Oncology Drugs Library_10mM	G16	G	16	F00172	Cisplatin aq	DNA crosslinking	P4394	Sigma-Aldrich	100% DMSO	300.046	10	25	-20°C	Cisplatin aq	Cl2H6N2Pt	cis-Dichlorodiammine platinum(II)	Cl2H6N2Pt	Cl[Pt]Cl.N.N
135	Oncology Drugs Library_10mM	G17	G	17	F00060	BMS-754807	IGF-1R	CT-BMS75	ChemieTek	100% DMSO	461.505	10	25	-20°C	BMS-754807	C23H24FN9O	(S)-1-(4-((5-cyclopropyl-1H-pyrazol-3-yl)amino)pyrrolo[2,1-f][1,2,4]triazin-2-yl)-N-(6-fluoropyridin-3-yl)-2-methylpyrrolidine-2-carboxamide	C23H24FN9O	O=C([C@@]1(C)N(C(N=C2NC3=NNC(C4CC4)=C3)=NN5C2=CC=C5)CCC1)NC6=CC=C(F)N=C6
136	Oncology Drugs Library_10mM	G18	G	18	F00186	Axitinib	multiple tyrosine kinases	A-1107	LC Laboratories	100% DMSO	386.473	10	25	-20°C	Axitinib	C22H18N4OS	N-methyl-2-[[3-[(1E)-2-(pyridin-2-yl)ethenyl]-1H-indazol-6-yl]sulfanyl]benzamide	C22H18N4OS	O=C(NC)C1=CC=CC=C1SC2=CC3=C(C=C2)C(/C=C/C4=NC=CC=C4)=NN3
137	Oncology Drugs Library_10mM	G19	G	19	F00068	INK128	mTORC1/2	CT-INK128	ChemieTek	100% DMSO	308.345	10	25	-20°C	INK128	C16H16N6O	1-isopropyl-3-(2-methylbenzo[d]oxazol-5-yl)-1H-pyrazolo[3,4-d]pyrimidin-4-amine	C16H16N6O	NC1=C2C(N(C(C)C)N=C2C3=CC=C(OC(C)=N4)C4=C3)=NC=N1
138	Oncology Drugs Library_10mM	G20	G	20	F00194	Nilutamide	androgen receptor	sc-203644	Santa Cruz Biotechnology	100% DMSO	317.224	10	25	-20°C	Nilutamide	C12H10F3N3O4	5,5-dimethyl-3-[4-nitro-3-(trifluoromethyl)phenyl]imidazolidine-2, 4-dione	C12H10F3N3O4	O=C1N(C2=CC=C([N+]([O-])=O)C(C(F)(F)F)=C2)C(C(C)(C)N1)=O
139	Oncology Drugs Library_10mM	G21	G	21	F00076	NVP-LDE225 (Diphosphate salt)	Smoothened	CT-LDE225	ChemieTek	100% DMSO	485.507	10	25	-20°C	NVP-LDE225 (Diphosphate salt)	C26H26F3N3O3	N-[6-[(2S,6R)-2,6-Dimethylmorpholin-4-yl]-3-pyridyl]-2-methyl-3-[4-(trifluoromethoxy)phenyl]benzamide	C26H26F3N3O3	O=C(NC1=CC=C(N2C[C@H](C)O[C@H](C)C2)N=C1)C3=CC=CC(C4=CC=C(OC(F)(F)F)C=C4)=C3C
140	Oncology Drugs Library_10mM	G22	G	22	F00202	Metformin hydrochloride aq	hepatic gluconeogenesis	2864	Tocris Biosciences	100% DMSO	165.625	10	25	-20°C	Metformin hydrochloride aq	C4H12ClN5	N,N-Dimethylimidodicarbonimidic diamide hydrochloride	C4H12ClN5	NC(NC(N(C)C)=N)=N.[H]Cl
141	Oncology Drugs Library_10mM	H03	H	03	F00210	Pravastatin	HMG-CoA reductase	2318	Tocris Biosciences	100% DMSO	424.534	10	25	-20°C	Pravastatin	C23H36O7	(3R,5R)-7-[(1S,2S,6S,8S,8aR)-6-hydroxy-2-methyl-8-{[(2S)-2-methylbutanoyl]oxy}-1,2,6,7,8,8a-hexahydronaphthalen-1-yl]-3,5-dihydroxyheptanoic acid	C23H36O7	O=C(O)C[C@H](O)C[C@H](O)CC[C@H]1[C@@H](C)C=CC2=C[C@@H](O)C[C@H](OC([C@@H](C)CC)=O)[C@]12[H]
142	Oncology Drugs Library_10mM	H04	H	04		Mercaptopurine	purine biosynthesis
143	Oncology Drugs Library_10mM	H05	H	05	F00218	Valproic acid	HDAC	P4543	Sigma-Aldrich	100% DMSO	166.196	10	25	-20°C	Valproic acid	C8H15NaO2	2-propylpentanoic acid sodium	C8H15NaO2	CCCC(CCC)C([O-])=O.[Na+]
144	Oncology Drugs Library_10mM	H06	H	06		Methoxsalen	DNA crosslinking
145	Oncology Drugs Library_10mM	H07	H	07	F00088	Olaparib	PARP	O-9201	LC Laboratories	100% DMSO	434.471	10	25	-20°C	Olaparib	C24H23FN4O3	4-[[3-[[4-(Cyclopropylcarbonyl)-1-piperazinyl]carbonyl]-4-fluorophenyl]methyl]-1(2H)-phthalazinone	C24H23FN4O3	O=C1NN=C(CC2=CC=C(F)C(C(N3CCN(C(C4CC4)=O)CC3)=O)=C2)C5=C1C=CC=C5
146	Oncology Drugs Library_10mM	H08	H	08		Streptozocin	DNA alkylation
147	Oncology Drugs Library_10mM	H09	H	09	F00142	CYT-387_Momelotinib	JAK1/2	CT-CYT387	ChemieTek	100% DMSO	414.469	10	25	-20°C	CYT-387	C23H22N6O2	N-(cyanomethyl)-4-(2-((4-morpholinophenyl)amino)pyrimidin-4-yl)benzamide	C23H22N6O2	O=C(NCC#N)C1=CC=C(C2=NC(NC3=CC=C(N4CCOCC4)C=C3)=NC=C2)C=C1
148	Oncology Drugs Library_10mM	H10	H	10		Mitomycin C	DNA crosslinking
149	Oncology Drugs Library_10mM	H11	H	11	F00150	Roscovitine_Selicilib	CDK2/7/9	R-1234	LC Laboratories	100% DMSO	354.458	10	25	-20°C	Roscovitine	C19H26N6O	6-Benzylamino-2[(R)-(1'-ethyl-2'-hydroxyethylamino)]-9-isopropylpurine	C19H26N6O	CC(N1C=NC2=C(NCC3=CC=CC=C3)N=C(N[C@H](CC)CO)N=C12)C
150	Oncology Drugs Library_10mM	H12	H	12		Carboplatin	DNA crosslinking
151	Oncology Drugs Library_10mM	H13	H	13	F00159	Amonafide	DNA topoisomerase II	S1367	Selleck	100% DMSO	283.331	10	25	-20°C	Amonafide	C16H17N3O2	1H-Benz[de]isoquinoline-1,3(2H)-dione, 5-amino-2-[2-(dimethylamino)ethyl]-	C16H17N3O2	O=C1N(CCN(C)C)C(C2=CC(N)=CC3=CC=CC1=C23)=O
152	Oncology Drugs Library_10mM	H14	H	14		Decitabine	DNA methyltransferase
153	Oncology Drugs Library_10mM	H15	H	15	F00167	Lomeguatrib	O6-methylguanine-DNA-methyl-transferase	4359	Tocris Biosciences	100% DMSO	326.172	10	25	-20°C	Lomeguatrib	C10H8BrN5OS	6-[(4-Bromo-2-thienyl)methoxy]-9H-purin-2-amine	C10H8BrN5OS	NC1=NC(OCC2=CC(Br)=CS2)=C3N=CNC3=N1
154	Oncology Drugs Library_10mM	H16	H	16		Fludarabine	DNA synthesis
155	Oncology Drugs Library_10mM	H17	H	17	F00177	Indibulin	tubulin	3728	Tocris Biosciences	100% DMSO	389.839	10	25	-20°C	Indibulin	C22H16ClN3O2	2-[1-(4-Chlorobenzyl)-1H-indol-3-yl]-2-oxo-N-pyridin-4-ylacetamide	C22H16ClN3O2	O=C(NC1=CC=NC=C1)C(C2=CN(CC3=CC=C(Cl)C=C3)C4=C2C=CC=C4)=O
156	Oncology Drugs Library_10mM	H18	H	18		Fulvestrant	selective estrogen receptor degrader
157	Oncology Drugs Library_10mM	H19	H	19		EMPTY
158	Oncology Drugs Library_10mM	H20	H	20		Ixabepilone	tubulin
159	Oncology Drugs Library_10mM	H21	H	21		EMPTY
160	Oncology Drugs Library_10mM	H22	H	22		Crizotinib	ALK, ROS1
161	Oncology Drugs Library_10mM	I03	I	03	F00005	Sotrastaurin	PKC	Axon 1635	Axon Medchem	100% DMSO	438.491	10	25	-20°C	Sotrastaurin	C25H22N6O2	3-(1H-indol-3-yl)-4-(2-(4-methylpiperazin-1-yl)quinazolin-4-yl)-1H-pyrrole-2,5-dione	C25H22N6O2	O=C(C(C1=CNC2=C1C=CC=C2)=C3C4=C5C=CC=CC5=NC(N6CCN(C)CC6)=N4)NC3=O
162	Oncology Drugs Library_10mM	I04	I	04	F00085	Panobinostat	HDAC	P-3703	LC Laboratories	100% DMSO	349.434	10	25	-20°C	Panobinostat	C21H23N3O2	(E)-N-hydroxy-3-[4-[[2-(2-methyl-1H-indol-3-yl)ethylamino]methyl]phenyl]prop-2-enamide	C21H23N3O2	O=C(NO)/C=C/C1=CC=C(CNCCC2=C(C)NC3=C2C=CC=C3)C=C1
163	Oncology Drugs Library_10mM	I05	I	05	F00013	ABT-199	Bcl-2	CT-A199	ChemieTek	100% DMSO	868.447	10	25	-20°C	ABT-199	C45H50ClN7O7S	4-(4-{[2-(4-chlorophenyl)-4,4-dimethylcyclohex-1-en-1-yl]methyl}piperazin-1-yl)-N-({3-nitro-4-[(tetrahydro-2H-pyran-4-ylmethyl)amino]phenyl}sulfonyl)-2-(1H-pyrrolo[2,3-b]pyridin-5-yloxy)benzamide	C45H50ClN7O7S	O=C(NS(=O)(C1=CC=C(NCC2CCOCC2)C([N+]([O-])=O)=C1)=O)C3=CC=C(N4CCN(CC5=C(C6=CC=C(Cl)C=C6)CC(C)(C)CC5)CC4)C=C3OC7=CN=C(NC=C8)C8=C7
164	Oncology Drugs Library_10mM	I06	I	06	F00096	AZD2014	mTORC1/2	S2783	Selleck	100% DMSO	462.554	10	25	-20°C	AZD2014	C25H30N6O3	3-(2,4-bis((S)-3-methylmorpholino)pyrido[2,3-d]pyrimidin-7-yl)-N-methylbenzamide	C25H30N6O3	O=C(NC)C1=CC=CC(C2=NC3=NC(N4[C@@H](C)COCC4)=NC(N5[C@@H](C)COCC5)=C3C=C2)=C1
165	Oncology Drugs Library_10mM	I07	I	07	F00021	PKC412_Midostaurin	protein kinases	P-7600	LC Laboratories	100% DMSO	569.641	10	25	-20°C	PKC412	C35H29N4O4	4'-N-Benzoyl Staurosporine	C35H29N4O4	O=C(N([C@H]1C[N@@]2([H])C=C3C1=C4C5=C6/C(C(C7=C6C8=CC=CC8=C35)=CCNC7=O)=C/C=N\[C@](O2)(C)[C@@H]4OC)C)C9=CC=CC=C9
166	Oncology Drugs Library_10mM	I08	I	08	F00104	AS703026_Pimasertib	MEK1/2	S1475	Selleck	100% DMSO	431.206	10	25	-20°C	AS703026	C15H15FIN3O3	(S)-N-(2,3-dihydroxypropyl)-3-(2-fluoro-4-iodophenylamino)isonicotinamide	C15H15FIN3O3	O=C(NC[C@H](O)CO)C1=CC=NC=C1NC2=CC=C(I)C=C2F
167	Oncology Drugs Library_10mM	I09	I	09	F00029	LY2228820 (CP868569)	p38 MAPK	S1494	Selleck	100% DMSO	612.736	10	25	-20°C	LY2228820 (CP868569)	C26H37FN6O6S2	5-(2-tert-butyl-4-(4-fluorophenyl)-1H-imidazol-5-yl)-3-neopentyl-3H-imidazo[4,5-b]pyridin-2-amine dimethanesulfonate	C26H37FN6O6S2	NC1=NC2=CC=C(C3=C(C4=CC=C(F)C=C4)N=C(C(C)(C)C)N3)N=C2N1CC(C)(C)C.CS(=O)(O)=O.CS(=O)(O)=O
168	Oncology Drugs Library_10mM	I10	I	10	F00112	JNJ 26854165 (Serdemetan)	MDM2	S1172	Selleck	100% DMSO	328.419	10	25	-20°C	JNJ 26854165 (Serdemetan)	C21H20N4	N1-(2-(1H-indol-3-yl)ethyl)-N4-(pyridin-4-yl)benzene-1,4-diamine	C21H20N4	C1(NCCC2=CNC3=C2C=CC=C3)=CC=C(NC4=CC=NC=C4)C=C1
169	Oncology Drugs Library_10mM	I11	I	11	F00037	TAK-901	Aurora kinases	S2718	Selleck	100% DMSO	504.649	10	25	-20°C	TAK-901	C28H32N4O3S	5-(3-(ethylsulfonyl)phenyl)-3,8-dimethyl-N-(1-methylpiperidin-4-yl)-9H-pyrido[2,3-b]indole-7-carboxamide	C28H32N4O3S	O=C(C1=C(C)C2=C(C(C3=CC=CC(S(=O)(CC)=O)=C3)=C1)C4=CC(C)=CN=C4N2)NC5CCN(C)CC5
170	Oncology Drugs Library_10mM	I12	I	12	F00124	AZ 3146	Mps1 kinase	3994	Tocris Biosciences	100% DMSO	452.559	10	25	-20°C	AZ 3146	C24H32N6O3	9-Cyclopentyl-2-[[2-methoxy-4-[(1-methylpiperidin-4-yl)oxy]-phenyl]amino]-7-methyl-7,9-dihydro-8H-purin-8-one	C24H32N6O3	O=C1N(C)C2=CN=C(NC3=CC=C(OC4CCN(C)CC4)C=C3OC)N=C2N1C5CCCC5
171	Oncology Drugs Library_10mM	I13	I	13	F00045	2-methoxyestradiol (Panzem)	angiogenesis inhibitor	13021	Cayman Chemical Company	100% DMSO	302.414	10	25	-20°C	2-methoxyestradiol (Panzem)	C19H26O3	2-​methoxy-​estra-​1,​3,​5(10)-​triene-​3,​17β-​diol	C19H26O3	OC(C(OC)=C1)=CC2=C1[C@@]3([H])CC[C@]4(C)[C@@H](O)CC[C@@]4([H])[C@]3([H])CC2
172	Oncology Drugs Library_10mM	I14	I	14	F00132	Doxorubicin	DNA synthesis	D1515	Sigma-Aldrich	100% DMSO	579.983	10	25	-20°C	Doxorubicin	C27H30ClNO11	(8S,10S)-10-((2R,4S,5S,6S)-4-amino-5-hydroxy-6-methyl-tetrahydro-2H-pyran-2-yloxy)-6,8,11-trihydroxy-8-(2-hydroxyacetyl)-1-methoxy-7,8,9,10-tetrahydrotetracene-5,12-dione hydrochloride	C27H30ClNO11	O=C1C2=C(O)C(C[C@](C(CO)=O)(O)C[C@@H]3O[C@H]4C[C@H](N)[C@H](O)[C@H](C)O4)=C3C(O)=C2C(C5=C1C=CC=C5OC)=O.[H]Cl
173	Oncology Drugs Library_10mM	I15	I	15	F00053	EMD1214063	c-Met	CT-EMD063	ChemieTek	100% DMSO	492.583	10	25	-20°C	EMD1214063	C29H28N6O2	3-(1-(3-(5-((1-methylpiperidin-4-yl)methoxy)pyrimidin-2-yl)benzyl)-1,6-dihydro-6-oxopyridazin-3-yl)benzonitrile	C29H28N6O2	N#CC1=CC=CC(C(C=C2)=NN(CC3=CC=CC(C4=NC=C(OCC5CCN(C)CC5)C=N4)=C3)C2=O)=C1
174	Oncology Drugs Library_10mM	I16	I	16	F00173	NVP-BEZ235_Dactolisib	mTOR, PI3K	N-4288	LC Laboratories	100% DMSO	469.548	10	25	-20°C	NVP-BEZ235	C30H23N5O	4-[2,3-Dihydro-3-methyl-2-oxo-8-(3-quinolinyl)-1H-imidazo[4,5-c]quinolin-1-yl]-α,α-dimethyl-benzeneacetonitrile	C30H23N5O	N#CC(C)(C)C1=CC=C(N(C2=C3C=NC4=CC=C(C5=CC6=CC=CC=C6N=C5)C=C24)C(N3C)=O)C=C1
175	Oncology Drugs Library_10mM	I17	I	17	F00061	GSK2636771	PI3K-β	CT-GSK263	ChemieTek	100% DMSO	433.431	10	25	-20°C	GSK2636771	C22H22F3N3O3	2-methyl-1-(2-methyl-3-(trifluoromethyl)benzyl)-6-morpholino-1H-benzo[d]imidazole-4-carboxylic acid	C22H22F3N3O3	O=C(C1=C2C(N(CC3=CC=CC(C(F)(F)F)=C3C)C(C)=N2)=CC(N4CCOCC4)=C1)O
176	Oncology Drugs Library_10mM	I18	I	18	F00187	Irinotecan	DNA topoisomerase I	I-4122	LC Laboratories	100% DMSO	586.689	10	25	-20°C	Irinotecan	C33H38N4O6	(S)-4,11-diethyl-3,4,12,14-tetrahydro-4-hydroxy-3,14-dioxo-1H-pyrano(3',4':6,7)indolizino(1,2-b)quinolin-9-yl-(1,4'-bipiperidine)-1'-carboxylic acid ester, hydrochloride salt, trihydrate	C33H38N4O6	O=C(N1CCC(N2C(C3=CC=C4N=C5C(CN6C(C(COC(C7CC)=O)=C7C=C65)=O)=C(CC)C4=C3)C[C@@H](O)CC2)CC1)O
177	Oncology Drugs Library_10mM	I19	I	19	F00069	INCB018424 (free base, Ruxolitinib)	JAK1/2	CT-INCB	ChemieTek	100% DMSO	306.373	10	25	-20°C	INCB018424 (free base, Ruxolitinib)	C17H18N6	(3R)-3-cyclopentyl-3-[4-(7H-pyrrolo[2,3-d]pyrimidin-4-yl)pyrazol-1-yl]propanenitrile	C17H18N6	N#CC[C@H](C1CCCC1)N2N=CC(C3=C4C(NC=C4)=NC=N3)=C2
178	Oncology Drugs Library_10mM	I20	I	20	F00195	AZD6244 (Selumetinib)	MEK1	S1008	Selleck	100% DMSO	457.684	10	25	-20°C	AZD6244 (Selumetinib)	C17H15BrClFN4O3	6-(4-bromo-2-chlorophenylamino)-7-fluoro-N-(2-hydroxyethoxy)-3-methyl-3H-benzo[d]imidazole-5-carboxamide	C17H15BrClFN4O3	O=C(C1=C(NC2=CC=C(Br)C=C2Cl)C(F)=C3N=CN(C)C3=C1)NOCCO
179	Oncology Drugs Library_10mM	I21	I	21	F00077	Atorvastatin Ca	HMG-CoA reductase	CT-ATOR	ChemieTek	100% DMSO	558.65	10	25	-20°C	Atorvastatin Ca	C33H35FN2O5	2-​(4-​fluorophenyl)-​βR,​δR-​dihydroxy-​5-​(1-​methylethyl)-​3-​phenyl-​4-​[(phenylamino)carbonyl]-​1H-​pyrrole-​1-​heptanoic acid	C33H35FN2O5	O=C(O)C[C@H](O)C[C@H](O)CCN1C(C2=CC=C(F)C=C2)=C(C3=CC=CC=C3)C(C(NC4=CC=CC=C4)=O)=C1C(C)C
180	Oncology Drugs Library_10mM	I22	I	22	F00203	S-trityl-L-cysteine, 40 mM	mitotic kinesin Eg5	ALX-105-011	Enzo Life Sciences	100% DMSO	363.475	10	25	-20°C	S-trityl-L-cysteine, 40 mM	C22H21NO2S	S-(Triphenylmethyl)-L-cysteine	C22H21NO2S	N[C@@H](CSC(C1=CC=CC=C1)(C2=CC=CC=C2)C3=CC=CC=C3)C(O)=O
181	Oncology Drugs Library_10mM	J03	J	03	F00211	Prednisolone	glucoocorticoid receptors	sc-205815	Santa Cruz Biotechnology	100% DMSO	360.45	10	25	-20°C	Prednisolone	C21H28O5	(8S,9S,10R,11S,13S,14S,17R)-11,17-dihydroxy-17-(2-hydroxyacetyl)-10, 13-dimethyl-7,8,9,11,12,14,15, 16-octahydro-6H-cyclopenta[a]phenanthren-3-one	C21H28O5	O=C1C=C[C@]2(C)[C@@]3([H])[C@@H](O)C[C@]4(C)[C@](C(CO)=O)(O)CC[C@@]4([H])[C@]3([H])CCC2=C1
182	Oncology Drugs Library_10mM	J04	J	04		Nitrogen mustard	DNA alkylation
183	Oncology Drugs Library_10mM	J05	J	05	F00219	Chloroquine diphosphate	antimalarial drug	C6628	Sigma-Aldrich	100% DMSO	469.796	10	25	-20°C	Chloroquine diphosphate	C16H26ClN3O7P2	N4-(7-Chloro-4-quinolinyl)-N1,N1-dimethyl-1,4-pentanediamine diphosphate salt	C16H26ClN3O7P2	CC(NC1=CC=NC2=CC(Cl)=CC=C12)CCCN(C)C.O=P(O)(OP(O)(O)=O)O
184	Oncology Drugs Library_10mM	J06	J	06		Lomustine, CCNU	DNA alkylation
185	Oncology Drugs Library_10mM	J07	J	07	F00089	Vismodegib	Smoothened	V-4050	LC Laboratories	100% DMSO	421.292	10	25	-20°C	Vismodegib	C19H14Cl2N2O3S	2-Chloro-N-(4-chloro-3-(2-pyridyl)phenyl)-4-(methylsulfonyl)benzamide	C19H14Cl2N2O3S	O=C(NC1=CC=C(Cl)C(C2=NC=CC=C2)=C1)C3=CC=C(S(=O)(C)=O)C=C3Cl
186	Oncology Drugs Library_10mM	J08	J	08		Cladribine	adenosine deaminase
187	Oncology Drugs Library_10mM	J09	J	09	F00143	OSI-906_Linsitinib	IGF-1R	CT-O906	ChemieTek	100% DMSO	421.504	10	25	-20°C	OSI-906	C26H23N5O	(1r,3r)-3-(8-amino-1-(2-phenylquinolin-7-yl)imidazo[1,5-a]pyrazin-3-yl)-1-methylcyclobutanol	C26H23N5O	O[C@@]1(C)C[C@H](C2=NC(C3=CC=C4C=CC(C5=CC=CC=C5)=NC4=C3)=C6C(N)=NC=CN62)C1
188	Oncology Drugs Library_10mM	J10	J	10		Mitotane	adrenal hormone production
189	Oncology Drugs Library_10mM	J11	J	11	F00151	Tasocitinib_Tofacitinib	JAK1/3	T-1377	LC Laboratories	100% DMSO	312.377	10	25	-20°C	Tasocitinib	C16H20N6O	3-((3R,4R)-4-methyl-3-(methyl(7H-pyrrolo[2,3-d]pyrimidin-4-yl)amino)piperidin-1-yl)-3-oxopropanenitrile	C16H20N6O	N#CCC(N1C[C@H](N(C)C2=C3C(NC=C3)=NC=N2)[C@H](C)CC1)=O
190	Oncology Drugs Library_10mM	J12	J	12		Oxaliplatin	DNA crosslinking
191	Oncology Drugs Library_10mM	J13	J	13	F00160	17-DMAG (Alvespimycin)	HSP90	S1142	Selleck	100% DMSO	616.756	10	25	-20°C	17-DMAG (Alvespimycin)	C32H48N4O8	[(3R,5S,6R,7S,8E,10S,11S,12Z,14E)-21-(2-dimethylaminoethylamino)-6-hydroxy-5,11-dimethoxy-3,7,9,15-tetramethyl-16,20,22-trioxo-17-azabicyclo[16.3.1]docosa-1(21),8,12,14,18-pentaen-10-yl] carbamate	C32H48N4O8	NC(O[C@H]([C@@H](OC)/C=C\C=C(C)\C(NC1=C2)=O)/C(C)=C/[C@H](C)[C@@H](O)[C@@H](OC)C[C@H](C)CC(C1=O)=C(NCCN(C)C)C2=O)=O
192	Oncology Drugs Library_10mM	J14	J	14		Amifostine	detoxification of reactive metabolites of platinum and alkylating agents
193	Oncology Drugs Library_10mM	J15	J	15	F00168	Stattic	Stat3	2798	Tocris Biosciences	100% DMSO	211.191	10	25	-20°C	Stattic	C8H5NO4S	6-Nitrobenzo[b]thiophene 1,1-dioxide	C8H5NO4S	O=[N+](C1=CC=C(C=CS2(=O)=O)C2=C1)[O-]
194	Oncology Drugs Library_10mM	J16	J	16		Bortezomib	26S proteasome
195	Oncology Drugs Library_10mM	J17	J	17	F00178	Vatalanib	VEGFR1/2/3	V-8303	LC Laboratories	100% DMSO	419.734	10	25	-20°C	Vatalanib	C20H17Cl3N4	N-(4-Chlorophenyl)-4-(pyridin-4-ylmethyl)phthalazin-1-amine Dihydrochloride	C20H17Cl3N4	ClC1=CC=C(NC2=NN=C(CC3=CC=NC=C3)C4=C2C=CC=C4)C=C1.[H]Cl.[H]Cl
196	Oncology Drugs Library_10mM	J18	J	18		Plicamycin	RNA synthesis
197	Oncology Drugs Library_10mM	J19	J	19		EMPTY
198	Oncology Drugs Library_10mM	J20	J	20		Doxorubicin HCl	DNA intercalator
199	Oncology Drugs Library_10mM	J21	J	21		EMPTY
200	Oncology Drugs Library_10mM	J22	J	22		EMPTY
201	Oncology Drugs Library_10mM	K03	K	03	F00006	AG-014699_Rucaparib	PARP1/2	Axon 1529	Axon Medchem	100% DMSO	421.365	10	25	-20°C	AG-014699	C19H21FN3O5P	8-Fluoro-2-(4-methylaminomethyl-phenyl)-1,3,4,5-tetrahydro-azepino[5,4,3-cd]indol-6-one phosphate	C19H21FN3O5P	O=C1NCCC2=C(C3=CC=C(CNC)C=C3)NC4=C2C1=CC(F)=C4.O=P(O)(O)O
202	Oncology Drugs Library_10mM	K04	K	04	F00086	Canertinib	EGFR, HER-2, ErbB-4	C-1201	LC Laboratories	100% DMSO	558.86	10	25	-20°C	Canertinib	C24H27Cl3FN5O3	N-[4-[(3-Chloro-4-fluorophenyl)amino]-7-[3-(4-morpholinyl)propoxy]-6-quinazolinyl]-2-propenamide Dihydrochloride	C24H27Cl3FN5O3	C=CC(NC1=CC2=C(NC3=CC=C(F)C(Cl)=C3)N=CN=C2C=C1OCCCN4CCOCC4)=O.[H]Cl.[H]Cl
203	Oncology Drugs Library_10mM	K05	K	05	F00014	Tubacin	HDAC6	CT-TUCN	ChemieTek	100% DMSO	721.869	10	25	-20°C	Tubacin	C41H43N3O7S	N1-(4-((2R,4R,6S)-4-(((4,5-diphenyloxazol-2-yl)thio)methyl)-6-(4-(hydroxymethyl)phenyl)-1,3-dioxan-2-yl)phenyl)-N8-hydroxyoctanediamide	C41H43N3O7S	O=C(NC1=CC=C([C@@H]2O[C@H](C3=CC=C(CO)C=C3)C[C@H](CSC4=NC(C5=CC=CC=C5)=C(C6=CC=CC=C6)O4)O2)C=C1)CCCCCCC(NO)=O
204	Oncology Drugs Library_10mM	K06	K	06	F00097	PF-2341066 (Crizotinib)	ALK, c-Met	S1068	Selleck	100% DMSO	450.339	10	25	-20°C	PF-2341066 (Crizotinib)	C21H22Cl2FN5O	3-((R)-1-(2,6-dichloro-3-fluorophenyl)ethoxy)-5-(1-(piperidin-4-yl)-1H-pyrazol-4-yl)pyridin-2-amine	C21H22Cl2FN5O	NC1=NC=C(C2=CN(C3CCNCC3)N=C2)C=C1O[C@@H](C4=C(Cl)C=CC(F)=C4Cl)C
205	Oncology Drugs Library_10mM	K07	K	07	F00022	Homoharringtonine	protein synthesis	sc-202652	Santa Cruz Biotechnology	100% DMSO	247.268	10	25	-20°C	Homoharringtonine	C11H19O6-	4-methyl 2-hydroxy-2-(4-hydroxy-4-methylpentyl)butanedioate (ester), [3(R)]-	C11H19O6-	O=C([O-])[C@](CCCC(C)(O)C)(O)CC(OC)=O
206	Oncology Drugs Library_10mM	K08	K	08	F00105	Obatoclax Mesylate (GX15-070)	Bcl-2 family	S1057	Selleck	100% DMSO	413.492	10	25	-20°C	Obatoclax Mesylate (GX15-070)	C21H23N3O4S	(Z)-2-(5-((3,5-dimethyl-1H-pyrrol-2-yl)methylene)-4-methoxy-5H-pyrrol-2-yl)-1H-indole mesylate	C21H23N3O4S	COC1=CC(C(N2)=CC3=C2C=CC=C3)=N/C1=C\C4=C(C)C=C(C)N4.OS(=O)(C)=O
207	Oncology Drugs Library_10mM	K09	K	09	F00030	Nutlin-3	MDM2	S1061	Selleck	100% DMSO	581.494	10	25	-20°C	Nutlin-3	C30H30Cl2N4O4	4-(4,5-bis(4-chlorophenyl)-2-(2-isopropoxy-4-methoxyphenyl)-4,5-dihydro-1H-imidazole-1-carbonyl)piperazin-2-one	C30H30Cl2N4O4	O=C1NCCN(C(N2C(C3=CC=C(Cl)C=C3)C(C4=CC=C(Cl)C=C4)N=C2C5=CC=C(OC)C=C5OC(C)C)=O)C1
208	Oncology Drugs Library_10mM	K10	K	10	F00113	BIIB021	HSP90	S1175	Selleck	100% DMSO	318.765	10	25	-20°C	BIIB021	C14H15ClN6O	6-chloro-9-((4-methoxy-3,5-dimethylpyridin-2-yl)methyl)-9H-purin-2-amine	C14H15ClN6O	NC1=NC(Cl)=C2N=CN(CC3=NC=C(C)C(OC)=C3C)C2=N1
209	Oncology Drugs Library_10mM	K11	K	11	F00038	TAK-733	MEK1/2	S2617	Selleck	100% DMSO	504.232	10	25	-20°C	TAK-733	C17H15F2IN4O4	(R)-3-(2,3-dihydroxypropyl)-6-fluoro-5-(2-fluoro-4-iodophenylamino)-8-methylpyrido[2,3-d]pyrimidine-4,7(3H,8H)-dione	C17H15F2IN4O4	O=C1C(C(NC2=CC=C(I)C=C2F)=C(F)C(N3C)=O)=C3N=CN1C[C@@H](O)CO
210	Oncology Drugs Library_10mM	K12	K	12	F00125	PF670462	CK1ε, CK1δ	3316	Tocris Biosciences	100% DMSO	410.318	10	25	-20°C	PF670462	C19H22Cl2FN5	4-[1-Cyclohexyl-4-(4-fluorophenyl)-1H-imidazol-5-yl]-2-pyrimidinamine dihydrochloride	C19H22Cl2FN5	NC1=NC=CC(C2=C(C3=CC=C(F)C=C3)N=CN2C4CCCCC4)=N1.[H]Cl.[H]Cl
211	Oncology Drugs Library_10mM	K13	K	13	F00046	DCC-2036_Rebastinib	Bcr-Abl	CT-DCC20	ChemieTek	100% DMSO	553.598	10	25	-20°C	DCC-2036	C30H28FN7O3	N-[3-tert-Butyl-1-(quinolin-6-yl)-1H-pyrazol-5-yl]-N'-[2-fluoro-4-[(2-(methylcarbamoyl)pyridin-4-yl)oxy]phenyl]urea	C30H28FN7O3	O=C(NC1=CC=C(OC2=CC(C(NC)=O)=NC=C2)C=C1F)NC3=CC(C(C)(C)C)=NN3C4=CC=C5N=CC=CC5=C4
212	Oncology Drugs Library_10mM	K14	K	14	F00133	Idarubicin HCl	DNA topoisomerase II	I1656	Sigma-Aldrich	100% DMSO	533.958	10	25	-20°C	Idarubicin HCl	C26H28ClNO9	(7S,9S)-9-acetyl-7-((2R,4S,5S,6S)-4-amino-5-hydroxy-6-methyl-tetrahydro-2H-pyran-2-yloxy)-6,9,11-trihydroxy-7,8,9,10-tetrahydrotetracene-5,12-dione hydrochloride	C26H28ClNO9	O=C1C2=C(O)C([C@@H](O[C@H]3C[C@H](N)[C@H](O)[C@H](C)O3)C[C@](O)(C(C)=O)C4)=C4C(O)=C2C(C5=C1C=CC=C5)=O.[H]Cl
213	Oncology Drugs Library_10mM	K15	K	15	F00054	XL184_Cabozantinib	c-Met, VEGFR2	CT-XL184	ChemieTek	100% DMSO	501.514	10	25	-20°C	XL184	C28H24FN3O5	N-{4-[(6,7-dimethoxyquinolin-4-yl)oxy]phenyl}-N'-(4-fluorophenyl)cyclopropane-1,1- dicarboxamide	C28H24FN3O5	O=C(C1(C(NC2=CC=C(F)C=C2)=O)CC1)NC3=CC=C(OC4=CC=NC5=CC(OC)=C(OC)C=C45)C=C3
214	Oncology Drugs Library_10mM	K16	K	16	F00180	Simvastatin	HMG-CoA reductase	S6196	Sigma-Aldrich	100% DMSO	418.574	10	25	-20°C	Simvastatin	C25H38O5	Butanoic acid,2,2-dimethyl-,(1S,3R,7S,8S,- 8aR)-1,2,3,7,8,8a-hexahydro-3,7-dimethyl-8- [2-[(2R,4R)-tetrahydro-4-hydroxy-6-oxo- 2H-pyran-2-yl]ethyl]-1-naphthalenyl ester	C25H38O5	CCC(C)(C)C(O[C@H]1C[C@@H](C)C=C2C=C[C@H](C)[C@H](CC[C@@H]3C[C@@H](O)CC(O3)=O)[C@@]12[H])=O
215	Oncology Drugs Library_10mM	K17	K	17	F00062	MLN4924	NEDD8-activating enzyme	CT-M4924	ChemieTek	100% DMSO	443.522	10	25	-20°C	MLN4924	C21H25N5O4S	((1S,2S,4R)-4-(4-(((S)-2,3-dihydro-1H-inden-1-yl)amino)-7H-pyrrolo[2,3-d]pyrimidin-7-yl)-2-hydroxycyclopentyl)methyl sulfamate	C21H25N5O4S	O=S(OC[C@H]1[C@@H](O)C[C@H](N2C=CC3=C(N[C@H]4CCC5=C4C=CC=C5)N=CN=C32)C1)(N)=O
216	Oncology Drugs Library_10mM	K18	K	18	F00188	CI-994_Tacedinaline	HDAC1/2/3	C-2606	LC Laboratories	100% DMSO	269.304	10	25	-20°C	CI-994	C15H15N3O2	4-(Acetylamino)-N-(2-aminophenyl)benzamide	C15H15N3O2	O=C(NC1=CC=CC=C1N)C2=CC=C(NC(C)=O)C=C2
217	Oncology Drugs Library_10mM	K19	K	19	F00070	Dabrafenib Mesylate	B-Raf	CT-DABR	ChemieTek	100% DMSO	615.661	10	25	-20°C	Dabrafenib Mesylate	C24H24F3N5O5S3	N-(3-(5-(2-aminopyrimidin-4-yl)-2-(tert-butyl)thiazol-4-yl)-2-fluorophenyl)-2,6-difluorobenzenesulfonamide methanesulfonate	C24H24F3N5O5S3	O=S(C1=C(F)C=CC=C1F)(NC2=CC=CC(C3=C(C4=NC(N)=NC=C4)SC(C(C)(C)C)=N3)=C2F)=O.CS(=O)(O)=O
218	Oncology Drugs Library_10mM	K20	K	20	F00196	Abitrexate/Methotrexate	dihydrofolate reductase (thymidine biosynthesis)	S1210	Selleck	100% DMSO	454.447	10	25	-20°C	Abitrexate	C20H22N8O5	(2S)-2-[(4-{[(2,4-diaminopteridin-6-yl)methyl](methyl)amino}benzoyl)amino]pentanedioic acid	C20H22N8O5	O=C(O)[C@@H](NC(C1=CC=C(N(CC2=NC3=C(N)N=C(N)N=C3N=C2)C)C=C1)=O)CCC(O)=O
219	Oncology Drugs Library_10mM	K21	K	21	F00078	NVP-AUY922	HSP90	CT-AUY922	ChemieTek	100% DMSO	465.55	10	25	-20°C	NVP-AUY922	C26H31N3O5	5-(2,4-dihydroxy-5-isopropylphenyl)-N-ethyl-4-(4-(morpholinomethyl)phenyl)isoxazole-3-carboxamide	C26H31N3O5	O=C(C1=NOC(C2=CC(C(C)C)=C(O)C=C2O)=C1C3=CC=C(CN4CCOCC4)C=C3)NCC
220	Oncology Drugs Library_10mM	K22	K	22	F00204	Vorinostat	HDAC	V-8477	LC Laboratories	100% DMSO	264.325	10	25	-20°C	Vorinostat	C14H20N2O3	N-Hydroxy-N'-phenyloctanediamide	C14H20N2O3	O=C(NO)CCCCCCC(NC1=CC=CC=C1)=O
221	Oncology Drugs Library_10mM	L03	L	03	F00212	Deferoxamine mesylate	iron metabolism (increases renal elimination)	D9533	Sigma-Aldrich	100% DMSO	656.793	10	25	-20°C	Deferoxamine mesylate	C26H52N6O11S	Butanediamide,N'-[5-[[4-[[5-(acetylhydroxyamino) pentyl]amino]-1,4-dioxobutyl]hydroxyamino] pentyl]-N-(5-aminopentyl)-Nhydroxy-,monomethanesulfonate (salt)	C26H52N6O11S	CC(N(CCCCCNC(CCC(N(CCCCCNC(CCC(N(CCCCCN)O)=O)=O)O)=O)=O)O)=O.OS(=O)(C)=O
222	Oncology Drugs Library_10mM	L04	L	04		Thiotepa	DNA alkylation
223	Oncology Drugs Library_10mM	L05	L	05	F00220	Methylprednisolone	glucocorticoid agonist	sc-205749	Santa Cruz Biotechnology	100% DMSO	374.477	10	25	-20°C	Methylprednisolone	C22H30O5	Pregna-1,4-diene-3,20-dione,11b,17,21-trihydroxy-6a-methyl- (7CI,8CI);11b,17,21-Trihydroxy-6a-methylpregna-1,4-diene-3,20-dione;6a-Methyl-11b,17a,21b-trihydroxy-1,4-pregnadiene-3,20-dione	C22H30O5	C[C@@]12[C@](C(CO)=O)(O)CC[C@@]1([H])[C@]3([H])C[C@H](C)C4=CC(C=C[C@]4(C)[C@@]3([H])[C@@H](O)C2)=O
224	Oncology Drugs Library_10mM	L06	L	06		Carmustine	DNA crosslinking
225	Oncology Drugs Library_10mM	L07	L	07	F00114	AP24534 (Ponatinib)	Bcr-Abl	S1490	Selleck	100% DMSO	532.571	10	25	-20°C	AP24534 (Ponatinib)	C29H27F3N6O	3-(2-(imidazo[1,2-b]pyridazin-3-yl)ethynyl)-4-methyl-N-(4-((4-methylpiperazin-1-yl)methyl)-3-(trifluoromethyl)phenyl)benzamide	C29H27F3N6O	O=C(NC1=CC=C(CN2CCN(C)CC2)C(C(F)(F)F)=C1)C3=CC=C(C)C(C#CC4=CN=C5C=CC=NN54)=C3
226	Oncology Drugs Library_10mM	L08	L	08		Ifosfamide	DNA alkylation
227	Oncology Drugs Library_10mM	L09	L	09	F00144	CAL-101	PI3K-p110δ	CT-CAL101	ChemieTek	100% DMSO	415.432	10	25	-20°C	CAL-101	C22H18FN7O	(S)-2-(1-((9H-purin-6-yl)amino)propyl)-5-fluoro-3-phenylquinazolin-4(3H)-one	C22H18FN7O	O=C1N(C2=CC=CC=C2)C([C@@H](NC3=C4N=CNC4=NC=N3)CC)=NC5=C1C(F)=CC=C5
228	Oncology Drugs Library_10mM	L10	L	10		Daunorubicin HCl	DNA intercalator
229	Oncology Drugs Library_10mM	L11	L	11	F00152	Bosutinib	Bcr-Abl, SRc family kinases	B-1788	LC Laboratories	100% DMSO	530.45	10	25	-20°C	Bosutinib	C26H29Cl2N5O3	4-[(2,4-dichloro-5-methoxyphenyl)amino]-6-methoxy-7-[3-(4-methylpiperazin-1-yl)propoxy]quinoline-3-carbonitrile	C26H29Cl2N5O3	N#CC1=C(NC2=CC(OC)=C(Cl)C=C2Cl)C3=CC(OC)=C(OCCCN4CCN(C)CC4)C=C3N=C1
230	Oncology Drugs Library_10mM	L12	L	12		Methotrexate	dihydrofolate reductase (thymidine biosynthesis)
231	Oncology Drugs Library_10mM	L13	L	13	F00161	ABT-888 (Veliparib)	PARP1/2	S1004	Selleck	100% DMSO	244.298	10	25	-20°C	ABT-888 (Veliparib)	C13H16N4O	(R)-2-(2-methylpyrrolidin-2-yl)-1H-benzo[d]imidazole-4-carboxamide	C13H16N4O	O=C(C1=C2C(NC([C@]3(C)NCCC3)=N2)=CC=C1)N
232	Oncology Drugs Library_10mM	L14	L	14		Exemestane	aromatase (estrogen biosynthesis)
233	Oncology Drugs Library_10mM	L15	L	15	F00169	Belinostat (PXD101)	HDAC	CT-BELI	ChemieTek	100% DMSO	318.347	10	25	-20°C	Belinostat (PXD101)	C15H14N2O4S	(E)-N-hydroxy-3-(3-(N-phenylsulfamoyl)phenyl)acrylamide	C15H14N2O4S	O=C(NO)/C=C/C1=CC=CC(S(=O)(NC2=CC=CC=C2)=O)=C1
234	Oncology Drugs Library_10mM	L16	L	16		Celecoxib	NSAID
235	Oncology Drugs Library_10mM	L17	L	17	F00179	ZSTK474	PI3K	Z-1066	LC Laboratories	100% DMSO	417.421	10	25	-20°C	ZSTK474	C19H21F2N7O2	2-(2-Difluoromethylbenzimidazol-1-yl)-4,6-dimorpholino-1,3,5-triazine	C19H21F2N7O2	FC(C1=NC2=CC=CC=C2N1C3=NC(N4CCOCC4)=NC(N5CCOCC5)=N3)F
236	Oncology Drugs Library_10mM	L18	L	18		Vinblastine sulfate	tubulin
237	Oncology Drugs Library_10mM	L19	L	19		EMPTY
238	Oncology Drugs Library_10mM	L20	L	20		Bendamustine HCl	DNA alkylation
239	Oncology Drugs Library_10mM	L21	L	21		EMPTY
240	Oncology Drugs Library_10mM	L22	L	22		EMPTY
241	Oncology Drugs Library_10mM	M03	M	03	F00007	PF 477736	Chk1	Axon 1379	Axon Medchem	100% DMSO	419.489	10	25	-20°C	PF 477736	C22H25N7O2	(R)-2-Amino-2-cyclohexyl-N-[2-(1-methyl-1H-pyrazol-4-yl)-6-oxo-5,6-dihydro-1H-[1,2]diazepino[4,5,6-cd]indol-8-yl]-acetamide	C22H25N7O2	O=C(NC1=CC2=C(C3=C1)C(C=NNC3=O)=C(C4=CN(C)N=C4)N2)[C@H](N)C5CCCCC5
242	Oncology Drugs Library_10mM	M04	M	04	F00090	Lasofoxifene	androgen receptor	sc-211721	Santa Cruz Biotechnology	100% DMSO	413.561	10	25	-20°C	Lasofoxifene	C28H31NO2	2-Naphthalenol,5,6,7,8-tetrahydro-6-phenyl-5-[4-[2-(1-pyrrolidinyl)ethoxy]phenyl]-, (5R,6S)-	C28H31NO2	OC1=CC=C2[C@@H](C3=CC=C(OCCN4CCCC4)C=C3)[C@@H](C5=CC=CC=C5)CCC2=C1
243	Oncology Drugs Library_10mM	M05	M	05	F00015	Carfilzomib	20S proteasome	CT-CARF	ChemieTek	100% DMSO	719.924	10	25	-20°C	Carfilzomib	C40H57N5O7	(S)-4-methyl-N-((S)-1-((S)-4-methyl-1-((R)-2-methyloxiran-2-yl)-1-oxopentan-2-ylamino)-1-oxo-3-phenylpropan-2-yl)-2-((S)-2-(2-morpholinoacetamido)-4-phenylbutanamido)pentanamide	C40H57N5O7	CC(C)C[C@H](NC([C@@H](NC(CN1CCOCC1)=O)CCC2=CC=CC=C2)=O)C(N[C@@H](CC3=CC=CC=C3)C(N[C@@H](CC(C)C)C([C@]4(C)OC4)=O)=O)=O
244	Oncology Drugs Library_10mM	M06	M	06	F00098	Crenolanib	FLT3	S2730	Selleck	100% DMSO	443.551	10	25	-20°C	Crenolanib	C26H29N5O2	1-(2-(5-((3-methyloxetan-3-yl)methoxy)-1H-benzo[d]imidazol-1-yl)quinolin-8-yl)piperidin-4-amine	C26H29N5O2	NC1CCN(C2=C3N=C(N4C=NC5=CC(OCC6(C)COC6)=CC=C45)C=CC3=CC=C2)CC1
245	Oncology Drugs Library_10mM	M07	M	07	F00023	Toremifene citrate	estrogen receptor	sc-253712	Santa Cruz Biotechnology	100% DMSO	596.073	10	25	-20°C	Toremifene citrate	C32H34ClNO8	2-[4-[(Z)-4-chloro-1,2-diphenylbut-1-enyl]phenoxy]-N, N-dimethylethanamine;2-hydroxypropane-1,2,3-tricarboxylic acid	C32H34ClNO8	ClCC/C(C1=CC=CC=C1)=C(C2=CC=C(OCC(C(C(O)=O)C(C(O)=O)(O)CC(O)=O)N(C)C)C=C2)\C3=CC=CC=C3
246	Oncology Drugs Library_10mM	M08	M	08	F00106	Vincristine Sulfate (Oncovin)	tubulin	S1241	Selleck	100% DMSO	824.972	10	25	-20°C	Vincristine Sulfate (Oncovin)	C46H56N4O10	(3aR,3a1R,4R,5S,5aR,10bR)-methyl 4-acetoxy-3a-ethyl-9-((5S,7S,9S)-5-ethyl-5-hydroxy-9-(methoxycarbonyl)-2,4,5,6,7,8,9,10-octahydro-1H-3,7-methano[1]azacycloundecino[5,4-b]indol-9-yl)-6-formyl-5-hydroxy-8-methoxy-3a,3a1,4,5,5a,6,11,12-octahydro-1H-indolizino[8,1-cd]carbazole-5-carboxylate	C46H56N4O10	O=C([C@]1(O)[C@]2([H])N(C=O)C3=C(C=C([C@@]4(C(OC)=O)C[C@@]5([H])C[C@@](O)(CC)CN(C5)CCC6=C4NC7=C6C=CC=C7)C(OC)=C3)[C@]2(CCN8CC=C9)[C@]8([H])[C@]9(CC)[C@H]1OC(C)=O)OC
247	Oncology Drugs Library_10mM	M09	M	09	F00031	AT-406	TAK1	S2754	Selleck	100% DMSO	561.727	10	25	-20°C	AT-406	C32H43N5O4	(5S,8S,10aR)-N-benzhydryl-5-((S)-2-(methylamino)propanamido)-3-(3-methylbutanoyl)-6-oxo-decahydropyrrolo[1,2-a][1,5]diazocine-8-carboxamide	C32H43N5O4	O=C([C@@H]1CC[C@@](CCN(C(CC(C)C)=O)C[C@@H]2NC([C@@H](NC)C)=O)([H])N1C2=O)NC(C3=CC=CC=C3)C4=CC=CC=C4
248	Oncology Drugs Library_10mM	M10	M	10	F00118	UCN-01	CDK, PKC	U6508	Sigma-Aldrich	100% DMSO	483.548	10	25	-20°C	UCN-01	C28H27N4O4	9,13-Epoxy-1H,9H-diindolo[1,2,3-gh:3',2',1'-lm]pyrrolo[3,4-j][1,7]benzodiazonin-1-one,2,3,10,11,12,13-hexahydro-3-hydroxy-10-methoxy-9-methyl-11-(methylamino)-,(3R,9S,10R,11R,13R)-	C28H27N4O4	O=C(C[C@@H](O)C=C12)C1=C3C4=CN=CC4=C5C6=C3N2C/C=C\[C@@](O7)(C)[C@@H](OC)[N@@]6(NC)C8=C5C=C[C@@]7([H])C8
249	Oncology Drugs Library_10mM	M11	M	11	F00039	(5Z)-7-Oxozeaenol	TAK1	3604	Tocris Biosciences	100% DMSO	362.378	10	25	-20°C	(5Z)-7-Oxozeaenol	C19H22O7	(3S,5Z,8S,9S,11E)-3,4,9,10-tetrahydro-8,9,16-trihydroxy-14-methoxy-3-methyl-1H-2-benzoxacyclotetradecin-1,7(8H)-dione	C19H22O7	O=C(O[C@@H](C)C/C=C\1)C2=C(O)C=C(OC)C=C2/C=C/C[C@H](O)[C@H](O)C1=O
250	Oncology Drugs Library_10mM	M12	M	12	F00126	CHR 2797_Tosedostat	aminopeptidases	3595	Tocris Biosciences	100% DMSO	406.479	10	25	-20°C	CHR 2797	C21H30N2O6	α-[[(2R)-2-[(1S)-1-Hydroxy-2-(hydroxyamino)-2-oxoethyl]-4-methyl-1-oxopentyl]amino]-benzeneacetic acid cyclopently ester	C21H30N2O6	O=C(OC1CCCC1)C(NC([C@@H]([C@H](O)C(NO)=O)CC(C)C)=O)C2=CC=CC=C2
251	Oncology Drugs Library_10mM	M13	M	13	F00047	GDC-0980	mTOR, PI3K	CT-G0980	ChemieTek	100% DMSO	498.606	10	25	-20°C	GDC-0980	C23H30N8O3S	(S)-1-(4-((2-(2-aminopyrimidin-5-yl)-7-methyl-4-morpholinothieno[3,2-d]pyrimidin-6-yl)methyl)piperazin-1-yl)-2-hydroxypropan-1-one	C23H30N8O3S	C[C@H](O)C(N1CCN(CC2=C(C)C3=NC(C4=CN=C(N)N=C4)=NC(N5CCOCC5)=C3S2)CC1)=O
252	Oncology Drugs Library_10mM	M14	M	14	F00134	PD-0332991	CDK4/6	S1116	Selleck	100% DMSO	484.001	10	25	-20°C	PD-0332991	C24H30ClN7O2	6-acetyl-8-cyclopentyl-5-methyl-2-(5-(piperazin-1-yl)pyridin-2-ylamino)pyrido[2,3-d]pyrimidin-7(8H)-one hydrochloride	C24H30ClN7O2	O=C1C(C(C)=O)=C(C)C2=CN=C(NC3=NC=C(N4CCNCC4)C=C3)N=C2N1C5CCCC5.[H]Cl
253	Oncology Drugs Library_10mM	M15	M	15	F00055	MK-2206	Akt	CT-MK2206	ChemieTek	100% DMSO	482.409	10	25	-20°C	MK-2206	C25H25Cl2N5O	8-(4-(1-aminocyclobutyl)phenyl)-9-phenyl-8,9-dihydro-[1,2,4]triazolo[3,4-f][1,6]naphthyridin-3(2H)-one dihydrochloride	C25H25Cl2N5O	O=C1NN=C2C3=CC(C4=CC=CC=C4)C(C5=CC=C(C6(N)CCC6)C=C5)N=C3C=CN21.[H]Cl.[H]Cl
254	Oncology Drugs Library_10mM	M16	M	16	F00181	Anagrelide	phosphodiesterase III, platelet maturation	2432	Tocris Biosciences	100% DMSO	292.544	10	25	-20°C	Anagrelide	C10H8Cl3N3O	6,7-Dichloro-1,5-dihydroimidazo[2,1-b]quinazolin-2(3H)-one hydrochloride	C10H8Cl3N3O	O=C1NC2=NC3=C(C(Cl)=C(Cl)C=C3)CN2C1.[H]Cl
255	Oncology Drugs Library_10mM	M17	M	17	F00063	BMS-911543	JAK2	CT-BMS911	ChemieTek	100% DMSO	432.532	10	25	-20°C	BMS-911543	C23H28N8O	N,N-dicyclopropyl-4-((1,5-dimethyl-1H-pyrazol-3-yl)amino)-6-ethyl-1-methyl-1,6-dihydroimidazo[4,5-d]pyrrolo[2,3-b]pyridine-7-carboxamide	C23H28N8O	O=C(C1=CC2=C(N(C)C=N3)C3=C(NC4=NN(C)C(C)=C4)N=C2N1CC)N(C5CC5)C6CC6
256	Oncology Drugs Library_10mM	M18	M	18	F00189	Nilotinib	Bcr-Abl	N-8207	LC Laboratories	100% DMSO	529.527	10	25	-20°C	Nilotinib	C28H22F3N7O	4-methyl-N-[3-(4-methylimidazol-1-yl)-5-(trifluoromethyl)phenyl]-3-[(4-pyridin-3-ylpyrimidin-2-yl)amino]benzamide	C28H22F3N7O	O=C(NC1=CC(C(F)(F)F)=CC(N2C=C(C)N=C2)=C1)C3=CC=C(C)C(NC4=NC=CC(C5=CC=CN=C5)=N4)=C3
257	Oncology Drugs Library_10mM	M19	M	19	F00071	GSK1120212_Trametinib	MEK1/2	CT-GSK112	ChemieTek	100% DMSO	615.404	10	25	-20°C	GSK1120212	C26H23FIN5O4	N-[3-[3-Cyclopropyl-5-[(2-fluoro-4-iodophenyl)amino]-3,4,6,7-tetrahydro-6,8-dimethyl-2,4,7-trioxopyrido[4,3-d]pyrimidin-1(2H)-yl]phenyl]acetamide	C26H23FIN5O4	CC(NC1=CC=CC(N(C(C(C(N2C3CC3)=O)=C(NC4=CC=C(I)C=C4F)N5C)=C(C)C5=O)C2=O)=C1)=O
258	Oncology Drugs Library_10mM	M20	M	20	F00197	Clafen (Cyclophosphamide, Endoxan)	DNA crosslinking	S1217	Selleck	100% DMSO	261.083	10	25	-20°C	Clafen (Cyclophosphamide, Endoxan)	C7H15Cl2N2O2P	2-[Bis(2-chloroethyl)amino]tetrahydro-2H-1,3,2-oxazaphosphorin 2-oxide	C7H15Cl2N2O2P	ClCCN(P1(OCCCN1)=O)CCCl
259	Oncology Drugs Library_10mM	M21	M	21	F00079	ARRY-162_MEK-162	MEK1/2	CT-A162	ChemieTek	100% DMSO	441.233	10	25	-20°C	ARRY-162	C17H15BrF2N4O3	5-[(4-Bromo-2-fluorophenyl)amino]-4-fluoro-N-(2-hydroxyethoxy)-1-methyl-1H-benzimidazole-6-carboxamide	C17H15BrF2N4O3	O=C(C1=C(NC2=CC=C(Br)C=C2F)C(F)=C3N=CN(C)C3=C1)NOCCO
260	Oncology Drugs Library_10mM	M22	M	22	F00205	Gefitinib	EGFR	G-4408	LC Laboratories	100% DMSO	446.907	10	25	-20°C	Gefitinib	C22H24ClFN4O3	N-(3-chloro-4-fluoro-phenyl)-7-methoxy-6-(3-morpholin-4-ylpropoxy)quinazolin-4-amine	C22H24ClFN4O3	COC1=CC2=NC=NC(NC3=CC=C(F)C(Cl)=C3)=C2C=C1OCCCN4CCOCC4
261	Oncology Drugs Library_10mM	N03	N	03	F00213	Thio-TEPA	DNA crosslinking	T6069	Sigma-Aldrich	100% DMSO	189.217	10	25	-20°C	Thio-TEPA*	C6H12N3PS	1,1',1''-phosphorothioyltriaziridine	C6H12N3PS	S=P(N1CC1)(N2CC2)N3CC3
262	Oncology Drugs Library_10mM	N04	N	04		Aminolevulinic acid	photosensitizer
263	Oncology Drugs Library_10mM	N05	N	05	F00221	Melphalan	DNA crosslinking	M2011	Sigma-Aldrich	100% DMSO	305.199	10	25	-20°C	Melphalan	C13H18Cl2N2O2	4-[Bis(2-chloroethyl)amino]-L-phenylalanine	C13H18Cl2N2O2	N[C@@H](CC1=CC=C(N(CCCl)CCCl)C=C1)C(O)=O
264	Oncology Drugs Library_10mM	N06	N	06		Cyclophosphamide	DNA alkylation
265	Oncology Drugs Library_10mM	N07	N	07	F00115	Tipifarnib (Zarnestra)	Ras kinase	S1453	Selleck	100% DMSO	489.4	10	25	-20°C	Tipifarnib (Zarnestra)	C27H22Cl2N4O	(R)-6-(amino(4-chlorophenyl)(1-methyl-1H-imidazol-5-yl)methyl)-4-(3-chlorophenyl)-1-methylquinolin-2(1H)-one	C27H22Cl2N4O	O=C1N(C)C2=C(C=C([C@@](C3=CC=C(Cl)C=C3)(N)C4=CN=CN4C)C=C2)C(C5=CC=CC(Cl)=C5)=C1
266	Oncology Drugs Library_10mM	N08	N	08		Tretinoin	retinoic acid analog
267	Oncology Drugs Library_10mM	N09	N	09	F00145	Dinaciclib (SCH727965)	CDK1/2/5/9	CT-DINA	ChemieTek	100% DMSO	396.49	10	25	-20°C	Dinaciclib (SCH727965)	C21H28N6O2	(S)-3-(((3-ethyl-5-(2-(2-hydroxyethyl)piperidin-1-yl)pyrazolo[1,5-a]pyrimidin-7-yl)amino)methyl)pyridine 1-oxide	C21H28N6O2	CCC1=C2N=C(C=C(N2N=C1)NCC3=C[N+](=CC=C3)[O-])N4CCCC[C@H]4CCO
268	Oncology Drugs Library_10mM	N10	N	10		Etoposide	DNA topoisomerase II
269	Oncology Drugs Library_10mM	N11	N	11	F00153	GDC-0941_Pictilisib	PI3Kα/δ	G-9252	LC Laboratories	100% DMSO	513.635	10	25	-20°C	GDC-0941	C23H27N7O3S2	2-(1H-Indazol-4-yl)-6-(4-methanesulfonyl-piperazin-1-ylmethyl)-4-morpholin-4-yl-thieno[3,2-d]pyrimidine	C23H27N7O3S2	O=S(N1CCN(CC2=CC3=NC(C4=CC=CC5=C4C=NN5)=NC(N6CCOCC6)=C3S2)CC1)(C)=O
270	Oncology Drugs Library_10mM	N12	N	12		Acrichine	DNA intercalator (anti-malarial drug)
271	Oncology Drugs Library_10mM	N13	N	13	F00162	Decitabine (Dacogen)	DNA methyltransferase inhibitor, p53R2/RRM2B inducer	S1200	Selleck	100% DMSO	228.208	10	25	-20°C	Decitabine (Dacogen)	C8H12N4O4	4-amino-1-((2R,4S,5R)-4-hydroxy-5-(hydroxymethyl)-tetrahydrofuran-2-yl)-1,3,5-triazin-2(1H)-one	C8H12N4O4	O=C1N([C@@H]2O[C@H](CO)[C@@H](O)C2)C=NC(N)=N1
272	Oncology Drugs Library_10mM	N14	N	14		Anastrozole	aromatase (estrogen biosynthesis)
273	Oncology Drugs Library_10mM	N15	N	15	F00170	Entinostat	HDAC1/3	E-3866	LC Laboratories	100% DMSO	376.416	10	25	-20°C	Entinostat	C21H20N4O3	3-Pyridylmethyl N-{4-[(2-aminophenyl)carbamoyl]benzyl}carbamate	C21H20N4O3	O=C(OCC1=CC=CN=C1)NCC2=CC=C(C(NC3=CC=CC=C3N)=O)C=C2
274	Oncology Drugs Library_10mM	N16	N	16		Sunitinib	multiple tyrosine kinases
275	Oncology Drugs Library_10mM	N17	N	17		EMPTY
276	Oncology Drugs Library_10mM	N18	N	18		Imiquimod	TLR7 agonist
277	Oncology Drugs Library_10mM	N19	N	19		EMPTY
278	Oncology Drugs Library_10mM	N20	N	20		Romidepsin	HDAC
279	Oncology Drugs Library_10mM	N21	N	21		EMPTY
280	Oncology Drugs Library_10mM	N22	N	22		EMPTY
281	Oncology Drugs Library_10mM	O03	O	03	F00008	AZD 7762 hydrochloride	Chk1	Axon 1399	Axon Medchem	100% DMSO	398.881	10	25	-20°C	AZD 7762 hydrochloride	C17H20ClFN4O2S	5-(3-Fluoro-phenyl)-3-ureido-thiophene-2-carboxylic acid (S)-piperidin-3-ylamide hydrochloride	C17H20ClFN4O2S	O=C(C1=C(NC(N)=O)C=C(C2=CC=CC(F)=C2)S1)N[C@@H]3CNCCC3.[H]Cl
282	Oncology Drugs Library_10mM	O04	O	04	F00091	BIBW2992 (Tovok)_Afatinib	EGFR, HER-2, ErbB	S1011	Selleck	100% DMSO	485.944	10	25	-20°C	BIBW2992 (Tovok)	C24H25ClFN5O3	(S,E)-N-(4-(3-chloro-4-fluorophenylamino)-7-(tetrahydrofuran-3-yloxy)quinazolin-6-yl)-4-(dimethylamino)but-2-enamide	C24H25ClFN5O3	O=C(NC1=CC2=C(NC3=CC=C(F)C(Cl)=C3)N=CN=C2C=C1O[C@@H]4COCC4)/C=C/CN(C)C
283	Oncology Drugs Library_10mM	O05	O	05	F00016	BI 6727_Volasertib	PLK1	CT-BI6727	ChemieTek	100% DMSO	618.827	10	25	-20°C	BI 6727	C34H50N8O3	N-((1s,4S)-4-(4-(cyclopropylmethyl)piperazin-1-yl)cyclohexyl)-4-(((R)-7-ethyl-8-isopropyl-5-methyl-6-oxo-5,6,7,8-tetrahydropteridin-2-yl)amino)-3-methoxybenzamide	C34H50N8O3	O=C(N[C@H]1CC[C@@H](N2CCN(CC3CC3)CC2)CC1)C4=CC=C(NC(N=C5N(C(C)C)[C@@H]6CC)=NC=C5N(C)C6=O)C(OC)=C4
284	Oncology Drugs Library_10mM	O06	O	06	F00099	MK-0752	γ-secretase	S2660	Selleck	100% DMSO	442.902	10	25	-20°C	MK-0752	C21H21ClF2O4S	3-((1r,4s)-4-(4-chlorophenylsulfonyl)-4-(2,5-difluorophenyl)cyclohexyl)propanoic acid	C21H21ClF2O4S	O=C(O)CC[C@H]1CC[C@](C2=CC(F)=CC=C2F)(S(=O)(C3=CC=C(Cl)C=C3)=O)CC1
285	Oncology Drugs Library_10mM	O07	O	07	F00024	R406_Tamatinib	Syk	S2194	Selleck	100% DMSO	628.632	10	25	-20°C	R406	C28H29FN6O8S	6-(5-fluoro-2-(3,4,5-trimethoxyphenylamino)pyrimidin-4-ylamino)-2,2-dimethyl-2H-pyrido[3,2-b][1,4]oxazin-3(4H)-one benzenesulfonate	C28H29FN6O8S	O=C1NC2=NC(NC3=NC(NC4=CC(OC)=C(OC)C(OC)=C4)=NC=C3F)=CC=C2OC1(C)C.O=S(C5=CC=CC=C5)(O)=O
286	Oncology Drugs Library_10mM	O08	O	08	F00107	BKM-120_Buparlisib	PI3K	S2247	Selleck	100% DMSO	410.401	10	25	-20°C	BKM-120	C18H21F3N6O2	5-(2,6-dimorpholinopyrimidin-4-yl)-4-(trifluoromethyl)pyridin-2-amine	C18H21F3N6O2	NC1=NC=C(C2=NC(N3CCOCC3)=NC(N4CCOCC4)=C2)C(C(F)(F)F)=C1
287	Oncology Drugs Library_10mM	O09	O	09	F00032	SB 743921	KSP	S2182	Selleck	100% DMSO	553.524	10	25	-20°C	SB 743921	C31H34Cl2N2O3	(R)-N-(3-aminopropyl)-N-(1-(3-benzyl-7-chloro-4-oxo-4H-chromen-2-yl)-2-methylpropyl)-4-methylbenzamide hydrochloride	C31H34Cl2N2O3	O=C(N(CCCN)[C@@H](C1=C(CC2=CC=CC=C2)C(C3=C(O1)C=C(Cl)C=C3)=O)C(C)C)C4=CC=C(C)C=C4.[H]Cl
288	Oncology Drugs Library_10mM	O10	O	10	F00119	Auranofin	VEGFR3	A6733	Sigma-Aldrich	100% DMSO	482.525	10	25	-20°C	Auranofin	C20H35O9PS	3,4,5-triacetyloxy-6- (acetyloxymethyl) oxane-2-thiolate; triethylphosphanium	C20H35O9PS	[S-]C1OC(COC(C)=O)C(OC(C)=O)C(OC(C)=O)C1OC(C)=O.CC[PH+](CC)CC
289	Oncology Drugs Library_10mM	O11	O	11	F00040	JNJ-26481585_Quisinostat	HDAC	A-1162	Active Biochem	100% DMSO	394.479	10	25	-20°C	JNJ-26481585	C21H26N6O2	N-hydroxy-2-(4-((((1-methyl-1H-indol-3-yl)methyl)amino)methyl)piperidin-1-yl)pyrimidine-5-carboxamide	C21H26N6O2	O=C(C1=CN=C(N2CCC(CNCC3=CN(C)C4=C3C=CC=C4)CC2)N=C1)NO
290	Oncology Drugs Library_10mM	O12	O	12	F00127	Mithramycin A	DNA/RNA polymerase, DNMT1	sc-200909	Santa Cruz Biotechnology	100% DMSO	1085.16	10	25	-20°C	Mithramycin A	C52H76O24	(2S,3S)-2-[(2S,4R,5R,6R)-4-[(2S,4R,5S,6R)-4-[(2S,4S,5R,6R)-4, 5-dihydroxy-4, 6-dimethyloxan-2-yl]oxy-5-hydroxy-6-methyloxan-2-yl]oxy-5-hydroxy-6- methyloxan-2-yl]oxy-3-[(1S,3S,4R)-3, 4-dihydroxy-1-methoxy-2-oxopentyl]-6-[(2S,4R,5R,6R)-4-[(2S,4R,5S,6R)-4, 5-dihydroxy-6-methyloxan-2-yl]oxy-5-hydroxy-6-methyloxan-2-yl]oxy-8, 9-dihydroxy-7-methyl-3,4-dihydro-2H-anthracen-1-one	C52H76O24	O=C1[C@@H](O[C@@H]2O[C@H](C)[C@@H](O)[C@H](O[C@@H]3O[C@H](C)[C@H](O)[C@H](O[C@@H]4O[C@H](C)[C@@H](O)[C@@](C)(O)C4)C3)C2)[C@H]([C@H](OC)C([C@@H](O)[C@H](O)C)=O)CC5=C1C(O)=C6C(O)=C(C)C(O[C@@H]7O[C@H](C)[C@@H](O)[C@H](O[C@@H]8O[C@H](C)[C@@H](O)[C@H](O)C8)C7)=CC6=C5
291	Oncology Drugs Library_10mM	O13	O	13	F00048	AZD1152-HQPA	Aurora B kinase	CT-A1152H	ChemieTek	100% DMSO	507.57	10	25	-20°C	AZD1152-HQPA	C26H30FN7O3	2-(3-((7-(3-(ethyl(2-hydroxyethyl)amino)propoxy)quinazolin-4-yl)amino)-1H-pyrazol-5-yl)-N-(3-fluorophenyl)acetamide	C26H30FN7O3	O=C(NC1=CC=CC(F)=C1)CC2=CC(NC3=C4C=CC(OCCCN(CC)CCO)=CC4=NC=N3)=NN2
292	Oncology Drugs Library_10mM	O14	O	14	F00135	Perifosine aq/PBS	Akt	S1037	Selleck	100% DMSO	461.668	10	25	-20°C	Perifosine aq/PBS	C25H52NO4P	Piperidinium, 4-[[hydroxy(octadecyloxy)phosphinyl]oxy]-1,1-dimethyl-, inner salt	C25H52NO4P	C[N+]1(C)CCC(OP(OCCCCCCCCCCCCCCCCCC)([O-])=O)CC1
293	Oncology Drugs Library_10mM	O15	O	15	F00056	GDC-0068	Akt	CT-G0068	ChemieTek	100% DMSO	458.003	10	25	-20°C	GDC-0068	C24H32ClN5O2	(S)-2-(4-chlorophenyl)-1-(4-((5R,7R)-7-hydroxy-5-methyl-6,7-dihydro-5H-cyclopenta[d]pyrimidin-4-yl)piperazin-1-yl)-3-(isopropylamino)propan-1-one	C24H32ClN5O2	O=C(N1CCN(C2=C([C@H](C)C[C@H]3O)C3=NC=N2)CC1)[C@@H](C4=CC=C(Cl)C=C4)CNC(C)C
294	Oncology Drugs Library_10mM	O16	O	16	F00182	Pazopanib	multiple tyrosine kinases	P-6706	LC Laboratories	100% DMSO	437.522	10	25	-20°C	Pazopanib	C21H23N7O2S	5-[[4-[(2,3-Dimethyl-2H-indazol-6-yl)methylamino]-2-pyrimidinyl]amino]-2-methyl-benzenesulfonamide	C21H23N7O2S	O=S(C1=CC(NC2=NC=CC(N(C3=CC4=NN(C)C(C)=C4C=C3)C)=N2)=CC=C1C)(N)=O
295	Oncology Drugs Library_10mM	O17	O	17	F00064	ARQ 197_Tivantinib	c-Met	CT-ARQ197	ChemieTek	100% DMSO	369.424	10	25	-20°C	ARQ 197	C23H19N3O2	(-)-trans-3-(5,6-dihydro-4H-pyrrolo(3,2,1-ij)quinolin-1-yl)-4-(1H-indol-3-yl)pyrrolidin-2,5-dione	C23H19N3O2	O=C([C@H](C1=CN2CCCC3=CC=CC1=C23)[C@H]4C5=CNC6=C5C=CC=C6)NC4=O
296	Oncology Drugs Library_10mM	O18	O	18	F00190	Sorafenib	VEGFR, PDGFR, Raf kinases	S-8502	LC Laboratories	100% DMSO	637.027	10	25	-20°C	Sorafenib	C28H24ClF3N4O6S	4-[4-[[4-chloro-3-(trifluoromethyl)phenyl]carbamoylamino]phenoxy]-N-methylpyridine-2-carboxamide Tosylate	C28H24ClF3N4O6S	O=C(C1=NC=CC(OC2=CC=C(NC(NC3=CC=C(Cl)C(C(F)(F)F)=C3)=O)C=C2)=C1)NC.OS(=O)(C4=CC=C(C)C=C4)=O
297	Oncology Drugs Library_10mM	O19	O	19	F00072	NVP-BGJ398	FGFR1/2/3	CT-BGJ398	ChemieTek	100% DMSO	560.48	10	25	-20°C	NVP-BGJ398	C26H31Cl2N7O3	3-(2,6-dichloro-3,5-dimethoxyphenyl)-1-(6-((4-(4-ethylpiperazin-1-yl)phenyl)amino)pyrimidin-4-yl)-1-methylurea	C26H31Cl2N7O3	O=C(NC1=C(Cl)C(OC)=CC(OC)=C1Cl)N(C2=NC=NC(NC3=CC=C(N4CCN(CC)CC4)C=C3)=C2)C
298	Oncology Drugs Library_10mM	O20	O	20	F00198	Dexamethasone (Decadron)	glucocorticoid agonist	S1322	Selleck	100% DMSO	392.467	10	25	-20°C	Dexamethasone (Decadron)	C22H29FO5	(8S,9R,10S,11S,13S,14S,16R,17R)-9-fluoro-11,17-dihydroxy-17-(2-hydroxyacetyl)-10,13,16-trimethyl-7,8,11,12,13,15,16,17-octahydro-6H-cyclopenta[a]phenanthren-3(9H,10H,14H)-one	C22H29FO5	O=C1C=C[C@]2(C)[C@@]3(F)[C@@H](O)C[C@]4(C)[C@](C(CO)=O)(O)[C@H](C)C[C@@]4([H])[C@]3([H])CCC2=C1
299	Oncology Drugs Library_10mM	O21	O	21	F00080	XL-147	PI3K	CT-XL147	ChemieTek	100% DMSO	448.519	10	25	-20°C	XL-147	C21H16N6O2S2	N-(3-(benzo[c][1,2,5]thiadiazol-5-ylamino)quinoxalin-2-yl)-4-methylbenzenesulfonamide	C21H16N6O2S2	O=S(C1=CC=C(C)C=C1)(NC2=NC3=CC=CC=C3N=C2NC4=CC5=NSN=C5C=C4)=O
300	Oncology Drugs Library_10mM	O22	O	22	F00206	Capecitabine	thymidylate synthase (thymidine biosynthesis)	C-2799	LC Laboratories	100% DMSO	359.354	10	25	-20°C	Capecitabine	C15H22FN3O6	N-[1-[(2R,3R,4S,5R)-3,4-dihydroxy-5-methyloxolan-2-yl]-5-fluoro-2-oxopyrimidin-4-yl]carbamic acid pentyl ester	C15H22FN3O6	O=C(OCCCCC)NC(C(F)=CN1[C@@H]2O[C@H](C)[C@@H](O)[C@H]2O)=NC1=O
301	Oncology Drugs Library_10mM	P03	P	03	F00214	Hydroxyurea	ribonucleotide reductase	H8627	Sigma-Aldrich	100% DMSO	76.055	10	25	-20°C	Hydroxyurea	CH4N2O2	Hydroxycarbamide	CH4N2O2	O=C(N)NO
302	Oncology Drugs Library_10mM	P04	P	04		Dacarbazine	DNA alkylation
303	Oncology Drugs Library_10mM	P05	P	05	F00222	Aminoglutethimide	aromatase (estrogen biosynthesis)	A9657	Sigma-Aldrich	100% DMSO	232.283	10	25	-20°C	Aminoglutethimide	C13H16N2O2	3-(p-Aminophenyl)-3-ethylpiperidine-2,6-dione	C13H16N2O2	O=C(C(CC)(C1=CC=C(N)C=C1)CC2)NC2=O
304	Oncology Drugs Library_10mM	P06	P	06		Uracil mustard	DNA synthesis
305	Oncology Drugs Library_10mM	P07	P	07	F00116	PF-3845	fatty acid amide hydrolase	S2666	Selleck	100% DMSO	456.469	10	25	-20°C	PF-3845	C24H23F3N4O2	4-(3-(5-(trifluoromethyl)pyridin-2-yloxy)benzyl)-N-(pyridin-3-yl)piperidine-1-carboxamide	C24H23F3N4O2	O=C(N1CCC(CC2=CC=CC(OC3=NC=C(C(F)(F)F)C=C3)=C2)CC1)NC4=CC=CN=C4
306	Oncology Drugs Library_10mM	P08	P	08		Dexrazoxone	iron chelator
307	Oncology Drugs Library_10mM	P09	P	09	F00146	Varespladib	secretory phospholipase A2	CT-VARE	ChemieTek	100% DMSO	380.4	10	25	-20°C	Varespladib	C21H20N2O5	[[3-(Aminooxoacetyl)-2-ethyl-1-(phenylmethyl)-1H-indol-4-yl]oxy]acetic acid	C21H20N2O5	O=C(O)COC1=CC=CC2=C1C(C(C(N)=O)=O)=C(CC)N2CC3=CC=CC=C3
308	Oncology Drugs Library_10mM	P10	P	10		Tamoxifen citrate	estrogen receptor
309	Oncology Drugs Library_10mM	P11	P	11	F00155	PAC-1	caspase-3 activator	S2738	Selleck	100% DMSO	392.503	10	25	-20°C	PAC-1	C23H28N4O2	(E)-N'-(3-allyl-2-hydroxybenzylidene)-2-(4-benzylpiperazin-1-yl)acetohydrazide	C23H28N4O2	O=C(N/N=C/C1=CC=CC(CC=C)=C1O)CN2CCN(CC3=CC=CC=C3)CC2
310	Oncology Drugs Library_10mM	P12	P	12		Topotecan HCl	DNA topoisomerase I
311	Oncology Drugs Library_10mM	P13	P	13	F00163	17-AAG (Tanespimycin, Geldanamycin)	HSP90	S1141	Selleck	100% DMSO	560.644	10	25	-20°C	17-AAG (Tanespimycin, Geldanamycin)	C29H40N2O9	(8R,9R,12R,13R,14R,16S)-13-hydroxy-8,14,19-trimethoxy-4,10,12,16-tetramethyl-3,20,22-trioxo-2-azabicyclo[16.3.1]docosa-1(21),4,6,10,18-pentaen-9-yl carbamate	C29H40N2O9	NC(O[C@H](/C(C)=C/[C@@H](C)[C@@H](O)[C@H](OC)C[C@@H](C)CC1=C2OC)[C@H](OC)/C=C/C=C(C)/C(NC(C1=O)=CC2=O)=O)=O
312	Oncology Drugs Library_10mM	P14	P	14		Letrozole	aromatase (estrogen biosynthesis)
313	Oncology Drugs Library_10mM	P15	P	15	F00171	Prima-1 Met	p53 (mutant) activator	3710	Tocris Biosciences	100% DMSO	199.25	10	25	-20°C	Prima-1 Met	C10H17NO3	2-(Hydroxymethyl)-2-(methoxymethyl)-1-azabicyclo[2.2.2]octan-3-one	C10H17NO3	O=C1C(COC)(CO)N2CCC1CC2
314	Oncology Drugs Library_10mM	P16	P	16		Mitoxantrone	DNA topoisomerase II
315	Oncology Drugs Library_10mM	P17	P	17		EMPTY
316	Oncology Drugs Library_10mM	P18	P	18		Triethylenemelamine	DNA alkylation
317	Oncology Drugs Library_10mM	P19	P	19		EMPTY
318	Oncology Drugs Library_10mM	P20	P	20		Pralatrexate	dihydrofolate reductase (thymidine biosynthesis)
319	Oncology Drugs Library_10mM	P21	P	21		EMPTY
320	Oncology Drugs Library_10mM	P22	P	22		EMPTY

## Sheet: Selleck Library
				TrANsFEr 4x96->384 Z-sHAPE (PLAtE 1->A1, PLAtE 2->A2, PLAtE 3->B1, PLAtE 4->B2)
	Catalog No.	Product Name	Plate Location	384-well Row	384-well Column	384-Wells Rack Number	M.w.	CAS Number	Form	Targets	Information	Smiles	Max Solubility in DMSO (mM)	URL	Pathway
1	S1010	Nintedanib (BIBF 1120)	A03	A	03	384-L1700-01	539.62	656247-17-5	free base	VEGFR,PDGFR,FGFR	Nintedanib (BIBF 1120) is a potent triple angiokinase inhibitor for VEGFR1/2/3, FGFR1/2/3 and PDGFRα/β with IC50 of 34 nM/13 nM/13 nM, 69 nM/37 nM/108 nM and 59 nM/65 nM. Phase 3.	C1=C(C=C2C(=C1)/C(C(N2)=O)=C(\C3=CC=CC=C3)NC4=CC=C(C=C4)N(C)C(CN5CCN(CC5)C)=O)C(OC)=O	11	http://www.selleckchem.com/products/BIBF1120.html	Protein Tyrosine Kinase
1	S1120	Everolimus (RAD001)	A04	A	04	384-L1700-01	958.22	159351-69-6	free base	mTOR	Everolimus (RAD001) is an mTOR inhibitor of FKBP12 with IC50 of 1.6-2.4 nM.	C(O)CO[C@H]1[C@@H](C[C@@H](CC1)C[C@@H]([C@H]2OC(=O)[C@@H]3CCCCN3C(=O)C([C@]4([C@@H](CC[C@H](O4)C[C@@H](/C(=C/C=C/C=C/[C@H](C[C@H](C([C@@H]([C@@H](O)/C(=C/[C@H](C(C2)=O)C)C)OC)=O)C)C)C)OC)C)O)=O)C)OC	31	http://www.selleckchem.com/products/Everolimus(RAD001).html	PI3K/Akt/mTOR
9	S1021	Dasatinib	A05	A	05	384-L1700-01	488.01	302962-49-8	free base	Bcr-Abl,c-Kit,Src	Dasatinib is a novel, potent and multi-targeted inhibitor that targets Abl, Src and c-Kit, with IC50 of ＜1 nM, 0.8 nM and 79 nM, respectively.	N1=C(N=C(C=C1NC2=NC=C(S2)C(NC3=C(C=CC=C3C)Cl)=O)N4CCN(CC4)CCO)C	200	http://www.selleckchem.com/products/Dasatinib.html	Angiogenesis
9	S1134	AT9283	A06	A	06	384-L1700-01	381.43	896466-04-9	free base	JAK,Aurora Kinase,Bcr-Abl	AT9283 is a potent JAK2/3 inhibitor with IC50 of 1.2 nM/1.1 nM; also potent to Aurora A/B, Abl(T315I). Phase 1/2.	N(C(=O)NC1C(=NNC=1)C2NC3C(N=2)=CC(=CC=3)CN4CCOCC4)C5CC5	199	http://www.selleckchem.com/products/AT9283.html	JAK/STAT
17	S1032	Motesanib Diphosphate (AMG-706)	A07	A	07	384-L1700-01	569.44	857876-30-3	diphosphate	VEGFR,PDGFR,c-Kit	Motesanib Diphosphate (AMG-706) is a potent ATP-competitive inhibitor of VEGFR1/2/3 with IC50 of 2 nM/3 nM/6 nM, respectively; similar activity against Kit, ~10-fold more selective for VEGFR than PDGFR and Ret. Phase 1/2.	C1(=CN=CC=C1CNC2=C(C=CC=N2)C(=O)NC3=CC=C4C(=C3)NCC4(C)C).P(O)(=O)(O)O.P(O)(=O)(O)O	175	http://www.selleckchem.com/products/Motesanib-Diphosphate.html	Protein Tyrosine Kinase
17	S1144	Ivacaftor (VX-770)	A08	A	08	384-L1700-01	392.49	873054-44-5	free base	CFTR	Ivacaftor (VX-770) is a potentiator of CFTR targeting G551D-CFTR and F508del-CFTR with EC50 of 100 nM and 25 nM, respectively.	C1=C(C(=CC(=C1C(C)(C)C)NC(C2C(C3=C(NC=2)C=CC=C3)=O)=O)O)C(C)(C)C	198	http://www.selleckchem.com/products/VX-770.html	Transmembrane Transporters
25	S1041	STF-62247	A09	A	09	384-L1700-01	267.35	315702-99-9	free base	Others	STF-62247 shows selectivtoxicity and growth inhibition of renal cells lacking VHL; 25-fold greater sensitivity observed for cells with VHL deficiency compared to wild-type (VHL+).	N1=CC=C(C=C1)C2=CSC(=N2)NC3=CC=CC(=C3)C	198	http://www.selleckchem.com/products/STF-62247.html	Others
25	S1155	S3I-201	A10	A	10	384-L1700-01	365.36	501919-59-1	free base	STAT	S3I-201 shows potent inhibition of STAT3 DNA-binding activity with IC50 of 86 μM, and low activity towards STAT1 and STAT5.	C1(=CC=C(C=C1)S(OCC(NC2=CC=C(C(=C2)O)C(O)=O)=O)(=O)=O)C	199	http://www.selleckchem.com/products/S31-201.html	JAK/STAT
33	S1049	Y-27632 2HCl	A11	A	11	384-L1700-01	320.26	129830-38-2	dihydrochloric	Autophagy,ROCK	Y-27632 2HCl is a selective ROCK1 (p160ROCK) inhibitor with Ki of 140 nM, exhibits >200-fold selectivity over other kinases, including PKC, cAMP-dependent protein kinase, MLCK and PAK.	[C@@H]1(CC[C@@H](CC1)[C@@H](C)N)C(=O)NC2(C=CN=CC=2).Cl.Cl	199	http://www.selleckchem.com/products/Y-27632.html	Cell Cycle
33	S1165	ABT-751 (E7010)	A12	A	12	384-L1700-01	371.41	141430-65-1	free base	Microtubule Associated	ABT-751 (E7010) binds to the colchicine site on β-tubulin and inhibits polymerization of microtubules, not a substrate for the MDR transporter and is active against cell lines resistant to vincristine, doxorubicin, and cisplatin. Phase 1/2.	C1=C(C=CC(=C1)S(=O)(=O)NC2=C(N=CC=C2)NC3=CC=C(C=C3)O)OC	199	http://www.selleckchem.com/products/ABT-751.html	Cytoskeletal Signaling
41	S1064	Masitinib (AB1010)	A13	A	13	384-L1700-01	498.64	790299-79-5	free base	PDGFR,c-Kit	Masitinib is a novel inhibitor for Kit and PDGFRα/β with IC50 of 200 nM and 540 nM/800 nM, weak inhibition to ABL and c-Fms. Phase 2/3.	C1(=C(C=C(C=C1)NC(=O)C2=CC=C(C=C2)CN3CCN(CC3)C)NC4=NC(=CS4)C5=CC=CN=C5)C	200	http://www.selleckchem.com/products/Masitinib-(AB1010).html	Protein Tyrosine Kinase
41	S1173	WZ4002	A14	A	14	384-L1700-01	494.18	1213269-23-8	free base	EGFR	WZ4002 is a novel, mutant-selective EGFR inhibitor for EGFR(L858R)/(T790M) with IC50 of 2 nM/8 nM; does not inhibit ERBB2 phosphorylation (T798I).	C1(=CC(=C(C=C1)NC2=NC=C(C(=N2)OC3=CC(=CC=C3)NC(C=C)=O)Cl)OC)N4CCN(CC4)C	26	http://www.selleckchem.com/products/WZ4002.html	Protein Tyrosine Kinase
49	S1072	ZSTK474	A15	A	15	384-L1700-01	417.41	475110-96-4	free base	PI3K	ZSTK474 inhibits class I PI3Kisoforms with IC50 of 37 nM, mostly PI3Kδ.	N1=C(N=C(N=C1N2CCOCC2)N3C4=C(N=C3C(F)F)C=CC=C4)N5CCOCC5	50	http://www.selleckchem.com/products/ZSTK474.html	PI3K/Akt/mTOR
49	S1183	Danoprevir (ITMN-191)	A16	A	16	384-L1700-01	731.83	850876-88-9	free base	HCV Protease	Danoprevir(ITMN-191) is a peptidomimetic inhibitor of the NS3/4A protease of hepatitis C virus (HCV) with IC50 of 0.2-3.5 nM, inhibition effect for HCV genotypes 1A/1B/4/5/6 is ~10-fold higher than 2B/3A. Phase 2.	[C@@H]1(CN2[C@@H](C1)C(N[C@@]3(C(NS(=O)(=O)C4CC4)=O)[C@@H](C3)/C=C\CCCCC[C@@H](C2=O)NC(OC(C)(C)C)=O)=O)OC(N5CC6=C(C5)C(=CC=C6)F)=O	196	http://www.selleckchem.com/products/Danoprevir.html	Proteases
57	S1085	Belinostat (PXD101)	A17	A	17	384-L1700-01	318.35	414864-00-9	free base	HDAC	Belinostat (PXD101) is a novel HDAC inhibitor with IC50 of 27 nM, with activity demonstrated in cisplatin-resistant tumors. Phase 1/2.	C1(=CC=CC(=C1)/C=C/C(NO)=O)S(NC2=CC=CC=C2)(=O)=O	201	http://www.selleckchem.com/products/Belinostat.html	Epigenetics
57	S1193	Thalidomide	A18	A	18	384-L1700-01	258.23	50-35-1	free base	TNF-alpha,E3 Ligase	Thalidomide was introduced as a sedative drug, immunomodulatory agent and also is investigated for treating symptoms of many cancers. Thalidomide inhibits an E3 ubiquitin ligase, which is a CRBN-DDB1-Cul4A complex.Phase 3.	C1(N(C(C2C=CC=CC1=2)=O)C3C(NC(CC3)=O)=O)=O	201	http://www.selleckchem.com/products/Thalidomide.html	Apoptosis
65	S1094	PF-04217903	A19	A	19	384-L1700-01	372.38	956905-27-4	free base	c-Met	PF-04217903 is a selective ATP-competitive c-Met inhibitor with IC50 of 4.8 nM, susceptible to oncogenic mutations (no activity to Y1230C mutant). Phase 1.	C12=CC=CN=C1C=CC(=C2)CN3C4=C(N=N3)N=CC(=N4)C5=CN(N=C5)CCO	13	http://www.selleckchem.com/products/PF-04217903.html	Protein Tyrosine Kinase
65	S1201	Dimesna	A20	A	20	384-L1700-01	326.34	16208-51-8	free base	Others	Dimesna is an uroprotective agent used to decrease urotoxicity.	S(CCSSCCS([O-])(=O)=O)([O-])(=O)=O.[Na+].[Na+]	199	http://www.selleckchem.com/products/Dimesna.html	Others
73	S1103	ZM 447439	A21	A	21	384-L1700-01	513.59	331771-20-1	free base	Aurora Kinase	ZM 447439 is a selective and ATP-competitive inhibitor for Aurora A and Aurora B with IC50 of 110 nM and 130 nM, respectively. It is more than 8-fold selective for Aurora A/B than MEK1, Src, Lck and has little effect againstCDK1/2/4, Plk1, Chk1, etc.	O1CCN(CC1)CCCOC2=C(C=C3C(=C2)N=CN=C3NC4=CC=C(C=C4)NC(=O)C5=CC=CC=C5)OC	200	http://www.selleckchem.com/products/ZM-447439.html	Cell Cycle
73	S1210	Methotrexate	A22	A	22	384-L1700-01	454.44	59-05-2	free base	DHFR	Methotrexate is an antimetabolite and antifolate drug, which acts by inhibiting the metabolism of folic acid.	N1=C(N=C2C(=C1N)N=C(C=N2)CN(C3=CC=C(C=C3)C(N[C@@H](CCC(=O)O)C(=O)O)=O)C)N	200	http://www.selleckchem.com/products/Abitrexate.html	Metabolism
1	S1229	Fludarabine Phosphate	B03	B	03	384-L1700-01	365.21	75607-67-9	phosphate	DNA/RNA Synthesis	Fludarabine Phosphate is an analogue of adenosine and deoxyadenosine, which is able to compete with dATP for incorporation into DNA and inhibit DNA synthesis.	N1C(=NC2=C(C=1N)N=CN2[C@H]3[C@H]([C@@H]([C@H](O3)COP(=O)(O)O)O)O)F	199	http://www.selleckchem.com/products/Fludara.html	DNA Damage
1	S1380	Lopinavir	B04	B	04	384-L1700-01	628.8	192725-17-0	free base	HIV Protease	Lopinavir is a potent HIV protease inhibitor with Ki of 1.3 pM.	C1=CC=C(C(=C1C)OCC(N[C@@H](CC2=CC=CC=C2)[C@H](C[C@H](CC3=CC=CC=C3)NC(=O)[C@@H](N4CCCNC4=O)C(C)C)O)=O)C	200	http://www.selleckchem.com/products/Lopinavir.html	Proteases
9	S1244	Amuvatinib (MP-470)	B05	B	05	384-L1700-01	447.51	850879-09-3	free base	FLT3,c-RET,PDGFR,c-Kit	Amuvatinib (MP-470) is a potent and multi-targeted inhibitor of c-Kit, PDGFRα and Flt3 with IC50 of 10 nM, 40 nM and 81 nM, respectively. Phase 2.	C1=CC=C2C(=C1)C3=C(O2)C(=NC=N3)N4CCN(CC4)C(=S)NCC5=CC=C6C(=C5)OCO6	71	http://www.selleckchem.com/products/MP-470.html	Protein Tyrosine Kinase
9	S1391	Oxcarbazepine	B06	B	06	384-L1700-01	252.27	28721-07-5	free base	Sodium Channel	Oxcarbazepine inhibits the binding of [3H]BTX to sodium channels with IC50 of 160 μM and also inhibits the influx of 22Na+ into rat brain synaptosomes with IC50 about 100 μM.	N1(C2=C(C(CC3=C1C=CC=C3)=O)C=CC=C2)C(N)=O	27	http://www.selleckchem.com/products/Oxcarbazepine.html	Transmembrane Transporters
17	S1256	Rufinamide	B07	B	07	384-L1700-01	238.19	106308-44-5	free base	Sodium Channel	Rufinamide, a triazole derivative, is an anticonvulsant medication.	C1=CC=C(C(=C1F)CN2N=NC(=C2)C(=O)N)F	201	http://www.selleckchem.com/products/Rufinamide.html	Transmembrane Transporters
17	S1403	Tigecycline	B08	B	08	384-L1700-01	585.65	220620-09-7	free base	Others	Tigecycline is bacteriostatic and is a protein synthesis inhibitor by binding to the 30S ribosomal subunit of bacteria and thereby blocking entry of Aminoacyl-tRNA into the A site of the ribosome during prokaryotic translation.	C1(=CC(=C(C2=C1C[C@@]3(C(C2=O)=C([C@]4([C@@](C3)([C@H](C(=C(C4=O)C(=O)N)O)N(C)C)[H])O)O)[H])O)NC(CNC(C)(C)C)=O)N(C)C	170	http://www.selleckchem.com/products/Tigecycline.html	Others
25	S1266	WYE-354	B09	B	09	384-L1700-01	495.53	1062169-56-5	free base	mTOR	WYE-354 is a potent, specific and ATP-competitive inhibitor of mTOR with IC50 of 5 nM, blocks mTORC1/P-S6K(T389) and mTORC2/P-AKT(S473) not P-AKT(T308), selective for mTOR than PI3Kα (>100-fold) and PI3Kγ (>500-fold).	C1=C(C=CC(=C1)C2=NC3=C(C(=N2)N4CCOCC4)C=NN3C5CCN(CC5)C(=O)OC)NC(OC)=O	199	http://www.selleckchem.com/products/WYE-354.html	PI3K/Akt/mTOR
25	S1425	Ranolazine 2HCl	B10	B	10	384-L1700-01	500.46	95635-56-6	dihydrochloride	Calcium Channel	Ranolazine 2HCl, is an antianginal medication.	C1(=C(C(=C(C=C1)C)NC(=O)CN2CCN(CC2)CC(O)COC3=CC=CC=C3OC)C).Cl.Cl	199	http://www.selleckchem.com/products/Ranolazine-dihydrochloride.html	Transmembrane Transporters
33	S1281	Aniracetam	B11	B	11	384-L1700-01	219.24	72432-10-1	free base	AMPA Receptor-kainate Receptor-NMDA Receptor	Aniracetam is a nootropics and neuroprotective drug.	C1(=CC=C(C=C1)C(N2C(CCC2)=O)=O)OC	200	http://www.selleckchem.com/products/Aniracetam.html	Neuronal Signaling
33	S1439	Tranilast	B12	B	12	384-L1700-01	327.33	53902-12-8	free base	Others	Tranilast is an antiallergic compound.	C1(=C(C=CC(=C1)/C=C/C(NC2=CC=CC=C2C(O)=O)=O)OC)OC	201	http://www.selleckchem.com/products/Tranilast.html	Others
41	S1289	Carmofur	B13	B	13	384-L1700-01	257.26	61422-45-5	free base	DNA/RNA Synthesis	Carmofur is a pyrimidine analogue used as an antineoplastic agent.	C1(C(NC(N(C=1)C(NCCCCCC)=O)=O)=O)F	202	http://www.selleckchem.com/products/Carmofur.html	DNA Damage
41	S1452	Ispinesib (SB-715992)	B14	B	14	384-L1700-01	517.06	336113-53-2	free base	Kinesin	Ispinesib (SB-715992, CK0238273) is a potent, specific and reversible inhibitor of kinesin spindle protein (KSP) with Ki app of 1.7 nM, no inhibition to CENP-E, RabK6, MCAK, MKLP1, KHC or Kif1A. Phase 1/2.	C1=CC(=CC=C1)CN2C(C3=C(N=C2[C@H](N(CCCN)C(C4=CC=C(C=C4)C)=O)C(C)C)C=C(C=C3)Cl)=O	199	http://www.selleckchem.com/products/Ispinesib-mesilate(SB-715992).html	Cytoskeletal Signaling
49	S1304	Megestrol Acetate	B15	B	15	384-L1700-01	384.51	595-33-5	acetate	Estrogen/progestogen Receptor,Androgen Receptor	Megestrol Acetate is a synthetic progesteronal agent with an IC50 of 260 μM for the inhibition of HegG2.	C1C(C=C2[C@](C1)([C@]3([C@@](C=C2C)([C@]4([C@](CC3)([C@@](CC4)(C(C)=O)OC(=O)C)C)[H])[H])[H])C)=O	85	http://www.selleckchem.com/products/Megestrol-Acetate.html	Endocrinology & Hormones
49	S1460	SP600125	B16	B	16	384-L1700-01	220.23	129-56-6	free base	JNK	SP600125 is a broad-spectrum JNK inhibitor for JNK1, JNK2 and JNK3 with IC50 of 40 nM, 40 nM and 90 nM, respectively; 10-fold greater selectivity against MKK4, 25-fold greater selectivity against MKK3, MKK6, PKB, and PKCα, and 100-fold selectivity against ERK2, p38, Chk1, EGFR etc.	C1C=CC2=C(C=1)C(C3=C4C2=NNC4=CC=C3)=O	199	http://www.selleckchem.com/products/SP600125.html	MAPK
57	S1328	Etodolac	B17	B	17	384-L1700-01	287.35	41340-25-4	free base	COX	Etodolac (Lodine) is a COX inhibitor with an IC50 of 53.5 nM.	C1=CC2=C(C(=C1)CC)NC3=C2CCO[C@]3(CC(=O)O)CC	201	http://www.selleckchem.com/products/Etodolac.html	Neuronal Signaling
57	S1472	Safinamide Mesylate	B18	B	18	384-L1700-01	398.45	202825-46-5	mesylate	MAO	Safinamide Mesylate is mesylate salt of Safinamide, selectively and reversibly inhibits MAO-B with IC50 of 98 nM, exhibits 5918-fold selectivity against MAO-A. Phase 3.	C1(=CC=CC(=C1)COC2=CC=C(C=C2)CN[C@H](C(N)=O)C)F.CS(=O)(=O)O	200	http://www.selleckchem.com/products/Safinamide-mesilate.html	Metabolism
65	S1342	Genistein	B19	B	19	384-L1700-01	270.24	446-72-0	free base	Topoisomerase,EGFR	Genistein, a phytoestrogen found in soy products, is a highly specific inhibitor of protein tyrosine kinase (PTK) which blocks the mitogenic effect mediated by EGF on NIH-3T3 cells with IC50 of 12μM or by insulin with IC50 of 19 μM.	C1(=CC2=C(C(=C1)O)C(C(=CO2)C3=CC=C(C=C3)O)=O)O	199	http://www.selleckchem.com/products/Genistein.html	Protein Tyrosine Kinase
65	S1483	Iloperidone	B20	B	20	384-L1700-01	426.48	133454-47-4	free base	Others	Iloperidone is an atypical antipsychotic for the treatment of schizophrenia.	C1(=C(C=CC(=C1)C(C)=O)OCCCN2CCC(CC2)C3=NOC4=C3C=CC(=C4)F)OC	63	http://www.selleckchem.com/products/Iloperidone(Fanapt).html	Others
73	S1357	Lidocaine	B21	B	21	384-L1700-01	234.34	137-58-6	free base	Histamine Receptor	Lidocaine is a selective inverse peripheral histamine H1-receptor agonist with an IC50 of >32 μM.	C1=CC=C(C(=C1C)NC(CN(CC)CC)=O)C	200	http://www.selleckchem.com/products/Lidocaine.html	Neuronal Signaling
73	S1494	LY2228820	B22	B	22	384-L1700-01	612.74	862507-23-1	mesylate	p38 MAPK	LY2228820 is a novel and potent inhibitor of p38 MAPK with IC50 of 7 nM, does not alter p38 MAPK activation. Phase 1/2.	CC(C1=NC(=C(N1)C2=NC3=C(C=C2)N=C(N3CC(C)(C)C)N)C4=CC=C(C=C4)F)(C)C.CS(=O)(=O)O.CS(=O)(=O)O	57	http://www.selleckchem.com/products/LY2228820.html	MAPK
2	S1011	Afatinib (BIBW2992)	C03	C	03	384-L1700-01	485.94	439081-18-2	free base	EGFR,HER2	Afatinib (BIBW2992) irreversibly inhibits EGFR/HER2 including EGFR(wt), EGFR(L858R), EGFR(L858R/T790M) and HER2 with IC50 of 0.5 nM, 0.4 nM, 10 nM and 14 nM, respectively; 100-fold more active against Gefitinib-resistant L858R-T790M EGFR mutant. Phase 3.	C1(=C(C=C(C=C1)NC2=NC=NC3=C2C=C(C(=C3)O[C@H]4CCOC4)NC(/C=C/CN(C)C)=O)Cl)F	199	http://www.selleckchem.com/products/BIBW2992.html	Protein Tyrosine Kinase
2	S1121	TW-37	C04	C	04	384-L1700-01	573.7	877877-35-5	free base	Bcl-2	TW-37 is a novel nonpeptide inhibitor to recombinant Bcl-2, Bcl-xL and Mcl-1 with Ki of 0.29 μM, 1.11 μM and 0.26 μM, respectively.	C1=CC=CC(=C1C(C)(C)C)S(C2=CC=C(C=C2)NC(C3=C(C(=C(C(=C3)CC4=CC=CC=C4C(C)C)O)O)O)=O)(=O)=O	200	http://www.selleckchem.com/products/TW-37.html	Apoptosis
10	S1022	Ridaforolimus (Deforolimus, MK-8669)	C05	C	05	384-L1700-01	990.21	572924-54-0	free base	mTOR	Ridaforolimus (Deforolimus) is a selective mTOR inhibitor with IC50 of 0.2 nM; while not classified as a prodrug, mTOR inhibition and FKBP12 binding is similar to rapamycin.	[C@H]1(C[C@@H](CC[C@@H]1OP(C)(=O)C)C[C@H]([C@@H]2CC([C@@H](/C=C(/[C@H]([C@@H](OC)C([C@@H](C[C@@H](/C=C/C=C/C=C(/[C@H](C[C@]3(CC[C@H]([C@](C(C(N4[C@](C(O2)=O)(CCCC4)[H])=O)=O)(O3)O)C)[H])OC)C)C)C)=O)O)C)C)=O)C)OC	199	http://www.selleckchem.com/products/Deforolimus.html	PI3K/Akt/mTOR
10	S1137	Malotilate	C06	C	06	384-L1700-01	288.38	59937-28-9	free base	Others	Malotilate is a liver protein metabolism improved compound.	C(C(C(=O)OC(C)C)=C1SC=CS1)(=O)OC(C)C	201	http://www.selleckchem.com/products/Malotilate.html	Others
18	S1033	Nilotinib (AMN-107)	C07	C	07	384-L1700-01	529.52	641571-10-0	free base	Bcr-Abl	Nilotinib (AMN-107) is a Bcr-Abl inhibitor with IC50 less than 30 nM.	C1(=CC=C(C(=C1)NC2=NC=CC(=N2)C3=CN=CC=C3)C)C(=O)NC4=CC(=CC(=C4)N5C=C(N=C5)C)C(F)(F)F	50	http://www.selleckchem.com/products/Nilotinib.html	Angiogenesis
18	S1145	SNS-032 (BMS-387032)	C08	C	08	384-L1700-01	380.53	345627-80-7	free base	CDK	SNS-032 has firstly been described as a selective inhibitor of CDK2 with IC50 of 48 nM and is 10- and 20-fold selective over CDK1/CDK4. It is also found to be sensitive to CDK7/9 with IC50 of 62 nM/4 nM, with little effect on CDK6. Phase 1.	C1(=CN=C(O1)CSC2=CN=C(S2)NC(=O)C3CCNCC3)C(C)(C)C	199	http://www.selleckchem.com/products/SNS-032.html	Cell Cycle
26	S1042	Sunitinib Malate	C09	C	09	384-L1700-01	532.56	341031-54-7	malate	VEGFR,PDGFR,c-Kit	Sunitinib Malate is a multi-targeted RTK inhibitor targeting VEGFR2 (Flk-1) and PDGFRβ with IC50 of 80 nM and 2 nM, and also inhibits c-Kit.	C1(=CC=C2C(=C1)/C(C(N2)=O)=C/C3NC(=C(C=3C)C(NCCN(CC)CC)=O)C)F.C(C[C@@H](C(O)=O)O)(O)=O	28	http://www.selleckchem.com/products/Sunitinib-Malate-(Sutent).html	Protein Tyrosine Kinase
26	S1156	Capecitabine	C10	C	10	384-L1700-01	359.35	154361-50-9	free base	DNA/RNA Synthesis	Capecitabine is a tumor-selective fluoropyrimidine carbamate which achieves higher intratumoral 5-FU level with lower toxicity than 5-FU.	N1=C(C(=CN(C1=O)[C@@H]2O[C@@H]([C@H]([C@@H]2O)O)C)F)NC(OCCCCC)=O	200	http://www.selleckchem.com/products/Capecitabine(Xeloda).html	DNA Damage
34	S1052	Elesclomol (STA-4783)	C11	C	11	384-L1700-01	400.5	488832-69-5	free base	HSP (e.g. HSP90)	Elesclomol (STA-4783) is a novel potent oxidative stress inducer that elicits pro-apoptosis events among tumor cells.	C1=CC=C(C=C1)C(N(NC(CC(NN(C)C(=S)C2=CC=CC=C2)=O)=O)C)=S	199	http://www.selleckchem.com/products/Elesclomol.html	Cytoskeletal Signaling
34	S1166	Cisplatin	C12	C	12	384-L1700-01	300.05	15663-27-1	free base	DNA/RNA Synthesis	Cisplatin is an inorganic platinum complex, which is able to inhibit DNA synthesis by conforming DNA adducts.	[Pt](N)(Cl)(Cl)N	199	http://www.selleckchem.com/products/Cisplatin.html	DNA Damage
42	S1065	GDC-0941	C13	C	13	384-L1700-01	513.64	957054-30-7	free base	PI3K	GDC-0941 is a potent inhibitor of PI3Kα/δ with IC50 of 3 nM, with modest selectivity against p110β (11-fold) and p110γ (25-fold).	C1(=CC=CC2=C1C=NN2)C3=NC(=C4C(=N3)C=C(S4)CN5CCN(CC5)S(=O)(=O)C)N6CCOCC6	85	http://www.selleckchem.com/products/GDC-0941.html	PI3K/Akt/mTOR
42	S1174	MK-2866 (GTx-024)	C14	C	14	384-L1700-01	389.33	841205-47-8	free base	Androgen Receptor	MK-2866 (GTx-024) is a selective androgen receptor modulator (SARM) with Ki of 3.8 nM, and is tissue-selective for anabolic organs. Phase 3.	C([C@@](COC1C=CC(=CC=1)C#N)(C)O)(=O)NC2C=C(C(=CC=2)C#N)C(F)(F)F	200	http://www.selleckchem.com/products/Ostarine.html	Endocrinology & Hormones
50	S1075	SB216763	C15	C	15	384-L1700-01	371.22	280744-09-4	free base	GSK-3	SB216763 is a potent and selective GSK-3 inhibitor with IC50 of 34.3 nM for GSK-3α and equally effective at inhibiting human GSK-3β.	C1=CC=CC2=C1N(C=C2C3=C(C(NC3=O)=O)C4=CC=C(C=C4Cl)Cl)C	61	http://www.selleckchem.com/products/SB-216763.html	PI3K/Akt/mTOR
50	S1185	Ritonavir	C16	C	16	384-L1700-01	720.94	155213-67-5	free base	HIV Protease	Ritonavir is an antiretroviral drug which inhibits a particular liver enzyme that normally metabolizes protease inhibitors, cytochrome P450-3A4 (CYP3A4).	C1=CC=CC=C1C[C@@H]([C@H](C[C@H](CC2=CC=CC=C2)NC([C@@H](NC(N(CC3=CSC(=N3)C(C)C)C)=O)C(C)C)=O)O)NC(OCC4=CN=CS4)=O	138	http://www.selleckchem.com/products/Ritonavir.html	Proteases
58	S1087	Iniparib (BSI-201)	C17	C	17	384-L1700-01	292.03	160003-66-7	free base	PARP	BSI-201 (Iniparib, SAR240550) is a PARP1 inhibitor with demonstrated effectiveness in triple-negative breast cancer (TNBC). Phase 3.	C1=CC(=C(C=C1C(N)=O)[N+](=O)[O-])I	198	http://www.selleckchem.com/products/BSI-201.html	DNA Damage
58	S1194	CUDC-101	C18	C	18	384-L1700-01	434.49	1012054-59-9	free base	HDAC,HER2,EGFR	CUDC-101 is a potent multi-targeted inhibitor against HDAC, EGFR and HER2 with IC50 of 4.4 nM, 2.4 nM, and 15.7 nM, and inhibits class I/II HDACs, but not class III, Sir-type HDACs. Phase 1.	C12=C(N=CN=C1NC3=CC(=CC=C3)C#C)C=C(C(=C2)OCCCCCCC(NO)=O)OC	46	http://www.selleckchem.com/products/CUDC-101.html	Epigenetics
66	S1095	LAQ824 (Dacinostat)	C19	C	19	384-L1700-01	379.459	404951-53-7	free base	HDAC	LAQ824 (Dacinostat) is a novel HDAC inhibitor with IC50 of 32 nM and is known to activate the p21 promoter.	C1(=CC=C(C=C1)CN(CCO)CCC2=CNC3=C2C=CC=C3)/C=C/C(NO)=O	200	http://www.selleckchem.com/products/LAQ824(NVP-LAQ824).html	Epigenetics
66	S1202	Dutasteride	C20	C	20	384-L1700-01	528.53	164656-23-9	free base	5-alpha Reductase	Dutasteride is a dual 5-α reductase inhibitor that inhibits conversion of testosterone to dihydrotestosterone (DHT).	C1C(N[C@]2([C@](C=1)([C@]3([C@@](CC2)([C@]4([C@](CC3)([C@@H](CC4)C(NC5=CC(=CC=C5C(F)(F)F)C(F)(F)F)=O)C)[H])[H])[H])C)[H])=O	117	http://www.selleckchem.com/products/Dutasteride.html	Endocrinology & Hormones
74	S1104	GDC-0879	C21	C	21	384-L1700-01	334.37	905281-76-7	free base	Raf	GDC-0879 is a novel, potent, and selective B-Raf inhibitor with IC50 of 0.13 nM with activity against c-Raf as well; no inhibition known to other protein kinases.	C(CN1N=C(C(=C1)C2=CC=C3C(=C2)CCC/3=N/O)C4C=CN=CC=4)O	200	http://www.selleckchem.com/products/GDC-0879.html	MAPK
74	S1212	Bendamustine HCl	C22	C	22	384-L1700-01	394.72	3543-75-7	hydrochloride	Others	Bendamustine HCL is a DNA-damaging agent with IC50 of 50 μM.	C1(=C(C=C2C(=C1)N(C(=N2)CCCC(O)=O)C)N(CCCl)CCCl).Cl	200	http://www.selleckchem.com/products/Bendamustine-Hydrochloride.html	Others
2	S1231	Topotecan HCl	D03	D	03	384-L1700-01	457.91	119413-54-6	hydrochloride	Topoisomerase	Topotecan (NSC 609699) is a topoisomerase I inhibitor for MCF-7 Luc cells and DU-145 Luc cells with IC50 of 13 nM and 2 nM, respectively.	C1(C=CC2C(C=1CN(C)C)=CC3=C(N=2)C4N(C3)C(C5=C(C=4)[C@](C(OC5)=O)(CC)O)=O)O.Cl	200	http://www.selleckchem.com/products/Topotecan-Hydrochloride.html	DNA Damage
2	S1381	Meropenem	D04	D	04	384-L1700-01	383.46	96036-03-2	free base	Others	Meropenem is an ultra-broad spectrum injectable antibiotic.	N12C(C(C1=O)C(C)O)C(C(=C2C(O)=O)SC3CC(NC3)C(=O)N(C)C)C	200	http://www.selleckchem.com/products/Meropenem.html	Others
10	S1247	Leflunomide	D05	D	05	384-L1700-01	270.21	75706-12-6	free base	Others	Leflunomide is an immunosuppressant agent. Its active metabolite is Teriflunomide.	C1(=CC=C(C=C1)C(F)(F)F)NC(C2C=NOC=2C)=O	199	http://www.selleckchem.com/products/Leflunomide.html	Others
10	S1392	Pelitinib (EKB-569)	D06	D	06	384-L1700-01	467.92	257933-82-7	free base	EGFR	Pelitinib (EKB-569) is a potent irreversible EGFR inhibitor with IC50 of 38.5 nM. Phase2.	C1(=C(C=C2C(=C1)N=CC(=C2NC3=CC(=C(C=C3)F)Cl)C#N)NC(/C=C/CN(C)C)=O)OCC	27	http://www.selleckchem.com/products/Pelitinib.html	Protein Tyrosine Kinase
18	S1257	Posaconazole	D07	D	07	384-L1700-01	700.78	171228-49-2	free base	Others	Posaconazole is a sterol C14ɑ demethylase inhibitor with an IC50 of 0.25 nM.	C1(=CC=C(C=C1)N2CCN(CC2)C3=CC=C(C=C3)OC[C@@H]4CO[C@](C4)(C5=CC=C(C=C5F)F)CN6N=CN=C6)N7C(N(N=C7)[C@H]([C@H](C)O)CC)=O	199	http://www.selleckchem.com/products/Posaconazole.html	Others
18	S1404	Trilostane	D08	D	08	384-L1700-01	329.43	13647-35-3	free base	Dehydrogenase	Trilostane is an inhibitor of 3 β-hydroxysteroid dehydrogenase used in the treatment of Cushing’s syndrome.	C1(=C([C@@]2([C@]3([C@](C1)([C@]4([C@@](CC3)([C@]5([C@](CC4)([C@@H](CC5)O)C)[H])[H])[H])C)O2)[H])O)C#N	200	http://www.selleckchem.com/products/Trilostane.html	Metabolism
26	S1267	Vemurafenib (PLX4032, RG7204)	D09	D	09	384-L1700-01	489.92	918504-65-1	free base	Raf	Vemurafenib (PLX4032, RG7204) is a novel and potent inhibitor of B-RafV600E with IC50 of 31 nM.	C1(=CN=C2C(=C1)C(=CN2)C(=O)C3=C(C(=CC=C3F)NS(=O)(=O)CCC)F)C4=CC=C(C=C4)Cl	200	http://www.selleckchem.com/products/PLX-4032.html	MAPK
26	S1426	Repaglinide	D10	D	10	384-L1700-01	452.59	135062-02-1	free base	Potassium Channel	Repaglinide is for the treatment of type II diabetes.	C1(=C(C=CC(=C1)CC(N[C@H](C2=CC=CC=C2N3CCCCC3)CC(C)C)=O)C(O)=O)OCC	201	http://www.selleckchem.com/products/Repaglinide.html	Transmembrane Transporters
34	S1282	Artemisinin	D11	D	11	384-L1700-01	282.33	63968-64-9	free base	Others	Artemisinin is a drug used to treat multi-drug resistant strains of falciparum malaria.	[C@@]12(O[C@@]3([C@]4([C@@](CC1)([C@H](CC[C@]4([C@@H](C(O3)=O)C)[H])C)[H])OO2)[H])C	201	http://www.selleckchem.com/products/Artemisinin.html	Others
34	S1441	Venlafaxine	D12	D	12	384-L1700-01	313.86	99300-78-4	hydrochloride	5-HT Receptor	Venlafaxine is an arylalkanolamine serotonin-norepinephrine reuptake inhibitor (SNRI).	C1(CCCCC1(C(CN(C)C)C2=CC=C(C=C2)OC)O).Cl	176	http://www.selleckchem.com/products/Venlafaxine-hydrochloride.html	Neuronal Signaling
42	S1291	Cetirizine DiHCl	D13	D	13	384-L1700-01	461.81	83881-52-1	hydrochloride	Histamine Receptor	Cetirizine DiHCl is an antihistamine.	C1(=CC=CC=C1C(C2=CC=C(C=C2)Cl)N3CCN(CC3)CCOCC(O)=O).Cl.Cl	199	http://www.selleckchem.com/products/Cetirizine-di-hcl.html	Neuronal Signaling
42	S1453	Tipifarnib	D14	D	14	384-L1700-01	489.4	192185-72-1	free base	Transferase	Tipifarnib (R115777) is a potent and specific farnesyltransferase (FTase) inhibitor with IC50 of 0.6 nM, its anti-proliferative effects are most prominent in H-ras or N-ras mutant cells. Phase 3.	C1=CC(=CC=C1[C@](C2=CN=CN2C)(C3=CC4=C(C=C3)N(C(C=C4C5=CC(=CC=C5)Cl)=O)C)N)Cl	28	http://www.selleckchem.com/products/Tipifarnib(R115777).html	Metabolism
50	S1305	Mercaptopurine (6-MP)	D15	D	15	384-L1700-01	152.18	50-44-2	free base	DNA/RNA Synthesis	Mercaptopurine is a widely used antileukemic agent and immunosuppressive drug that inhibits de novo purine synthesis through incorporation of thiopurine methyltransferase metabolites into DNA and RNA.	N1=CNC2=C(C1=S)NC=N2	197	http://www.selleckchem.com/products/Mercaptopurine.html	DNA Damage
50	S1462	AZD6482	D16	D	16	384-L1700-01	408.45	1173900-33-8	free base	PI3K	AZD6482 is a PI3Kβ inhibitor with IC50 of 10 nM, 8-, 87- and 109-fold more selective to PI3Kβ than PI3Kδ, PI3Kα and PI3Kγ. Phase 1.	C(C1C(=CC=CC=1)N[C@H](C)C2=CC(=CN3C(C=C(N=C32)N4CCOCC4)=O)C)(=O)O	200	http://www.selleckchem.com/products/azd6482.html	PI3K/Akt/mTOR
58	S1329	Etomidate	D17	D	17	384-L1700-01	244.29	33125-97-2	free base	GABA Receptor	Etomidate is a GABAA receptors agonist at GABAA receptors.	N1(C(=CN=C1)C(OCC)=O)C(C)C2=CC=CC=C2	200	http://www.selleckchem.com/products/Etomidate.html	Neuronal Signaling
58	S1474	GSK429286A	D18	D	18	384-L1700-01	432.37	864082-47-3	free base	ROCK	GSK429286A is a selective inhibitor of ROCK1 and ROCK2 with IC50 of 14 nM and 63 nM, respectively.	C1(CC(C(=C(N1)C)C(NC2=C(C=C3C(=C2)C=NN3)F)=O)C4=CC=C(C=C4)C(F)(F)F)=O	201	http://www.selleckchem.com/products/GSK429286A.html	Cell Cycle
66	S1343	Ginkgolide B	D19	D	19	384-L1700-01	424.4	15291-77-7	free base	PAFR	Ginkgolide B is a PAFR antagonist with IC50 of 3.6 μM.	C123[C@@H]([C@]4([C@@]([C@]51O[C@]6(C2([C@@H](C[C@@H]3OC5=O)C(C)(C)C)[C@@H](C(O6)=O)O)[H])([C@H](C(O4)=O)C)O)[H])O	200	http://www.selleckchem.com/products/Ginkgolide-B.html	Others
66	S1484	MC1568	D20	D	20	384-L1700-01	314.31	852475-26-4	free base	HDAC	MC1568 is a selective HDAC inhibitor for maize HD1-A with IC50 of 100 nM. It is 34-fold more selective for HD1-A than HD1-B.	C1=CC(=CC(=C1)C(/C=C/C2=CN(C(=C2)/C=C/C(NO)=O)C)=O)F	41	http://www.selleckchem.com/products/MC1568.html	Cytoskeletal Signaling
74	S1358	Loratadine	D21	D	21	384-L1700-01	382.88	79794-75-5	free base	Histamine Receptor	Loratadine is a selective inverse peripheral histamine H1-receptor agonist with an IC50 of >32 μM.	C1CN(CCC1=C2C3=C(CCC4=C2C=CC(=C4)Cl)C=CC=N3)C(=O)OCC	44	http://www.selleckchem.com/products/Loratadine.html	Neuronal Signaling
74	S1497	Pralatrexate	D22	D	22	384-L1700-01	477.47	146464-95-1	free base	DHFR	Pralatrexate(Folotyn) is an antifolate, and structurally a folate analog. Its IC50 is < 300 nM in some cell lines.	N1=C(N=C2C(=C1N)N=C(C=N2)CC(C3=CC=C(C=C3)C(N[C@@H](CCC(O)=O)C(=O)O)=O)CC#C)N	58	http://www.selleckchem.com/products/Pralatrexate(Folotyn).html	Metabolism
3	S1012	BMS-536924	E03	E	03	384-L1700-01	479.96	468740-43-4	Free Base	IGF-1R	BMS-536924 is an ATP-competitive IGF-1R/IR inhibitor with IC50 of 100 nM/73 nM, modest activity for Mek, Fak, and Lck with very little activity for Akt1, MAPK1/2.	C1(=CC(=C2C(=C1)NC(=N2)C3=C(C=CNC3=O)NC[C@H](C4=CC=CC(=C4)Cl)O)C)N5CCOCC5	96	www.selleckchem.com/products/BMS-536924.html	Protein Tyrosine Kinase
3	S1122	Mocetinostat (MGCD0103)	E04	E	04	384-L1700-01	396.44	726169-73-9	free base	HDAC	Mocetinostat (MGCD0103) is a potent HDAC inhibitor with most potency for HDAC1 with IC50 of 0.15 μM, 2- to 10- fold selectivity against HDAC2, 3, and 11, and no activity to HDAC4, 5, 6, 7, and 8. Phase 1/2.	C(C1C=CC(=CC=1)CNC2N=C(C=CN=2)C3C=NC=CC=3)(=O)NC4C(=CC=CC=4)N	32	http://www.selleckchem.com/products/MGCD0103(Mocetinostat).html	Epigenetics
11	S1023	Erlotinib HCl (OSI-744)	E05	E	05	384-L1700-01	429.9	183319-69-9	hydrochloride	Autophagy,EGFR	Erlotinib HCl (OSI-744) is an EGFR inhibitor with IC50 of 2 nM, >1000-fold more sensitive for EGFR than human c-Src or v-Abl. Phase 3.	C1(=CC=CC(=C1)C#C)NC2(=NC=NC3=C2C=C(C(=C3)OCCOC)OCCOC)C.Cl	10	http://www.selleckchem.com/products/Erlotinib-Hydrochloride.html	Protein Tyrosine Kinase
11	S1138	Brivanib Alaninate (BMS-582664)	E06	E	06	384-L1700-01	441.46	649735-63-7	alaninate	VEGFR,FGFR	Brivanib alaninate (BMS-582664) is the prodrug of BMS-540215, an ATP-competitive inhibitor against VEGFR2 with IC50 of 25 nM.	C12=C(C(=C(C=C1)OC3=NC=NN4C3=C(C(=C4)OC[C@@H](C)OC([C@@H](N)C)=O)C)F)C=C(N2)C	199	http://www.selleckchem.com/products/Brivanib-alaninate.html	Protein Tyrosine Kinase
19	S1034	NVP-AEW541	E07	E	07	384-L1700-01	439.55	475489-16-8	free base	IGF-1R	NVP-AEW541 is a potent inhibitor of IGF-1R with IC50 of 86 nM, 27-fold greater selectivity for IGF-1R than InsR.	C1=CC(=CC(=C1)OCC2=CC=CC=C2)C3=CN(C4=C3C(=NC=N4)N)[C@@H]5C[C@@H](C5)CN6CCC6	200	http://www.selleckchem.com/products/NVP-AEW541.html	Protein Tyrosine Kinase
19	S1147	Barasertib (AZD1152-HQPA)	E08	E	08	384-L1700-01	507.56	722544-51-6	free base	Aurora Kinase	AZD1152-HQPA (Barasertib) is a highly selective Aurora B inhibitor with IC50 of 0.37 nM, ~100 fold more selective for Aurora B over Aurora A.	C1(=CC=C2C(=C1)N=CN=C2NC3NN=C(C=3)CC(NC4=CC=CC(=C4)F)=O)OCCCN(CCO)CC	200	http://www.selleckchem.com/products/AZD1152-HQPA.html	Cell Cycle
27	S1043	Tandutinib (MLN518)	E09	E	09	384-L1700-01	562.7	387867-13-2	free base	FLT3	Tandutinib (MLN518, CT53518) is a potent FLT3 antagonist with IC50 of 0.22 μM, also inhibits PDGFR and c-Kit, 15 to 20-fold higher potency for FLT3 versus CSF-1R and >100-fold selectivity for the same target versus FGFR, EGFR and KDR. Phase 1/2.	C1=C(C(=CC2=C1N=CN=C2N3CCN(CC3)C(NC4=CC=C(C=C4)OC(C)C)=O)OC)OCCCN5CCCCC5	10	http://www.selleckchem.com/products/Tandutinib-(MLN518).html	Angiogenesis
27	S1157	CEP-18770 (Delanzomib)	E10	E	10	384-L1700-01	413.28	847499-27-8	free base	Proteasome	CEP-18770 is an orally active inhibitor of the chymotrypsin-like activity of proteasome with IC50 of 3.8 nM, with only marginal inhibition of the tryptic and peptidylglutamyl activities of the proteosome. Phase 1/2.	C([C@@H](C(C)C)B(O)O)NC([C@H]([C@@H](C)O)NC(=O)C1C=CC=C(N=1)C2C=CC=CC=2)=O	200	http://www.selleckchem.com/products/cep-18770.html	Proteases
35	S1053	Entinostat (MS-275)	E11	E	11	384-L1700-01	376.41	209783-80-2	free base	HDAC	Entinostat (MS-275) strongly inhibits HDAC1 and HDAC3 with IC50 of 0.51 μM and 1.7 μM, compared with HDACs 4, 6, 8, and 10. Phase 1/2.	C1=C(C=CC(=C1)C(NC2=CC=CC=C2N)=O)CNC(OCC3=CN=CC=C3)=O	199	http://www.selleckchem.com/products/MS-275.html	Epigenetics
35	S1167	CP-724714	E12	E	12	384-L1700-01	469.53	537705-08-1	free base	EGFR,HER2	CP-724,714 is a potent, selective inhibitor of HER2/ErbB2 with IC50 of 10 nM, >640-fold selectivity against EGFR, InsR, IRG-1R, PDGFR, VEGFR2, Abl, Src, c-Met etc. Phase 2.	C1(=CC=C2C(=C1)C(=NC=N2)NC3=CC=C(C(=C3)C)OC4=CC=C(N=C4)C)/C=C/CNC(COC)=O	200	http://www.selleckchem.com/products/CP-724714.html	Protein Tyrosine Kinase
43	S1066	SL-327	E13	E	13	384-L1700-01	335.35	305350-87-2	free base	MEK	SL327 is a selective inhibitor for MEK1/2 with IC50 of 0.18 μM/ 0.22 μM, no activity towards Erk1, MKK3, MKK4, c-JUN, PKC, PKA, or CamKII;capable of transport through the blood-brain barrier.	C1=CC=CC(=C1C(F)(F)F)/C(=C(/SC2=CC=C(C=C2)N)N)C#N	11	http://www.selleckchem.com/products/SL327.html	MAPK
43	S1175	BIIB021	E14	E	14	384-L1700-01	318.76	848695-25-0	free base	HSP (e.g. HSP90)	BIIB021 is an orally available, fully synthetic small-molecule inhibitor of HSP90 with Ki and EC50 of 1.7 nM and 38 nM, respectively.	N1=C(N=C2C(=C1Cl)N=CN2CC3=C(C(=C(C=N3)C)OC)C)N	200	http://www.selleckchem.com/products/BIIB021.html	Cytoskeletal Signaling
51	S1076	SB203580	E15	E	15	384-L1700-01	377.43	152121-47-6	free base	p38 MAPK	SB203580 is a p38 MAPK inhibitor with IC50 of 0.3-0.5 μM, 10-fold less sensitive to SAPK3(106T) and SAPK4(106T) and blocks PKB phosphorylation with IC50 of 3-5 μM.	N1=CC=C(C=C1)C2=C(N=C(N2)C3=CC=C(C=C3)S(C)=O)C4=CC=C(C=C4)F	198	http://www.selleckchem.com/products/SB-203580.html	MAPK
51	S1186	BIBR 1532	E16	E	16	384-L1700-01	331.36	321674-73-1	free base	Telomerase	BIBR 1532 is a potent, selective, non-competitive telomerase inhibitor with IC50 of 100 nM.	C1=CC=C2C(=C1)C=C(C=C2)/C(=C/C(NC3=C(C=CC=C3)C(=O)O)=O)C	199	http://www.selleckchem.com/products/BIBR1532.html	DNA Damage
59	S1088	NVP-ADW742	E17	E	17	384-L1700-01	453.58	475488-23-4	free base	IGF-1R	NVP-ADW742 is an IGF-1R inhibitor with IC50 of 0.17 μM, >16-fold more potent against IGF-1R than InsR; little activity to HER2, PDGFR, VEGFR-2, Bcr-Abl and c-Kit.	C12=C(N=CN=C1N)N(C=C2C3=CC(=CC=C3)OCC4=CC=CC=C4)[C@@H]5C[C@H](C5)CN6CCCC6	22	http://www.selleckchem.com/products/NVP-ADW742.html	Protein Tyrosine Kinase
59	S1195	TAK-700 (Orteronel)	E18	E	18	384-L1700-01	307.35	426219-18-3	free base	P450 (e.g. CYP17)	TAK-700 (Orteronel) is a potent and highly selective human 17,20-lyase inhibitor with IC50 of 38 nM, exhibits >1000-fold selectivity over other CYPs (e.g. 11-hydroxylase and CYP3A4). Phase 3.	C1=C(C=C2C(=C1)C=C(C=C2)C3(C4N(CC3)C=NC=4)O)C(NC)=O	198	http://www.selleckchem.com/products/TAK-700.html	Metabolism
67	S1096	Quisinostat (JNJ-26481585)	E19	E	19	384-L1700-01	394.476	875320-29-9	free base	HDAC	JNJ-26481585 is a novel second-generation HDAC inhibitor with highest potency for HDAC1 with IC50 of 0.11 nM, modest potent to HDACs 2, 4, 10, and 11; greater than 30-fold selectivity against HDACs 3, 5, 8, and 9 and lowest potency to HDACs 6 and 7. Phase 2.	C1=CC=C2C(=C1)C(=CN2C)CNCC3CCN(CC3)C4=NC=C(C=N4)C(=O)NO	200	http://www.selleckchem.com/products/JNJ-26481585.html	Epigenetics
67	S1204	Melatonin	E20	E	20	384-L1700-01	232.28	73-31-4	free base	Others	Melatonin is a hormone produced in the brain by the pineal gland from the amino acid tryptophan.	C1=CC(=CC2=C1NC=C2CCNC(=O)C)OC	202	http://www.selleckchem.com/products/Melatonin.html	Others
75	S1105	LY294002	E21	E	21	384-L1700-01	307.34	154447-36-6	free base	Autophagy,PI3K	LY294002 is the first synthetic molecule known to inhibit PI3Kα/δ/β with IC50 of 0.5 μM/0.57 μM/0.97 μM, respectively; more stable in solution than Wortmannin, and also blocks autophagosome formation.	C1=CC(=C2C(=C1)C(C=C(O2)N3CCOCC3)=O)C4=CC=CC=C4	117	http://www.selleckchem.com/products/LY294002.html	PI3K/Akt/mTOR
75	S1213	Nelarabine	E22	E	22	384-L1700-01	297.27	121032-29-9	free base	DNA/RNA Synthesis	Nelarabine is a purine nucleoside analog and DNA synthesis inhibitor with IC50 from 0.067-2.15 μM in tumor cells.	N1C(=NC2=C(C=1OC)N=CN2[C@H]3[C@H]([C@@H]([C@H](O3)CO)O)O)N	201	http://www.selleckchem.com/products/Arranon.html	DNA Damage
3	S1233	2-Methoxyestradiol (2-MeOE2)	F03	F	03	384-L1700-01	302.41	362-07-2	free base	HIF	2-Methoxyestradiol depolymerizes microtubules and blocks HIF-1α nuclear accumulation and HIF-transcriptional activity. Phase 2.	C1(=C(C=C2C(=C1)[C@]3([C@@](CC2)([C@]4([C@](CC3)([C@@H](CC4)O)C)[H])[H])[H])O)OC	201	http://www.selleckchem.com/products/2-Methoxyestradiol(2ME2).html	Angiogenesis
3	S1382	Mianserin HCl	F04	F	04	384-L1700-01	300.83	21535-47-7	hydrochloride	Histamine Receptor	Mianserin HCl is a psychoactive agent of the tetracyclic antidepressant.	C12(N3C(C4=C(CC=1C=CC=C2)C=CC=C4)CN(CC3)C).Cl	199	http://www.selleckchem.com/products/Mianserin-hydrochloride.html	Neuronal Signaling
11	S1248	Vinblastine	F05	F	05	384-L1700-01	810.97	865-21-4	free base	Microtubule Associated	Vinblastine inhibits microtubule formation and supresses nAChR activity with IC50 of 8.9 μM.Phase 2.	C123[C@]4(N(CC1)CC=C[C@@]4(CC)[C@@H]([C@]([C@@]2(N(C5C3=CC(=C(C=5)OC)[C@@]6(C7NC8=CC=CC=C8C=7CC[N@]9C[C@](C[C@](C6)([H])C9)(O)CC)C(OC)=O)C)[H])(O)C(=O)OC)OC(=O)C)[H]	83	http://www.selleckchem.com/products/Vinblastine.html	Cytoskeletal Signaling
11	S1393	Pirarubicin	F06	F	06	384-L1700-01	627.64	72496-41-4	free base	Topoisomerase	Pirarubicin is an anthracycline agent.	[C@@H]1([C@H]([C@H](C[C@@H](O1)O[C@@]2(C3=C(C[C@](C2)(C(CO)=O)O)C(=C4C(=C3O)C(C5=C(C4=O)C=CC=C5OC)=O)O)[H])N)O[C@H]6OCCCC6)C	159	http://www.selleckchem.com/products/Pirarubicin.html	DNA Damage
19	S1258	Prasugrel	F07	F	07	384-L1700-01	373.44	150322-43-3	free base	P2 Receptor	A novel platelet inhibitor	C(C(C1C(=CC=CC=1)F)N2CCC3=C(C2)C=C(S3)OC(=O)C)(C4CC4)=O	80	http://www.selleckchem.com/products/Prasugrel.html	Neuronal Signaling
19	S1405	Vecuronium Bromide	F08	F	08	384-L1700-01	637.73	50700-72-6	bromide	Others	Vecuronium Bromide is a muscle relaxant in the category of non-depolarizing blocking agents.	C1(CCN(CC1)[C@@H]2[C@H](C[C@]3([C@](C2)([C@]4([C@@](CC3)([C@]5([C@](CC4)([C@@H]([C@H](C5)[N+]6(CCCCC6)C)OC(C)=O)C)[H])[H])[H])C)[H])OC(C)=O).[Br-]	200	http://www.selleckchem.com/products/Vecuronium-Bromide.html#	Others
27	S1271	Acarbose	F09	F	09	384-L1700-01	645.6	56180-94-0	free base	Others	Acarbose is an anti-diabetic drug used to treat type 2 diabetes mellitus and, in some countries, prediabetes.	[C@@H]1([C@@H]([C@H]([C@H](O[C@H]1C)O[C@H]2[C@@H]([C@H]([C@H](O[C@H]2CO)O[C@H]3[C@@H]([C@H]([C@@H](O[C@H]3CO)O)O)O)O)O)O)O)N[C@H]4C=C([C@H]([C@@H]([C@@H]4O)O)O)CO	199	http://www.selleckchem.com/products/Acarbose.html	Others
27	S1430	Rolipram	F10	F	10	384-L1700-01	275.34	61413-54-5	free base	PDE	Rolipram is a PDE4-inhibitor and an anti-inflammatory agent.Phase 1.	C1(=C(C=CC(=C1)C2CNC(C2)=O)OC)OC3CCCC3	199	http://www.selleckchem.com/products/Rolipram.html	Metabolism
35	S1283	Asenapine	F11	F	11	384-L1700-01	401.84	85650-56-2	maleate	5-HT Receptor,Adrenergic Receptor	Asenapine inhibits adrenergic receptor (α1, α2A, α2B, α2C) with Ki of 0.25-1.2 nM and also inhibits 5-HT receptor (1A, 1B, 2A, 2B, 2C, 5A, 6, 7) with Ki of 0.03-4.0 nM.	C12(=C([C@@]3([C@@](C4=C(O1)C=CC(=C4)Cl)(CN(C3)C)[H])[H])C=CC=C2).C(/C=C\C(=O)O)(=O)O	199	http://www.selleckchem.com/products/Asenapine.html	Neuronal Signaling
35	S1442	Voriconazole	F12	F	12	384-L1700-01	349.31	137234-62-9	free base	P450 (e.g. CYP17)	Voriconazole is a new triazole derivative similar to fluconazole and itraconazole that acts by inhibiting fungal cytochrome P-450-dependent, 14-alpha-sterol demethylase-mediated synthesis of ergosterol.	C1=C(C(=CC(=C1)F)F)[C@@](CN2C=NC=N2)([C@H](C3=NC=NC=C3F)C)O	200	http://www.selleckchem.com/products/Voriconazole.html	Metabolism
43	S1293	Cilnidipine	F13	F	13	384-L1700-01	492.52	132203-70-4	free base	Calcium Channel	Cilnidipine is a calcium channel blocker.	C1=CC=C(C=C1C2C(=C(NC(=C2C(OCCOC)=O)C)C)C(OC/C=C/C3=CC=CC=C3)=O)[N+](=O)[O-]	201	http://www.selleckchem.com/products/Cilnidipine.html	Transmembrane Transporters
43	S1454	PHA-680632	F14	F	14	384-L1700-01	501.62	398493-79-3	free base	Aurora Kinase	PHA-680632 is potent inhibitor of Aurora A, Aurora B and Aurora C with IC50 of 27 nM, 135 nM and 120 nM, respectively. It has 10- to 200-fold higher IC50 for FGFR1, FLT3, LCK, PLK1, STLK2, and VEGFR2/3.	C1(=CC=C(C=C1)C(=O)NC2C3=C(NN=2)CN(C3)C(=O)NC4=C(C=CC=C4CC)CC)N5CCN(CC5)C	199	http://www.selleckchem.com/products/PHA-680632.html	Cell Cycle
51	S1312	Streptozotocin (STZ)	F15	F	15	384-L1700-01	265.22	18883-66-4	free base	Others	Streptozotocin is a glucosamine-nitrosourea derivative, which is a methylating, carcinogenic, antibiotic and diabetes inducing agent.	[C@H]1([C@@H]([C@H]([C@@H]([C@H](O1)CO)O)O)NC(N(N=O)C)=O)O	199	http://www.selleckchem.com/products/Streptozotocin.html	Others
51	S1465	Moxifloxacin HCl	F16	F	16	384-L1700-01	437.89	186826-86-8	hydrochloride	Topoisomerase	Moxifloxacin is a fourth-generation synthetic fluoroquinolone antibacterial agent.	C1(=C(C(=C2C(=C1)C(C(=CN2C3CC3)C(O)=O)=O)OC)N4C[C@@]5([C@](C4)(CCCN5)[H])[H])F.Cl	200	http://www.selleckchem.com/products/Moxifloxacin.html	DNA Damage
59	S1330	Felbamate	F17	F	17	384-L1700-01	238.24	25451-15-4	free base	Others	Felbamate (Felbatol) is an anticonvulsant drug used in the treatment of epilepsy.	C1=CC=CC=C1C(COC(N)=O)COC(N)=O	201	http://www.selleckchem.com/products/Felbamate.html	Others
59	S1475	Pimasertib (AS-703026)	F18	F	18	384-L1700-01	431.2	1236699-92-5	free base	MEK	AS-703026 is a highly selective, potent, ATP non-competitive allosteric inhibitor of MEK1/2 with IC50 of 5 nM-2 μM in MM cell lines. Phase 1/2.	C1=C(C=CC(=C1F)NC2=CN=CC=C2C(NC[C@@H](CO)O)=O)I	199	http://www.selleckchem.com/products/AS703026.html	MAPK
67	S1344	Glimepiride	F19	F	19	384-L1700-01	490.62	93479-97-1	free base	DPP-4	Glimepiride is a medium-to-long acting sulfonylurea anti-diabetic compound with an ED50 of 182 μg/kg.	C1=C(C=CC(=C1)S(NC(N[C@@H]2CC[C@H](CC2)C)=O)(=O)=O)CCNC(N3CC(=C(C3=O)CC)C)=O	22	http://www.selleckchem.com/products/Glimepiride.html	Proteases
67	S1485	HMN-214	F20	F	20	384-L1700-01	424.47	173529-46-9	free base	PLK	HMN-214 is a prodrug of HMN-176, which alters the cellular spatial orientation of Plk1.	C1=CC=CC(=C1N(S(C2=CC=C(C=C2)OC)(=O)=O)C(C)=O)/C=C/C3=CC=[N+](C=C3)[O-]	28	http://www.selleckchem.com/products/HMN-214.html	Cell Cycle
75	S1359	Losartan Potassium (DuP 753)	F21	F	21	384-L1700-01	462.01	124750-99-8	potassium	RAAS	Losartan is an angiotensin II receptor antagonist, competes with the binding of angiotensin II to AT1 receptors with IC50 of 20 nM.	C1(=CC(=CC=C1C2=C(C=CC=C2)C3NN=NN=3)CN4C(=C(N=C4CCCC)Cl)CO).[K]	199	http://www.selleckchem.com/products/losartan-potassium.html	Endocrinology & Hormones
75	S1500	Betamethasone	F22	F	22	384-L1700-01	392.46	378-44-9	free base	Others	Betamethasone is a glucocorticoid steroid with anti-inflammatory and immunosuppressive properties.	C1C(C=C2[C@](C=1)([C@]3([C@@](CC2)([C@]4([C@](C[C@H]3O)([C@@]([C@H](C4)C)(C(CO)=O)O)C)[H])[H])F)C)=O	201	http://www.selleckchem.com/products/Betamethasone-(Celestone).html	Others
4	S1013	Bortezomib (PS-341)	G03	G	03	384-L1700-01	384.24	179324-69-7	free base	Proteasome	Bortezomib (PS-341) is a potent 20S proteasome inhibitor with Ki of 0.6 nM.	C1=CN=CC(=N1)C(N[C@H](C(N[C@H](B(O)O)CC(C)C)=O)CC2=CC=CC=C2)=O	200	http://www.selleckchem.com/products/Bortezomib.html	Proteases
4	S1124	BMS-754807	G04	G	04	384-L1700-01	461.49	1001350-96-4	free base	IGF-1R,Trk receptor,c-Met	BMS-754807 is a potent and reversible inhibitor of IGF-1R/InsR with IC50 of 1.8 nM/1.7 nM, less potent to Met, Aurora A/B, TrkA/B and Ron, and shows little activity to Flt3, Lck, MK2, PKA, PKC etc. Phase 1/2.	C12N(N=C(N=C1NC3C=C(NN=3)C4CC4)N5CCC[C@]5(C)C(=O)NC6=CC=C(N=C6)F)C=CC=2	199	http://www.selleckchem.com/products/BMS-754807.html	Protein Tyrosine Kinase
12	S1025	Gefitinib (ZD1839)	G05	G	05	384-L1700-01	446.9	184475-35-2	free base	EGFR	Gefitinib (ZD-1839) is an EGFR inhibitor for Tyr1173, Tyr992, Tyr1173 and Tyr992 in the NR6wtEGFR and NR6W cells with IC50 of 37 nM, 37nM, 26 nM and 57 nM, respectively.	C1(=C(C=C2C(=C1)N=CN=C2NC3=CC=C(C(=C3)Cl)F)OCCCN4CCOCC4)OC	199	http://www.selleckchem.com/products/Gefitinib.html	Protein Tyrosine Kinase
12	S1139	ADL5859 HCl	G06	G	06	384-L1700-01	428.95	850173-95-4	hydrochloride	Opioid Receptor	ADL5859 HCl is a δ-opioid receptor agonist with Ki of 0.8 nM, selectivity against opioid receptor κ, μ, and weak inhibitory activity at the hERG channel. Phase 2.	C1(=CC=C2C(=C1O)C(=CC3(O2)CCNCC3)C4=CC=C(C=C4)C(=O)N(CC)CC).Cl	200	http://www.selleckchem.com/products/ADL-5859.html	Neuronal Signaling
20	S1035	Pazopanib HCl (GW786034 HCl)	G07	G	07	384-L1700-01	473.98	635702-64-6	hydrochloride	VEGFR,PDGFR,c-Kit	Pazopanib (GW786034) is a novel multi-target inhibitor of VEGFR1, VEGFR2, VEGFR3, PDGFR, FGFR, c-Kit and c-Fms with IC50 of 10 nM, 30 nM, 47 nM, 84 nM, 74 nM, 140 nM and 146 nM, respectively.	C1(=C(C(=CC(=C1)NC2=NC=CC(=N2)N(C3C=CC4C(C=3)=NN(C=4C)C)C)S(=O)(N)=O)C).Cl	35	http://www.selleckchem.com/products/Pazopanib-Hydrochloride.html	Protein Tyrosine Kinase
20	S1148	Docetaxel	G08	G	08	384-L1700-01	807.88	114977-28-5	free base	Microtubule Associated	Docetaxel, an analog of taxol, is an inhibitor of depolymerisation of microtubules by binding to stabilized microtubules.	C1=CC=CC=C1C(=O)O[C@H]2[C@]3(C[C@H](C(=C([C@H](C([C@]4([C@H](C[C@@H]5[C@](C42)(OC(C)=O)CO5)O)C)=O)O)C(C)(C)3)C)OC([C@@H]([C@H](C6=CC=CC=C6)NC(OC(C)(C)C)=O)O)=O)O	200	http://www.selleckchem.com/products/Docetaxel(Taxotere).html	Cytoskeletal Signaling
28	S1044	Temsirolimus (CCI-779, NSC 683864)	G09	G	09	384-L1700-01	1030.29	162635-04-3	free base	mTOR	Temsirolimus (CCI-779) is a specific mTOR inhibitor with IC50 of 1.76 μM.	[C@H]1(C[C@@H](CC[C@@H]1OC(C(CO)(CO)C)=O)C[C@H]([C@@H]2CC([C@@H](/C=C(/[C@H]([C@@H](OC)C([C@@H](C[C@@H](/C=C/C=C/C=C(/[C@H](C[C@]3(CC[C@H]([C@](C(C(N4[C@](C(O2)=O)(CCCC4)[H])=O)=O)(O3)O)C)[H])OC)C)C)C)=O)O)C)C)=O)C)OC	72	http://www.selleckchem.com/products/Temsirolimus.html	PI3K/Akt/mTOR
28	S1158	MK-8245	G10	G	10	384-L1700-01	467.25	1030612-90-8	free base	Dehydrogenase	MK-8245 is an liver-targeting inhibitor of stearoyl-CoA desaturase (SCD) with IC50 of 1 nM for human SCD1 and 3 nM for both rat SCD1 and mouse SCD1, with anti-diabetic and anti-dyslipidemic efficacy. Phase 2.	N1N(N=NC=1C2=CC(=NO2)N3CCC(CC3)OC4C(=CC=C(C=4)F)Br)CC(=O)O	199	http://www.selleckchem.com/products/mk-8245.html	Metabolism
36	S1055	Enzastaurin (LY317615)	G11	G	11	384-L1700-01	515.61	170364-57-5	free base	PKC	Enzastaurin (LY317615) is a potent PKCβ selective inhibitor with IC50 of 6 nM, 6- to 20-fold selectivity against PKCα, PKCγ and PKCε. Phase 3.	C1=CC=C2C(=C1)C(=CN2C3CCN(CC3)CC4=NC=CC=C4)C5C(NC(C=5C6C7C(N(C=6)C)=CC=CC=7)=O)=O	58	http://www.selleckchem.com/products/Enzastaurin.html	TGF-beta/Smad
36	S1168	Valproic acid sodium salt (Sodium valproate)	G12	G	12	384-L1700-01	166.19	1069-66-5	free base	Autophagy,HDAC,GABA Receptor	Valproic acid sodium salt (Sodium valproate) is a HDAC inhibitor with IC50 of 0.4 mM and also inhibits GABA-transaminase or succinic semialdehyde dehydrogenase.	CCCC(C([O-])=O)CCC.[Na+]	198	http://www.selleckchem.com/products/Sodium-valproate.html	Neuronal Signaling
44	S1067	SB431542	G13	G	13	384-L1700-01	384.39	301836-41-9	free base	TGF-beta/Smad	SB431542 is a potent and selective inhibitor of ALK5 with IC50 of 94 nM, 100-fold more selective for ALK5 than p38 MAPK and other kinases.	C1=CC=CC(=N1)C2NC(=NC=2C3=CC4=C(C=C3)OCO4)C5=CC=C(C=C5)C(=O)N	200	http://www.selleckchem.com/products/SB-431542.html	TGF-beta/Smad
44	S1177	PD98059	G14	G	14	384-L1700-01	267.28	167869-21-8	free base	MEK	PD98059 is a non-ATP competitive MEK inhibitor with IC50 of 2 μM, specifically inhibits MEK-1-mediated activation of MAPK; does not directly inhibit ERK1 or ERK2.	C1=CC=C2C(=C1)C(C=C(O2)C3=CC=CC(=C3N)OC)=O	71	http://www.selleckchem.com/products/PD-98059.html	MAPK
52	S1077	SB202190 (FHPI)	G15	G	15	384-L1700-01	331.34	152121-30-7	free base	p38 MAPK	SB202190 (FHPI) is a potent p38 MAPK inhibitor targeting p38α/β with IC50 of 50 nM/100 nM, sometimes used instead of SB 203580 to investigate potential roles for SAPK2a/p38 in vivo.	C1=C(C=CC(=C1)C2N=C(NC=2C3=CC=NC=C3)C4=CC=C(C=C4)O)F	199	http://www.selleckchem.com/products/SB-202190.html	MAPK
52	S1188	Anastrozole	G16	G	16	384-L1700-01	293.37	120511-73-1	free base	Aromatase	Anastrozole is a third-generation nonsteroidal selective aromatase inhibitor.	C1=C(C=C(C=C1CN2C=NC=N2)C(C)(C)C#N)C(C)(C)C#N	201	http://www.selleckchem.com/products/Anastrozole.html	Endocrinology & Hormones
60	S1089	Refametinib (RDEA119, Bay 86-9766)	G17	G	17	384-L1700-01	572.34	923032-37-5	Free Base	MEK	Refametinib (RDEA119, Bay 86-9766) is a potent, ATP non-competitive and highly selective inhibitor of MEK1 and MEK2 with IC50 of 19 nM and 47 nM, respectively.	C1(=C(C=C(C(=C1NC2=CC=C(C=C2F)I)F)F)OC)NS(C3(C[C@@H](CO)O)CC3)(=O)=O	100	www.selleckchem.com/products/refametinib-rdea119-bay86-9766.html	MAPK
60	S1196	Exemestane	G18	G	18	384-L1700-01	296.4	107868-30-4	free base	Aromatase	Exemestane is an aromatase inhibitor, inhibits human placental and rat ovarian aromatase with IC50 of 30 nM and 40 nM, respectively.	C1(C=C[C@@]2([C@@]3(CC[C@]4(C(CC[C@@]([C@](CC(C(=C1)2)=C)3[H])4[H])=O)C)[H])C)=O	182	http://www.selleckchem.com/products/Exemestane.html	Endocrinology & Hormones
68	S1097	BTZ043 Racemate	G19	G	19	384-L1700-01	431.39	957217-65-1	Racemate	Others	BTZ043 racemate is a decaprenylphosphoryl-β-D-ribose 2'-epimerase (DprE1) inhibitor acting as a new antimycobacterial agent that kill Mycobacterium tuberculosis.	C1(=CC(=C2C(=C1)C(N=C(S2)N3CCC4(CC3)OCC(O4)C)=O)[N+](=O)[O-])C(F)(F)F	50	http://www.selleckchem.com/products/BTZ043.html	Others
68	S1205	PIK-75	G20	G	20	384-L1700-01	488.74	372196-77-5	hydrochloride	PI3K,DNA-PK	PIK-75 is a p110α inhibitor with IC50 of 5.8 nM (200-fold more potently than p110β), isoform-specific mutants at Ser773, and also potently inhibits DNA-PK with IC50 of 2 nM.	C1(C(=CN2C(C=1)=NC=C2/C=N/N(S(C3=C(C=CC(=C3)[N+](=O)[O-])C)(=O)=O)C)Br).Cl	10	http://www.selleckchem.com/products/PIK-75-Hydrochloride.html	PI3K/Akt/mTOR
76	S1106	OSU-03012 (AR-12)	G21	G	21	384-L1700-01	460.45	742112-33-0	free base	PDK-1	OSU-03012 is a potent inhibitor of recombinant PDK-1 with IC50 of 5 μM and 2-fold increase in potency over OSU-02067.	C12=C(C=CC3=C1C=CC(=C3)C4=CC(=NN4C5=CC=C(C=C5)NC(CN)=O)C(F)(F)F)C=CC=C2	23	http://www.selleckchem.com/products/OSU-03012.html	PI3K/Akt/mTOR
76	S1214	Bleomycin Sulfate	G22	G	22	384-L1700-01	1512.62	9041-93-4	sulfate	DNA/RNA Synthesis	Bleomycin Sulfate is a glycopeptide antibiotic and an anticancer agent for squamous cell carcinomas (SCC) with IC50 of 4 nM in UT-SCC-19A cells.	S(=O)(=O)(O)[O-].[C@H](C(C1N=CNC=1)O[C@@H]2[C@@]([C@@H]([C@H]([C@H](O2)CO)O)O)(O[C@@H]3[C@H]([C@H]([C@@H]([C@H](O3)CO)O)OC(N)=O)O)[H])(C(N[C@H]([C@@H]([C@H](C(N[C@H]([C@@H](C)O)C(NCCC4=NC(=CS4)C5=NC(=CS5)C(NCCC[S+](C)C)=O)=O)=O)C)O)C)=O)NC(C6N=C(N=C(C=6C)N)[C@@H](NC[C@H](C(N)=O)N)CC(N)=O)=O	66	http://www.selleckchem.com/products/Bleomycin-sulfate.html	DNA Damage
4	S1234	AG-1024	H03	H	03	384-L1700-01	305.17	65678-07-1	free base	IGF-1R	AG-1024 (Tyrphostin) inhibits IGF-1R autophosphorylation with IC50 of 7 μM, is less potent to IR with IC50 of 57 μM and specifically distinguishes between InsR and IGF-1R (as compared to other tyrphostins).	C(C(C#N)=CC1C=C(C(=C(C=1)C(C)(C)C)O)Br)#N	199	http://www.selleckchem.com/products/ag-1024-tyrphostin.html	Protein Tyrosine Kinase
4	S1385	Mosapride Citrate	H04	H	04	384-L1700-01	614.02	112885-42-4	citrate	5-HT Receptor	Mosapride Citrate is a gastroprokinetic agent that acts as a selective 5HT4 agonist.	C1(=C(C=C(C(=C1)C(NCC2OCCN(C2)CC3=CC=C(C=C3)F)=O)OCC)N)Cl.OC(CC(CC(O)=O)(C(=O)O)O)=O	146	http://www.selleckchem.com/products/Mosapride-citrate.html	Neuronal Signaling
12	S1249	JNJ-7706621	H05	H	05	384-L1700-01	394.36	443797-96-4	free base	CDK,Aurora Kinase	JNJ-7706621 is pan-CDK inhibitor with the highest potency on CDK1/2 with IC50 of 9 nM/4 nM and showing >6-fold selectivity for CDK1/2 than CDK3/4/6. It also potently inhibits Aurora A/B and has no activity on Plk1 and Wee1.	C1(=CC=C(C=C1)NC2N=C(N(N=2)C(C3=C(C=CC=C3F)F)=O)N)S(N)(=O)=O	200	http://www.selleckchem.com/products/JNJ-7706621.html	Cell Cycle
12	S1394	Pizotifen Malate	H06	H	06	384-L1700-01	429.53	5189-11-7	malate	Others	Pizotifen Malate is a benzocycloheptane based agent used for recurrent migraine headaches.	C1(C2=C(CCC3=C1C=CC=C3)SC=C2)=C4(CCN(CC4)C).C(C(CC(=O)O)O)(=O)O	48	http://www.selleckchem.com/products/Pizotifen-malate.html	Others
20	S1259	Ramelteon	H07	H	07	384-L1700-01	259.34	196597-26-9	free base	MT Receptor	Ramelteon is a novel melatonin receptor agonist for human MT1 and MT2 receptors and chick forebrain melatonin receptors with Ki of 14 pM, 112 pM and 23.1 pM, respectively.	C1=C2C(=C3C(=C1)CC[C@H]3CCNC(CC)=O)CCO2	200	http://www.selleckchem.com/products/Ramelteon.html	GPCR & G Protein
20	S1407	Bimatoprost	H08	H	08	384-L1700-01	415.57	155206-00-1	free base	Others	Bimatoprost is a prostaglandin analog used topically (as eye drops) to control the progression of glaucoma and in the management of ocular hypertension.	C1=CC=C(C=C1)CCC(O)/C=C/[C@@H]2[C@H]([C@H](C[C@H]2O)O)C/C=C\CCCC(=O)NCC	86	http://www.selleckchem.com/products/Bimatoprost.html	Others
28	S1274	BX-795	H09	H	09	384-L1700-01	591.47	702675-74-9	free base	IκB/IKK,PDK-1	BX795 is a potent and specific PDK1 inhibitor with IC50 of 6 nM, 140- and 1600-fold more selective for PDK1 than PKA and PKC, respectively. Meanwhile, in comparison to GSK3β more than 100-fold selectivity observed for PDK1.	N1(CCCC1)C(=O)NC2C=C(C=CC=2)NC3N=C(C(=CN=3)I)NCCCNC(C4=CC=CS4)=O	169	http://www.selleckchem.com/products/bx-795.html	PI3K/Akt/mTOR
28	S1431	Sildenafil Citrate	H10	H	10	384-L1700-01	666.7	171599-83-0	citrate	PDE	Sildenafil, a selective inhibitor of cyclic guanosine monophosphate (cGMP)-specific phosphodiesterase type 5 (PDE5), is a well-tolerated and highly effective treatment for erectile dysfunction.	C1(=CC=C(C(=C1)C2=NC3=C(C(N2)=O)N(N=C3CCC)C)OCC)S(N4CCN(CC4)C)(=O)=O.C(C(O)=O)C(CC(O)=O)(O)C(O)=O	34	http://www.selleckchem.com/products/Sildenafil-citrate.html	Metabolism
36	S1284	Benazepril HCl	H11	H	11	384-L1700-01	460.95	86541-74-4	hydrochloride	RAAS	Benazepril is a medication used to treat high blood pressure.	N1(C([C@H](CCC2=C1C=CC=C2)N[C@H](C(OCC)=O)CCC3=CC=CC=C3)=O)CC(O)=O.Cl	199	http://www.selleckchem.com/products/Benazepril-hydrochloride.html	Endocrinology & Hormones
36	S1443	Zileuton	H12	H	12	384-L1700-01	236.29	111406-87-2	free base	Others	Zileuton is an orally active inhibitor of 5-lipoxygenase, and thus inhibits leukotrienes (LTB4, LTC4, LTD4, and LTE4) formation.	C1=CC=C2C(=C1)SC(=C2)C(N(O)C(N)=O)C	198	http://www.selleckchem.com/products/Zileuton.html	Others
44	S1294	Cilostazol	H13	H	13	384-L1700-01	369.46	73963-72-1	free base	PDE	Cilostazol is a potent cyclic nucleotide phosphodiesterase type 3 (PDE3) inhibitor with IC50 of 0.2 μM and inhibitor of adenosine uptake.	C1C(NC2=C(C1)C=C(C=C2)OCCCCC3N(N=NN=3)C4CCCCC4)=O	200	http://www.selleckchem.com/products/Cilostazol.html	Metabolism
44	S1455	Cilomilast	H14	H	14	384-L1700-01	343.42	153259-65-5	free base	PDE	Cilomilast is a potent PDE4 inhibitor with IC50 of about 110 nM, has anti-inflammatory activity and low central nervous system activity.	C1(=C(C=CC(=C1)C2(CCC(CC2)(C(=O)O)[H])C#N)OC)OC3CCCC3	200	http://www.selleckchem.com/products/Cilomilast(SB-207499).html	Metabolism
52	S1315	Ki16425	H15	H	15	384-L1700-01	474.96	355025-24-0	free base	LPA Receptor	Ki16425 is a competitive, potent and reversible antagonist to LPA1, LPA2 and LPA3 with Ki of 0.34 μM, 6.5 μM and 0.93 μM, respectively, shows no activity at LPA4, LPA5, LPA6.	C1=CC=CC(=C1Cl)C(C)OC(=O)NC2C(=NOC=2C3=CC=C(C=C3)CSCCC(O)=O)C	200	http://www.selleckchem.com/products/Ki16425.html	GPCR & G Protein
52	S1466	Calcitriol	H16	H	16	384-L1700-01	416.64	32222-06-3	free base	Others	Calcitriol is the hormonally active form of vitamin D.	[C@@H]1(C[C@@H](C(/C(C1)=C\C=C2\[C@]3([C@](CCC2)([C@@H](CC3)[C@@H](CCCC(C)(C)O)C)C)[H])=C)O)O	199	http://www.selleckchem.com/products/Calcitriol-(Rocaltrol).html	Others
60	S1331	Fluconazole	H17	H	17	384-L1700-01	306.27	86386-73-4	free base	Others	Fluconazole is a triazole antifungal drug used in the treatment and prevention of superficial and systemic fungal infections.	C1(=C(C=C(C=C1)F)F)C(CN2N=CN=C2)(CN3N=CN=C3)O	199	http://www.selleckchem.com/products/Fluconazole.html	Others
60	S1476	SB525334	H18	H	18	384-L1700-01	343.42	356559-20-1	free base	TGF-beta/Smad	SB525334 is a potent and selective inhibitor of TGFβ receptor I (ALK5) with IC50 of 14.3 nM, is 4-fold less potent to ALK4 than ALK5 and inactive to ALK2, 3, and 6.	C1(=CC=C2C(=C1)N=CC=N2)C3NC(=NC=3C4=CC=CC(=N4)C)C(C)(C)C	200	http://www.selleckchem.com/products/SB-525334.html	TGF-beta/Smad
68	S1351	Ivermectin	H19	H	19	384-L1700-01	875.09	70288-86-7	free base	Others	Ivermectin is a broad-spectrum antiparasitic medication.	[C@]12([C@]3([C@@H](C(=C[C@@]1(C(O[C@@H]4C[C@]5(O[C@@](C4)(C/C=C(/[C@H]([C@H](/C=C/C=C/2CO3)C)O[C@]6(C[C@@H]([C@H]([C@@H](O6)C)O[C@]7(C[C@@H]([C@H]([C@@H](O7)C)O)OC)[H])OC)[H])C)[H])O[C@@]([C@H](CC5)C)([C@@H](C)CC)[H])=O)[H])C)O)[H])O	199	http://www.selleckchem.com/products/Ivermectin.html	Others
68	S1486	AEE788 (NVP-AEE788)	H20	H	20	384-L1700-01	440.58	497839-62-0	free base	HER2,VEGFR,EGFR	AEE788 is a potent inhibitor of EGFR and HER2/ErbB2 with IC50 of 2 nM and 6 nM, less potent to VEGFR2/KDR, c-Abl, c-Src, and Flt-1, does not inhibit Ins-R, IGF-1R, PKCα and CDK1. Phase 1/2.	C1=NC(=C2C(=N1)NC(=C2)C3=CC=C(C=C3)CN4CCN(CC4)CC)N[C@@H](C5=CC=CC=C5)C	199	http://www.selleckchem.com/products/AEE788.html	Protein Tyrosine Kinase
76	S1360	GSK1059615	H21	H	21	384-L1700-01	333.36	958852-01-2	free base	PI3K,mTOR	GSK1059615 is a dual inhibitor of PI3Kα/β/δ/γ (reversible) and mTOR with IC50 of 0.4 nM/0.6 nM/2 nM/5 nM and 12 nM, respectively. Phase 1.	C1(=CC=C2C(=C1)C(=CC=N2)C3=CC=NC=C3)/C=C4/C(NC(S4)=O)=O	10	http://www.selleckchem.com/products/GSK1059615.html	PI3K/Akt/mTOR
76	S1501	Mycophenolate Mofetil	H22	H	22	384-L1700-01	433.49	128794-94-5	free base	Dehydrogenase	Mycophenolate Mofetil is a non-competitive, selective and reversible inhibitor of inosine monophosphate dehydrogenase I/II with IC50 of 39 nM and 27 nM, respectively.	C12=C(C(=C(C(=C1O)C/C=C(/CCC(OCCN3CCOCC3)=O)C)OC)C)COC2=O	200	http://www.selleckchem.com/products/Mycophenolate-mofetil-(CellCept).html	Metabolism
5	S1014	Bosutinib (SKI-606)	I03	I	03	384-L1700-01	530.45	380843-75-4	free base	Src	Bosutinib (SKI-606) is a novel, dual Src/Abl inhibitor with IC50 of 1.2 nM and 1 nM, respectively.	N1=CC(=C(C2=CC(=C(C=C12)OCCCN3CCN(CC3)C)OC)NC4C(=CC(=C(C=4)OC)Cl)Cl)C#N	188	http://www.selleckchem.com/products/Bosutinib.html	Angiogenesis
5	S1129	SRT1720	I04	I	04	384-L1700-01	506.02	1001645-58-4	hydrochloride	Sirtuin	SRT1720 is a selective SIRT1 activator with EC50 of 0.16 μM, but is >230-fold less potent for SIRT2 and SIRT3.	N1(=C(C=NC2=CC=CC=C12)C(=O)NC3C(=CC=CC=3)C4N=C5SC=C(N5C=4)CN6CCNCC6).Cl	75	http://www.selleckchem.com/products/SRT1720.html	Epigenetics
13	S1026	Imatinib Mesylate (STI571)	I05	I	05	384-L1700-01	589.71	220127-57-1	mesylate	c-Kit,Bcr-Abl,PDGFR	Imatinib Mesylate (STI571) is an orally bioavailability mesylate salt of Imatinib, which is a multi-target inhibitor of v-Abl, c-Kit and PDGFR with IC50 of 0.6 μM, 0.1 μM and 0.1 μM, respectively.	C1(=CC=C(C(=C1)NC2=NC=CC(=N2)C3=CC=CN=C3)C)NC(=O)C4(=CC=C(C=C4)CN5CCN(CC5)C).OS(C)(=O)=O	200	http://www.selleckchem.com/products/Imatinib-Mesylate.html	Protein Tyrosine Kinase
13	S1140	Andarine	I06	I	06	384-L1700-01	441.36	401900-40-1	free base	Androgen Receptor	Andarine is a selective non-steroidal androgen receptor (AR) agonist with Ki of 4 nM, tissue-selective for anabolic organs.	C([C@@](COC1C=CC(=CC=1)NC(=O)C)(C)O)(=O)NC2C=C(C(=CC=2)[N+](=O)[O-])C(F)(F)F	199	http://www.selleckchem.com/products/Andarine.html	Endocrinology & Hormones
21	S1036	PD0325901	I07	I	07	384-L1700-01	482.19	391210-10-9	free base	MEK	PD0325901 (PD325901) is selective and non ATP-competitive MEK inhibitor with IC50 of 0.33 nM, roughly 500-fold more potent than CI-1040 on phosphorylation of ERK1 and ERK2. Phase 1/2.	C1=CC(=C(C(=C1C(=O)NOC[C@H](O)CO)NC2=CC=C(C=C2F)I)F)F	199	http://www.selleckchem.com/products/PD-0325901.html	MAPK
21	S1150	Paclitaxel	I08	I	08	384-L1700-01	853.91	33069-62-4	free base	Microtubule Associated,Autophagy	Paclitaxel is a microtubule polymer stabilizer with IC50 of 0.1 pM in human endothelial cells.	C1=CC=CC(=C1)C(=O)N[C@H]([C@H](C(O[C@H]2C[C@@]3(C(C(=C2C)[C@H](C(=O)[C@]4(C([C@]5([C@@H](C[C@H]4O)OC5)OC(C)=O)[C@@H]3OC(C6=CC=CC=C6)=O)C)OC(C)=O)(C)C)O)=O)O)C7=CC=CC=C7	200	http://www.selleckchem.com/products/Paclitaxel(Taxol).html	Cytoskeletal Signaling
29	S1045	Trichostatin A (TSA)	I09	I	09	384-L1700-01	302.4	58880-19-6	free base	HDAC	Trichostatin A (TSA) is an HDAC inhibitor with IC50 of ~1.8 nM – HDAC8 is the only known member of the HDAC-family that is not affected by TSA. Phase 3.	C1=C(C=CC(=C1)C([C@@H](/C=C(/C=C/C(NO)=O)C)C)=O)N(C)C	76	http://www.selleckchem.com/products/Trichostatin-A.html	Epigenetics
29	S1159	Ganetespib (STA-9090)	I10	I	10	384-L1700-01	364.4	888216-25-9	free base	HSP (e.g. HSP90)	Ganetespib is an HSP90 inhibitor with IC50 of 4 nM in OSA 8 cells, induces apoptosis of OSA cells while normal osteoblasts are not affected; active metabolite of STA-1474.	N1NC(N(C=1C2C(=CC(=C(C=2)C(C)C)O)O)C3=CC4C=CN(C(C=C3)=4)C)=O	109	http://www.selleckchem.com/products/ganetespib-sta-9090.html	Cytoskeletal Signaling
37	S1056	AC480 (BMS-599626)	I11	I	11	384-L1700-01	567.01	714971-09-2	free base	HER2,EGFR	AC480 (BMS-599626) is a selective and efficacious inhibitor of HER1 and HER2 with IC50 of 20 nM and 30 nM, ~8-fold less potent to HER4, >100-fold to VEGFR2, c-Kit, Lck, MET etc. Phase 1.	C1(CN[C@@H](CO1)COC(NC2=CN3C(=C2C)C(=NC=N3)NC4=CC5=C(C=C4)N(N=C5)CC6=CC(=CC=C6)F)=O).Cl	199	http://www.selleckchem.com/products/BMS-599626.html	Protein Tyrosine Kinase
37	S1169	TGX-221	I12	I	12	384-L1700-01	364.44	663619-89-4	free base	PI3K	TGX-221 is a p110β-specific inhibitor with IC50 of 5 nM, 1000-fold more selective for p110β than p110α.	C1=C(C=C(C2N1C(C=C(N=2)N3CCOCC3)=O)C(C)NC4=CC=CC=C4)C	32	http://www.selleckchem.com/products/TGX-221.html	PI3K/Akt/mTOR
45	S1068	Crizotinib (PF-02341066)	I13	I	13	384-L1700-01	450.34	877399-52-5	free base	c-Met,ALK	PF-2341066 (Crizotinib) is a potent inhibitor of c-Met and ALK with IC50 of 11 nM and 24 nM, respectivley.	C1(=CC(=C(N=C1)N)O[C@@H](C2=C(C=CC(=C2Cl)F)Cl)C)C3=CN(N=C3)C4CCNCC4	19	http://www.selleckchem.com/products/PF-2341066.html	Protein Tyrosine Kinase
45	S1178	Regorafenib (BAY 73-4506)	I14	I	14	384-L1700-01	482.82	755037-03-7	free base	c-RET,VEGFR	Regorafenib (BAY 73-4506) is a multi-target inhibitor for VEGFR1, VEGFR2, VEGFR3, PDGFRβ, Kit, RET and Raf-1 with IC50 of 13 nM/4.2 nM/46 nM, 22 nM, 7 nM, 1.5 nM and 2.5 nM, respectively.	C1=NC(=CC(=C1)OC2=CC(=C(C=C2)NC(NC3=CC=C(C(=C3)C(F)(F)F)Cl)=O)F)C(=O)NC	200	http://www.selleckchem.com/products/BAY-73-4506.html	Protein Tyrosine Kinase
53	S1078	MK-2206 2HCl	I15	I	15	384-L1700-01	480.39	1032350-13-2	dihydrochloride	Akt	MK-2206 2HCl is a highly selective inhibitor of Akt1/2/3 with IC50 of 8 nM/12 nM/65 nM, respectively; no inhibitory activities against 250 other protein kinases observed. Phase 2.	C1(=CC=CC=C1)C2(=C(N=C3C(=C2)C4N(C=C3)C(NN=4)=O)C5=CC=C(C=C5)C6(CCC6)N).Cl.Cl	29	http://www.selleckchem.com/products/MK-2206.html	PI3K/Akt/mTOR
53	S1189	Aprepitant	I16	I	16	384-L1700-01	534.43	170729-80-3	free base	Substance P	Aprepitant is a potent and selective neurokinin-1 receptor antagonist.	N1NC(NC=1CN2[C@H]([C@H](OCC2)O[C@@H](C)C3C=C(C=C(C=3)C(F)(F)F)C(F)(F)F)C4C=CC(=CC=4)F)=O	200	http://www.selleckchem.com/products/Aprepitant.html	Others
61	S1090	PCI-24781 (Abexinostat)	I17	I	17	384-L1700-01	397.42	783355-60-2	free base	HDAC	PCI-24781 is a novel pan-HDAC inhibitor mostly targeting HDAC1 with Ki of 7 nM, modest potent to HDACs 2, 3, 6, and 10 and greater than 40-fold selectivity against HDAC8. Phase 1/2.	C1=CC=C2C(=C1)OC(=C2CN(C)C)C(=O)NCCOC3=CC=C(C=C3)C(=O)NO	201	http://www.selleckchem.com/products/PCI-24781.html	Cytoskeletal Signaling
61	S1197	Finasteride	I18	I	18	384-L1700-01	372.54	98319-26-7	free base	5-alpha Reductase	Finasteride is an inhibitor of steroid Type II 5α-reductase.	C1C(N[C@]2([C@](C=1)([C@]3([C@@](CC2)([C@]4([C@](CC3)([C@@H](CC4)C(NC(C)(C)C)=O)C)[H])[H])[H])C)[H])=O	201	http://www.selleckchem.com/products/Finasteride.html	Endocrinology & Hormones
69	S1098	Rucaparib (AG-014699,PF-01367338)	I19	I	19	384-L1700-01	421.36	459868-92-9	phosphate	PARP	Rucaparib (AG-014699, PF-01367338) is an inhibitor of PARP with Ki of 1.4 nM for PARP1, also showing binding affinity to eight other PARP domains. Phase 1/2.	C1(C2C=CC(=CC=2)CNC)(=C3C4=C(N1)C=C(C=C4C(NCC3)=O)F).P(=O)(O)(O)O	199	http://www.selleckchem.com/products/AG-014699.html	DNA Damage
69	S1206	Bisoprolol fumarate	I20	I	20	384-L1700-01	441.52	104344-23-2	free base	Adrenergic Receptor	Bisoprolol is a selective type β1 adrenergic receptor blocker.	C1(=C(C=CC(=C1)OCC(O)CNC(C)C)COCCOC(C)C).OC(/C=C/C(O)=O)=O	199	http://www.selleckchem.com/products/Bisoprolol-Fumarate.html	Neuronal Signaling
77	S1107	Danusertib (PHA-739358)	I21	I	21	384-L1700-01	474.55	827318-97-8	free base	c-RET,FGFR,Bcr-Abl,Aurora Kinase	Danusertib (PHA-739358) is an Aurora kinase inhibitor for Aurora A/B/C with IC50 of 13 nM/79 nM/61 nM, modestly potent to Abl, TrkA, c-RET and FGFR1, and less potent to Lck, VEGFR2/3, c-Kit, CDK2, etc. Phase 2.	C1(=CC=CC=C1)[C@H](C(N2CC3=C(C2)C(=NN3)NC(=O)C4=CC=C(C=C4)N5CCN(CC5)C)=O)OC	200	http://www.selleckchem.com/products/PHA-739358(Danusertib).html	Cell Cycle
77	S1216	PFI-1 (PF-6405761)	I22	I	22	384-L1700-01	347.39	1403764-72-6	free base	Epigenetic Reader Domain	PFI-1 is a selective BET (bromodomain-containing protein) inhibitor for BRD4 with IC50 of 0.22 μM.	C1(=CC=C2C(=C1)CN(C(N2)=O)C)NS(=O)(=O)C3=C(C=CC=C3)OC	198	http://www.selleckchem.com/products/pfl-1.html	Epigenetics
5	S1235	Letrozole	J03	J	03	384-L1700-01	285.3	112809-51-5	free base	Aromatase	Letrozole is a third generation inhibitor of aromatase with IC50 of 0.07-20 nM.	C1=CC(=CC=C1C(N2N=CN=C2)C3=CC=C(C=C3)C#N)C#N	199	http://www.selleckchem.com/products/Letrozole.html	Endocrinology & Hormones
5	S1386	Nafamostat Mesylate	J04	J	04	384-L1700-01	539.58	82956-11-4	mesylate	Proteasome	Nafamostat Mesylate is an anticoagulant.Phase 4.	C1(=CC=C(C=C1)NC(=N)N)C(=O)OC2(=CC3=C(C=C2)C=C(C=C3)C(=N)N).S(O)(C)(=O)=O.S(O)(C)(=O)=O	37	http://www.selleckchem.com/products/Nafamostat-mesylate.html	Proteases
13	S1250	Enzalutamide (MDV3100)	J05	J	05	384-L1700-01	464.44	915087-33-1	free base	Androgen Receptor	Enzalutamide (MDV3100) is an androgen-receptor (AR) antagonist with IC50 of 36 nM.	C1(=C(C=CC(=C1)N2C(N(C(C2(C)C)=O)C3=CC=C(C(=C3)C(F)(F)F)C#N)=S)C(NC)=O)F	200	http://www.selleckchem.com/products/MDV3100.html	Endocrinology & Hormones
13	S1396	Resveratrol	J06	J	06	384-L1700-01	228.24	501-36-0	free base	Sirtuin,Autophagy	Resveratrol is a phytoalexin produced naturally by several plants with anti-cancer, anti-inflammatory, blood-sugar-lowering and other beneficial cardiovascular effects.	C1(=CC=C(C=C1)/C=C/C2=CC(=CC(=C2)O)O)O	201	http://www.selleckchem.com/products/Resveratrol.html	Epigenetics
21	S1260	Cinacalcet HCl	J07	J	07	384-L1700-01	393.87	364782-34-3	hydrochloride	CaSR	AMG-073 represents a new class of compounds for the treatment of hyperparathyroidism.	C1(=C(C=C(C=C1)CCCN[C@@](C2=CC=CC3=C2C=CC=C3)(C)[H])C(F)(F)F).Cl	200	http://www.selleckchem.com/products/Cinacalcet-hydrochloride.html	GPCR & G Protein
21	S1408	Linezolid	J08	J	08	384-L1700-01	337.35	165800-03-3	free base	Others	Linezolid is a synthetic antibiotic used for the treatment of serious infections.	C1=C(C(=CC(=C1)N2C[C@@H](OC2=O)CNC(C)=O)F)N3CCOCC3	201	http://www.selleckchem.com/products/Linezolid(Zyvox).html	Others
29	S1275	BX-912	J09	J	09	384-L1700-01	471.35	702674-56-4	free base	PDK-1	BX912 is a potent and specific PDK1 inhibitor with IC50 of 12 nM, 9- and 105- fold greater selectivity for PDK1 than PKA and PKC, respectively. In comparison to GSK3β, selectivity for PDK1 is 600-fold.	N1(CCCC1)C(=O)NC2C=C(C=CC=2)NC3N=C(C(=CN=3)Br)NCCC4=CN=CN4	199	http://www.selleckchem.com/products/bx-912.html	PI3K/Akt/mTOR
29	S1432	Sumatriptan Succinate	J10	J	10	384-L1700-01	413.49	103628-48-4	succinate	5-HT Receptor	Sumatriptan Succinate is a triptan sulfa drug containing a sulfonamide group for the treatment of migraine headaches.	C1(=CC=C2C(=C1)C(=CN2)CCN(C)C)CS(NC)(=O)=O.OC(CCC(O)=O)=O	200	http://www.selleckchem.com/products/Sumatriptan-succinate.html	Neuronal Signaling
37	S1285	Biperiden HCl	J11	J	11	384-L1700-01	347.92	1235-82-1	hydrochloride	AChR	Biperiden is an antiparkinsonian agent of the anticholinergic type.	C1(=CC(=CC=C1)C(CCN2CCCCC2)(C3CC4C=CC(C4)3)O).Cl	10	http://www.selleckchem.com/products/Biperiden-hydrochloride.html	Neuronal Signaling
37	S1444	Ziprasidone HCl	J12	J	12	384-L1700-01	449.4	122883-93-6	hydrochloride	Others	Ziprasidone HCl was the fifth atypical antipsychotic.	C1(=CC=CC2=C1C(=NS2)N3CCN(CC3)CCC4C(=CC5=C(C=4)CC(N5)=O)Cl).Cl	200	http://www.selleckchem.com/products/Ziprasidone-hydrochloride.html	Others
45	S1297	Epothilone A	J13	J	13	384-L1700-01	493.66	152044-53-6	free base	Microtubule Associated	Epothilone A is a Taxol-like microtubule-stabilizing agent with EC0.01 of 2 μM.	O1[C@@H]2CCC[C@@H]([C@@H]([C@H](C(C([C@@H](CC(O[C@H](C[C@H]12)/C(C)=C/C3N=C(SC=3)C)=O)O)(C)C)=O)C)O)C	200	http://www.selleckchem.com/products/Epothilone-A.html	Cytoskeletal Signaling
45	S1456	Zibotentan (ZD4054)	J14	J	14	384-L1700-01	424.43	186497-07-4	free base	Endothelin Receptor	Zibotentan (ZD4054) is a specific Endothelin (ET)A antagonist with IC50 of 21 nM, exhibiting no activity at ETB. Phase 3.	C1(C(=CC=CN=1)S(=O)(=O)NC2C(=NC(=CN=2)C)OC)C3C=CC(=CC=3)C4OC=NN=4	56	http://www.selleckchem.com/products/Zibotentan(ZD4054).html	GPCR & G Protein
53	S1319	Costunolide	J15	J	15	384-L1700-01	232.32	553-21-9	free base	Telomerase	Costunolide, a natural sesquiterpene compound with multiple biological activities; inhibits FPTase with IC50 of 20 μM, also inhibits telomerase with IC50 of 65-90 μM.	C1C/C(=C/[C@@H]2[C@@H](CC/C(=C/1)C)C(C(O2)=O)=C)C	202	http://www.selleckchem.com/products/Costunolide.html	DNA Damage
53	S1467	Doxercalciferol	J16	J	16	384-L1700-01	412.65	54573-75-0	free base	Others	Doxercalciferol is a synthetic analog of vitamin D.	C1[C@@H](C(/C(C[C@@H]1O)=C/C=C2\CCC[C@]3([C@]2(CC[C@]3([C@@H](/C=C/[C@H](C(C)C)C)C)[H])[H])C)=C)O	201	http://www.selleckchem.com/products/Doxercalciferol(Hectorol).html	Others
61	S1332	Flumazenil	J17	J	17	384-L1700-01	303.29	78755-81-4	free base	GABA Receptor	Flumazenil is a benzodiazepine antagonist.	C1=C(C=C2C(=C1)N3C(CN(C2=O)C)=C(N=C3)C(=O)OCC)F	16	http://www.selleckchem.com/products/Flumazenil.html	Neuronal Signaling
61	S1478	Oligomycin A	J18	J	18	384-L1700-01	791.06	579-13-5	free base	ATPase	Oligomycin A is an inhibitor of ATP synthase, inhibits oxidative phosphorylation and all the ATP-dependent processes occurring on the coupling membrane of mitochondria.	C1C[C@@]2(O[C@H]([C@@H]1C)C[C@@H](C)O)[C@H]([C@H]3[C@@]([C@@H](O2)CC[C@H](/C=C\C=C/C[C@H]([C@@H]([C@@](C([C@H]([C@]([C@H](C([C@H]([C@@H]([C@H](/C=C/C(O3)=O)C)O)C)=O)C)([H])O)C)=O)(C)O)O)C)CC)(C)[H])C	12	http://www.selleckchem.com/products/Oligomycin-A.html	Transmembrane Transporters
69	S1352	TG100-115	J19	J	19	384-L1700-01	346.34	677297-51-7	free base	PI3K	TG100115 is a PI3Kγ/δ inhibitor with IC50 of 83 nM/235 nM, with little effect on PI3Kα/β. Phase 1/2.	C1(=C(N=C2C(=N1)C(=NC(=N2)N)N)C3=CC=CC(=C3)O)C4=CC(=CC=C4)O	25	http://www.selleckchem.com/products/TG100-115.html	PI3K/Akt/mTOR
69	S1487	PHA-793887	J20	J	20	384-L1700-01	361.48	718630-59-2	free base	CDK	PHA-793887 is a novel and potent inhibitor of CDK2, CDK5 and CDK7 with IC50 of 8 nM, 5 nM and 10 nM. It is greater than 6-fold more selective for CDK2, 5, and 7 than CDK1, 4, and 9. Phase 1.	N1N=C(C2=C1C(N(C2)C(C3CCN(CC3)C)=O)(C)C)NC(CC(C)C)=O	199	http://www.selleckchem.com/products/PHA-793887.html	Cell Cycle
77	S1361	MGCD-265	J21	J	21	384-L1700-01	517.6	875337-44-3	free base	Tie-2,VEGFR,c-Met	MGCD-265 is a potent, multi-target and ATP-competitive inhibitor of c-Met and VEGFR1/2/3 with IC50 of 1 nM, 3 nM/3 nM/4 nM, respectively; also inhibits Ron and Tie2. Phase 1/2.	C1(=CC=CC=C1)CC(NC(NC2=CC=C(C(=C2)F)OC3=C4C(=NC=C3)C=C(S4)C5N=CN(C=5)C)=S)=O	200	http://www.selleckchem.com/products/MGCD-265.html	Protein Tyrosine Kinase
77	S1502	Cephalexin	J22	J	22	384-L1700-01	347.39	15686-71-2	free base	Others	Cefalexin is a cephalosporin antibiotic.	C1=CC=C(C=C1)[C@H](C(N[C@@H]2C(N3[C@]2(SCC(=C3C(=O)O)C)[H])=O)=O)N	10	http://www.selleckchem.com/products/Cephalexin-(Cefalexin).html	Others
6	S1017	Cediranib (AZD2171)	K03	K	03	384-L1700-01	450.51	288383-20-0	free base	VEGFR	Cediranib (AZD2171) is a highly potent VEGFR(KDR) inhibitor with IC50 of <1 nM, also inhibits Flt1/4 with IC50 of 5 nM/≤3 nM, similar activity against c-Kit and PDGFRβ, 36-, 110-fold and >1000-fold selective more for VEGFR than PDGFR-α, CSF-1R and Flt3, Phase 2/3.	C1(=C(C=C2C(=C1)C(=NC=N2)OC3=C(C4=C(C=C3)NC(=C4)C)F)OCCCN5CCCC5)OC	199	http://www.selleckchem.com/products/Cediranib.html	Protein Tyrosine Kinase
6	S1130	YM155 (Sepantronium Bromide)	K04	K	04	384-L1700-01	443.29	781661-94-7	bromide	Survivin	YM155 is a potent survivin suppressant by inhibiting Survivin promoter activity with IC50 of 0.54 nM; does not significantly inhibit SV40 promoter activity, but is observed to slightly inhibit the interaction of Survivin with XIAP. Phase 1/2.	C1(=CC=C2C(=C1)C(C3=C(C2=O)N(C(=N3CC4=NC=CN=C4)C)CCOC)=O).[Br-]	124	http://www.selleckchem.com/products/YM155.html	Apoptosis
14	S1028	Lapatinib (GW-572016) Ditosylate	K05	K	05	384-L1700-01	925.46	388082-77-7	ditosylat	HER2,EGFR	Lapatinib Ditosylate (GW572016, GW2016) is a potent EGFR and ErbB2 inhibitor with IC50 of 10.8 and 9.2 nM, respectively.	C1(=C(C=C2C(=C1)N=CN=C2NC3=CC=C(C(=C3)Cl)OCC4=CC=CC(=C4)F)C5OC(=CC=5)CNCCS(=O)(C)=O).C6(=C(C=CC(=C6)S(O)(=O)=O)C).C7=C(C=CC(=C7)S(O)(=O)=O)C	199	http://www.selleckchem.com/products/Lapatinib-Ditosylate.html	Protein Tyrosine Kinase
14	S1141	17-AAG (Tanespimycin)	K06	K	06	384-L1700-01	585.69	75747-14-7	free base	HSP (e.g. HSP90)	17-AAG is a potent HSP90 inhibitor with IC50 of 5 nM, having a 100-fold higher binding affinity for HSP90 derived from tumour cells than HSP90 from normal cells.	C1(=C2C(C(=CC1=O)NC(C(=C\C=C/[C@@H]([C@H](/C(=C/[C@@H]([C@H]([C@H](C[C@@H](C2)C)OC)O)C)C)OC(=O)N)OC)/C)=O)=O)NCC=C	199	http://www.selleckchem.com/products/17-AAG(Geldanamycin).html	Cytoskeletal Signaling
22	S1038	PI-103	K07	K	07	384-L1700-01	348.36	371935-74-9	free base	PI3K,Autophagy,DNA-PK,mTOR	PI-103 is a multi-targeted PI3K inhibitor for p110α/β/δ/γ with IC50 of 2 nM/3 nM/3 nM/15 nM, less potent to mTOR/DNA-PK with IC50 of 30 nM/23 nM.	C12=C(N=C(N=C1N3CCOCC3)C4=CC=CC(=C4)O)C5=C(O2)N=CC=C5	68	http://www.selleckchem.com/products/PI-103.html	PI3K/Akt/mTOR
22	S1152	PLX-4720	K08	K	08	384-L1700-01	413.83	918505-84-7	free base	Raf	PLX4720 is a potent and selective inhibitor of B-RafV600E with IC50 of 13 nM, equally potent to c-Raf-1(Y340D and Y341D mutations), 10-fold selectivity for B-RafV600E than wild-type B-Raf.	C1(=CN=C2C(=C1)C(=CN2)C(=O)C3=C(C(=CC=C3F)NS(=O)(=O)CCC)F)Cl	200	http://www.selleckchem.com/products/PLX-4720.html	MAPK
30	S1046	Vandetanib (ZD6474)	K09	K	09	384-L1700-01	475.35	443913-73-3	free base	VEGFR	Vandetanib (ZD6474) is a potent inhibitor of VEGFR2 with IC50 of 40 nM.	C12=C(C(=NC=N1)NC3=C(C=C(C=C3)Br)F)C=C(C(=C2)OCC4CCN(CC4)C)OC	10	http://www.selleckchem.com/products/Vandetanib.html	Protein Tyrosine Kinase
30	S1162	PA-824	K10	K	10	384-L1700-01	359.26	187235-37-6	free base	Others	PA-824 is an anti-tuberculosis drug for tuberculosis with MIC less than 2.8 μM.	O1C2N(C[C@@H](C1)OCC3C=CC(=CC=3)OC(F)(F)F)C=C(N=2)[N+](=O)[O-]	200	http://www.selleckchem.com/products/pa-824.html	Others
38	S1057	Obatoclax Mesylate (GX15-070)	K11	K	11	384-L1700-01	413.49	803712-79-0	mesylate	Bcl-2,Autophagy	Obatoclax (GX15-070) is an antagonist of Bcl-2 with Ki of 0.22 μM, can assist in overcoming MCL-1 mediated resistance to apoptosis. Phase 1/2.	C1(=CC=C2C(=C1)C=C(N2)C3C=C(/C(N=3)=C/C4=C(C=C(N4)C)C)OC).CS(=O)(=O)O	200	http://www.selleckchem.com/products/Obatoclax-Mesylate.html	Apoptosis
38	S1170	WZ3146	K12	K	12	384-L1700-01	464.95	1214265-56-1	free base	EGFR	WZ3146 is a mutant-selective irreversible inhibitor of EGFR(L858R) and EGFR(E746_A750) with IC50 of 2 nM and 2 nM; does not inhibit ERBB2 phosphorylation (T798I).	C1(=CC=C(C=C1)NC2=NC=C(C(=N2)OC3=CC(=CC=C3)NC(C=C)=O)Cl)N4CCN(CC4)C	200	http://www.selleckchem.com/products/WZ3146.html	Protein Tyrosine Kinase
46	S1069	AUY922 (NVP-AUY922)	K13	K	13	384-L1700-01	465.54	747412-49-3	free base	HSP (e.g. HSP90)	AUY922 (NVP-AUY922) is a highly potent HSP90 inhibitor for HSP90α/β with IC50 of 13 nM /21 nM, weaker potency against the HSP90 family members GRP94 and TRAP-1, exhibits the tightest binding of any small-molecule HSP90 ligand. Phase 1/2.	C1(=CC(=C(C=C1C2=C(C(=NO2)C(=O)NCC)C3=CC=C(C=C3)CN4CCOCC4)C(C)C)O)O	199	http://www.selleckchem.com/products/NVP-AUY922.html	Cytoskeletal Signaling
46	S1179	WZ8040	K14	K	14	384-L1700-01	481.01	1214265-57-2	free base	EGFR	WZ8040 is a novel mutant-selective irreversible EGFRT790M inhibitor, does not inhibit ERBB2 phosphorylation (T798I).	C1(=CC=C(C=C1)NC2=NC=C(C(=N2)SC3=CC(=CC=C3)NC(C=C)=O)Cl)N4CCN(CC4)C	199	http://www.selleckchem.com/products/WZ8040.html	Protein Tyrosine Kinase
54	S1080	SU11274	K15	K	15	384-L1700-01	568.09	658084-23-2	free base	c-Met	SU11274 is a selective Met inhibitor with IC50 of 10 nM, no effects on PGDFRβ, EGFR or Tie2.	C1(=CC=CC(=C1)N(C)S(C2=CC3=C(C=C2)NC(C/3=C/C4NC(=C(C=4C)C(N5CCN(CC5)C)=O)C)=O)(=O)=O)Cl	161	http://www.selleckchem.com/products/SU11274.html	Protein Tyrosine Kinase
54	S1190	Bicalutamide	K16	K	16	384-L1700-01	430.37	90357-06-5	free base	Androgen Receptor	Bicalutamide is an androgen receptor (AR) antagonist with IC50 of 0.16 μM.	C(C(CS(=O)(=O)C1C=CC(=CC=1)F)(C)O)(=O)NC2C=C(C(=CC=2)C#N)C(F)(F)F	199	http://www.selleckchem.com/products/Bicalutamide(Casodex).html	Endocrinology & Hormones
62	S1091	OSI-906 (Linsitinib)	K17	K	17	384-L1700-01	421.49	867160-71-2	free base	IGF-1R	OSI-906 (Linsitinib) is a selective inhibitor of IGF-1R with IC50 of 35 nM; modestly potent to InsR with IC50 of 75 nM, and no activity towards Abl, ALK, BTK, EGFR, FGFR1/2, PKA etc. Phase 3.	C1=C(C=C2C(=C1)C=CC(=N2)C3=CC=CC=C3)C4=C5N(C(=N4)[C@H]6C[C@@](C6)(C)O)C=CN=C5N	199	http://www.selleckchem.com/products/OSI-906.html	Protein Tyrosine Kinase
62	S1198	Irinotecan	K18	K	18	384-L1700-01	586.68	97682-44-5	free base	Topoisomerase	Irinotecan is a topoisomerase I inhibitor for LoVo cells and HT-29 cells with IC50 of 15.8 μM and 5.17 μM, respectively.	N1(CCCCC1)C2CCN(CC2)C(=O)OC3=CC4=C(C5=C(N=C(C=C3)4)C6=CC7=C(C(N(C5)6)=O)COC([C@@]7(O)CC)=O)CC	17	http://www.selleckchem.com/products/Irinotecan.html	DNA Damage
70	S1100	MLN8054	K19	K	19	384-L1700-01	476.86	869363-13-3	free base	Aurora Kinase	MLN8054 is a potent and selective inhibitor of Aurora A with IC50 of 4 nM. It is more than 40-fold selective for Aurora A than Aurora B. Phase 1.	C1=C(C=C2C(=C1)C3=C(CN=C2C4=C(C=CC=C4F)F)C=NC(=N3)NC5=CC=C(C=C5)C(=O)O)Cl	199	http://www.selleckchem.com/products/MLN8054.html	Cell Cycle
70	S1207	Tivozanib (AV-951)	K20	K	20	384-L1700-01	454.86	475108-18-0	free base	VEGFR,PDGFR,c-Kit	Tivozanib (AV-951) is a potent and selective VEGFR inhibitor for VEGFR1/2/3 with IC50 of 30 nM/6.5 nM/15 nM, and also inhibits PDGFR and c-Kit, low activity observed against FGFR-1, Flt3, c-Met EGFR and IGF-1R. Phase 3.	C1(=CC=C(C(=C1)Cl)NC(=O)NC2C=C(ON=2)C)OC3=CC=NC4=C3C=C(C(=C4)OC)OC	43	http://www.selleckchem.com/products/AV-951.html	Protein Tyrosine Kinase
78	S1109	BI 2536	K21	K	21	384-L1700-01	521.66	755038-02-9	free base	PLK	BI2536 is a potent Plk1 inhibitor with IC50 of 0.83 nM. It shows 4- and 11-fold greater selectivity against Plk2 and Plk3. Phase 2.	C1(=CC=C(C(=C1)OC)NC2=NC=C3C(=N2)N([C@@H](C(N3C)=O)CC)C4CCCC4)C(NC5CCN(CC5)C)=O	40	http://www.selleckchem.com/products/BI-2536.html	Cell Cycle
78	S1218	Clofarabine	K22	K	22	384-L1700-01	303.68	123318-82-1	free base	DNA/RNA Synthesis	Clofarabine inhibits the enzymatic activities of ribonucleotide reductase (IC50 = 65 nM) and DNA polymerase.	N1=C(N=C2C(=C1N)N=CN2[C@H]3[C@H]([C@@H]([C@H](O3)CO)O)F)Cl	200	http://www.selleckchem.com/products/Clofarabine.html	DNA Damage
6	S1237	Temozolomide	L03	L	03	384-L1700-01	194.15	85622-93-1	free base	Autophagy	Temozolomide is a DNA damage inducer.	N1(N=NC2N(C1=O)C=NC=2C(N)=O)C	200	http://www.selleckchem.com/products/Methazolastone.html	Ubiquitin
6	S1387	Naftopidil DiHCl	L04	L	04	384-L1700-01	465.41	57149-08-3	dihydrochloride	Adrenergic Receptor	Naftopidil DiHCl is a selective 5-HT1A and α1-adrenergic receptor antagonist with IC50 of 0.1 μM and 0.2 μM, respectively. Phase 3.	C1(=C2C(=CC=C1)C=CC=C2)OCC(CN3CCN(CC3)C4=CC=CC=C4OC)O.Cl.Cl	88	http://www.selleckchem.com/products/Naftopidil-Dihydrochloride.html	Neuronal Signaling
14	S1251	Dienogest	L05	L	05	384-L1700-01	311.42	65928-58-7	free base	Estrogen/progestogen Receptor	Dienogest is an orally active synthetic progesterone (or progestin).	C1(CCC2=C3CC[C@]4([C@](CC[C@@]([C@](CCC(=C1)2)3[H])4[H])(O)CC#N)C)=O	199	http://www.selleckchem.com/products/Dienogest.html	Endocrinology & Hormones
14	S1397	Rocuronium Bromide	L06	L	06	384-L1700-01	609.68	119302-91-9	bromide	AChR	Rocuronium Bromide is an aminosteroid non-depolarizing neuromuscular blocker or muscle relaxant.	[C@H]1([C@H](C[C@]2([C@](C1)([C@]3([C@@](CC2)([C@]4([C@](CC3)([C@@H]([C@H](C4)[N+]5(CCCC5)CC=C)OC(=O)C)C)[H])[H])[H])C)[H])O)N6(CCOCC6).[Br-]	200	http://www.selleckchem.com/products/Rocuronium-bromide.html	Neuronal Signaling
22	S1261	Celecoxib	L07	L	07	384-L1700-01	381.37	169590-42-5	free base	COX	Celecoxib is a selective COX-2 inhibitor with IC50 of 40 nM.	C1(=CC=C(C=C1)S(N)(=O)=O)N2C(=CC(=N2)C(F)(F)F)C3=CC=C(C=C3)C	199	http://www.selleckchem.com/products/Celecoxib.html	Neuronal Signaling
22	S1409	Alfuzosin HCl	L08	L	08	384-L1700-01	425.91	81403-68-1	hydrochloride	Adrenergic Receptor	Alfuzosin(Uroxatral) is an alpha1 receptor antagonist used to treat benign prostatic hyperplasia (BPH).	C1(=C(C=C2C(=C1)C(=NC(=N2)N(CCCNC(C3CCCO3)=O)C)N)OC)OC.Cl	199	http://www.selleckchem.com/products/Alfuzosin-hydrochloride.html	Neuronal Signaling
30	S1276	Adapalene	L09	L	09	384-L1700-01	412.52	106685-40-9	free base	Others	Adapalene is a third-generation topical retinoid primarily used in the treatment of acne.	C1(=C(C=CC(=C1)C2=CC3=C(C=C2)C=C(C=C3)C(O)=O)OC)C45CC6CC(C4)CC(C5)C6	19	http://www.selleckchem.com/products/Adapalene.html	Others
30	S1436	Tianeptine sodium	L10	L	10	384-L1700-01	458.93	30123-17-2	sodium	5-HT Receptor	Tianeptine is a selective serotonin reuptake enhancer (SSRE) compound used for treating major depressive episodes.	C12(=C(C(C3C(S(N1C)(=O)=O)=CC(=CC=3)Cl)NCCCCCCC(=O)[O-])C=CC=C2).[Na+]	200	http://www.selleckchem.com/products/Tianeptine-sodium-salt.html	Neuronal Signaling
38	S1286	Budesonide	L11	L	11	384-L1700-01	430.53	51333-22-3	free base	Others	Budesonide is a glucocorticoid steroid for the treatment of asthma, non-infectious rhinitis.	C1C(C=C2[C@](C=1)([C@]3([C@@](CC2)([C@]4([C@](C[C@H]3O)([C@@]5([C@@H](C4)O[C@](O5)(CCC)[H])C(CO)=O)C)[H])[H])[H])C)=O	199	http://www.selleckchem.com/products/Budesonide.html	Others
38	S1445	Zonisamide	L12	L	12	384-L1700-01	212.23	68291-97-4	free base	Others	Zonisamide is a sulfonamide anticonvulsant approved for use as an adjunctive.	C12=CC=CC=C1ON=C2CS(N)(=O)=O	197	http://www.selleckchem.com/products/Zonisamide.html	Others
46	S1299	Floxuridine	L13	L	13	384-L1700-01	246.19	50-91-9	free base	DNA/RNA Synthesis	Floxuridine is a prodrugs of floxuridine and an oncology agent with an GI50 of 5.1 μM for the inhibition of MDCK/PEPT1.	O1[C@@H]([C@H](C[C@H]1N2C=C(C(NC2=O)=O)F)O)CO	199	http://www.selleckchem.com/products/Floxuridine.html	DNA Damage
46	S1457	Atazanavir Sulfate	L14	L	14	384-L1700-01	802.93	229975-97-7	sulfate	HIV Protease	Atazanavir is a HIV protease inhibitor with Ki of 2.66 nM.	O(C(N[C@H](C(N[C@H]([C@H](CN(NC([C@@H](NC(OC)=O)C(C)(C)C)=O)CC1=CC=C(C=C1)C2=NC=CC=C2)O)CC3=CC=CC=C3)=O)C(C)(C)C)=O)C.S(=O)(=O)(O)O	129	http://www.selleckchem.com/products/Atazanavir.html	Proteases
54	S1322	Dexamethasone (DHAP)	L15	L	15	384-L1700-01	392.46	50-02-2	free base	Autophagy,IL Receptor	Dexamethasone is an anti-inflammatory and immunosuppressant.	C1C(C=C2[C@](C=1)([C@]3([C@@](CC2)([C@]4([C@](C[C@H]3O)([C@@]([C@@H](C4)C)(C(=O)CO)O)C)[H])[H])F)C)=O	201	http://www.selleckchem.com/products/Dexamethasone.html	Others
54	S1468	Alfacalcidol	L16	L	16	384-L1700-01	400.64	41294-56-8	free base	Others	Alfacalcidol is a non-selective VDR activator medication.	C1[C@H](C[C@@H](C(C/1=C\C=C2/[C@]3([C@](CCC2)([C@H](CC3)[C@@H](CCCC(C)C)C)C)[H])=C)O)O	199	http://www.selleckchem.com/products/Alfacalcidol.html	Endocrinology & Hormones
62	S1333	Fluoxetine HCl	L17	L	17	384-L1700-01	345.79	56296-78-7	hydrochloride	5-HT Receptor	Fluoxetine HCl is an antidepressant of the selective serotonin reuptake inhibitor (SSRI)class.	C1(=CC=C(C=C1)OC(CCNC)C2=CC=CC=C2)C(F)(F)F.Cl	199	http://www.selleckchem.com/products/Fluoxetine-hydrochloride.html	Neuronal Signaling
62	S1480	VX-222 (VCH-222, Lomibuvir)	L18	L	18	384-L1700-01	445.61	1026785-59-0	free base	HCV Protease	VX-222 (VCH-222) is a novel, potent and selective inhibitor of HCV polymerase with IC50 of 0.94-1.2 μM, 15.3-fold less effective for mutant M423T, and 108-fold less effective for mutant I482L. Phase 2.	[C@H]1(CC[C@@H](CC1)O)N(C2=C(SC(=C2)C#CC(C)(C)C)C(O)=O)C(=O)[C@@H]3CC[C@H](CC3)C	199	http://www.selleckchem.com/products/VX-222.html	Proteases
70	S1353	Ketoconazole	L19	L	19	384-L1700-01	531.43	65277-42-1	free base	P450 (e.g. CYP17)	Ketoconazole inhibits cyclosporine oxidase and testosterone 6 beta-hydroxylase with IC50 of 0.19 mM and 0.22 mM, respectively.	C1(=CC=C(C=C1)OC[C@@H]2O[C@@](OC2)(CN3C=CN=C3)C4=CC=C(C=C4Cl)Cl)N5CCN(CC5)C(=O)C	10	http://www.selleckchem.com/products/Ketoconazole.html	Metabolism
70	S1488	Naratriptan	L20	L	20	384-L1700-01	371.93	143388-64-1	free base	5-HT Receptor	Naratriptan (Amerge) is a triptan agent that is used for the treatment of migraine headaches.	C1(=CC=C2C(=C1)C(=CN2)C3CCN(CC3)C)CCS(=O)(=O)NC.Cl	198	http://www.selleckchem.com/products/Naratriptan(Amerge).html	Neuronal Signaling
78	S1362	Rigosertib (ON-01910)	L21	L	21	384-L1700-01	473.47	1225497-78-8	sodium	PLK	Rigosertib (ON-01910) is a non-ATP-competitive inhibitor of PLK1 with IC50 of 9 nM. It shows 30-fold greater selectivity against Plk2 and no activity to Plk3. Phase 3.	C1(=C(C=C(C=C1OC)OC)OC)/C=C/S(CC2=CC=C(C(=C2)NCC([O-])=O)OC)(=O)=O.[Na+]	200	http://www.selleckchem.com/products/ON-01910.html	Cell Cycle
78	S1504	Dyphylline	L22	L	22	384-L1700-01	254.24	479-18-5	free base	PDE	Dyphylline is a xanthine derivative with bronchodilator and vasodilator effects.	N1(C(N(C2=C(C1=O)N(C=N2)CC(CO)O)C)=O)C	200	http://www.selleckchem.com/products/Dyphylline(Dilor).html	Metabolism
7	S1018	Dovitinib (TKI-258, CHIR-258)	M03	M	03	384-L1700-01	392.43	405169-16-6	citrate	FGFR,FLT3,c-Kit,VEGFR,PDGFR	Dovitinib (TKI258, CHIR258) is a multitargeted RTK inhibitor, mostly for class III (FLT3/c-Kit) with IC50 of 1 nM/2 nM, also potent to class IV (FGFR1/3) and class V (VEGFR1-4) RTKs with IC50 of 8-13 nM, less potent to InsR, EGFR, c-Met, EphA2, Tie2, IGF-1R and HER2. Phase 4.	C1=CC=C(C2=C1NC(C(=C2N)C3NC4=C(N=3)C=CC(=C4)N5CCN(CC5)C)=O)F	76	http://www.selleckchem.com/products/CHIR-258.html	Angiogenesis
7	S1132	INO-1001	M04	M	04	384-L1700-01	136.15	3544-24-9	free base	PARP	INO-1001 is a potent inhibitor of PARP with IC50 of <50 nM in CHO cells and a mediator of oxidant-induced myocyte dysfunction during reperfusion. Phase 2.	C1=CC=C(C=C1C(=O)N)N	198	http://www.selleckchem.com/products/INO-1001.html	DNA Damage
15	S1029	Lenalidomide (CC-5013)	M05	M	05	384-L1700-01	259.26	191732-72-6	free base	TNF-alpha	Lenalidomide (CC-5013) is a TNF-α secretion inhibitor with IC50 of 13 nM.	C1=CC(=C2C(=C1)C(N(C2)C3C(NC(CC3)=O)=O)=O)N	200	http://www.selleckchem.com/products/Lenalidomide.html	Apoptosis
15	S1142	17-DMAG (Alvespimycin) HCl	M06	M	06	384-L1700-01	653.21	467214-21-7	hydrochloride	HSP (e.g. HSP90)	17-DMAG is a potent, water-soluble HSP90 inhibitor with IC50 of 62 nM.	C1(=C2C(C(=CC1=O)NC(C(=C\C=C/[C@@H]([C@H](/C(=C/[C@@H]([C@H]([C@H](C[C@@H](C2)C)OC)O)C)C)OC(=O)N)OC)/C)=O)=O)NCCN(C)C.Cl	200	http://www.selleckchem.com/products/17-DMAG,Hydrochloride-Salt.html	Cytoskeletal Signaling
23	S1039	Rapamycin (Sirolimus)	M07	M	07	384-L1700-01	914.18	53123-88-9	free base	Autophagy,mTOR	Rapamycin (Sirolimus, AY-22989, WY-090217) is a specific mTOR inhibitor with IC50 of ~0.1 nM.	[C@@H]1([C@@H](C[C@@H](CC1)C[C@H]([C@@H]2CC([C@@H](/C=C(\C)[C@H]([C@@H](C([C@@H](C[C@@H](/C=C/C=C/C=C(/[C@H](C[C@@H]3CC[C@H]([C@](C(C(N4CCCC[C@@H](C(O2)=O)4)=O)=O)(O3)O)C)OC)C)C)C)=O)OC)O)C)=O)C)OC)O	21	http://www.selleckchem.com/products/Rapamycin.html	PI3K/Akt/mTOR
23	S1153	Roscovitine (Seliciclib,CYC202)	M08	M	08	384-L1700-01	354.45	186692-46-6	free base	CDK	Roscovitine (Seliciclib, CYC202) is a potent and selective CDK inhibitor for Cdc2, CDK2 and CDK5 with IC50 of 0.65 μM, 0.7 μM and 0.16 μM. It shows little effect on CDK4/6. Phase 2.	N1=C2C(=C(N=C1N[C@@H](CO)CC)NCC3=CC=CC=C3)N=CN2C(C)C	200	http://www.selleckchem.com/products/Roscovitine.html	Cell Cycle
31	S1047	Vorinostat (SAHA, MK0683)	M09	M	09	384-L1700-01	264.3	149647-78-9	free base	Autophagy,HDAC	Vorinostat (suberoylanilide hydroxamic acid, SAHA) is an HDAC inhibitor with IC50 of ~10 nM.	C1=CC=CC(=C1)NC(=O)CCCCCCC(NO)=O	200	http://www.selleckchem.com/products/Vorinostat-(SAHA).html	Epigenetics
31	S1163	AT13387	M10	M	10	384-L1700-01	409.52	912999-49-6	free base	HSP (e.g. HSP90)	AT13387 is a selective potent Hsp90 inhibitor with IC50 of 18 nM in A375 cells, displays a long duration of anti-tumor activity.	C(=O)(N1CC2C=CC(=CC(C1)=2)CN3CCN(CC3)C)C4C(=CC(=C(C=4)C(C)C)O)O	61	http://www.selleckchem.com/products/at13387.html	Cytoskeletal Signaling
39	S1060	Olaparib (AZD2281, Ku-0059436)	M11	M	11	384-L1700-01	434.46	763113-22-0	free base	PARP	Olaparib (AZD2281, KU0059436) is a selective inhibitor of PARP1/2 with IC50 of 5 nM/1 nM, 300-times less effective against tankyrase-1. Phase 1/2.	C1=CC=CC2=C1C(=NNC2=O)CC3=CC(=C(C=C3)F)C(N4CCN(CC4)C(=O)C5CC5)=O	200	http://www.selleckchem.com/products/AZD2281(Olaparib).html	DNA Damage
39	S1171	CYC116	M12	M	12	384-L1700-01	368.46	693228-63-6	free base	Aurora Kinase,VEGFR	CYC116 is a potent inhibitor of Aurora A/B with Ki of 8.0 nM/9.2 nM, is less potent to VEGFR2 (Ki of 44 nM), with 50-fold greater potency than CDKs, not active against PKA, Akt/PKB, PKC, no effect on GSK-3α/β, CK2, Plk1 and SAPK2A. Phase 1.	C1(=NC=CC(=N1)C2SC(=NC=2C)N)NC3=CC=C(C=C3)N4CCOCC4	65	http://www.selleckchem.com/products/CYC116.html	Cell Cycle
47	S1070	PHA-665752	M13	M	13	384-L1700-01	641.61	477575-56-7	free base	c-Met	PHA-665752 is a potent, selective and ATP-competitive c-Met inhibitor with IC50 of 9 nM, >50-fold selectivity for c-Met than RTKs or STKs.	C1=CC=C(C(=C1Cl)CS(C2=CC3=C(C=C2)NC(C/3=C/C4=C(C(=C(N4)C)C(N5[C@H](CCC5)CN6CCCC6)=O)C)=O)(=O)=O)Cl	199	http://www.selleckchem.com/products/PHA-665752.html	Protein Tyrosine Kinase
47	S1180	XAV-939	M14	M	14	384-L1700-01	312.31	284028-89-3	free base	Wnt/beta-catenin	XAV-939 selectively inhibits Wnt/β-catenin-mediated transcription through tankyrase1/2 inhibition with IC50 of 11 nM/4 nM, regulates axin levels and does not affect CRE, NF-κB or TGF-β.	C1=CC(=CC=C1C(F)(F)F)C2=NC(=C3C(=N2)CCSC3)O	38	http://www.selleckchem.com/products/XAV-939.html	Stem Cells & Wnt
55	S1082	Vismodegib (GDC-0449)	M15	M	15	384-L1700-01	421.3	879085-55-9	free base	Hedgehog/Smoothened	Vismodegib (GDC-0449) is a potent, novel and specific hedgehog inhibitor with IC50 of 3 nM and also inhibits P-gp with IC50 of 3.0 μM.	C1(=C(C=C(C=C1)NC(C2=CC=C(C=C2Cl)S(C)(=O)=O)=O)C3=NC=CC=C3)Cl	199	http://www.selleckchem.com/products/GDC-0449.html	Stem Cells & Wnt
55	S1191	Fulvestrant	M16	M	16	384-L1700-01	606.77	129453-61-8	free base	Estrogen/progestogen Receptor	Fulvestrant is an estrogen receptor (ER) antagonist with IC50 of 0.094 nM.	C1(C=CC2[C@@]3(CC[C@]4([C@H](CC[C@@]([C@]([C@@H](CC(C=1)=2)CCCCCCCCCS(=O)CCCC(C(F)(F)F)(F)F)3[H])4[H])O)C)[H])O	164	http://www.selleckchem.com/products/Fulvestrant.html	Endocrinology & Hormones
63	S1092	KU-55933 (ATM Kinase Inhibitor)	M17	M	17	384-L1700-01	395.49	587871-26-9	free base	ATM/ATR	KU-55933 is a potent and specific ATM inhibitor with IC50/Ki of 12.9 nM/2.2 nM, and is highly selective for ATM as compared to DNA-PK, PI3K/PI4K, ATR and mTOR.	C1=CC=C2C(=C1)SC3=C(S2)C=CC=C3C4=CC(C=C(O4)N5CCOCC5)=O	83	http://www.selleckchem.com/products/KU-55933.html	DNA Damage
63	S1199	Cladribine	M18	M	18	384-L1700-01	285.69	4291-63-8	free base	DNA/RNA Synthesis	Cladribine is an adenosine deaminase inhibitor for U266, RPMI8226, and MM1.S cells with IC50 of approximately 2.43 μM, 0.75 μM, and 0.18 μM, respectively.	N1=C(C2=C(N=C1Cl)N(C=N2)[C@H]3C[C@@H]([C@H](O3)CO)O)N	199	http://www.selleckchem.com/products/Cladribine.html	DNA Damage
71	S1101	Vatalanib (PTK787) 2HCl	M19	M	19	384-L1700-01	419.73	212141-51-0	dihydrochloride	c-Kit,VEGFR	Vatalanib (PTK787) is an inhibitor of VEGFR2/KDR with IC50 of 37 nM, less potent against VEGFR1/Flt-1, 18-fold against VEGFR3/Flt-4. Phase 1/2.	C1(=CC=C2C(=C1)C(=NN=C2CC3=CC=NC=C3)NC4=CC=C(C=C4)Cl).Cl.Cl	202	http://www.selleckchem.com/products/Vatalanib,Dihydrochloride-Salt.html	Protein Tyrosine Kinase
71	S1208	Doxorubicin (Adriamycin)	M20	M	20	384-L1700-01	579.98	25316-40-9	hydrochloride	Autophagy,Topoisomerase	Doxorubicin (Adriamycin) is an antibiotic agent that inhibits DNA topoisomerase II and induces DNA damage and apoptosis.	C1(=CC=C2C(=C1OC)C(C3=C(C2=O)C(=C4C(=C3O)[C@@H](C[C@@](C4)(C(CO)=O)O)O[C@]5(C[C@@H]([C@@H]([C@@H](O5)C)O)N)[H])O)=O).Cl	172	http://www.selleckchem.com/products/Adriamycin.html	DNA Damage
79	S1110	Varespladib (LY315920)	M21	M	21	384-L1700-01	380.39	172732-68-2	free base	Phospholipase (e.g. PLA)	LY315920 (Varespladib) is a potent and selective human non-pancreatic secretory phospholipase A2 (hnsPLA) inhibitor with IC50 of 7 nM,. Phase 3.	C1(N(C2=C(C=1C(C(N)=O)=O)C(=CC=C2)OCC(=O)O)CC3=CC=CC=C3)CC	199	http://www.selleckchem.com/products/LY315920(Varespladib).html	Metabolism
79	S1219	YM201636	M22	M	22	384-L1700-01	467.48	371942-69-7	free base	PI3K	YM201636 is a selective PIKfyve inhibitor with IC50 of 33 nM, less potent to p110α and insensitive to Fabl (yeast orthologue).	C1C(=CC=C(N=1)N)C(=O)NC2C=C(C=CC=2)C3N=C4C(=C(N=3)N5CCOCC5)OC6C(=CC=CN=6)4	74	http://www.selleckchem.com/products/ym201636.html	PI3K/Akt/mTOR
7	S1241	Vincristine	N03	N	03	384-L1700-01	923.04	2068-78-2	sulfate	Microtubule Associated,Autophagy	Vincristine is an inhibitor of polymerization of microtubules by binding to tubulin with IC50 of 32 μM.	C1(=CC2=C(C=C1[C@@]3(C4=C(C5=C(N4)C=CC=C5)CCN6C[C@](C3)(C[C@@](C6)(O)CC)[H])C(OC)=O)[C@]78[C@@](N2C=O)([C@]([C@@H]([C@]9([C@@]7(N(CC8)CC=C9)[H])CC)OC(=O)C)(C(OC)=O)O)[H])OC.S(=O)(=O)(O)O	108	http://www.selleckchem.com/products/Vincristine-Sulfate.html	Cytoskeletal Signaling
7	S1389	Omeprazole	N04	N	04	384-L1700-01	345.42	73590-58-6	free base	Autophagy,Proton Pump	Omeprazole(Prilosec) is a proton pump inhibitor used in the treatment of dyspepsia.	C1=C(C=C2C(=C1)NC(=N2)S(=O)CC3=C(C(=C(C=N3)C)OC)C)OC	199	http://www.selleckchem.com/products/Omeprazole.html	Transmembrane Transporters
15	S1252	Entecavir Hydrate	N05	N	05	384-L1700-01	295.29	209216-23-9	hydrate	Others	Entecavir hydrate belongs to the family of medicines called antivirals.	N1(=C(NC2=C(C1=O)N=CN2[C@H]3C[C@@H]([C@H](C3=C)CO)O)N).O	199	http://www.selleckchem.com/products/Entecavir.html	Others
15	S1398	Stavudine (d4T)	N06	N	06	384-L1700-01	224.21	3056-17-5	free base	Reverse Transcriptase	Stavudine is a nucleoside analog reverse transcriptase inhibitor (NARTI) active against HIV.	O1C(C=CC1CO)N2C(NC(C(=C2)C)=O)=O	200	http://www.selleckchem.com/products/Stavudine.html	Microbiology
23	S1262	Avagacestat (BMS-708163)	N07	N	07	384-L1700-01	520.88	1146699-66-2	free base	Gamma-secretase,Beta Amyloid	Avagacestat (BMS-708163) is a potent, selective, orally bioavailable γ-secretase inhibitor of Aβ40 and Aβ42 with IC50 of 0.3 nM and 0.27 nM, demonstrating a 193-fold selectivity against Notch. Phase 2.	C1(=C(C=C(C=C1)C2N=CON=2)F)CN([C@@H](C(N)=O)CCC(F)(F)F)S(C3=CC=C(C=C3)Cl)(=O)=O	199	http://www.selleckchem.com/products/BMS-708163.html	Proteases
23	S1415	Clopidogrel	N08	N	08	384-L1700-01	419.9	120202-66-6	sulfate	P2 Receptor	Clopidogrel (Plavix) is an oral, thienopyridine class antiplatelet agent.	C1(=CC=CC(=C1Cl)[C@H](N2CCC3=C(C2)C=CS3)C(=O)OC).OS(O)(=O)=O	200	http://www.selleckchem.com/products/Clopidogrel-bisulfate.html	Neuronal Signaling
31	S1278	Altretamine	N09	N	09	384-L1700-01	210.28	645-05-6	free base	Others	Altretamine is an anti-neoplastic agent.	N1=C(N=C(N=C1N(C)C)N(C)C)N(C)C	71	http://www.selleckchem.com/products/Altretamine.html	Others
31	S1437	Tizanidine HCl	N10	N	10	384-L1700-01	290.17	64461-82-1	hydrochloride	Adrenergic Receptor	Tizanidine HCl is an α2-adrenergic receptor agonist and inhibits neurotransmitter release from CNS noradrenergic neurons.	C1(C=CC2C(C=1NC3NCCN=3)=NSN=2)Cl.Cl	34	http://www.selleckchem.com/products/Tizanidine-hydrochloride.html	Neuronal Signaling
39	S1287	Bumetanide	N11	N	11	384-L1700-01	364.42	28395-03-1	free base	Others	Bumetanide (Bumex) is a loop diuretic of the sulfamyl category to treat heart failure.	C1=C(C(=C(C=C1C(=O)O)NCCCC)OC2=CC=CC=C2)S(=O)(=O)N	200	http://www.selleckchem.com/products/Bumetanide.html	Others
39	S1450	Nanchangmycin	N12	N	12	384-L1700-01	889.1	65101-87-3	free base	Others	Nanchangmycin (dianemycin) is a polyether antibiotic with similar structure to dianemycin and is very active against a broad spectrum of harmful nematodes and insects but not for for mammals and plants.	[O-]C([C@H](C[C@@H](C)C(/C(=C/[C@@H]([C@]1(O[C@]2(C[C@@H]([C@@H]1C)O)CC[C@](O2)([C@@]3(O[C@]4([C@@H]([C@H](C3)OC5O[C@@H]([C@H](CC5)OC)C)C)[C@H](C[C@@](O4)([C@]6(O[C@]([C@@H](C[C@H]6C)C)(CO)O)[H])[H])C)[H])C)[H])C)C)=O)C)=O.[Na+]	194	http://www.selleckchem.com/products/Nanchangmycin.html	Others
47	S1300	FT-207 (NSC 148958)	N13	N	13	384-L1700-01	200.17	17902-23-7	free base	DNA/RNA Synthesis	FT-207 (NSC 148958) is a substance being used in the treatment of some types of cancer.	N1C(N(C=C(C1=O)F)[C@@H]2OCCC2)=O	199	http://www.selleckchem.com/products/Ftorafur.html	DNA Damage
47	S1458	VX-745	N14	N	14	384-L1700-01	436.26	209410-46-8	free base	p38 MAPK	VX-745 is a potent and selective inhibitor of p38α with IC50 of 10 nM, 22-fold greater selectivity versus p38β and no inhibition to p38γ.	C1=C(C=CC(=C1F)SC2C=CC3N(N=2)C=NC(C=3C4=C(C=CC=C4Cl)Cl)=O)F	34	http://www.selleckchem.com/products/VX-745.html	MAPK
55	S1324	Doxazosin Mesylate	N15	N	15	384-L1700-01	547.58	77883-43-3	mesylate	Adrenergic Receptor	Doxazosin mesylate is an alpha-1 adrenergic receptor blocker.	C12(=CC(=C(C=C1C(=NC(=N2)N3CCN(CC3)C(C4COC5=C(O4)C=CC=C5)=O)N)OC)OC).S(=O)(O)(=O)C	27	http://www.selleckchem.com/products/Doxazosin-mesylate.html	Neuronal Signaling
55	S1469	Calcifediol	N16	N	16	384-L1700-01	400.64	19356-17-3	free base	Others	Calcifediol is a major circulating metabolite of vitamin D3 and acts as a competitive inhibitor with an apparent Ki of 3.9 μM. It also suppresses PTH secretion and mRNA (ED50=2 nM)	C1[C@H](CCC(C/1=C/C=C2/[C@]3([C@](CCC2)([C@]([C@@H](CCCC(C)(C)O)C)(CC3)[H])C)[H])=C)O	199	http://www.selleckchem.com/products/Calcifediol.html	Others
63	S1334	Flupirtine maleate	N17	N	17	384-L1700-01	420.39	75507-68-5	maleate	DNA/RNA Synthesis	Flupirtine maleate is the salt form of Flupirtine, which is a centrally acting non-opioid analgesia, is a selective neuronal potassium channel opener that also has NMDA receptor antagonist properties. Phase 2.	C1(=CC=C(C=C1)CNC2=NC(=C(C=C2)NC(=O)OCC)N)F.OC(/C=C/C(O)=O)=O	199	http://www.selleckchem.com/products/Flupirtine-maleate.html	DNA Damage
63	S1481	Zosuquidar (LY335979) 3HCl	N18	N	18	384-L1700-01	636.99	167465-36-3	hydrochloride	P-gp	Zosuquidar (LY335979) is a potent modulator of P-glycoprotein-mediated multi-drug resistance with Ki of 60 nM. Phase 3.	C12(=C(C=CC=C1OC[C@@H](CN3CCN(CC3)[C@@H]4C5=C([C@@H]6[C@H](C7=C4C=CC=C7)C(F)(F)6)C=CC=C5)O)N=CC=C2).Cl.Cl.Cl	156	http://www.selleckchem.com/products/LY335979.html	Transmembrane Transporters
71	S1354	Lansoprazole	N19	N	19	384-L1700-01	369.36	103577-45-3	free base	Proton Pump	Lansoprazole is a proton-pump inhibitor (PPI) which prevents the stomach from producing gastric acid.	C1=CC=C2C(=C1)N=C(N2)S(CC3=NC=CC(=C3C)OCC(F)(F)F)=O	200	http://www.selleckchem.com/products/Lansoprazole.html	Transmembrane Transporters
71	S1489	PIK-93	N20	N	20	384-L1700-01	389.88	593960-11-3	free base	PI3K	PIK-93 is the first potent, synthetic PI4K (PI4KIIIβ) inhibitor with IC50 of 19 nM; shown to inhibit PI3Kα with IC50 of 39 nM.	C1(=C(C=C(C=C1)C2SC(=NC=2C)NC(C)=O)S(=O)(=O)NCCO)Cl	200	http://www.selleckchem.com/products/PIK-93.html	PI3K/Akt/mTOR
79	S1363	Ki8751	N21	N	21	384-L1700-01	469.41	228559-41-9	free base	PDGFR,c-Kit,VEGFR	Ki8751 is a potent and selective inhibitor of VEGFR2 with IC50 of 0.9 nM, >40-fold selective for VEGFR2 than c-Kit, PDGFRα and FGFR-2, little activity to EGFR, HGFR and InsR.	C1=CN=C2C(=C1OC3=CC=C(C(=C3)F)NC(NC4=CC=C(C=C4F)F)=O)C=C(C(=C2)OC)OC	100	http://www.selleckchem.com/products/Ki8751.html	Protein Tyrosine Kinase
79	S1505	Aztreonam	N22	N	22	384-L1700-01	435.43	78110-38-0	free base	Others	Aztreonam is a synthetic monocyclic beta-lactam antibiotic.	[C@H]1(C(N([C@@H]1C)S(O)(=O)=O)=O)NC(\C(=N/OC(C(O)=O)(C)C)C2N=C(SC=2)N)=O	199	http://www.selleckchem.com/products/Aztreonam(Azactam).html	Others
8	S1020	PD184352 (CI-1040)	O03	O	03	384-L1700-01	478.67	212631-79-3	free base	MEK	CI-1040 (PD 184352) is an ATP non-competitive MEK1/2 inhibitor with IC50 of 17 nM, 100-fold more selective for MEK1/2 than MEK5. Phase 2.	C1=C(C(=C(C(=C1)C(NOCC2CC2)=O)NC3=CC=C(C=C3Cl)I)F)F	200	http://www.selleckchem.com/products/CI-1040-(PD184352).html	MAPK
8	S1133	Alisertib (MLN8237)	O04	O	04	384-L1700-01	518.92	1028486-01-2	free base	Aurora Kinase	Alisertib (MLN8237) is a selective Aurora A inhibitor with IC50 of 1.2 nM. It has >200-fold higher selectivity for Aurora A than Aurora B. Phase 3.	C1=CC=C(C(=C1OC)C2=NCC3=C(C4=C2C=C(C=C4)Cl)N=C(N=C3)NC5=CC(=C(C=C5)C(O)=O)OC)F	52	http://www.selleckchem.com/products/MLN8237.html	Cell Cycle
16	S1030	Panobinostat (LBH589)	O05	O	05	384-L1700-01	349.43	404950-80-7	free base	HDAC	Panobinostat (LBH589) is a novel broad-spectrum HDAC inhibitor with IC50 of 5 nM. Phase 3.	C1(=CC=C(C=C1)/C=C/C(=O)NO)CNCCC2=C(NC3=C2C=CC=C3)C	200	http://www.selleckchem.com/products/LBH-589.html	Epigenetics
16	S1143	AG-490 (Tyrphostin B42)	O06	O	06	384-L1700-01	294.3	133550-30-8	free base	JAK,EGFR	AG-490 (Tyrphostin B42) is an inhibitor of EGFR with IC50 of 0.1 μM, 135-fold more selective for EGFR versus ErbB2, also inhibits JAK2 with no activity to Lck, Lyn, Btk, Syk and Src.	C1(=C(C=CC(=C1)/C=C(/C(NCC2=CC=CC=C2)=O)C#N)O)O	200	http://www.selleckchem.com/products/AG-490.html	Protein Tyrosine Kinase
24	S1040	Sorafenib Tosylate	O07	O	07	384-L1700-01	637.03	475207-59-1	tosylate	PDGFR,Raf,VEGFR	Sorafenib Tosylate (Bay 43-9006) is a multikinase inhibitor of Raf-1, B-Raf and VEGFR-2 with IC50 of 6 nM, 22 nM and 90 nM, respectively.	C1(=CC=C(C=C1C(F)(F)F)NC(NC2=CC=C(C=C2)OC3=CC=NC(=C3)C(NC)=O)=O)Cl.C4=CC(=CC=C4S(O)(=O)=O)C	199	http://www.selleckchem.com/products/Sorafenib-Tosylate.html	MAPK
24	S1154	SNS-314 Mesylate	O08	O	08	384-L1700-01	527.04	1146618-41-8	mesylate	Aurora Kinase	SNS-314 Mesylate is a potent and selective inhibitor of Aurora A, Aurora B and Aurora C with IC50 of 9 nM, 31 nM, and 3 nM, respectively. It is less potent to Trk A/B, Flt4, Fms, Axl, c-Raf and DDR2. Phase 1.	C12(=C(N=CN=C1NCCC3SC(=NC=3)NC(NC4=CC(=CC=C4)Cl)=O)C=CS2).CS(=O)(=O)O	199	http://www.selleckchem.com/products/SNS-314.html	Cell Cycle
32	S1048	VX-680 (Tozasertib, MK-0457)	O09	O	09	384-L1700-01	464.59	639089-54-6	free base	Aurora Kinase	VX-680 (Tozasertib, MK-0457) is a pan-Aurora inhibitor, mostly against Aurora A with Kiapp of 0.6 nM, less potent towards Aurora B/Aurora C and 100-fold more selective for Aurora A than 55 other kinases. Phase 2.	C1(=CC(=NC(=N1)SC2=CC=C(C=C2)NC(=O)C3CC3)N4CCN(CC4)C)NC5C=C(NN=5)C	200	http://www.selleckchem.com/products/VX-680(MK-0457).html	Cell Cycle
32	S1164	Lenvatinib (E7080)	O10	O	10	384-L1700-01	426.85	417716-92-8	free base	VEGFR	E7080 (Lenvatinib) is a multi-target inhibitor, mostly for VEGFR2(KDR)/VEGFR3(Flt-4) with IC50 of 4 nM/5.2 nM, less potent against VEGFR1/Flt-1, ~10-fold more selective for VEGFR2/3 against FGFR1, PDGFRα/β. Phase 3.	C1(=C(C=C2C(=C1)C(=CC=N2)OC3=CC(=C(C=C3)NC(=O)NC4CC4)Cl)OC)C(N)=O	93	http://www.selleckchem.com/products/E7080.html	Protein Tyrosine Kinase
40	S1061	Nutlin-3	O11	O	11	384-L1700-01	581.5	890090-75-2	free base	E3 Ligase ,Mdm2	Nutlin-3 is a potent and selective Mdm2 (RING finger-dependent ubiquitin protein ligase for itself and p53) antagonist with IC50 of 90 nM; stabilizes p73 in p53-deficient cells.	N1(C(C(N=C1C2=C(C=C(C=C2)OC)OC(C)C)C3=CC=C(C=C3)Cl)C4=CC=C(C=C4)Cl)C(=O)N5CCNC(C5)=O	171	http://www.selleckchem.com/products/Nutlin-3.html	Apoptosis
40	S1172	JNJ-26854165 (Serdemetan)	O12	O	12	384-L1700-01	328.41	881202-45-5	free base	p53,E3 Ligase	JNJ-26854165 acts as a HDM2 ubiquitin ligase antagonist and also induces early apoptosis in p53 wild-type cells, inhibits cellular proliferation followed by delayed apoptosis in the absence of functional p53. Phase 1.	C1=C2C(=CC=C1)NC=C2CCNC3=CC=C(C=C3)NC4=CC=NC=C4	200	http://www.selleckchem.com/products/JNJ-26854165.html	Apoptosis
48	S1071	HA14-1	O13	O	13	384-L1700-01	409.23	65673-63-4	free base	Bcl-2	HA14-1 is a non-peptidic ligand of a Bcl-2 surface pocket with IC50 of ~9 μM.	C1=C(C=C2C(=C1)OC(=C([C@@]2([C@H](C#N)C(OCC)=O)[H])C(OCC)=O)N)Br	200	http://www.selleckchem.com/products/HA14-1.html	Apoptosis
48	S1181	ENMD-2076	O14	O	14	384-L1700-01	375.47	934353-76-1	tartaric acid	Aurora Kinase,FLT3,VEGFR	ENMD-2076 has selective activity against Aurora A and Flt3 with IC50 of 14 nM and 1.86 nM, 25-fold selective for Aurora A than over Aurora B and less potent to VEGFR2/KDR and VEGFR3, FGFR1 and FGFR2 and PDGFRα. Phase 2.	C1(N=C(C=C(N=1)N2CCN(CC2)C)NC3=NNC(=C3)C)/C=C/C4C=CC=CC=4	279	http://www.selleckchem.com/products/ENMD-2076.html	Angiogenesis
56	S1084	Brivanib (BMS-540215)	O15	O	15	384-L1700-01	370.38	649735-46-6	free base	FGFR,VEGFR	Brivanib is an ATP-competitive inhibitor against VEGFR2 with IC50 of 25 nM, moderate potency against VEGFR-1 and FGFR-1, but >240-fold against PDGFR-β. Phase 3.	C12=C(C(=C(C=C1)OC3=NC=NN4C3=C(C(=C4)OC[C@@H](C)O)C)F)C=C(N2)C	199	http://www.selleckchem.com/products/Brivanib.html	Protein Tyrosine Kinase
56	S1192	Raltitrexed	O16	O	16	384-L1700-01	458.49	112887-68-0	free base	DNA/RNA Synthesis	Raltitrexed is a thymidylate synthase inhibitor with an IC50 of 9 nM for the inhibition of L1210 cell growth.	C([C@H](CCC(=O)O)NC(=O)C1=CC=C(S1)N(CC2=CC3C(NC(=NC(C=C2)=3)C)=O)C)(=O)O	200	http://www.selleckchem.com/products/Raltitrexed.html	DNA Damage
64	S1093	GSK1904529A	O17	O	17	384-L1700-01	851.96	1089283-49-7	free base	IGF-1R	GSK1904529A is a selective inhibitor of IGF-1R and IR with IC50 of 27 nM and 25 nM, >100-fold more selective for IGF-1R/InsR than Akt1/2, Aurora A/B,B-Raf, CDK2, EGFR etc.	C1=C(C(=C(C=C1)F)NC(C2=C(C=CC(=C2)C3=C(N4C(=N3)C=CC=C4)C5=CC=NC(=N5)NC6=C(C=C(C(=C6)CC)N7CCC(CC7)N8CCN(CC8)S(C)(=O)=O)OC)OC)=O)F	145	http://www.selleckchem.com/products/GSK1904529A.html	Protein Tyrosine Kinase
64	S1200	Decitabine	O18	O	18	384-L1700-01	228.21	2353-33-5	free base	DNA Methyltransferase	Decitabine is a potent inhibitor of DNA methylation with IC50 of 438 nM and 4.38 nM in HL-60 and KG1a cells, respectively.	[C@H]1(O[C@@H]([C@H](C1)O)CO)N2C=NC(=NC2=O)N	201	http://www.selleckchem.com/products/Decitabine.html	Epigenetics
72	S1102	U0126-EtOH	O19	O	19	384-L1700-01	426.56	1173097-76-1	ethanolat	MEK	U0126-EtOH is a highly selective inhibitor of MEK1/2 with IC50 of 0.07 μM/0.06 μM, 100-fold higher affinity for ΔN3-S218E/S222D MEK than PD098059.	C1(=CC=C(C(=C1)SC(/N)=C(\C(=C(\SC2=C(C=CC=C2)N)N)C#N)C#N)N).CCO	199	http://www.selleckchem.com/products/U0126.html	MAPK
72	S1209	Fluorouracil (5-Fluoracil, 5-FU)	O20	O	20	384-L1700-01	130.08	51-21-8	free base	DNA/RNA Synthesis	Fluorouracil (5-Fluoracil, 5-FU) is an DNA/RNA synthesis inhibitor, which interrupts nucleotide synthetic by inhibiting thymidylate synthase (TS).	C1(NC(C(=CN1)F)=O)=O	199	http://www.selleckchem.com/products/Adrucil(Fluorouracil).html	DNA Damage
80	S1111	Foretinib (GSK1363089)	O21	O	21	384-L1700-01	632.65	849217-64-7	free base	VEGFR,c-Met	Foretinib (GSK1363089) is an ATP-competitive inhibitor of HGFR and VEGFR, mostly for Met and KDR with IC50 of 0.4 nM and 0.9 nM. Less potent against Ron, Flt-1/3/4, Kit, PDGFRα/β and Tie-2, and little activity to FGFR1 and EGFR. Phase 2.	C1(=CC=C(C=C1)F)NC(C2(C(NC3=CC(=C(C=C3)OC4C5=C(N=CC=4)C=C(C(=C5)OC)OCCCN6CCOCC6)F)=O)CC2)=O	200	http://www.selleckchem.com/products/XL880(GSK1363089,EXEL-2880).html	Protein Tyrosine Kinase
80	S1220	OSI-930	O22	O	22	384-L1700-01	443.44	728033-96-3	free base	c-Kit,CSF-1R,VEGFR	OSI-930 is a potent inhibitor of Kit, KDR and CSF-1R with IC50 of 80 nM, 9 nM and 15 nM, respectively; also potent to Flt-1, c-Raf and Lck and low activity against PDGFRα/β, Flt-3 and Abl. Phase 1.	C1=CC=C2C(=C1)C(=CC=N2)CNC3=C(SC=C3)C(NC4=CC=C(C=C4)OC(F)(F)F)=O	200	http://www.selleckchem.com/products/OSI-930.html	Protein Tyrosine Kinase
8	S1243	Agomelatine	P03	P	03	384-L1700-01	243.3	138112-76-2	free base	5-HT Receptor	Agomelatine is classified as a norepinephrine-dopamine disinhibitor (NDDI) due to its antagonism of the 5-HT2C receptor.	C(C)(=O)NCCC1C=CC=C2C=CC(=CC=12)OC	201	http://www.selleckchem.com/products/Agomelatine.html	Neuronal Signaling
8	S1390	Ondansetron HCl	P04	P	04	384-L1700-01	329.82	99614-01-4	hydrochloride	5-HT Receptor	Ondansetron HCl is a serotonin 5-HT3 receptor antagonist.	C1(=CC=C2C(=C1)C3=C(N2C)CCC(C3=O)CN4C(=NC=C4)C).Cl	200	http://www.selleckchem.com/products/Ondansetron-hydrochloride.html	Neuronal Signaling
16	S1255	Nepafenac	P05	P	05	384-L1700-01	254.28	78281-72-8	free base	Others	Nepafenac is a non-steroidal anti-inflammatory agent.	C(CC1C(=C(C=CC=1)C(C2C=CC=CC=2)=O)N)(=O)N	200	http://www.selleckchem.com/products/Nepafenac.html	Others
16	S1400	Tenofovir Disoproxil Fumarate	P06	P	06	384-L1700-01	635.51	202138-50-9	fumarate	Reverse Transcriptase	Tenofovir disoproxil fumarate belongs to nucleotide analogue reverse transcriptase inhibitors (nRTIs).	N1(C=NC2=C(C=1N)N=CN2C[C@H](OCP(OCOC(OC(C)C)=O)(OCOC(=O)OC(C)C)=O)C).C(=C/C(=O)O)/C(=O)O	201	http://www.selleckchem.com/products/Tenofovir-Disoproxil-Fumarate.html	Microbiology
24	S1264	PD173074	P07	P	07	384-L1700-01	523.67	219580-11-7	free base	VEGFR,FGFR	PD173074 is a potent FGFR1 inhibitor with IC50 of ~25 nM and also inhibits VEGFR2 with IC50 of 100-200 nM, ~1000-fold selective for FGFR1 than PDGFR and c-Src.	N1=C(N=C2C(=C1)C=C(C(=N2)NC(NC(C)(C)C)=O)C3=CC(=CC(=C3)OC)OC)NCCCCN(CC)CC	190	http://www.selleckchem.com/products/PD-173074.html	Angiogenesis
24	S1422	Droxinostat	P08	P	08	384-L1700-01	243.69	99873-43-5	free base	HDAC	Droxinostat (CMH, 5809354) is a selective inhibitor of HDAC, mostly for HDACs 6 and 8 with IC50 of 2.47μM and 1.46 μM, greater than 8-fold selective against HDAC3 and no inhibition to HDAC1, 2, 4, 5, 7, 9, and 10.	C1=C(C=C(C(=C1)OCCCC(NO)=O)C)Cl	201	http://www.selleckchem.com/products/Droxinostat.html	Cytoskeletal Signaling
32	S1280	Amisulpride	P09	P	09	384-L1700-01	369.48	71675-85-9	free base	Dopamine Receptor	Amisulpride is an atypical antipsychotic used to treat psychosis in schizophrenia and episodes of mania in bipolar disorder.	C1C(N(CC1)CC)CNC(C2=CC(=C(C=C2OC)N)S(CC)(=O)=O)=O	200	http://www.selleckchem.com/products/Amisulpride.html	Neuronal Signaling
32	S1438	Topiramate	P10	P	10	384-L1700-01	339.36	97240-79-4	free base	Carbonic Anhydrase	Topiramate is an anticonvulsant compound.	[C@H]12[C@H]([C@H]3[C@](OC1)(COS(N)(=O)=O)OC(O3)(C)C)OC(O2)(C)C	200	http://www.selleckchem.com/products/Topiramate.html	Metabolism
40	S1288	Camptothecin	P11	P	11	384-L1700-01	348.35	7689-03-4	free base	Topoisomerase	Camptothecin is a specific inhibitor of DNA topoisomerase I (Topo I) with IC50 of 0.68 μM. Phase 2.	O1C([C@@](C2=C(C1)C(N3C(=C2)C4=C(C3)C=C5C(=N4)C=CC=C5)=O)(CC)O)=O	10	http://www.selleckchem.com/products/Camptothecine.html	DNA Damage
40	S1451	Aurora A Inhibitor I	P12	P	12	384-L1700-01	588.07	1158838-45-9	free base	Aurora Kinase	Aurora A Inhibitor I is a novel, potent, and selective inhibitor of Aurora A with IC50 of 3.4 nM. It is 1000-fold more selective for Aurora A than Aurora B.	N1=CC(=C(N=C1NC2=CC=C(C=C2)CC(N3CCN(CC3)CC)=O)NC4=CC=C(C=C4)C(NC5=CC=CC=C5Cl)=O)F	200	http://www.selleckchem.com/products/Aurora-A-Inhibitor-I.html	Cell Cycle
48	S1302	Ifosfamide	P13	P	13	384-L1700-01	261.09	3778-73-2	free base	DNA/RNA Synthesis	Ifosfamide is a nitrogen mustard alkylating agent used in the treatment of cancer.	C1COP(N(C1)CCCl)(NCCCl)=O	199	http://www.selleckchem.com/products/Ifosfamide.html	DNA Damage
48	S1459	Thiazovivin	P14	P	14	384-L1700-01	311.36	1226056-71-8	free base	ROCK	Thiazovivin (Tzv) is a novel ROCK inhibitor with IC50 of 0.5 μM, promotes hESC survival after single-cell dissociation.	C1(SC=C(N=1)C(NCC2=CC=CC=C2)=O)NC3=CC=NC=N3	48	http://www.selleckchem.com/products/Thiazovivin.html	Cell Cycle
56	S1326	Edaravone	P15	P	15	384-L1700-01	174.2	89-25-8	free base	Others	Edaravone, a strong novel free radical scavenger, is used for treatment of patients with acute brain infarction.	C1(CC(N(N=1)C2=CC=CC=C2)=O)C	200	http://www.selleckchem.com/products/Edaravone.html	Others
56	S1470	TSU-68 (SU6668, Orantinib)	P16	P	16	384-L1700-01	310.35	252916-29-3	free base	VEGFR,PDGFR,FGFR	SU6668 has greatest potency against PDGFR autophosphorylation with Ki of 8 nM, but also strongly inhibits Flk-1 and FGFR1 trans-phosphorylation, little activity against IGF-1R, Met, Src, Lck, Zap70, Abl and CDK2; does not inhibit EGFR. Phase 3.	C1=CC=C2C(=C1)/C(C(N2)=O)=C/C3NC(=C(C=3C)CCC(O)=O)C	199	http://www.selleckchem.com/products/TSU-68(SU6668).html	Protein Tyrosine Kinase
64	S1336	Fluvoxamine maleate	P17	P	17	384-L1700-01	434.41	61718-82-9	maleate	5-HT Receptor	Fluvoxamine maleate is a selective serotonin (5-HT) reuptake inhibitor (SSRI).	C1(=CC=C(C=C1)/C(CCCCOC)=N/OCCN)C(F)(F)F.C(/C(=O)O)=C\C(=O)O	200	http://www.selleckchem.com/products/Fluvoxamine-maleate.html	Neuronal Signaling
64	S1482	Daclatasvir (BMS-790052)	P18	P	18	384-L1700-01	738.88	1009119-64-5	free base	HCV Protease	BMS-790052 is a highly selective inhibitor of HCV NS5A with EC50 of 9-50 pM, for a broad range of HCV replicon genotypes and the JFH-1 genotype 2a infectious virus in cell culture. Phase 3.	C1=CC(=CC=C1C2=CN=C(N2)[C@H]3N(CCC3)C([C@H](C(C)C)NC(OC)=O)=O)C4=CC=C(C=C4)C5=CN=C(N5)[C@H]6N(CCC6)C([C@H](C(C)C)NC(OC)=O)=O	200	http://www.selleckchem.com/products/BMS-790052.html	Proteases
72	S1356	Levetiracetam	P19	P	19	384-L1700-01	170.21	102767-28-2	free base	Others	Levetiracetam is an antiepileptic compound.	C1(N(CCC1)[C@H](C(N)=O)CC)=O	199	http://www.selleckchem.com/products/Levetiracetam.html	Others
72	S1490	Ponatinib (AP24534)	P20	P	20	384-L1700-01	532.56	943319-70-8	free base	PDGFR,FGFR,VEGFR,Bcr-Abl	Ponatinib (AP24534) is a novel, potent multi-target inhibitor of Abl, PDGFRα, VEGFR2, FGFR1 and Src with IC50 of 0.37 nM, 1.1 nM, 1.5 nM, 2.2 nM and 5.4 nM, respectively.	C1C=NN2C(C=1)=NC=C2C#CC3=C(C=CC(=C3)C(=O)NC4=CC(=C(C=C4)CN5CCN(CC5)C)C(F)(F)F)C	56	http://www.selleckchem.com/products/AP24534.html	Angiogenesis
80	S1364	Epothilone B (EPO906, Patupilone)	P21	P	21	384-L1700-01	507.68	152044-54-7	free base	Microtubule Associated	Epothilone B is a Taxol-like microtubule-stabilizing agent with EC0.01 of 1.8 μM. Phase 2.	O1[C@@]2(CCC[C@@H]([C@@H]([C@H](C(C([C@@H](CC(O[C@H](C[C@H]12)/C(C)=C/C3N=C(SC=3)C)=O)O)(C)C)=O)C)O)C)C	200	http://www.selleckchem.com/products/Epothilone-B.html	Cytoskeletal Signaling
80	S1508	Alprostadil	P22	P	22	384-L1700-01	354.48	745-65-3	free base	Others	Alprostadil is used as a drug in the treatment of erectile dysfunction and has vasodilatory properties.	[C@@H]1([C@@H]([C@H](CC1=O)O)/C=C/[C@H](CCCCC)O)CCCCCCC(O)=O	200	http://www.selleckchem.com/products/Alprostadil(Caverject).html	Others
1	S1526	Quizartinib (AC220)	A03	A	03	384-L1700-02	560.67	950769-58-1	free base	FLT3	Quizartinib (AC220) is a second-generation FLT3 inhibitor for Flt3(ITD/WT) with IC50 of 1.1 nM/4.2 nM, 10-fold more selective for Flt3 than KIT, PDGFRα, PDGFRβ, RET, and CSF-1R. Phase 1/2.	C1=C(C=CC(=C1)C2N=C3N(C=2)C4C(S3)=CC(=CC=4)OCCN5CCOCC5)NC(NC6C=C(ON=6)C(C)(C)C)=O	59	http://www.selleckchem.com/products/AC-220.html	Angiogenesis
1	S1667	Trichlormethiazide	A04	A	04	384-L1700-02	380.66	133-67-5	free base	Others	Trichlormethiazide(Achletin) is a diuretic with properties similar to those of hydrochlorothiazide.	C1(=C(C=C2C(=C1)NC(NS2(=O)=O)C(Cl)Cl)S(=O)(=O)N)Cl	141	http://www.selleckchem.com/products/Trichlormethiazide(Achletin).html	Others
9	S1536	CP-673451	A05	A	05	384-L1700-02	417.5	343787-29-1	free base	PDGFR	CP 673451 is a selective inhibitor of PDGFRα/β with IC50 of 10 nM/1 nM, exhibits >450-fold selectivity over other angiogenic receptors, has antiangiogenic and antitumor activity.	C1=CC(=C2C(=C1)C=CC(=N2)N3C4=CC=C(C=C4N=C3)OCCOC)N5CCC(CC5)N	100	http://www.selleckchem.com/products/CP-673451.html	Protein Tyrosine Kinase
9	S1679	Flurbiprofen	A06	A	06	384-L1700-02	244.26	5104-49-4	free base	Others	Flurbiprofen is a member of the phenylalkanoic acid derivative family of non-steroidal anti-inflammatory drugs (NSAIDs).	C1(=C(C=CC(=C1)[C@@H](C(O)=O)C)C2=CC=CC=C2)F	200	http://www.selleckchem.com/products/Flurbiprofen(Ansaid).html	Others
17	S1548	Dapagliflozin	A07	A	07	384-L1700-02	408.87	461432-26-8	free base	SGLT	Dapagliflozin is a potent and selective hSGLT2 inhibitor with EC50 of 1.1 nM, exhibiting 1200-fold selectivity over hSGLT1. Phase 3.	C1(=CC=C(C(=C1)CC2=CC=C(C=C2)OCC)Cl)[C@@H]3O[C@@H]([C@H]([C@@H]([C@@H]3O)O)O)CO	200	http://www.selleckchem.com/products/Dapagliflozin.html	GPCR & G Protein
17	S1693	Carbamazepine	A08	A	08	384-L1700-02	236.27	298-46-4	free base	Autophagy,Sodium Channel	Carbamazepine (Carbatrol) is a sodium channel blocker with IC50 of 131 μM in rat brain synaptosomes.	N1(C(=O)N)C2=C(C=CC3=C1C=CC=C3)C=CC=C2	198	http://www.selleckchem.com/products/Carbamazepine(Carbatrol).html	Transmembrane Transporters
25	S1565	VX-809 (Lumacaftor)	A09	A	09	384-L1700-02	452.41	936727-05-8	free base	CFTR	VX-809 acts to correct CFTR mutations common in cystic fibrosis by increasing mutant CFTR (F508del-CFTR) maturation,EC50 of 0.1 μM. Phase 3.	C12=C(C=C(C=C1)C3(C(NC4=NC(=C(C=C4)C)C5=CC=CC(=C5)C(O)=O)=O)CC3)OC(O2)(F)F	201	http://www.selleckchem.com/products/VX-809.html	Transmembrane Transporters
25	S1708	Hydrochlorothiazide	A10	A	10	384-L1700-02	297.74	58-93-5	free base	Others	Hydrochlorothiazide is a first line diuretic compound of the thiazide class.	C1(=C(C=C2C(=C1)NCNS2(=O)=O)S(N)(=O)=O)Cl	201	http://www.selleckchem.com/products/Hydrochlorothiazide.html	Others
33	S1575	RO4929097	A11	A	11	384-L1700-02	469.4	847925-91-1	Free Base	Gamma-secretase	RO4929097 is a γ secretase inhibitor with IC50 of 4 nM, inhibiting cellular processing of Aβ40 and Notch with EC50 of 14 nM and 5 nM, respectively. Phase 2.	O=C1NC2=C(C3=C([C@H]1NC(C(C(NCC(C(F)(F)F)(F)F)=O)(C)C)=O)C=CC=C3)C=CC=C2	94	www.selleckchem.com/products/RO4929097.html	Proteases
33	S1719	Zalcitabine	A12	A	12	384-L1700-02	211.22	7481-89-2	free base	Reverse Transcriptase	Zalcitabine is a nucleoside analog HIV reverse transcriptase inhibitor (NARTI).	[C@H]1(CC[C@@H](O1)N2C(N=C(C=C2)N)=O)CO	198	http://www.selleckchem.com/products/Zalcitabine.html	Microbiology
41	S1601	Reserpine	A13	A	13	384-L1700-02	608.68	50-55-5	free base	Others	Reserpine is an indole alkaloid antipsychotic and antihypertensive drug that has been used for the control of high blood pressure and for the relief of psychotic symptoms.	C12=C([C@@]3(N(CC1)C[C@@]4([C@](C3)([C@@H]([C@H]([C@@H](C4)OC(=O)C5=CC(=C(C(=C5)OC)OC)OC)OC)C(OC)=O)[H])[H])[H])NC6=C2C=CC(=C6)OC	21	http://www.selleckchem.com/products/Reserpine.html	Others
41	S1733	Methylprednisolone	A14	A	14	384-L1700-02	374.47	83-43-2	free base	Others	Methylprednisolone is a synthetic corticosteroid with anti-inflammatory and immunomodulating properties.	C1C(C=C2[C@](C=1)([C@]3([C@@](C[C@@H]2C)([C@]4([C@](C[C@H]3O)([C@@](CC4)(C(CO)=O)O)C)[H])[H])[H])C)=O	200	http://www.selleckchem.com/products/Methylprednisolone.html	Others
49	S1610	Metolazone	A15	A	15	384-L1700-02	365.83	17560-51-9	free base	Others	Metolazone(Zaroxolyn) is primarily used to treat congestive heart failure and high blood pressure.	C1(=C(C=C2C(=C1)NC(N(C2=O)C3=CC=CC=C3C)C)S(=O)(=O)N)Cl	199	http://www.selleckchem.com/products/Metolazone(Zaroxolyn).html	Others
49	S1741	Rifabutin	A16	A	16	384-L1700-02	847	72559-06-9	free base	Others	Rifabutin(Mycobutin) is a semisynthetic ansamycin antibiotic with potent antimycobacterial properties.	[C@@H]1([C@H]([C@@H]([C@@H]([C@@H]([C@H]([C@H](/C=C/C=C(/C(NC2=C3C(C4=C(C2=O)C(=C(C5=C4C([C@](O5)(O/C=C/[C@@H]1OC)C)=O)C)O)=NC6(N3)CCN(CC6)CC(C)C)=O)C)C)O)C)O)C)OC(=O)C)C	70	http://www.selleckchem.com/products/Rifabutin(Mycobutin).html	Others
57	S1622	Prednisone	A17	A	17	384-L1700-02	358.43	53-03-2	free base	Others	Prednisone (Adasone) is a synthetic corticosteroid agent that is particularly effective as an immunosuppressant compound.	C1C(C=C2[C@](C=1)([C@]3([C@@](CC2)([C@]4([C@](CC3=O)([C@@](CC4)(C(CO)=O)O)C)[H])[H])[H])C)=O	200	http://www.selleckchem.com/products/Prednisone.html	Others
57	S1761	Suprofen	A18	A	18	384-L1700-02	260.31	40828-46-4	free base	Others	Suprofen(Profenal) is an NSAID.	C1(=CC=C(C=C1)C(C(O)=O)C)C(C2SC=CC=2)=O	199	http://www.selleckchem.com/products/Suprofen(Profenal).html	Others
65	S1631	Allopurinol Sodium	A19	A	19	384-L1700-02	159.1	17795-21-0	Sodium Salt	Others	Allopurinol Sodium is a xanthine oxidase inhibitor with an IC50 of 7.82±0.12 μM.	C1(=NC2=C(C(N1)=O)C=NN2).[Na+]	32	www.selleckchem.com/products/Allopurinol-Sodium(Aloprim).html	Others
65	S1773	Oxytetracycline (Terramycin)	A20	A	20	384-L1700-02	460.43	79-57-2	free base	Others	Oxytetracycline(Terramycin) was the second of the broad-spectrum tetracycline group of antibiotics to be discovered.	C1(=C([C@H]([C@]2([C@@](C1=O)(C(C3[C@]([C@@H]2O)([C@@](C4=C(C=3O)C(=CC=C4)O)(O)C)[H])=O)O)[H])N(C)C)O)C(N)=O	199	http://www.selleckchem.com/products/Oxytetracycline(Terramycin).html	Others
73	S1643	Ursodiol	A21	A	21	384-L1700-02	392.57	128-13-2	free base	Others	Ursodiol reduces cholesterol absorption and is used to dissolve (cholesterol) gallstones. (IC50=0.22 μM	C1[C@H](C[C@@]2([C@](C1)([C@]3([C@@]([C@H](C2)O)([C@]4([C@](CC3)([C@@](CC4)([C@H](C)CCC(O)=O)[H])C)[H])[H])[H])C)[H])O	201	http://www.selleckchem.com/products/Ursodiol(Actigal).html	Others
73	S1792	Simvastatin	A22	A	22	384-L1700-02	418.57	79902-63-9	free base	Others	Simvastatin is a competitive inhibitor of HMG-CoA reductase with Ki of 0.1-0.2 nM .	C1[C@H](C=C2[C@]([C@@H]1OC(=O)C(CC)(C)C)([C@@H]([C@H](C=C2)C)CC[C@]3(OC(C[C@@H](C3)O)=O)[H])[H])C	200	http://www.selleckchem.com/products/Simvastatin(Zocor).html	Others
1	S1830	Oxfendazole	B03	B	03	384-L1700-02	315.35	53716-50-0	free base	Others	Oxfendazole is the sulfoxide form of fenbendazole which is a broad spectrum benzimidazole anthelmintic.	S(C1=CC2=C(C=C1)N=C(N2)NC(OC)=O)(C3=CC=CC=C3)=O	31	http://www.selleckchem.com/products/oxfendazole.html	Others
1	S2013	PF-573228	B04	B	04	384-L1700-02	491.49	869288-64-2	free base	FAK	PF-573228 is an ATP-competitive inhibitor of FAK with IC50 of 4 nM, ~50- to 250-fold selective for FAK than Pyk2, CDK1/7 and GSK-3β.	N1C(CCC2C=C(C=CC1=2)NC3N=C(C(=CN=3)C(F)(F)F)NCC4C=C(C=CC=4)S(=O)(=O)C)=O	52	http://www.selleckchem.com/products/pf-573228.html	Angiogenesis
9	S1843	Chenodeoxycholic Acid	B05	B	05	384-L1700-02	392.57	474-25-9	free base	Others	Chenodeoxycholic acid is a naturally occurring human bile acid.	C1[C@H](C[C@@]2([C@](C1)([C@]3([C@@]([C@@H](C2)O)([C@]4([C@](CC3)([C@](CC4)([H])[C@@H](CCC(O)=O)C)C)[H])[H])[H])C)[H])O	201	http://www.selleckchem.com/products/Chenodeoxycholic-acid.html	Others
9	S2025	Urapidil HCl	B06	B	06	384-L1700-02	423.94	64887-14-5	hydrochloride	5-HT Receptor	Urapidil hydrochloride is a hydrochloride salt form of urapidil which is α1-adrenoceptor antagonist and 5-HT1A receptor agonist with pIC50 of 6.13 and 6.4 respectively.	N1(C(N(C(=CC1=O)NCCCN2CCN(CC2)C3=CC=CC=C3OC)C)=O)C.Cl	56	http://www.selleckchem.com/products/urapidil-hydrochloride.html	Neuronal Signaling
17	S1859	Diethylstilbestrol	B07	B	07	384-L1700-02	268.35	56-53-1	free base	Others	Diethylstilbestrol, a synthetic nonsteroidal estrogen used in the treatment of menopausal and postmenopausal disorders.	C1(=CC=C(C=C1)/C(=C(/C2=CC=C(C=C2)O)CC)CC)O	201	http://www.selleckchem.com/products/Diethylstilbestrol(Stilbestrol).html	Others
17	S2036	Aspartame	B08	B	08	384-L1700-02	294.3	22839-47-0	free base	Others	Aspartame is an artificial, non-saccharide sweetener used as a sugar substitute in some foods and beverages.	C(C[C@@H](C(N[C@H](C(OC)=O)CC1=CC=CC=C1)=O)N)(O)=O	112	http://www.selleckchem.com/products/aspartame.html	Others
25	S1883	Idoxuridine	B09	B	09	384-L1700-02	354.1	54-42-2	free base	Others	Idoxuridine is an antiviral agent for feline herpesvirus type-1 with IC50 of 4.3 µM.	C1(=CN(C(NC1=O)=O)[C@@H]2O[C@@H]([C@H](C2)O)CO)I	10	http://www.selleckchem.com/products/idoxuridine.html	Others
25	S2045	Doxifluridine	B10	B	10	384-L1700-02	246.19	3094-09-5	free base	Others	Doxifluridine is a thymidine phosphorylase activator for PC9-DPE2 cells with IC50 of 0.62 μM.	N1C(C(=CN(C1=O)[C@@H]2O[C@@H]([C@H]([C@@H]2O)O)C)F)=O	199	http://www.selleckchem.com/products/doxifluridine.html	Others
33	S1895	Dipyridamole	B11	B	11	384-L1700-02	504.63	58-32-2	free base	Others	Dipyridamole (Persantine) is a phosphodiesterase inhibitor that blocks uptake and metabolism of adenosine by erythrocytes and vascular endothelial cells.	N1C(=NC2=C(C=1N3CCCCC3)N=C(N=C2N4CCCCC4)N(CCO)CCO)N(CCO)CCO	200	http://www.selleckchem.com/products/Dipyridamole(Permole,-Persantine).html	Others
33	S2059	Terazosin HCl	B12	B	12	384-L1700-02	459.92	70024-40-7	hydrochloride	Adrenergic Receptor	Hytrin (terazosin) is an alpha-adrenergic blocker used to treat high blood pressure and enlarged prostate.	C12(=C(C(=NC(=N1)N3CCN(CC3)C(C4CCCO4)=O)N)C=C(C(=C2)OC)OC).Cl.O.O	56	http://www.selleckchem.com/products/terazosin-hydrochloride-hytrin.html	Neuronal Signaling
41	S1905	Amlodipine	B13	B	13	384-L1700-02	408.88	88150-42-9	free base	Calcium Channel	Amlodipine(Norvasc) is a long-acting calcium channel blocker with an IC50 of 1.9 nM.	N1C(=C(C(C(=C1C)C(=O)OC)C2=C(C=CC=C2)Cl)C(OCC)=O)COCCN	200	http://www.selleckchem.com/products/Amlodipine(Norvasc).html	Transmembrane Transporters
41	S2069	Argatroban	B14	B	14	384-L1700-02	508.63	74863-84-6	free base	Others	Argatroban is an anticoagulant that is a small molecule direct thrombin inhibitor.	NC(NCCC[C@@](C(N1CC[C@H](C[C@H]1C(=O)O)C)=O)(NS(C2=CC=CC3=C2NCC(C3)C)(=O)=O)[H])=N	17	http://www.selleckchem.com/products/argatroban.html	Others
49	S1916	Sulfisoxazole	B15	B	15	384-L1700-02	267.3	127-69-5	free base	Others	Sulfisoxazole is a sulfonamide antibacterial with an oxazole substituent.	C1=C(C=CC(=C1)S(NC2=C(C(=NO2)C)C)(=O)=O)N	198	http://www.selleckchem.com/products/Sulfisoxazole.html	Others
49	S2084	Duloxetine HCl	B16	B	16	384-L1700-02	333.88	136434-34-9	hydrochloride	5-HT Receptor	Duloxetine is a serotonin-norepinephrine reuptake inhibitor with Ki of 4.6 nM, used for treatment of major depressive disorder and generalized anxiety disorder (GAD).	C1(=CC(=C2C(=C1)C=CC=C2)O[C@@H](CCNC)C3SC=CC=3).Cl	200	http://www.selleckchem.com/products/duloxetine-hcl-cymbalta.html	Neuronal Signaling
57	S1937	Isoniazid	B17	B	17	384-L1700-02	137.14	54-85-3	free base	Others	Isoniazid is a prodrug and must be activated by bacterial catalase.	C1=CN=CC=C1C(NN)=O	196	http://www.selleckchem.com/products/Isoniazid(Tubizid).html	Others
57	S2098	Bexarotene	B18	B	18	384-L1700-02	348	153559-49-0	free base	Others	Bexarotene is a retinoid specifically selective for retinoid X receptors, used as an oral antineoplastic agent in the treatment of cutaneous T-cell lymphoma.	C12=C(C=C(C(=C1)C)C(C3=CC=C(C=C3)C(=O)O)=C)C(CCC2(C)C)(C)C	22	http://www.selleckchem.com/products/bexarotene.html	Others
65	S1959	Tolfenamic Acid	B19	B	19	384-L1700-02	261.7	13710-19-5	free base	COX	Tolfenamic acid is a COX-2 inhibitor with IC50 of 0.2 μM.	C1(NC2=CC=CC(=C2C)Cl)=C(C=CC=C1)C(O)=O	198	http://www.selleckchem.com/products/tolfenamic-acid.html	Neuronal Signaling
65	S2113	Cisatracurium Besylate	B20	B	20	384-L1700-02	1243.48	96946-42-8	besylate	Adrenergic Receptor	Cisatracurium Besylate is a nondepolarizing neuromuscular blocking agent, antagonizing the action of acetylcholine by inhibiting neuromuscular transmission.	C1(=C(C=C2C(=C1)CC[N@@+]([C@@H]2CC3=CC=C(C(=C3)OC)OC)(CCC(OCCCCCOC(CC[N@@+]4([C@@H](C5=CC(=C(C=C5CC4)OC)OC)CC6=CC=C(C(=C6)OC)OC)C)=O)=O)C)OC)OC.C7(=CC=CC=C7S([O-])(=O)=O).C8=CC=CC=C8S([O-])(=O)=O	200	http://www.selleckchem.com/products/cisatracurium-besylate-nimbex.html	Neuronal Signaling
73	S1973	Cyclocytidine HCl	B21	B	21	384-L1700-02	261.66	10212-25-6	hydrochloride	Others	Cyclocytidine is the prodrug of cytarabine, which is a pyrimidine nucleoside analog that inhibits the DNA synthesis and used mainly in the treatment of leukemia.	C1(=CC(N=C2N1[C@H]3[C@@H]([C@H]([C@H](O3)CO)O)O2)=N).Cl	10	http://www.selleckchem.com/products/cyclocytidine-hcl.html	Others
73	S2124	Xylose	B22	B	22	384-L1700-02	150.13	25990-60-7	free base	Others	Xylose is a sugar first isolated from wood.	OC[C@H]([C@@H]([C@H](C=O)O)O)O	199	http://www.selleckchem.com/products/Xylose.html	Others
2	S1528	LY2811376	C03	C	03	384-L1700-02	320.36	1194044-20-6	free base	Beta Amyloid,Gamma-secretase	LY2811376 is the first orally available non-peptidic β-secretase(BACE1) inhibitor with IC50 of 239 nM-249 nM, that act to decrease Aβ secretion with EC50 of 300 nM, demonstrated to have 10-fold selectivity towards BACE1 over BACE2, and more than 50-fold inhibition over other aspartic proteases including cathepsin D, pepsin, or renin. Phase 1.	C1=NC=C(C=N1)C2=C(C=C(C(=C2)[C@]3(N=C(SCC3)N)C)F)F	49	http://www.selleckchem.com/products/LY2811376.html	Proteases
2	S1669	Loteprednol etabonate	C04	C	04	384-L1700-02	466.95	82034-46-6	free base	Others	Loteprednol etabonate is an anti-inflammatory corticosteroid used in ophthalmology.	C1C(C=C2[C@](C=1)([C@]3([C@@](CC2)([C@]4([C@](C[C@H]3O)([C@@](CC4)(C(OCCl)=O)OC(OCC)=O)C)[H])[H])[H])C)=O	199	http://www.selleckchem.com/products/Loteprednol-etabonate.html	Others
10	S1537	DMXAA (Vadimezan)	C05	C	05	384-L1700-02	282.29	117570-53-3	free base	VDA	DMXAA (Vadimezan) is a vascular disrupting agents (VDA) and competitive inhibitor of DT-diaphorase with Ki of 20 μM and IC50 of 62.5 μM, respectively. Phase 3.	C12=C(C(=CC=C1)CC(O)=O)OC3=C(C2=O)C=CC(=C3C)C	24	http://www.selleckchem.com/products/DMXAA(ASA404).html	Angiogenesis
10	S1680	Disulfiram	C06	C	06	384-L1700-02	296.54	97-77-8	free base	Others	Disulfiram is an agent used to support the treatment of chronic alcoholism by producing an acute sensitivity to alcohol.	CCN(C(SSC(N(CC)CC)=S)=S)CC	198	http://www.selleckchem.com/products/Disulfiram(Antabuse).html	Others
18	S1549	Nebivolol	C07	C	07	384-L1700-02	441.9	152520-56-4	hydrochloride	Adrenergic Receptor	Nebivolol selectively inhibits β1-adrenoceptor with IC50 of 0.8 nM.	C1(=C(C=C2C(=C1)O[C@](CC2)([C@@H](CNC[C@H]([C@@]3(CCC4=C(O3)C=CC(=C4)F)[H])O)O)[H])F).Cl	199	http://www.selleckchem.com/products/Nebivolol(Bystolic).html	Neuronal Signaling
18	S1696	Hydrocortisone	C08	C	08	384-L1700-02	362.46	50-23-7	free base	Others	Hydrocortisone is a steroid hormone or glucocorticoid produced by the adrenal gland.	C1C(C=C2[C@](C1)([C@]3([C@@](CC2)([C@]4([C@](C[C@H]3O)([C@@](CC4)(C(=O)CO)O)C)[H])[H])[H])C)=O	201	http://www.selleckchem.com/products/Hydrocortisone.html	Others
26	S1567	Pomalidomide	C09	C	09	384-L1700-02	273.24	19171-19-8	free base	TNF-alpha	Pomalidomide inhibits LPS-induced TNF-α release with IC50 of 13 nM.	C1=CC=C2C(=C1N)C(N(C2=O)C3C(NC(CC3)=O)=O)=O	201	http://www.selleckchem.com/products/Pomalidomide(CC-4047).html	Apoptosis
26	S1709	Estradiol	C10	C	10	384-L1700-02	272.38	50-28-2	free base	Others	Estradiol is the predominant sex hormone.	C1C(=CC2=C(C=1)[C@]3([C@@](CC2)([C@]4([C@](CC3)([C@@H](CC4)O)C)[H])[H])[H])O	198	http://www.selleckchem.com/products/Estradiol.html	Others
34	S1576	Sulfasalazine	C11	C	11	384-L1700-02	398.39	599-79-1	free base	Others	Sulfasalazine is a sulfa agent and a derivative of mesalazine used primarily as an anti-inflammatory agent.	C1(NS(C2=CC=C(C=C2)/N=N/C3=CC(=C(C=C3)O)C(=O)O)(=O)=O)=CC=CC=N1	200	http://www.selleckchem.com/products/Sulfasalazine(Azulfidine).html	Others
34	S1721	Azathioprine	C12	C	12	384-L1700-02	277.26	446-86-6	free base	Others	Azathioprine(Azasan, Imuran) is a drug that suppresses the immune system and is used in organ transplantation and autoimmune disease.	N1=CN=C2C(=C1SC3=C(N=CN3C)[N+](=O)[O-])NC=N2	194	http://www.selleckchem.com/products/Azathioprine(Azasan).html	Others
42	S1603	Furosemide	C13	C	13	384-L1700-02	330.74	54-31-9	free base	Others	Furosemide(Lasix) is a loop diuretic used in the treatment of congestive heart failure and edema.	C1(=CC(=C(C=C1NCC2=CC=CO2)Cl)S(N)(=O)=O)C(O)=O	199	http://www.selleckchem.com/products/Furosemide(Lasix).html	Others
42	S1734	Meloxicam	C14	C	14	384-L1700-02	351.4	71125-38-7	free base	Others	Meloxicam (Mobic) is a nonsteroidal anti-inflammatory agent with analgesic and fever reducer effects.	C1(N(S(C2=C(C=1O)C=CC=C2)(=O)=O)C)C(=O)NC3=NC=C(S3)C	85	http://www.selleckchem.com/products/Meloxicam(Mobic).html	Others
50	S1611	Cefoperazone	C15	C	15	384-L1700-02	645.67	62893-19-0	free base	Others	Cefoperazone is a cephalosporin antibiotic for inhibition of rMrp2-mediated [3H]E217βG uptake with IC50 of 199 μM.	C1(CS[C@]2(N(C=1C(=O)O)C([C@H]2NC(=O)[C@@H](C3=CC=C(C=C3)O)NC(N4C(C(N(CC4)CC)=O)=O)=O)=O)[H])CSC5=NN=NN5C	199	http://www.selleckchem.com/products/cefoperazone-cefobid.html	Others
50	S1742	Nevirapine	C16	C	16	384-L1700-02	266.3	129618-40-2	free base	Reverse Transcriptase	Nevirapine(Viramune) is a non-nucleoside reverse transcriptase inhibitor (NNRTI) used to treat HIV-1 infection and AIDS.	N1(C2CC2)C3=C(NC(C4=C1N=CC=C4)=O)C(=CC=N3)C	199	http://www.selleckchem.com/products/Nevirapine(Viramune).html	Microbiology
58	S1623	Acetylcysteine	C17	C	17	384-L1700-02	163.19	616-91-1	free base	Others,AChR	Acetylcysteine is a pharmaceutical drug and nutritional supplement used primarily as a mucolytic agent and in the management of paracetamol (acetaminophen) overdose.	C(C)(N[C@](C(O)=O)(CS)[H])=O	202	http://www.selleckchem.com/products/Acetylcysteine.html	Others
58	S1762	Pyrazinamide	C18	C	18	384-L1700-02	123.11	98-96-4	free base	Others	Pyrazinamide is an agent used to treat tuberculosis.	C1=CN=CC(=N1)C(=O)N	203	http://www.selleckchem.com/products/Pyrazinamide(Pyrazinoic-acid-amide).html	Others
66	S1633	Zafirlukast	C19	C	19	384-L1700-02	575.68	107753-78-6	free base	Others	Zafirlukast is a leukotriene receptor antagonist (LTRA). (IC50=0.6μM, IC50=7.0 µM for CYP2C9)	C12=C(C=C(C=C1)NC(OC3CCCC3)=O)C(=CN2C)CC4=CC=C(C=C4OC)C(=O)NS(C5=CC=CC=C5C)(=O)=O	173	http://www.selleckchem.com/products/Zafirlukast(Accolate).html	Others
66	S1776	Toremifene Citrate	C20	C	20	384-L1700-02	598.08	89778-27-8	citrate	Estrogen/progestogen Receptor	Toremifene Citrate is an oral selective estrogen receptor modulator (SERM) which helps oppose the actions of estrogen in the body.	C1(=C(C=CC(=C1)/C(C2=CC=CC=C2)=C(\C3=CC=CC=C3)CCCl)OCCN(C)C).OC(CC(CC(=O)O)(C(=O)O)O)=O	200	www.selleckchem.com/products/Toremifene-Citrate(Fareston).html	Endocrinology & Hormones
74	S1644	Nitrofural	C21	C	21	384-L1700-02	198.14	59-87-0	free base	Others	Nitrofural is a topical anti-infective agent with an IC50 of 22.83 ± 1.2 μM. (Rat LD50 = 590 mg/kg)	C1(=CC=C(O1)/C=N/NC(N)=O)[N+]([O-])=O	201	http://www.selleckchem.com/products/Nitrofurazone(ACTIN-N).html	Others
74	S1793	Ramipril	C22	C	22	384-L1700-02	416.51	87333-19-5	free base	RAAS	Ramipril is an angiotensin-converting enzyme (ACE) inhibitor with IC50 of 5 nM.	C1=CC=CC=C1CC[C@@H](C(=O)OCC)N[C@H](C(N2[C@H](C[C@H]3[C@H](CCC3)2)C(O)=O)=O)C	199	http://www.selleckchem.com/products/Ramipril(Altace).html	Endocrinology & Hormones
2	S1831	Carvedilol	D03	D	03	384-L1700-02	406.47	72956-09-3	free base	Adrenergic Receptor	Carvedilol is a non-selective beta blocker/alpha-1 blocker with an IC50 of 3.8 μM for inhibition of LDL oxidation.	C12=CC=CC(=C1C3=C(N2)C=CC=C3)OCC(CNCCOC4=CC=CC=C4OC)O	199	http://www.selleckchem.com/products/carvedilol.html	Neuronal Signaling
2	S2014	BMS-265246	D04	D	04	384-L1700-02	345.34	582315-72-8	free base	CDK	BMS-265246 is a potent and selective CDK1/2 inhibitor with IC50 of 6 nM/9 nM. It is 25-fold more selective for CDK1/2 than CDK4.	C(=O)(C1C(=CC(=CC=1F)C)F)C2C(=C3C(=NC=2)NN=C3)OCCCC	57	http://www.selleckchem.com/products/bms-265246.html	Cell Cycle
10	S1845	Cimetidine	D05	D	05	384-L1700-02	252.34	51481-61-9	free base	Histamine Receptor	Cimetidine(Tagamet), a histamine congener, competitively inhibits histamine binding to histamine H2 receptors.	C1(=C(N=CN1)CSCCN/C(=N/C#N)NC)C	202	http://www.selleckchem.com/products/Cimetidine(Tagamet).html	Neuronal Signaling
10	S2026	Ginkgolide A	D06	D	06	384-L1700-02	408.4	15291-75-5	free base	GABA Receptor	Ginkgolide A is an extract from in Ginkgo biloba and a g-aminobutyric acid (GABA) antagonist with a Ki of 14.5 μM.	O=C1[C@]([C@]2([C@@](O1)(CC34[C@@]52C(O[C@@]3(C[C@](C64[C@@H](OC([C@]6(O)[H])=O)O5)(C(C)(C)C)[H])[H])=O)[H])O)(C)[H]	200	http://www.selleckchem.com/products/ginkgolide-a.html	Neuronal Signaling
18	S1865	Diltiazem HCl	D07	D	07	384-L1700-02	450.98	33286-22-5	hydrochloride	Others	Diltiazem HCl (Tiazac) is a benzothiazepine derivative with vasodilating action due to its antagonism of the actions of the calcium ion in membrane functions.	C12(N(C([C@@H]([C@@H](SC=1C=CC=C2)C3=CC=C(C=C3)OC)OC(C)=O)=O)CCN(C)C).Cl	199	http://www.selleckchem.com/products/Diltiazem-HCl(Tiazac).html	Others
18	S2037	Candesartan Cilexetil	D08	D	08	384-L1700-02	610.66	145040-37-5	free base	RAAS	Candesartan Cilexetil is a specific nonpeptide Ang II receptor (ATR) antagonist and the prodrug of candesartan which is an ATR antagonist with an IC50 of 15 μg/kg	C1CCCC(C1)OC(OC(OC(=O)C2=CC=CC3=C2N(C(=N3)OCC)CC4=CC=C(C=C4)C5=C(C=CC=C5)C6=NN=NN6)C)=O	199	http://www.selleckchem.com/products/Candesartan-cilexetil-Atacand.html	Endocrinology & Hormones
26	S1884	Sparfloxacin	D09	D	09	384-L1700-02	392.4	110871-86-8	free base	Others	Sparfloxacin is a fluoroquinolone antibiotic, shows broad and potent antibacterial activity.	[C@@H]1(N[C@H](CN(C1)C2=C(C3=C(C(=C2F)N)C(C(=CN3C4CC4)C(O)=O)=O)F)C)C	22	http://www.selleckchem.com/products/sparfloxacin.html	Others
26	S2046	Pioglitazone HCl	D10	D	10	384-L1700-02	392.9	112529-15-4	hydrochloride	P450 (e.g. CYP17)	Pioglitazone HCl is a hydrochloride salt form of pioglitazone which is a cytochrome P450 (CYP)2C8 and CYP3A4 enzymes inhibitor for CYP2C8, CYP3A4 and CYP2C9 with Ki of 1.7 μM, 11.8 μM and 32.1 μM, respectively.	C1(=CC=C(N=C1)CCOC2=CC=C(C=C2)CC3C(NC(S3)=O)=O)CC.Cl	201	http://www.selleckchem.com/products/pioglitazone-hydrochloride-actos.html	Metabolism
34	S1896	Hydroxyurea	D11	D	11	384-L1700-02	76.05	127-07-1	free base	Others	Hydroxyurea is an antineoplastic agent that inhibits DNA synthesis through the inhibition of ribonucleoside diphosphate reductase.	N(C(N)=O)O	197	http://www.selleckchem.com/products/Hydroxyurea(Cytodrox).html	Others
34	S2060	Bromhexine HCl	D12	D	12	384-L1700-02	412.59	611-75-6	hydrochloride	Others	Bromhexine hydrochloride is a medication prescribed for coughs which works by dissolving hard phlegm.	C1(=CC(=C(C(=C1)CN(C)C2CCCCC2)N)Br)Br.Cl	14	http://www.selleckchem.com/products/bromhexine-hydrochloride.html	Others
42	S1907	Metronidazole	D13	D	13	384-L1700-02	171.15	443-48-1	free base	Others	Metronidazole(Flagyl)is a nitroimidazole antibiotic medication used particularly for anaerobic bacteria and protozoa.	N1(CCO)C(=CN=C1C)[N+](=O)[O-]	198	http://www.selleckchem.com/products/Metronidazole(Flagyl).html	Others
42	S2074	Mecarbinate	D14	D	14	384-L1700-02	233.26	15574-49-9	free base	Others	Mecarbinate is a chemical intermediate of arbidol hydrochloride.	C1=C(C=C2C(=C1)N(C(=C2C(=O)OCC)C)C)O	201	http://www.selleckchem.com/products/mecarbinate.html	Others
50	S1917	Crystal Violet	D15	D	15	384-L1700-02	407.98	548-62-9	chlorate	Others	Crystal violet is a triarylmethane dye.	C1(=CC(=CC=C1N(C)C)C(C2=CC=C(C=C2)N(C)C)=C3C=CC(C=C3)=[N+](C)C).[Cl-]	200	http://www.selleckchem.com/products/Crystal-violet.html	Others
50	S2085	Trimebutine	D16	D	16	384-L1700-02	387.47	39133-31-8	free base	Opioid Receptor	Trimebutine is an agonist of peripheral mu, kappa and delta opiate receptors, used as spasmolytic agent for treatment of both acute and chronic abdominal pain.	C1(=C(C(=CC(=C1)C(OCC(C2=CC=CC=C2)(CC)N(C)C)=O)OC)OC)OC	129	http://www.selleckchem.com/products/trimebutine.html	Neuronal Signaling
58	S1940	Levofloxacin	D17	D	17	384-L1700-02	361.37	100986-85-4	free base	Others	Levofloxacin is a synthetic fluoroquinolone (fluoroquinolones) antibacterial agent.	C12=C3C=C(C(=C1OC[C@](N2C=C(C3=O)C(=O)O)(C)[H])N4CCN(CC4)C)F	66	http://www.selleckchem.com/products/Levofloxacin(Levaquin).html	Others
58	S2099	Temocapril HCl	D18	D	18	384-L1700-02	513.07	110221-44-8	hydrochloride	RAAS	Temocapril HCl is the hydrochloride of Temocapril, which is a long-acting angiotensin-converting enzyme (ACE) inhibitor, used for the treatment of hypertension.	C1(=CC=CC(=C1)CC[C@H](N[C@@H]2C(N(C[C@H](SC2)C3SC=CC=3)CC(O)=O)=O)C(OCC)=O).Cl	200	http://www.selleckchem.com/products/temocapril-hcl.html	Endocrinology & Hormones
66	S1960	Pranoprofen	D19	D	19	384-L1700-02	255.27	52549-17-4	free base	Others	Pranoprofen is a PGE2 inhibitor with IC50 of 7.5 μM.	C1=CN=C2C(=C1)CC3=C(O2)C=CC(=C3)C(C(O)=O)C	199	http://www.selleckchem.com/products/pranoprofen.html	Others
66	S2114	Dronedarone HCl	D20	D	20	384-L1700-02	593.22	141625-93-6	hydrochloride	Others	Dronedarone HCl is a therapy for the treatment of patients with paroxysmal and persistent atrial fibrillation or atrial flutter.	C1(=CC=C2C(=C1)C(=C(O2)CCCC)C(=O)C3=CC=C(C=C3)OCCCN(CCCC)CCCC)NS(=O)(C)=O.Cl	134	http://www.selleckchem.com/products/dronedarone-hcl-multaq.html	Others
74	S1974	Meglumine	D21	D	21	384-L1700-02	195.21	6284-40-8	free base	Others	Meglumine is an amino sugar derived from sorbitol for THP-1 cells with IC50 of 22 μg/mL.	CNC[C@@H]([C@H]([C@@H]([C@@H](CO)O)O)O)O	199	http://www.selleckchem.com/products/meglumine.html	Others
74	S2125	Mestranol	D22	D	22	384-L1700-02	310.43	72-33-3	free base	Others	Mestranol is the 3-methyl ether of ethinylestradiol. It was the estrogen used in many of the first oral contraceptives.	C1C(=CC2=C(C=1)[C@]3([C@@](CC2)([C@]4([C@](CC3)([C@](CC4)(C#C)O)C)[H])[H])[H])OC	48	http://www.selleckchem.com/products/Mestranol.html	Others
3	S1529	Hesperadin	E03	E	03	384-L1700-02	516.65	422513-13-1	free base	Aurora Kinase	Hesperadin potently inhibits Aurora B with IC50 of 250 nM. It markedly reduces the activity of AMPK, Lck, MKK1, MAPKAP-K1, CHK1 and PHK while it does not inhibit MKK1 activity in vivo.	C1(=CC=C2C(=C1)/C(C(N2)=O)=C(\C3=CC=CC=C3)NC4=CC=C(C=C4)CN5CCCCC5)NS(CC)(=O)=O	199	http://www.selleckchem.com/products/Hesperadin.html	Cell Cycle
3	S1671	（6-）ε-​Aminocaproic acid	E04	E	04	384-L1700-02	131.17	60-32-2	free base	Others	（6-）ε-​Aminocaproic acid is a derivative and analogue of the amino acid lysine.	NCCCCCC(O)=O	45	http://www.selleckchem.com/products/Aminocaproic-acid(Amicar).html	Others
11	S1538	Telaprevir (VX-950)	E05	E	05	384-L1700-02	679.85	402957-28-2	free base	HCV Protease	Telaprevir (VX-950) is an HCV NS3-4A serine protease inhibitor with IC50 of 0.35 μM.	[C@@]12([C@](CN([C@H]1C(=O)N[C@@H](CCC)C(=O)C(=O)NC3CC3)C(=O)[C@H](C(C)(C)C)NC(=O)[C@@H](NC(=O)C4=NC=CN=C4)C5CCCCC5)(CCC2)[H])[H]	200	http://www.selleckchem.com/products/Telaprevir(VX-950).html	Proteases
11	S1681	Mesalamine	E06	E	06	384-L1700-02	153.14	89-57-6	free base	Others	Mesalamine is an anti-inflammatory compound.	C1=C(C(=CC=C1N)O)C(O)=O	202	http://www.selleckchem.com/products/Mesalamine(Lialda).html	Others
19	S1550	Pimobendan	E07	E	07	384-L1700-02	334.37	74150-27-9	free base	PDE	Pimobendan is a selective inhibitor of PDE3 with IC50 of 0.32 μM.	C1=C2C(=CC=C1C3C(CC(NN=3)=O)C)NC(=N2)C4=CC=C(C=C4)OC	200	http://www.selleckchem.com/products/Pimobendan(Vetmedin).html	Metabolism
19	S1701	Desonide	E08	E	08	384-L1700-02	416.51	638-94-8	free base	Others	Desonide is a low potency topical corticosteroid.	C1C(C=C2[C@](C=1)([C@]3([C@@](CC2)([C@]4([C@](C[C@H]3O)([C@@]5([C@@](C4)(OC(O5)(C)C)[H])C(CO)=O)C)[H])[H])[H])C)=O	199	http://www.selleckchem.com/products/Desonide.html	Others
27	S1568	PD318088	E09	E	09	384-L1700-02	561.09	391210-00-7	free base	MEK	PD318088 is a non-ATP competitive allosteric MEK1/2 inhibitor, binds simultaneously with ATP in a region of the MEK1 active site that is adjacent to the ATP-binding site.	C1=C(C(=C(C(=C1C(NOCC(CO)O)=O)NC2=CC=C(C=C2F)I)F)F)Br	199	http://www.selleckchem.com/products/PD318088.html	MAPK
27	S1712	Deferasirox	E10	E	10	384-L1700-02	373.36	201530-41-8	free base	Others	Deferasirox(Exjade) is a rationally-designed oral iron chelator.	C1=CC(=CC=C1C(O)=O)N2C(=NC(=N2)C3=CC=CC=C3O)C4=CC=CC=C4O	200	http://www.selleckchem.com/products/Deferasirox(Exjade).html	Others
35	S1577	Tie2 kinase inhibitor	E11	E	11	384-L1700-02	439.53	948557-43-5	free base	Tie-2	Tie2 kinase inhibitor is an optimized compound of SB-203580, selective to Tie2 with IC50 of 0.25 μM, 200-fold more potent than p38.	C12=C(C=CC(=C1)C3=C(N=C(N3)C4=CC=C(C=C4)S(C)=O)C5=CC=NC=C5)C=C(C=C2)OC	79	http://www.selleckchem.com/products/Tie2-kinase-inhibitor.html	Protein Tyrosine Kinase
35	S1723	Indomethacin	E12	E	12	384-L1700-02	357.79	53-86-1	free base	Others	Indomethacin(Indocid, Indocin) is a non-steroidal anti-inflammatory compound commonly used to reduce fever, pain, stiffness, and swelling.	C1=C(C=C2C(=C1)N(C(=C2CC(O)=O)C)C(C3=CC=C(C=C3)Cl)=O)OC	201	http://www.selleckchem.com/products/Indomethacin(Indocid).html	Others
43	S1604	Olmesartan Medoxomil	E13	E	13	384-L1700-02	558.59	144689-63-4	free base	RAAS	Olmesartan medoxomil is a compound which is hydrolyzed to olmesartan that is a selective AT1 subtype angiotensin II receptor antagonist.	N1(CC2=CC=C(C=C2)C3=CC=CC=C3C4=NNN=N4)C(=NC(=C1C(OCC5OC(OC=5C)=O)=O)C(O)(C)C)CCC	159	http://www.selleckchem.com/products/olmesartan-medoxomil-Benicar.html	Endocrinology & Hormones
43	S1735	Mesna	E14	E	14	384-L1700-02	164.18	19767-45-4	free base	Others	Mesna(Uromitexan, Mesnex), a sulfhydryl compound that is used to reduce the incidence of hemorrhagic cystitis associated with certain chemotherapeutic agents.	SCCS([O-])(=O)=O.[Na+]	200	http://www.selleckchem.com/products/Mesna(Uromitexan).html	Others
51	S1613	Silodosin	E15	E	15	384-L1700-02	495.53	160970-54-7	free base	Adrenergic Receptor	Silodosin(Rapaflo) is an α1-adrenoceptor antagonist with high uroselectivity.	C1=CC=C(C(=C1)OCCN[C@H](C)CC2=CC3=C(C(=C2)C(N)=O)N(CC3)CCCO)OCC(F)(F)F	199	http://www.selleckchem.com/products/Silodosin(Rapaflo).html	Neuronal Signaling
51	S1744	Nicotinic Acid	E16	E	16	384-L1700-02	123.11	59-67-6	free base	Others	Nicotinic Acid is a water-soluble vitamin belonging to the vitamin B family.	C1=CN=CC(=C1)C(=O)O	203	http://www.selleckchem.com/products/Niacin(Nicotinic-acid).html	Others
59	S1625	Ethinyl Estradiol	E17	E	17	384-L1700-02	296.4	57-63-6	free base	Others	Ethynyl estradiol is an orally bio-active estrogen used in almost all modern formulations of combined oral contraceptive pills.	C1=C(C=C2C(=C1)[C@]3([C@@](CC2)([C@]4([C@](CC3)([C@@](CC4)(O)C#C)C)[H])[H])[H])O	199	http://www.selleckchem.com/products/Ethinyl-Estradiol.html	Others
59	S1763	Quetiapine Fumarate	E18	E	18	384-L1700-02	883.09	111974-72-2	fumarate	Dopamine Receptor	Quetiapine fumarate(Seroquel) is an atypical antipsychotic used in the treatment of schizophrenia, bipolar I mania, bipolar II depression, bipolar I depression.	OC(/C=C/C(O)=O)=O.C1(=CC=C2C(=C1)N=C(C3=C(S2)C=CC=C3)N4CCN(CC4)CCOCCO).C5=CC=C6C(=C5)N=C(C7=C(S6)C=CC=C7)N8CCN(CC8)CCOCCO	40	http://www.selleckchem.com/products/Quetiapine-fumarate(Seroquel).html	Neuronal Signaling
67	S1635	Erythromycin	E19	E	19	384-L1700-02	733.93	114-07-8	free base	Others	Erythromycin is a macrolide antibiotic that has an antimicrobial spectrum similar to or slightly wider than that of penicillin (IC50=1.5 μg/ml).	C1[C@H](C([C@@H]([C@@H](O)[C@@]([C@H](OC([C@@H]([C@H]([C@@H]([C@@H](O[C@@H]2[C@@H]([C@@H](CC(C)O2)N(C)C)O)[C@@]1(C)O)C)O[C@@H]3C[C@]([C@@H]([C@H](O3)C)O)(OC)C)C)=O)CC)(O)C)C)=O)C	200	http://www.selleckchem.com/products/Erythromycin(E-Mycin).html	Others
67	S1777	Ethionamide	E20	E	20	384-L1700-02	166.24	536-33-4	free base	Others	Ethionamide(2-ethylthioisonicotinamide) is an antibiotic used in the treatment of tuberculosis.	C1=CN=C(C=C1C(=S)N)CC	198	http://www.selleckchem.com/products/Ethionamide.html	Others
75	S1645	Ketoprofen	E21	E	21	384-L1700-02	254.28	22071-15-4	free base	COX	Ketoprofen (Actron) is a non-selective NSAID with IC50 of 0.5 μM and 2.33 μM for human recombinant COX-1 and COX-2, respectively.	C1=CC=CC(=C1)C(C2=CC=CC(=C2)C(C(O)=O)C)=O	200	http://www.selleckchem.com/products/Ketoprofen(Actron).html	Neuronal Signaling
75	S1794	Fenofibrate	E22	E	22	384-L1700-02	360.83	49562-28-9	free base	Others	Fenofibrate (Tricor, Trilipix) is a compound of the fibrate class and fibric acid derivative.	C1=C(C=CC(=C1)C(C2=CC=C(C=C2)OC(C(OC(C)C)=O)(C)C)=O)Cl	199	http://www.selleckchem.com/products/Fenofibrate(Tricor).html	Others
3	S1832	Atracurium Besylate	F03	F	03	384-L1700-02	1243.48	64228-81-5	besylate	Others	Atracurium Besylate is a neuromuscular blocking agent with ED95 of 0.2 mg/kg.	C1(=C(C=C2C(=C1)CC[N+](C2CC3=CC=C(C(=C3)OC)OC)(CCC(OCCCCCOC(CC[N+]4(C(C5=CC(=C(C=C5CC4)OC)OC)CC6=CC=C(C(=C6)OC)OC)C)=O)=O)C)OC)OC.C7(=CC=CC=C7S([O-])(=O)=O).C8=CC=CC=C8S([O-])(=O)=O	10	http://www.selleckchem.com/products/atracurium-besylate.html	Others
3	S2015	Suplatast Tosylate	F04	F	04	384-L1700-02	499.64	94055-76-2	tosylate	Others	Suplatast Tosilate is a novel capsular anti-asthmatic agent that suppresses both IgE production, IL-4 and IL-5 synthesis with IC50 above 100 μM.	C1(=CC(=CC=C1NC(CC[S+](C)C)=O)OCC(O)COCC).C2=CC(=CC=C2S(=O)(=O)[O-])C	200	http://www.selleckchem.com/products/suplatast-tosilate.html	Others
11	S1847	Clemastine Fumarate	F05	F	05	384-L1700-02	459.96	14976-57-9	free base	Histamine Receptor	Clemastine Fumarate (Clemastine) is a selective histamine H1 receptor antagonist with IC50 of 3 nM.	C1(=C(C=CC(=C1)Cl)[C@](OCC[C@@H]2N(CCC2)C)(C3=CC=CC=C3)C).OC(/C=C/C(O)=O)=O	76	http://www.selleckchem.com/products/Clemastine-Fumarate.html	Neuronal Signaling
11	S2028	Diclazuril	F06	F	06	384-L1700-02	407.64	101831-37-2	free base	Others	Diclazuril is an anti-coccidial drug.	C1=C(C=CC(=C1)C(C2=C(Cl)C=C(C=C2Cl)N3N=CC(NC3=O)=O)C#N)Cl	39	http://www.selleckchem.com/products/diclazuril.html	Others
19	S1866	Diphenhydramine HCl	F07	F	07	384-L1700-02	291.82	147-24-0	hydrochloride	Others	Diphenhydramine HCl (Benadryl), a histamine H1 antagonist used as an antiemetic, antitussive, for dermatoses and pruritus, for hypersensitivity reactions, as a hypnotic, an antiparkinson, and as an ingredient in common cold preparations.	C1(=CC(=CC=C1)C(C2=CC=CC=C2)OCCN(C)C).Cl	198	http://www.selleckchem.com/products/Diphenhydramine-hydrochloride(Benadryl).html	Others
19	S2038	Phentolamine Mesylate	F08	F	08	384-L1700-02	377.46	65-28-1	mesylate	Adrenergic Receptor	Phentolamine Mesylate is a nonselective alpha-adrenergic antagonist with IC50 of 0.1 μM.	C1(N(C2=CC=C(C=C2)C)CC3NCCN=3)(=CC(=CC=C1)O).CS(O)(=O)=O	201	http://www.selleckchem.com/products/phentolamine-mesilate.html	Neuronal Signaling
27	S1885	Felodipine	F09	F	09	384-L1700-02	384.25	72509-76-3	free base	Calcium Channel	Felodipine is a selective L-type Ca2+ channel blocker with IC50 of 0.15 nM.	C1(=C(NC(=C(C1C2=CC=CC(=C2Cl)Cl)C(OC)=O)C)C)C(OCC)=O	200	http://www.selleckchem.com/products/Felodipine(Plendil).html	Transmembrane Transporters
27	S2047	Lornoxicam	F10	F	10	384-L1700-02	371.82	70374-39-9	free base	COX	Lornoxicam is a COX-1 and COX-2 inhibitor with IC50 of 5 nM and 8 nM, respectively.	N(C1=NC=CC=C1)C(C2N(S(C3=C(C=2O)SC(=C3)Cl)(=O)=O)C)=O	10	http://www.selleckchem.com/products/lornoxicam-xefo.html	Neuronal Signaling
35	S1897	Potassium Iodide	F11	F	11	384-L1700-02	166	7681-11-0	Inorganic salt	Others	Potassium iodide is used to treat overactive thyroid and to protect the thyroid gland from the effects of radiation from inhaled or swallowed radioactive iodine.	[K+].[I-]	198	http://www.selleckchem.com/products/Potassium-iodide.html	Others
35	S2061	Lovastatin	F12	F	12	384-L1700-02	404.54	75330-75-5	free base	HMG-CoA Reductase	Lovastatin is an inhibitor of HMG-CoA reductase with IC50 of 3.4 nM, used for lowering cholesterol (hypolipidemic agent).	C1[C@H](C=C2[C@]([C@@H]1OC(=O)[C@H](CC)C)([C@@H]([C@H](C=C2)C)CC[C@H]3OC(C[C@@H](C3)O)=O)[H])C	19	http://www.selleckchem.com/products/lovastatin-mevacor.html	Metabolism
43	S1908	Flutamide	F13	F	13	384-L1700-02	276.21	13311-84-7	free base	Androgen Receptor	Flutamide is an antiandrogen drug, with its active metablolite binding at androgen receptor with Ki values of 55 nM, and primarily used to treat prostate cancer. Phase 4.	C1(=C(C=C(C=C1)NC(C(C)C)=O)C(F)(F)F)[N+](=O)[O-]	199	http://www.selleckchem.com/products/Flutamide(Eulexin).html	Endocrinology & Hormones
43	S2077	Atorvastatin Calcium	F14	F	14	384-L1700-02	1155.34	134523-03-8	calcium	HMG-CoA Reductase	Atorvastatin (Lipitor) is an inhibitor of HMG-CoA reductase used as a cholesterol-lowering medication that blocks the production of cholesterol.	[Ca+2].N1(CC[C@H](C[C@H](CC([O-])=O)O)O)(C(=C(C(=C1C2=CC=C(C=C2)F)C3=CC=CC=C3)C(=O)NC4=CC=CC=C4)C(C)C).N5(CC[C@H](C[C@H](CC([O-])=O)O)O)C(=C(C(=C5C6=CC=C(C=C6)F)C7=CC=CC=C7)C(=O)NC8=CC=CC=C8)C(C)C	86	http://www.selleckchem.com/products/atorvastatin-calcium-lipitor.html	Metabolism
51	S1920	Haloperidol	F15	F	15	384-L1700-02	375.86	52-86-8	free base	Others	Haloperidol (Haldol) is an antipsychotic and butyrophenone.	C1(=CC=C(C=C1)C(=O)CCCN2CCC(CC2)(C3=CC=C(C=C3)Cl)O)F	199	http://www.selleckchem.com/products/Haloperidol(Haldol).html	Others
51	S2086	Ivabradine HCl	F16	F	16	384-L1700-02	505.05	148849-67-6	hydrochloride	Adrenergic Receptor	Ivabradine HCl, a new If inhibitor with IC 50 of 2.9 μM which acts specifically on the pacemaker activity of the sinoatrial node, is a pure heart rate lowering agent.	C1(=C2C(=CC(=C1OC)OC)[C@@H](C2)CN(CCCN3CCC4=C(CC3=O)C=C(C(=C4)OC)OC)C).Cl	199	http://www.selleckchem.com/products/ivabradine-hcl-procoralan.html	Neuronal Signaling
59	S1941	Enalapril Maleate	F17	F	17	384-L1700-02	492.52	76095-16-4	maleate	RAAS	Enalapril Maleate, the active metabolite of enalapril, competes with angiotensin I for binding at the angiotensin-converting enzyme, blocking the conversion of angiotensin I to angiotensin II.	C1(=CC=CC(=C1)CC[C@H](N[C@H](C(N2[C@@H](CCC2)C(O)=O)=O)C)C(OCC)=O).C(O)(\C=C/C(=O)O)=O	201	http://www.selleckchem.com/products/Enalapril-maleate(Vasotec).html	Endocrinology & Hormones
59	S2101	Gabexate Mesylate	F18	F	18	384-L1700-02	417.48	56974-61-9	mesylate	Proteasome	Gabexate is a serine protease inhibitor with IC50 of 0.19 μM which is used therapeutically in the treatment of pancreatitis and disseminated intravascular coagulation.	C1(=CC=C(C=C1)C(OCC)=O)OC(=O)CCCCCNC(N)=N.O=S(=O)(O)C	198	http://www.selleckchem.com/products/gabexate-mesylate.html	Proteases
67	S1962	Sulphadimethoxine	F19	F	19	384-L1700-02	310.33	122-11-2	free base	Others	Sulphadimethoxine is a non-reducing glucuronide.	N(C1=NC(=NC(=C1)OC)OC)S(C2=CC=C(C=C2)N)(=O)=O	199	http://www.selleckchem.com/products/sulphadimethoxine.html	Others
67	S2116	Conivaptan HCl	F20	F	20	384-L1700-02	535.04	168626-94-6	hydrochloride	Others	Conivaptan is a non-peptide inhibitor of antidiuretic hormone (vasopressin receptor antagonist).	C(NC1=CC=C(C=C1)C(N2C3=C(C4=C(CC2)N=C(N4)C)C=CC=C3)=O)(C5=C(C=CC=C5)C6=CC=CC=C6)=O.Cl	199	http://www.selleckchem.com/products/conivaptan-hcl-vaprisol.html	Others
75	S1975	Aripiprazole	F21	F	21	384-L1700-02	448.39	129722-12-9	free base	5-HT Receptor	Aripiprazole is a human 5-HT1A receptor partial agonist with a Ki of 4.2 nM.	C1=C(C=C2C(=C1)CCC(N2)=O)OCCCCN3CCN(CC3)C4=C(C(=CC=C4)Cl)Cl	200	http://www.selleckchem.com/products/aripiprazole-abilify.html	Neuronal Signaling
75	S2126	Naftopidil	F22	F	22	384-L1700-02	392.49	57149-07-2	free base	Adrenergic Receptor	Naftopidil (Flivas) is a selective α1-adrenergic receptor antagonist or alpha blocker with a Ki of 58.3 nM.	C1(=C2C(=CC=C1)C=CC=C2)OCC(CN3CCN(CC3)C4=CC=CC=C4OC)O	201	http://www.selleckchem.com/products/Naftopidil(Flivas).html	Neuronal Signaling
4	S1530	BIX 02188	G03	G	03	384-L1700-02	412.48	1094614-84-2	free base	MEK	BIX02188 is a selective inhibitor of MEK5 with IC50 of 4.3 nM, also inhibits ERK5 catalytic activity with IC50 of 810 nM, and does not inhibit closely related kinases MEK1, MEK2, ERK2, and JNK2.	C1=C(C=C2C(=C1)/C(C(N2)=O)=C(/NC3=CC(=CC=C3)CN(C)C)C4=CC=CC=C4)C(NC)=O	104	http://www.selleckchem.com/products/BIX-02188.html	MAPK
4	S1672	Aminoglutethimide	G04	G	04	384-L1700-02	232.28	125-84-8	free base	Aromatase	Aminoglutethimide is an aromatase inhibitor with IC50 of 10 μM.	C1(=CC=C(C=C1)N)C2(CCC(NC2=O)=O)CC	86	http://www.selleckchem.com/products/Aminoglutethimide(Cytadren).html	Endocrinology & Hormones
12	S1540	Saxagliptin	G05	G	05	384-L1700-02	315.41	361442-04-8	free base	DPP-4	Saxagliptin is a selective and reversible DPP4 inhibitor with IC50 of 26 nM.	C1C2CC3(CC1CC(C2)(O)C3)[C@@H](C(N4[C@@H](C[C@]5([C@]4(C5)[H])[H])C#N)=O)N	199	http://www.selleckchem.com/products/Saxagliptin(Onglyza).html	Proteases
12	S1683	Ipratropium Bromide	G06	G	06	384-L1700-02	412.37	22254-24-6	bromide	Others	Ipratropium bromide is a muscarinic antagonist, bronchodilator, N-Isopropyl salt of atropine.	[Br-].C12CCC([N+]1(C)C(C)C)CC(C2)OC(C(C3=CC=CC=C3)CO)=O	201	http://www.selleckchem.com/products/Ipratropium-bromide.html	Others
20	S1555	AZD8055	G07	G	07	384-L1700-02	465.54	1009298-09-2	free base	mTOR	AZD8055 is a novel ATP-competitive mTOR inhibitor with IC50 of 0.8 nM with excellent selectivity (∼1,000-fold) against PI3K isoforms and ATM/DNA-PK. Phase 1.	C1(=C(C=CC(=C1)C2=NC3=C(C=C2)C(=NC(=N3)N4[C@H](COCC4)C)N5[C@H](COCC5)C)OC)CO	199	http://www.selleckchem.com/products/AZD8055.html	PI3K/Akt/mTOR
20	S1702	Didanosine	G08	G	08	384-L1700-02	236.23	69655-05-6	free base	Reverse Transcriptase	Didanosine(Videx, Videx EC) is a reverse transcriptase inhibitor with an IC50 of 0.49 μM.	[C@H]1(CC[C@@H](O1)N2C3=C(N=C2)C(NC=N3)=O)CO	198	http://www.selleckchem.com/products/Didanosine(Videx).html	Microbiology
28	S1569	Tazarotene	G09	G	09	384-L1700-02	351.46	118292-40-3	free base	Others	Tazarotene is a prescription topical retinoid sold as a cream or gel.	C1CC(C2=C(S1)C=CC(=C2)C#CC3=NC=C(C=C3)C(=O)OCC)(C)C	28	http://www.selleckchem.com/products/Tazarotene(Avage).html	Others
28	S1713	Piroxicam	G10	G	10	384-L1700-02	331.35	36322-90-4	free base	COX	Piroxicam (Feldene) is a non-selective COX inhibitor with an IC50 of 6 mM.	C1=CN=C(C=C1)NC(C2N(S(C3=C(C=2O)C=CC=C3)(=O)=O)C)=O	199	http://www.selleckchem.com/products/Piroxicam(Feldene).html	Neuronal Signaling
36	S1578	Candesartan	G11	G	11	384-L1700-02	440.45	139481-59-7	free base	RAAS	Candesartan is an angiotensin II receptor antagonist with IC50 of 0.26 nM.	C1(=CC=C(C=C1)C2=CC=CC=C2C3N=NNN=3)CN4C5=C(N=C4OCC)C=CC=C5C(O)=O	199	http://www.selleckchem.com/products/Candesartan(Atacand).html	Endocrinology & Hormones
36	S1725	Terbinafine	G12	G	12	384-L1700-02	291.43	91161-71-6	free base	Others	Terbinafine(Lamisil, Terbinex) is used to treat infections caused by a fungus. It works by killing the fungus or preventing its growth.	C1=CC=C2C(=C1)C(=CC=C2)CN(C)C/C=C/C#CC(C)(C)C	199	http://www.selleckchem.com/products/Terbinafine(Lamisil).html	Others
44	S1605	Cefdinir	G13	G	13	384-L1700-02	395.41	91832-40-5	free base	Others	Cefdinir(Omnicef) is a bacteriocidal antibiotic.	[C@]12(N(C(=C(CS1)C=C)C(O)=O)C([C@@]2([H])NC(/C(C3N=C(SC=3)N)=N\O)=O)=O)[H]	199	http://www.selleckchem.com/products/Cefdinir(Omnicef).html	Others
44	S1736	Methocarbamol	G14	G	14	384-L1700-02	241.24	532-03-6	free base	Others	Methocarbamol(Robaxin) is a central muscle relaxant used to treat skeletal muscle spasms.	C1=CC=CC(=C1OC)OCC(O)COC(N)=O	198	http://www.selleckchem.com/products/Methocarbamol(Robaxin).html	Others
52	S1614	Riluzole	G15	G	15	384-L1700-02	234.2	1744-22-5	free base	Sodium Channel	Riluzole is a drug used to treat amyotrophic lateral sclerosis.	C12=C(C=CC(=C1)OC(F)(F)F)N=C(S2)N	200	http://www.selleckchem.com/products/Riluzole(Rilutek).html	Transmembrane Transporters
52	S1747	Nimodipine	G16	G	16	384-L1700-02	418.44	66085-59-4	free base	Calcium Channel,Autophagy	Nimodipine(Nimotop) is a dihydropyridine derivative and an analogue of the calcium channel blocker nifedipine, with antihypertensive activity.Nimodipine decreases intracellular free Ca2+,Beclin-1 and autophagy.	C1(=C(C(C(=C(N1)C)C(OCCOC)=O)C2=CC=CC(=C2)[N+](=O)[O-])C(OC(C)C)=O)C	200	http://www.selleckchem.com/products/Nimodipine(Nimotop).html	Transmembrane Transporters
60	S1626	Naproxen	G17	G	17	384-L1700-02	252.24	26159-34-2	sodium	COX	Naproxen is a COX inhibitor for COX-1 and COX-2 with IC50 of 8.7 μM and 5.2 μM, respectively.	C1(=C(C=C2C(=C1)C=C(C=C2)[C@@H](C([O-])=O)C)OC).[Na+]	11	http://www.selleckchem.com/products/Naproxen-Sodium(Aleve).html	Neuronal Signaling
60	S1764	Rifampin	G18	G	18	384-L1700-02	822.94	13292-46-1	free base	Others	Rifampin is a bactericidal antibiotic agent of the rifamycin group.	C1(=C2C(=C3C(=C1O)C4=C(C(=C3O)C)O[C@@](C4=O)(O/C=C/[C@@H]([C@H]([C@H]([C@@H]([C@@H]([C@@H]([C@H]([C@H](/C=C/C=C(/C(N2)=O)C)C)O)C)O)C)OC(=O)C)C)OC)C)O)/C=N/N5CCN(CC5)C	200	http://www.selleckchem.com/products/Rifampin(Rifadin).html	Others
68	S1636	Amphotericin B	G19	G	19	384-L1700-02	924.08	1397-89-3	free base	Others	Amphotericin B is a polyene, antifungal antibiotic produced from a strain of Streptomyces nodosus. (IC50=0.028–0.290 μg/ml)	[C@@H]1([C@H](C)[C@@H]([C@H](/C=C/C=C/C=C/C=C/C=C/C=C/C=C/[C@@H](C[C@H]2[C@H]([C@H](C[C@](C[C@H](C[C@H]([C@@H](CC[C@H](C[C@H](CC(=O)O1)O)O)O)O)O)(O2)O)O)C(O)=O)O[C@H]3[C@H]([C@H]([C@@H]([C@H](O3)C)O)N)O)C)O)C	23	http://www.selleckchem.com/products/Amphotericin-B(Abelcet).html	Others
68	S1778	Trifluridine	G20	G	20	384-L1700-02	296.2	70-00-8	free base	Others	Trifluridine (Viroptic) is an anti-herpesvirus antiviral agent used primarily on the eye.	N1C(N(C=C(C1=O)C(F)(F)F)[C@H]2C[C@@H]([C@H](O2)CO)O)=O	199	http://www.selleckchem.com/products/Trifluridine(Viroptic).html	Others
76	S1646	Ketorolac	G21	G	21	384-L1700-02	376.4	74103-07-4	tromethamine	COX	Ketorolac (Ketorolac tromethamine) is a non-selective COX inhibitor of COX-1 and COX-2 with IC50 of 1.23 μM and 3.50 μM, respectively.	C1(=CC=C(C=C1)C(C2=CC=C3N2CCC3C(=O)O)=O).OCC(CO)(CO)N	199	http://www.selleckchem.com/products/Ketorolac-Tromethamine(Toradol	Neuronal Signaling
76	S1799	Ranolazine	G22	G	22	384-L1700-02	427.54	95635-55-5	free base	Others	Ranolazine(Ranexa) is an antianginal medication.	C1=CC=C(C(=C1C)NC(CN2CCN(CC2)CC(COC3=CC=CC=C3OC)O)=O)C	201	http://www.selleckchem.com/products/Ranolazine(Ranexa).html	Others
4	S1833	Butoconazole nitrate	H03	H	03	384-L1700-02	474.79	64872-77-1	nitrate	Others	Butoconazole nitrate is an anti-fungal agent for IL-2, TNFα, IFN and GM-CSF with IC50 of 7.2 μg/mL, 14.4 μg/mL, 7.36 μg/mL and 7.6 μg/mL, respectively.	C1(=CC=C(C(=C1Cl)SC(CN2C=NC=C2)CCC3=CC=C(C=C3)Cl)Cl).[N+]([O-])(=O)O	200	http://www.selleckchem.com/products/butoconazole-nitrate.html	Others
4	S2016	Mirtazapine	H04	H	04	384-L1700-02	265.35	85650-52-8	free base	Others	Mirtazapine is a potent tetracyclic antidepressant.	C1C2=C(N3C(C4=C1C=CC=C4)CN(CC3)C)N=CC=C2	199	http://www.selleckchem.com/products/mirtazapine-remeron-avanza.html	Others
12	S1848	Curcumin	H05	H	05	384-L1700-02	368.38	458-37-7	free base	Others	Curcumin is the principal curcuminoid of the popular Indian spice turmeric, which is a member of the ginger family (Zingiberaceae).	C1(=C(C=CC(=C1)/C=C/C(/C=C(/C=C/C2=CC=C(C(=C2)OC)O)O)=O)O)OC	200	http://www.selleckchem.com/products/Curcumin.html	Others
12	S2029	Uridine	H06	H	06	384-L1700-02	244.2	58-96-8	free base	DNA/RNA Synthesis	Uridine is a nucleoside, contains a uracil attached to a ribose ring via a β-N1-glycosidic bond.	C1N(C(NC(C=1)=O)=O)[C@@H]2O[C@@H]([C@H]([C@@H]2O)O)CO	200	http://www.selleckchem.com/products/uridine.html	DNA Damage
20	S1869	Dapoxetine HCl	H07	H	07	384-L1700-02	341.87	129938-20-1	hydrochloride	5-HT Receptor	Dapoxetine hydrochloride is a short-acting novel selective serotonin reuptake inhibitor.	C1(=CC=C2C(=C1OCC[C@@H](C3=CC=CC=C3)N(C)C)C=CC=C2).Cl	198	http://www.selleckchem.com/products/Dapoxetine-hydrochloride(Priligy).html	Neuronal Signaling
20	S2040	Nimesulide	H08	H	08	384-L1700-02	308.31	51803-78-2	free base	COX	Nimesulide is a relatively COX-2 selective inhibitor with IC50 of 26 μM.	C1=CC(=CC(=C1NS(=O)(=O)C)OC2=CC=CC=C2)[N+](=O)[O-]	201	http://www.selleckchem.com/products/nimesulide.html	Neuronal Signaling
28	S1888	Deflazacort	H09	H	09	384-L1700-02	441.52	14484-47-0	free base	Others	Deflazacort(Calcort) is a glucocorticoid used as an anti-inflammatory and immunosuppressant.	C1C(C=C2[C@](C=1)([C@]3([C@@](CC2)([C@]4([C@](C[C@H]3O)([C@@]5([C@@](C4)(OC(=N5)C)[H])C(COC(C)=O)=O)C)[H])[H])[H])C)=O	199	http://www.selleckchem.com/products/Deflazacor.html	Others
28	S2051	Captopril	H10	H	10	384-L1700-02	217.29	62571-86-2	free base	RAAS	Captopril is an angiotensin-converting enzyme (ACE) inhibitor with IC50 of 6 nM.	C([C@@H]1N(CCC1)C([C@@H](CS)C)=O)(=O)O	197	http://www.selleckchem.com/products/captopril-capoten.html	Endocrinology & Hormones
36	S1898	Tropisetron	H11	H	11	384-L1700-02	320.81	105826-92-4	hydrochloride	5-HT Receptor	Tropisetron is a selective 5-HT3 receptor antagonist and α7-nicotinic receptor agonist with an IC50 of 70.1 ± 0.9 nM for 5-HT3 receptor.	C1(=CC=C2C(=C1)C(C=N2)C(OC3C[C@@]4(CC[C@@](N4C)(C3)[H])[H])=O).Cl	109	http://www.selleckchem.com/products/Tropisetron-hydrochloride.html	Neuronal Signaling
36	S2062	Tiopronin	H12	H	12	384-L1700-02	163.19	1953-02-2	free base	Others	Tiopronin is a US Food and Drug Administration (FDA)-approved drug for the treatment of cystinuria by controlling the rate of cystine precipitation and excretion.	C(CNC(C(C)S)=O)(=O)O	196	http://www.selleckchem.com/products/tiopronin-thiola.html	Others
44	S1909	Fluvastatin Sodium	H13	H	13	384-L1700-02	433.45	93957-55-2	sodium	HMG-CoA Reductase	Fluvastatin Sodium inhibits HMG-CoA reductase activity with IC50 of 8 nM.	C12(=C(C=CC=C1)N(C(=C2C3=CC=C(C=C3)F)/C=C/[C@H](C[C@H](CC([O-])=O)O)O)C(C)C).[Na+]	200	http://www.selleckchem.com/products/Fluvastatin-Sodium(Lescol).htm	Metabolism
44	S2078	Famotidine	H14	H	14	384-L1700-02	337.45	76824-35-6	free base	Histamine Receptor	Famotidine is a histamine H2–receptor antagonist with IC50 of 0.6 mM, commonly used to treat heartburn, GERD, ulcers, and other digestive conditions.	NS(NC(CCSCC1=CSC(=N1)NC(N)=N)=N)(=O)=O	198	http://www.selleckchem.com/products/famotidine-pepcid.html	Neuronal Signaling
52	S1921	Phenindione	H15	H	15	384-L1700-02	222.24	83-12-5	free base	Others	Phenindione is an anticoagulant which functions as a Vitamin K antagonist.	C1=CC=C2C(=C1)C(C(C2=O)C3=CC=CC=C3)=O	197	http://www.selleckchem.com/products/Phenindione(Rectadione).html	Others
52	S2087	Rivastigmine Tartrate	H16	H	16	384-L1700-02	400.42	129101-54-8	tartrate	AChR	Rivastigmine Tartrate, a cholinesterase inhibitor with IC50 of 5.5 μM, ues as a parasympathomimetic or cholinergic agent for the treatment of mild to moderate Alzheimer disease.	C1(=CC=CC(=C1)[C@@H](N(C)C)C)OC(N(C)CC)=O.OC([C@@H]([C@H](C(O)=O)O)O)=O	104	http://www.selleckchem.com/products/rivastigmine-tartrate-exelon.html	Neuronal Signaling
60	S1949	Menadione	H17	H	17	384-L1700-02	172.18	58-27-5	free base	Others	Menadione, a synthetic naphthoquinone without the isoprenoid side chain and biological activity, but can be converted to active vitamin K2, menaquinone, after alkylation in vivo.	C1=CC=C2C(=C1)C(C(=CC2=O)C)=O	197	http://www.selleckchem.com/products/Menadione.html	Others
60	S2102	Rasagiline Mesylate	H18	H	18	384-L1700-02	267.34	161735-79-1	mesylate	MAO	Rasagiline Mesylate is a new MAO-B inhibitor for the treatment of idiopathic Parkinson's disease.	C1(=CC=C2C(=C1)[C@H](CC2)NCC#C).O=S(=O)(C)O	198	http://www.selleckchem.com/products/rasagiline-mesylate.html	Metabolism
68	S1964	Rimantadine	H19	H	19	384-L1700-02	179.3	13392-28-4	free base	Others	Rimantadine (Flumadine) is an anti-influenza virus drug for T. brucei with IC50 of 7 μM.	C1C2CC3CC1(CC(C2)C3)C(N)C	184	http://www.selleckchem.com/products/rimantadine-flumadine.html	Others
68	S2118	Ibutilide Fumarate	H20	H	20	384-L1700-02	885.23	122647-32-9	fumarate	Sodium Channel	Ibutilide Fumarate is a Class III antiarrhythmic agent that is indicated for acute cardioconversion of atrial fibrillation and atrial flutter of a recent onset to sinus rhythm by induction of slow inward sodium current, which prolongs action potential and refractory period of myocardial cells.	CS(=O)(=O)NC1(C=CC(=CC=1)C(CCCN(CCCCCCC)CC)O).C(/C=C/C(=O)O)(=O)O.CS(=O)(=O)NC2C=CC(=CC=2)C(CCCN(CCCCCCC)CC)O	100	http://www.selleckchem.com/products/ibutilide-fumarate.html	Transmembrane Transporters
76	S1978	Methscopolamine	H21	H	21	384-L1700-02	398.29	155-41-9	bromide	AChR	Methscopolamine (Pamine) is a muscarinic acetylcholine receptor blocker.	[Br-].[C@]12([C@@]3([C@]([C@@]([N+]1(C)C)(C[C@H](C2)OC([C@@H](C4=CC=CC=C4)CO)=O)[H])(O3)[H])[H])[H]	200	http://www.selleckchem.com/products/Methscopolamine-bromide(Pamine).html	Neuronal Signaling
76	S2127	S- (+)-Rolipram	H22	H	22	384-L1700-02	275.34	85416-73-5	free base	PDE	S-(+)-Rolipram inhibits human monocyte cyclic AMP-specific PDE4 with IC50 of 0.75 μM, has anti-inflammatory and anti-depressant activity in the central nervous system, less potent than its R enantiomer.	C1(=C(C=C(C=C1)[C@H]2CNC(C2)=O)OC3CCCC3)OC	199	http://www.selleckchem.com/products/sRolipram.html	Metabolism
5	S1531	BIX 02189	I03	I	03	384-L1700-02	440.54	1094614-85-3	free base	MEK	BIX02189 is a selective inhibitor of MEK5 with IC50 of 1.5 nM, also inhibits ERK5 catalytic activity with IC50 of 810 nM, and does not inhibit closely related kinases MEK1, MEK2, ERK2, and JNK2.	C1=C(C=C2C(=C1)/C(C(N2)=O)=C(/NC3=CC(=CC=C3)CN(C)C)C4=CC=CC=C4)C(N(C)C)=O	199	http://www.selleckchem.com/products/BIX-02189.html	MAPK
5	S1673	Aminophylline	I04	I	04	384-L1700-02	420.43	317-34-0	ethylenediamine	PDE	Aminophylline is a competitive nonselective phosphodiesterase inhibitor with an IC50 of 0.12 mM and also a nonselective adenosine receptor antagonist.	NCCN.N1(C(N(C2=C(C1=O)NC=N2)C)=O)C.N3(C(N(C4=C(C3=O)NC=N4)C)=O)C	126	http://www.selleckchem.com/products/Aminophylline(Truphylline).html	Metabolism
13	S1541	EX 527 (Selisistat)	I05	I	05	384-L1700-02	248.71	49843-98-3	free base	Sirtuin	EX 527 is a potent and selective SIRT1 inhibitor with IC50 of 38 nM, exhibits >200-fold selectivity against SIRT2 and SIRT3.	N1C2=C(C3=C1C=CC(=C3)Cl)CCCC2C(=O)N	201	http://www.selleckchem.com/products/EX-527.html	Epigenetics
13	S1685	Sulfanilamide	I06	I	06	384-L1700-02	172.2	63-74-1	free base	Others	Sulfanilamide (Sulphanilamide) is a competitive inhibitor for bacterial enzyme dihydropteroate synthetase with IC50 of 320 μM.	C1(=CC=C(C=C1)S(N)(=O)=O)N	197	http://www.selleckchem.com/products/Sulfanilamide.html	Others
21	S1556	PHT-427	I07	I	07	384-L1700-02	409.61	1191951-57-1	free base	PDK-1,Akt	PHT-427 is a dual Akt and PDPK1 inhibitor (high affinity binding for the PH domains of Akt and PDPK1) with Ki of 2.7 μM and 5.2 μM, respectively.	C1=C(C=CC(=C1)S(=O)(NC2=NN=CS2)=O)CCCCCCCCCCCC	200	http://www.selleckchem.com/products/PHT-427.html	PI3K/Akt/mTOR
21	S1703	Divalproex Sodium	I08	I	08	384-L1700-02	310.41	76584-70-8	sodium	Autophagy	Divalproex sodium consists of a compound of sodium valproate and valproic acid in a 1:1 molar relationship in an enteric coated form.	C(C([O-])=O)(CCC)CCC.[Na+].C(C(CCC)CCC)(=O)O	199	http://www.selleckchem.com/products/Divalproex-sodium.html	Ubiquitin
29	S1570	KU-60019	I09	I	09	384-L1700-02	547.67	925701-49-1	free base	ATM/ATR	KU-60019 is an improved analogue of KU-55933, with IC50 of 6.3 nM for ATM, 270- and 1600-fold more selective for ATM than DNA-PK and ATR,and is a highly effective radiosensitizer.	C1=C(C=CC2=C1CC3=C(S2)C(=CC=C3)C4=CC(C=C(O4)N5CCOCC5)=O)NC(CN6C[C@@H](O[C@@H](C6)C)C)=O	73	http://www.selleckchem.com/products/KU-60019.html	DNA Damage
29	S1714	Gemcitabine	I10	I	10	384-L1700-02	263.2	95058-81-4	free base	Autophagy,DNA/RNA Synthesis	Gemcitabine(Gemzar) belongs to the group of medicines called antimetabolites.Phase 3.	N1=C(C=CN(C1=O)[C@@H]2O[C@@H]([C@H](C2(F)F)O)CO)N	56	http://www.selleckchem.com/products/Gemcitabine(Gemzar).html	DNA Damage
37	S1582	H 89 2HCl	I11	I	11	384-L1700-02	519.28	130964-39-5	2HCl	PKA	H 89 2HCl is a potent PKA inhibitor with Ki of 48 nM, 10-fold selective for PKA than PKG, greater than 500-fold selectivity than PKC, MLCK, calmodulin kinase II and casein kinase I/II.	C1(=CC=C(C2=C1C=NC=C2)S(NCCNC/C=C/C3=CC=C(C=C3)Br)(=O)=O).Cl.Cl	200	http://www.selleckchem.com/products/H-89-dihydrochloride.html	PI3K/Akt/mTOR
37	S1727	Levonorgestrel	I12	I	12	384-L1700-02	312.45	797-63-7	free base	Others	Levonorgestrel(Levonelle) is a synthetic progestogen used as an active ingredient in some hormonal contraceptives.	C1C(C=C2[C@](C1)([C@]3([C@@](CC2)([C@]4([C@](CC3)([C@@](CC4)(O)C#C)CC)[H])[H])[H])[H])=O	144	http://www.selleckchem.com/products/Levonorgestrel(Levonelle).html	Others
45	S1606	Clotrimazole	I13	I	13	384-L1700-02	344.84	23593-75-1	free base	Others	Clotrimazole is a synthetic, antifungal and broad-spectrum derivate of imidazole.	C1=CC=CC(=C1)C(C2=C(C=CC=C2)Cl)(C3=CC=CC=C3)N4C=NC=C4	31	http://www.selleckchem.com/products/Clotrimazole(Canesten).html	Others
45	S1737	Prednisolone	I14	I	14	384-L1700-02	360.44	50-24-8	free base	Others	Prednisolone(Hydroretrocortine) is a synthetic glucocorticoid with anti-inflammatory and immunomodulating properties.	C1C(C=C2[C@](C=1)([C@]3([C@@](CC2)([C@]4([C@](C[C@H]3O)([C@@](CC4)(C(=O)CO)O)C)[H])[H])[H])C)=O	199	http://www.selleckchem.com/products/Prednisolone(Hydroretrocortine).html	Others
53	S1615	Risperidone	I15	I	15	384-L1700-02	410.48	106266-06-2	free base	5-HT Receptor	Risperidone(Risperdal) is an atypical antipsychotic used to treat schizophrenia.	C1(=C(C(N2C(=N1)CCCC2)=O)CCN3CCC(CC3)C4C5=C(ON=4)C=C(C=C5)F)C	10	http://www.selleckchem.com/products/Risperidone(Risperdal).html	Neuronal Signaling
53	S1748	Nisoldipine	I16	I	16	384-L1700-02	388.41	63675-72-9	free base	Others	Nisoldipine (Sular) is a calcium channel blocker belonging to the dihydropyridines class, specific for L-type Cav1.2 with IC50 of 10 nM.	C1(=C(C(C(=C(N1)C)C(OC)=O)C2=CC=CC=C2[N+](=O)[O-])C(OCC(C)C)=O)C	200	http://www.selleckchem.com/products/Nisoldipine(Sular).html	Others
61	S1627	Nitazoxanide	I17	I	17	384-L1700-02	307.28	55981-09-4	free base	Others	Nitazoxanide is a synthetic nitrothiazolyl-salicylamide derivative and an antiprotozoal agent. (IC50 for canine influenza virus ranges from 0.17 to 0.21 μM)	C1=CC=CC(=C1OC(C)=O)C(NC2=NC=C(S2)[N+](=O)[O-])=O	201	http://www.selleckchem.com/products/Nitazoxanide(Alinia).html	Others
61	S1767	Beta Carotene	I18	I	18	384-L1700-02	536.87	7235-40-7	free base	Others	Beta Carotene is an organic compound and classified as a terpenoid. It is a precursor (inactive form) of vitamin A.	C1CCC(C(=C1C)/C=C/C(=C/C=C/C(=C/C=C/C=C(/C=C/C=C(/C=C/C2=C(CCCC2(C)C)C)C)C)C)C)(C)C	10	http://www.selleckchem.com/products/Beta-Carotene.html	Others
69	S1638	Ibuprofen	I19	I	19	384-L1700-02	206.28	15687-27-1	free base	COX	Ibuprofen (Dolgesic) is an anti-inflammatory inhibitor targeting COX-1 and COX-2 with IC50 of 13 μM and 370 μM, respectively.	C1=C(C=CC(=C1)C(C(O)=O)C)CC(C)C	198	http://www.selleckchem.com/products/Ibuprofen(Advil).html	Neuronal Signaling
69	S1782	Azacitidine	I20	I	20	384-L1700-02	244.2	320-67-2	free base	DNA Methyltransferase	Azacitidine is a nucleoside analogue of cytidine that specifically inhibits DNA methylation by trapping DNA methyltransferases.	[C@H]1([C@H](O[C@H]([C@H]1O)N2C(N=C(N=C2)N)=O)CO)O	200	http://www.selleckchem.com/products/Azacitidine(Vidaza).html	DNA Damage
77	S1647	Adenosine	I21	I	21	384-L1700-02	267.24	58-61-7	free base	Others	Adenosine is a nucleoside composed of a molecule of adenine attached to a ribose sugar molecule (ribofuranose) moiety via a β-N9-glycosidic bond.	O1[C@@H]([C@H]([C@H]([C@H]1N2C3=C(N=C2)C(=NC=N3)N)O)O)CO	44	http://www.selleckchem.com/products/Adenosine(Adenocard).html	Others
77	S1801	Ranitidine	I22	I	22	384-L1700-02	350.86	66357-59-3	hydrochloride	Histamine Receptor	Ranitidine is a histamine H2-receptor antagonist with IC50 of 3.3 ± 1.4 μM.	N(CC1=CC=C(O1)CSCCN/C(=C/[N+](=O)[O-])NC)(C)C.Cl	199	http://www.selleckchem.com/products/Ranitidine-hydrochloride(Zantac).html	Neuronal Signaling
5	S1835	Azithromycin	J03	J	03	384-L1700-02	748.98	83905-01-5	free base	Autophagy	Azithromycin is an antibiotic for inhibition of parasite growth with IC50 of 8.4 μM.	[C@@H]1([C@@]([C@H](OC([C@H]([C@H]([C@@H]([C@H]([C@](C[C@H](CN([C@@H]1C)C)C)(C)O)O[C@@H]2O[C@@H](C[C@@H]([C@@H]2O)N(C)C)C)C)O[C@H]3C[C@@]([C@H]([C@@H](O3)C)O)(C)OC)C)=O)CC)(O)C)O	133	http://www.selleckchem.com/products/azithromycin-zithromax.html	Ubiquitin
5	S2017	Benidipine HCl	J04	J	04	384-L1700-02	542.02	91599-74-5	hydrochloride	Calcium Channel	Benidipine HCl is a hydrochloride salt form of benidipine which is a dihydropyridine calcium channel blocker.	C1([C@H]2C(=C(NC(=C2C(OC)=O)C)C)C(O[C@@H]3CCCN(C3)CC4=CC=CC=C4)=O)(=CC(=CC=C1)[N+](=O)[O-]).Cl	14	http://www.selleckchem.com/products/benidipine-hydrochloride.html	Transmembrane Transporters
13	S1849	Daidzein	J05	J	05	384-L1700-02	254.24	486-66-8	free base	Others	Daidzein belongs to the group of isoflavones.	C1=C(C=C2C(=C1)C(C(=CO2)C3=CC=C(C=C3)O)=O)O	200	http://www.selleckchem.com/products/Daidzein.html	Others
13	S2030	Flunarizine 2HCl	J06	J	06	384-L1700-02	477.42	30484-77-6	2HCl	Calcium Channel	Flunarizine dihydrochloride is a dihydrochloride salt form which is a calcium channel blocker with a Ki of 68 nM.	C1(=CC=C(C=C1)C(N2CCN(CC2)C/C=C/C3=CC=CC=C3)C4=CC=C(C=C4)F)F.Cl.Cl	10	http://www.selleckchem.com/products/flunarizine-dihydrochloride.html	Transmembrane Transporters
21	S1876	Valaciclovir HCl	J07	J	07	384-L1700-02	360.8	124832-27-5	hydrochloride	Others	Valaciclovir hydrochloride is an antiviral drug used in the management of herpes simplex, herpes zoster, and herpes B.	N1(C(=O)C2=C(N=C1N)N(C=N2)COCCOC([C@H](C(C)C)N)=O).Cl	38	http://www.selleckchem.com/products/valaciclovir-hcl.html	Others
21	S2041	Dyclonine HCl	J08	J	08	384-L1700-02	325.87	536-43-6	hydrochloride	Others	Dyclonine hydrochloride is a hydrochloride salt form of dyclonine which is an oral anaesthetic.	C1(=C(C=CC(=C1)C(CCN2CCCCC2)=O)OCCCC).Cl	46	http://www.selleckchem.com/products/dyclonine-hydrochloride.html	Others
29	S1889	Mitoxantrone	J09	J	09	384-L1700-02	444.48	65271-80-9	Free Base	Topoisomerase	Mitoxantrone is a type II topoisomerase inhibitor with IC50 of 2.0 μM, 0.42 mM for HepG2 and MCF-7/wt cells, respectively	C1=CC(=C2C(=C1O)C(C3=C(C2=O)C(=CC=C3NCCNCCO)NCCNCCO)=O)O	89	www.selleckchem.com/products/Mitoxantrone.html	Cell Cycle
29	S2053	Cytidine	J10	J	10	384-L1700-02	243.22	65-46-3	free base	Others	Cytidine is a nucleoside molecule that is formed when cytosine is attached to a ribose ring, cytidine is a component of RNA.	C1(N(C=CC(=N1)N)[C@@H]2O[C@@H]([C@H]([C@@H]2O)O)CO)=O	201	http://www.selleckchem.com/products/cytidine.html	Others
37	S1899	Nicotinamide (Vitamin B3)	J11	J	11	384-L1700-02	122.12	98-92-0	free base	Others	Nicotinamide (Vitamin B3) is a water-soluble vitamin and is part of the vitamin B group.	C1=CN=CC(=C1)C(N)=O	196	http://www.selleckchem.com/products/Nicotinamide(Niacinamide).html	Others
37	S2064	Balofloxacin	J12	J	12	384-L1700-02	389.42	127294-70-6	free base	Others	Balofloxacin is quinolone antibiotic, inhibiting the synthesis of bacterial DNA by interference with the enqyme DNA gyrase.	N1(C2=C(C3=C(C=C2F)C(C(=CN3C4CC4)C(=O)O)=O)OC)CC(CCC1)NC	12	http://www.selleckchem.com/products/balofloxacin.html	Others
45	S1910	Tioconazole	J13	J	13	384-L1700-02	387.71	65899-73-2	free base	Others	Tioconazole is an antifungal medication with an average IC50 of 1.7 μM.	C1=C(C(=CC=C1Cl)C(OCC2C=CSC=2Cl)CN3C=CN=C3)Cl	201	http://www.selleckchem.com/products/tioconazole.html	Others
45	S2079	Moexipril HCl	J14	J	14	384-L1700-02	535.03	82586-52-5	hydrochloride	RAAS	Moexipril HCl is a potent orally active non-sulfhydryl angiotensin converting enzyme inhibitor (ACE) with IC50 of 0.041 μM, which is used for the treatment of hypertension and congestive heart failure.	C1(=C(C=C2C(=C1)C[C@H](N(C2)C(=O)[C@H](C)N[C@H](C(=O)OCC)CCC3=CC=CC=C3)C(O)=O)OC)OC.Cl	37	http://www.selleckchem.com/products/moexipril-hydrochloride.html	Endocrinology & Hormones
53	S1928	Alibendol	J15	J	15	384-L1700-02	251.28	26750-81-2	free base	Others	Alibendol is an antispasmodic,choleretic, and cholekinetic.	C1=C(C(=C(C=C1CC=C)C(=O)NCCO)O)OC	198	http://www.selleckchem.com/products/alibendol.html	Others
53	S2091	Betaxolol	J16	J	16	384-L1700-02	307.43	659-18-7	free base	Adrenergic Receptor	Betaxolol is a selective beta1 adrenergic receptor blocker used in the treatment of hypertension and glaucoma.	C1=CC(=CC=C1CCOCC2CC2)OCC(CNC(C)C)O	201	http://www.selleckchem.com/products/betaxolol-betoptic.html	Neuronal Signaling
61	S1952	Methoxsalen	J17	J	17	384-L1700-02	216.19	298-81-7	free base	Others	Methoxsalen (Oxsoralen) a naturally occurring furocoumarin compound found in several species of plants, including Psoralea corylifolia, is an agent used to treat psoriasis, eczema, vitiligo and some cutaneous Lymphomas in conjunction with exposing the skin to sunlight.	C1C(OC2=C(C=1)C=C3C(=C2OC)OC=C3)=O	198	http://www.selleckchem.com/products/Methoxsalen(Oxsoralen).html	Others
61	S2103	Naltrexone HCl	J18	J	18	384-L1700-02	377.86	16676-29-2	hydrochloride	Opioid Receptor	Naltrexone is an opioid receptor antagonist with IC50 of 8 nM used primarily in the management of alcohol dependence and opioid dependence.	C1(=C(C2=C3C(=C1)C[C@@H]4[C@]5([C@@]3([C@H](C(CC5)=O)O2)CCN4CC6CC6)O)O).Cl	37	http://www.selleckchem.com/products/naltrexone-hcl.html	Neuronal Signaling
69	S1965	Primidone	J19	J	19	384-L1700-02	218.25	125-33-7	free base	Others	Primidone(Mysoline) is an anticonvulsant of the pyrimidinedione class.	C1NC(C(C(N1)=O)(CC)C2=CC=CC=C2)=O	201	http://www.selleckchem.com/products/Primidone(Mysoline).html	Others
69	S2119	Probucol	J20	J	20	384-L1700-02	516.84	23288-49-5	free base	Others	Probucol is an anti-hyperlipidemic drug by lowering the level of cholesterol in the bloodstream by increasing the rate of LDL catabolism.	C1(=C(C(=CC(=C1)SC(SC2C=C(C(=C(C=2)C(C)(C)C)O)C(C)(C)C)(C)C)C(C)(C)C)O)C(C)(C)C	199	http://www.selleckchem.com/products/probucol.html	Others
77	S1979	Amiodarone HCl	J21	J	21	384-L1700-02	681.77	19774-82-4	hydrochloride	Autophagy,Potassium Channel	Amiodarone HCl is an antiarrhythmic drug for inhibition of ATP-sensitive potassium channel with IC50 of 19.1 μM.	C1(=C(C=C(C=C1I)C(=O)C2=C(OC3=C2C=CC=C3)CCCC)I)OCCN(CC)CC.Cl	33	http://www.selleckchem.com/products/amiodarone-hcl.html	Transmembrane Transporters
77	S2128	Bazedoxifene HCl	J22	J	22	384-L1700-02	507.06	198480-56-7	free base	Estrogen/progestogen Receptor	Bazedoxifene HCl is a novel, non-steroidal, indole-based estrogen receptor modulator (SERM) binding to both ERα and ERβ with IC50 of 23 nM and 89 nM.	C1(N(C2=CC=C(C=C(C=1C)2)O)CC3=CC=C(OCCN4CCCCCC4)C=C3)C5(=CC=C(O)C=C5).Cl	199	http://www.selleckchem.com/products/bazedoxifene-hcl.html	Endocrinology & Hormones
6	S1532	AZD7762	K03	K	03	384-L1700-02	362.42	860352-01-8	free base	Chk	AZD7762 is a potent and selective inhibitor of Chk1 with IC50 of 5 nM. It is equally potent against Chk2 and less potent against CAM, Yes, Fyn, Lyn, Hck and Lck. Phase 1.	C1(=CC=CC(=C1)C2SC(=C(C=2)NC(N)=O)C(N[C@@H]3CNCCC3)=O)F	137	http://www.selleckchem.com/products/AZD7762.html	Cell Cycle
6	S1675	Lubiprostone	K04	K	04	384-L1700-02	390.46	136790-76-6	free base	Others	Lubiprostone(Amitiza) is a gastrointestinal agent used for the treatment of idiopathic chronic constipation.	C1(C[C@H]([C@@H]([C@@H]1CCCCCCC(O)=O)CCC(C(CCCC)(F)F)=O)O)=O	199	http://www.selleckchem.com/products/Lubiprostone(Amitiza).html	Others
14	S1544	AM1241	K05	K	05	384-L1700-02	503.33	444912-48-5	free base	Cannabinoid Receptor	AM-1241 is a selective cannabinoid CB2 receptor agonist with Ki of 3.4 nM, exhibits 82-fold selectivity over CB1 receptor.	C1=CC2=C(C=C1)N(C=C2C(C3=CC(=CC=C3I)[N+](=O)[O-])=O)CC4N(CCCC4)C	200	http://www.selleckchem.com/products/AM-1241.html	GPCR & G Protein
14	S1689	Meprednisone	K06	K	06	384-L1700-02	372.455	1247-42-3	free base	Others	Meprednisone is a glucocorticoid and a methylated derivative of prednisone.	C1C(C=C2[C@](C=1)([C@]3([C@@](CC2)([C@]4([C@](CC3=O)([C@]([C@H](C4)C)(O)C(CO)=O)C)[H])[H])[H])C)=O	201	http://www.selleckchem.com/products/Betapar(Meprednisone).html	Others
22	S1557	KRN 633	K07	K	07	384-L1700-02	416.86	286370-15-8	free base	PDGFR,VEGFR	KRN 633 is an ATP-competitive inhibitor of VEGFR1/2/3 with IC50 of 170 nM/160 nM/125 nM, weakly inhibits PDGFR-α/β and c-Kit, does not block the phosphorylation of FGFR-1, EGFR or c-Met in cell.	C1(=C(C=C2C(=C1)C(=NC=N2)OC3=CC=C(C(=C3)Cl)NC(=O)NCCC)OC)OC	21	http://www.selleckchem.com/products/KRN-633.html	Protein Tyrosine Kinase
22	S1704	Emtricitabine	K08	K	08	384-L1700-02	247.25	143491-57-0	free base	Reverse Transcriptase	Emtricitabine (Emtriva) is a nucleoside reverse transcriptase inhibitor with an IC50 of 27.7 μM.	N1=C(C(=CN(C1=O)[C@H]2O[C@H](SC2)CO)F)N	198	http://www.selleckchem.com/products/Emtricitabine.html	Microbiology
30	S1572	BS-181 HCl	K09	K	09	384-L1700-02	416.99	1397219-81-6	hydrochloride	CDK	BS-181 is a highly selective CDK7 inhibitor with IC50 of 21 nM. It is more than 40-fold selective for CDK7 than CDK1, 2, 4, 5, 6, or 9.	C1(=CC(=NC2N1N=CC=2C(C)C)NCCCCCCN)NCC3(=CC=CC=C3).Cl	199	http://www.selleckchem.com/products/BS-181.html	Cell Cycle
30	S1715	Glipizide	K10	K	10	384-L1700-02	445.54	29094-61-9	free base	Others	Glipizide(Glucotrol) is used to treat high blood sugar levels caused by a type of diabetes mellitus called type 2 diabetes.	C1(=CC=C(C=C1)CCNC(C2=CN=C(C=N2)C)=O)S(NC(NC3CCCCC3)=O)(=O)=O	199	http://www.selleckchem.com/products/Glipizide(Glucotrol).html	Others
38	S1590	TWS119	K11	K	11	384-L1700-02	318.33	601514-19-6	free base	GSK-3	TWS119 is a GSK-3β inhibitor with IC50 of 30 nM; capable of inducing neuronal differentiation and may be useful to stem cell biology.	C1=CC=C(C=C1O)OC2=NC=NC3=C2C=C(N3)C4=CC=CC(=C4)N	201	http://www.selleckchem.com/products/TWS119.html	PI3K/Akt/mTOR
38	S1729	Gemfibrozil	K12	K	12	384-L1700-02	250.33	25812-30-0	free base	Others	Gemfibrozil (Lopid) is a compound used to lower lipid levels.	C1=CC(=CC(=C1C)OCCCC(C(=O)O)(C)C)C	199	http://www.selleckchem.com/products/Gemfibrozil(Lopid).html	Others
46	S1607	Rizatriptan Benzoate	K13	K	13	384-L1700-02	391.47	145202-66-0	benzoate	5-HT Receptor	Rizatriptan Benzoate(Maxalt) is a 5-HT1 agonist triptan drug for the treatment of migraine headaches.	C1(=CC(=CC2=C1NC=C2CCN(C)C)CN3C=NC=N3).C4=CC(=CC=C4)C(O)=O	51	http://www.selleckchem.com/products/Rizatriptan-Benzoate(Maxalt).html	Neuronal Signaling
46	S1738	Telmisartan	K14	K	14	384-L1700-02	514.62	144701-48-4	free base	RAAS	Telmisartan (Micardis) is an angiotensin II receptor antagonist (ARB) used in the management of hypertension.	C1=C(C(=CC=C1)C2=CC=C(C=C2)CN3C(=NC4=C3C=C(C=C4C)C5N(C6=C(N=5)C=CC=C6)C)CCC)C(O)=O	25	http://www.selleckchem.com/products/Telmisartan(Micardis).html	Endocrinology & Hormones
54	S1618	Sulfameter	K15	K	15	384-L1700-02	280.3	651-06-9	free base	Others	Sulfameter(Bayrena) is a long-acting sulfonamide antibacterial.	C1(=CC=C(C=C1)S(NC2=NC=C(C=N2)OC)(=O)=O)N	199	http://www.selleckchem.com/products/Sulfameter(Bayrena).html	Others
54	S1756	Enoxacin	K16	K	16	384-L1700-02	320.32	74011-58-8	free base	Others	Enoxacin(Penetrex)is an oral broad-spectrum fluoroquinolone antibacterial agent used in the treatment of urinary tract infections and gonorrhea. Insomnia is a common adverse effect.	C1(=C(N=C2C(=C1)C(C(=CN2CC)C(O)=O)=O)N3CCNCC3)F	10	http://www.selleckchem.com/products/Enoxacin(Penetrex).html	Others
62	S1628	Triamcinolone Acetonide	K17	K	17	384-L1700-02	434.5	76-25-5	free base	Others	Triamcinolone Acetonide is a more potent type of triamcinolone, being about 8 times as effective as prednisone.	C1C(C=C2[C@](C=1)([C@]3([C@@](CC2)([C@]4([C@](C[C@H]3O)([C@@]5([C@@H](C4)OC(O5)(C)C)C(CO)=O)C)[H])[H])F)C)=O	200	http://www.selleckchem.com/products/Triamcinolone-Acetonide.html	Others
62	S1768	Cefditoren Pivoxil	K18	K	18	384-L1700-02	620.72	117467-28-4	free base	Others	Cefditoren pivoxil is used to treat uncomplicated skin and skin structure infections, etc.	N12[C@](SCC(=C1C(=O)OCOC(C(C)(C)C)=O)\C=C/C3SC=NC=3C)([C@H](C2=O)NC(=O)/C(=N\OC)C4=CSC(=N4)N)[H]	199	http://www.selleckchem.com/products/Cefditoren-pivoxil.html	Others
70	S1639	Amprenavir	K19	K	19	384-L1700-02	505.63	161814-49-9	free base	HIV Protease	Amprenavir is an HIV protease inhibitor with IC50 of 14.6 ng/mL in wild-type HIV isolates.	C1=C(C=CC(=C1)S(N(C[C@H]([C@@H](NC(O[C@@H]2COCC2)=O)CC3=CC=CC=C3)O)CC(C)C)(=O)=O)N	31	http://www.selleckchem.com/products/Amprenavir-(Agenerase).html	Proteases
70	S1784	Vidarabine	K20	K	20	384-L1700-02	267.24	5536-17-4	free base	Others	Vidarabine(Vira-A) is an antiviral drug which is active against herpes simplex and varicella zoster viruses.	C1=NC(=C2C(=N1)N(C=N2)[C@H]3[C@H]([C@@H]([C@H](O3)CO)O)O)N	198	http://www.selleckchem.com/products/Vidarabine(Vira-A).html	Others
78	S1649	Zolmitriptan	K21	K	21	384-L1700-02	287.36	139264-17-8	free base	5-HT Receptor	Zolmitriptan(Zomig) is a selective serotonin receptor agonist.	C1=C(C=CC2=C1C(=CN2)CCN(C)C)C[C@@H]3NC(OC3)=O	201	http://www.selleckchem.com/products/Zolmitriptan(Zomig).html	Neuronal Signaling
78	S1802	Acadesine	K22	K	22	384-L1700-02	258.23	2627-69-2	free base	AMPK	Acadesine results in accumulation of ZMP, which mimics the stimulating effect of AMP on AMPK and AMPK kinase. Phase 3.	[C@@H]1([C@H]([C@@H](O[C@H]1CO)N2C=NC(=C2N)C(=O)N)O)O	10	http://www.selleckchem.com/products/Acadesine.html	PI3K/Akt/mTOR
6	S1836	Albendazole Oxide	L03	L	03	384-L1700-02	281.33	54029-12-8	free base	Others	Albendazole Oxide is a tubulin polymerization or assembly inhibitor.	C1(C=CC2=C(C=1)NC(=N2)NC(=O)OC)S(CCC)=O	39	http://www.selleckchem.com/products/albendazole-oxide-ricobendazole.html	Others
6	S2020	Formoterol Hemifumarate	L04	L	04	384-L1700-02	402.4	43229-80-7	fumarate	Adrenergic Receptor	Formoterol hemifumarate is a potent, selective and long-acting β2-adrenoceptor agonist to β2 and β1 receptors with pKd of 8.12 and 5.58, respectively.	OC(/C=C/C(O)=O)=O.C1(=C(C=CC(=C1)C[C@@H](NC[C@H](C2=CC=C(C(=C2)NC=O)O)O)C)OC).C3=C(C=CC(=C3)C[C@@H](NC[C@H](C4=CC=C(C(=C4)NC=O)O)O)C)OC	243	http://www.selleckchem.com/products/formoterol-hemifumarate.html	Neuronal Signaling
14	S1854	Bifonazole	L05	L	05	384-L1700-02	310.39	60628-96-8	free base	Others	Bifonazole is an antifungal agent and a prostatic aromatase activity inhibitor with IC50 of 1.6 μM.	C1=CC=CC(=C1)C(C2=CC=C(C=C2)C3=CC=CC=C3)N4C=NC=C4	199	http://www.selleckchem.com/products/bifonazole.html	Others
14	S2031	Fenticonazole Nitrate	L06	L	06	384-L1700-02	518.41	73151-29-8	nitrate	Others	Fenticonazole nitrate is an azole antifungal agent.	C(OCC1=CC=C(C=C1)SC2=CC=CC=C2)(C3=CC=C(C=C3Cl)Cl)CN4(C=CN=C4).[N+]([O-])(=O)O	200	http://www.selleckchem.com/products/fenticonazole-nitrate.html	Others
22	S1878	Ganciclovir	L07	L	07	384-L1700-02	255.23	82410-32-0	free base	Others	Ganciclovir is an antiviral drug for feline herpesvirus type-1 with IC50 of 5.2 μM.	N1C(=NC2=C(C1=O)N=CN2COC(CO)CO)N	195	http://www.selleckchem.com/products/ganciclovir.html	Others
22	S2042	Cyproterone Acetate	L08	L	08	384-L1700-02	416.94	427-51-0	acetate	Androgen Receptor	Cyproterone acetate is an androgen receptor (AR) antagonist with IC50 of 7.1 nM, as well as a weak progesterone receptor agonist with weak pro-gestational and glucocorticoid activity.	[C@H]12C(C=C3[C@]([C@@H]1C2)([C@]4([C@@](C=C3Cl)([C@]5([C@](CC4)([C@@](CC5)(C(=O)C)OC(C)=O)C)[H])[H])[H])C)=O	199	http://www.selleckchem.com/products/cyproterone-acetate.html	Endocrinology & Hormones
30	S1890	Nizatidine	L09	L	09	384-L1700-02	331.46	76963-41-2	free base	Histamine Receptor	Nizatidine is a histamine H2 receptor antagonist with IC50 of 6.7 nM for AChE.	S1C(=NC(=C1)CSCCN/C(=C\[N+](=O)[O-])NC)CN(C)C	199	http://www.selleckchem.com/products/Nizatidine(Axid).html	Neuronal Signaling
30	S2054	Orphenadrine Citrate	L10	L	10	384-L1700-02	461.5	4682-36-4	citrate	AChR	Orphenadrine citrate is a skeletal muscle relaxant, it acts in the central nervous system to produce its muscle relaxant effects.	C1(C(OCCN(C)C)C2=CC=CC=C2C)(=CC=CC=C1).OC(CC(CC(O)=O)(C(=O)O)O)=O	199	http://www.selleckchem.com/products/orphenadrine-citrate-norflex.html	Neuronal Signaling
38	S1902	Vitamin B12	L11	L	11	384-L1700-02	1355.37	68-19-9	free base	Others	Vitamin B12 is a water soluble vitamin with a key role in the normal functioning of the brain and nervous system, and for the formation of blood.	[C@H]1([C@](C2=N[C@@]1([C@]3([C@]([C@@H](/C([N-]3)=C(/C4[C@@]([C@@H](/C(N=4)=C/C5C([C@@H](/C(N=5)=C/2C)CCC(N)=O)(C)C)CCC(N)=O)(C)CC(N)=O)C)CCC(N)=O)(CC(N)=O)C)C)[H])(CCC(NC[C@H](OP(O[C@H]6[C@H]([C@H](O[C@H]6CO)N7C=NC8=C7C=C(C(=C8)C)C)O)([O-])=O)C)=O)C)CC(N)=O.[Co+2]C#N	55	http://www.selleckchem.com/products/Vitamin-B12.html	Others
38	S2065	Lafutidine	L12	L	12	384-L1700-02	431.55	118288-08-7	free base	Histamine Receptor	Lafutidine, a newly developed histamine H(2)-receptor antagonist, inhibits gastric acid secretion.	C1=C(N=CC=C1CN2CCCCC2)OC/C=C\CNC(CS(=O)CC3=CC=CO3)=O	199	http://www.selleckchem.com/products/lafutidine.html	Neuronal Signaling
46	S1913	Tropicamide	L13	L	13	384-L1700-02	284.35	1508-75-4	free base	AChR	Tropicamide is an anticholinergic and a muscarinic receptor subtype M4-preferring antagonist with IC50 of 8.0 nM.	C1=CC=CC(=C1)C(CO)C(=O)N(CC)CC2=CC=NC=C2	200	http://www.selleckchem.com/products/tropicamide.html	Neuronal Signaling
46	S2080	Clevidipine Butyrate	L14	L	14	384-L1700-02	456.32	167221-71-8	free base	Calcium Channel	Cleviprex (Clevidipine) is a dihydropyridine calcium channel blocker use as agent for the reduction of blood pressure.	CCCC(OCOC(C1=C(NC(=C(C1C2=CC=CC(=C2Cl)Cl)C(OC)=O)C)C)=O)=O	199	http://www.selleckchem.com/products/cleviprex-clevidipine.html	Transmembrane Transporters
54	S1929	Irsogladine	L15	L	15	384-L1700-02	256.09	57381-26-7	free base	PDE,AChR	Irsogladine is an anti-gastric ulcer agent that facilitates gap-junctional intercellular communication through M1 muscarininc acetylcholine receptor binding.	C1=CC(=C(C=C1Cl)C2=NC(=NC(=N2)N)N)Cl	10	http://www.selleckchem.com/products/Irsogladine-maleate.html	Metabolism
54	S2092	Detomidine HCl	L16	L	16	384-L1700-02	222.71	90038-01-0	hydrochloride	Adrenergic Receptor	Detomidine produce dose-dependent sedative and analgesic effects, mediatated by activation of α2 catecholamine receptors.	C1(=CC=CC(=C1C)C)CC2(N=CNC=2).Cl	202	http://www.selleckchem.com/products/detomidine-hcl.html	Neuronal Signaling
62	S1956	Miconazole Nitrate	L17	L	17	384-L1700-02	479.14	22832-87-7	nitrate	Others	Miconazole is an imidazole antifungal agent that is used topically and by intravenous infusion.	C1(=C(C=C(C(=C1)C(OCC2=CC=C(C=C2Cl)Cl)CN3C=CN=C3)Cl)Cl).O[N+](=O)[O-]	200	http://www.selleckchem.com/products/Miconazole-nitrate.html	Others
62	S2104	Levosulpiride	L18	L	18	384-L1700-02	341.43	23672-07-3	free base	Dopamine Receptor	Levosulpiride is a selective antagonist for D2 dopamine receptors used as an antipsychotic and prokinetic agent.	C1=CC(=C(C=C1S(=O)(N)=O)C(=O)NC[C@H]2N(CCC2)CC)OC	202	http://www.selleckchem.com/products/levosulpiride-levogastrol.html	Neuronal Signaling
70	S1969	Nefiracetam	L19	L	19	384-L1700-02	246.3	77191-36-7	free base	GABA Receptor	Nefiracetam is a GABAergic, cholinergic, and monoaminergic neuronal systems enhancer for Ro 5-4864-induced convulsions. Phase 2.	C(N1C(CCC1)=O)C(NC2=C(C=CC=C2C)C)=O	198	http://www.selleckchem.com/products/Nefiracetam(Translon).html	Neuronal Signaling
70	S2120	Arbidol HCl	L20	L	20	384-L1700-02	513.88	131707-23-8	hydrochloride	Others	Arbidol is an antiviral treatment for influenza infection.	C1(=C(C=C2C(=C1CN(C)C)C(=C(N2C)CSC3=CC=CC=C3)C(OCC)=O)Br)O.Cl	200	http://www.selleckchem.com/products/Arbidol-hcl.html	Others
78	S1983	Adenine HCl	L21	L	21	384-L1700-02	171.59	2922-28-3	hydrochloride	DNA/RNA Synthesis	Adenine hydrochloride is a hydrochloride salt form of adenine which is a purine derivative and a nucleobase with a variety of roles in biochemistry.	C12(=C(C(=NC=N1)N)N=CN2).Cl	46	http://www.selleckchem.com/products/adenine-hydrochloride.html	DNA Damage
78	S2130	Atropine	L22	L	22	384-L1700-02	694.83	5908-99-6	coordination co	AChR	Atropine sulfate monohydrate is a competitive muscarinic acetylcholine receptor antagonist with an IC50 of 2.5 nM.	OS(O)(=O)=O.O.C(C(C1=CC=CC=C1)CO)(O[C@H]2C[C@]3(CC[C@](N3C)(C2)[H])[H])=O.C(C(C4=CC=CC=C4)CO)(O[C@H]5C[C@]6(CC[C@](N6C)(C5)[H])[H])=O	200	http://www.selleckchem.com/products/Atropine-sulfate-monohydrate.html	Neuronal Signaling
7	S1533	R406 (free base)	M03	M	03	384-L1700-02	470.45	841290-80-0	free base	Syk	R406 (free base) is a potent Syk inhibitor with IC50 of 41 nM, strongly inhibits Syk but not Lyn, 5-fold less potent to Flt3. Phase 2.	C1(=C(C=C(C=C1OC)NC2=NC(=C(C=N2)F)NC3=NC4=C(C=C3)OC(C(N4)=O)(C)C)OC)OC	44	http://www.selleckchem.com/products/R406(free-base).html	Angiogenesis
7	S1676	Amorolfine HCl	M04	M	04	384-L1700-02	353.97	78613-38-4	hydrochloride	Others	Amorolfine hydrochloride is a antifungal reagent.	C1(=C(C=CC(=C1)CC(CN2C[C@@H](O[C@@H](C2)C)C)C)C(CC)(C)C).Cl	79	http://www.selleckchem.com/products/Amorolfine-Hydrochloride.html	Others
15	S1545	SB408124	M05	M	05	384-L1700-02	356.37	288150-92-5	free base	OX Receptor	SB408124 (Tocris-1963) is a non-peptide antagonist for OX1 receptor with Ki of 57 nM and27 nM in both whole cell and membrane, respectively, exhibits 50-fold selectivity over OX2 receptor.	C1=C(C=C2C(=C1F)N=C(C=C2NC(NC3=CC=C(C=C3)N(C)C)=O)C)F	101	http://www.selleckchem.com/products/SB-408124.html	GPCR & G Protein
15	S1691	Praziquantel	M06	M	06	384-L1700-02	312.41	55268-74-1	free base	Others	Praziquantel is an anthelmintic effective against flatworms.	C1=CC=C2C(=C1)C3N(CC2)C(CN(C3)C(C4CCCCC4)=O)=O	201	http://www.selleckchem.com/products/Praziquantel(Biltricide).html	Others
23	S1558	AT7867	M07	M	07	384-L1700-02	337.85	857531-00-1	free base	S6 Kinase,Akt	AT7867 is a potent ATP-competitive inhibitor of Akt1/2/3 and p70S6K/PKA with IC50 of 32 nM/17 nM/47 nM and 85 nM/20 nM, respectively; little activity outside the AGC kinase family.	C1(=CC=C(C=C1)C2(C3=CC=C(C=C3)C4=CNN=C4)CCNCC2)Cl	201	http://www.selleckchem.com/products/AT7867.html	PI3K/Akt/mTOR
23	S1705	Progesterone	M08	M	08	384-L1700-02	314.46	57-83-0	free base	Others	Progesterone is a C-21 steroid hormone.	C1C(C=C2[C@](C1)([C@]3([C@@](CC2)([C@]4([C@](CC3)([C@@H](CC4)C(C)=O)C)[H])[H])[H])C)=O	69	http://www.selleckchem.com/products/Progesterone(Prometrium).html	Others
31	S1573	Fasudil (HA-1077) HCl	M09	M	09	384-L1700-02	327.83	105628-07-7	hydrochloride	ROCK,Autophagy	Fasudil (HA-1077) is a potent inhibitor of ROCK-II, PKA, PKG, PKC, and MLCK with Ki of 0.33 μM, 1.6 μM, 1.6 μM, 3.3 μM and 36 μM, respectively.	C1(=C2C(=C(C=C1)S(N3CCNCCC3)(=O)=O)C=CN=C2).Cl	15	http://www.selleckchem.com/products/Fasudil-HCl(HA-1077).html	Cell Cycle
31	S1716	Glyburide	M10	M	10	384-L1700-02	494	10238-21-8	free base	Others	Glyburide (Diabeta) is an anti-diabetic compound in a class of medications known as sulfonylureas, closely related to sulfa agents.	C1CCCC(C1)NC(NS(C2=CC=C(C=C2)CCNC(C3=C(C=CC(=C3)Cl)OC)=O)(=O)=O)=O	200	http://www.selleckchem.com/products/Glyburide(Diabeta).html	Others
39	S1593	Apixaban	M11	M	11	384-L1700-02	459.5	503612-47-3	free base	Factor Xa	Apixaban is a highly selective, reversible inhibitor of Factor Xa with Ki of 0.08 nM and 0.17 nM in human and rabbit, respectively.	N1=C(C2=C(N1C3=CC=C(C=C3)OC)C(N(CC2)C4=CC=C(C=C4)N5C(CCCC5)=O)=O)C(N)=O	39	http://www.selleckchem.com/products/Apixaban(BMS-562247-01).html	Metabolism
39	S1730	Indapamide	M12	M	12	384-L1700-02	365.83	26807-65-8	free base	Others	Indapamide(Lozol) is a non-thiazide sulphonamide diuretic compound, generally used in the treatment of hypertension, as well as decompensated cardiac failure.	C1=C(C=C(C(=C1)Cl)S(N)(=O)=O)C(NN2C3=C(CC2C)C=CC=C3)=O	199	http://www.selleckchem.com/products/Indapamide(Lozol).html	Others
47	S1608	Pyridostigmine Bromide	M13	M	13	384-L1700-02	261.12	101-26-8	bromide	AChR	Pyridostigmine Bromide is a parasympathomimetic and a reversible cholinesterase inhibitor.	C1(=C(C=CC=[N+]1C)OC(N(C)C)=O).[Br-]	199	http://www.selleckchem.com/products/Pyridostigmine-Bromide(Mestinon).html	Neuronal Signaling
47	S1739	Thiabendazole	M14	M	14	384-L1700-02	201.25	148-79-8	free base	Others	Thiabendazole inhibites the mitochondrial helminth-specific enzyme, fumarate reductase, with anthelminthic property.	N1=CSC=C1C2NC3=C(N=2)C=CC=C3	198	http://www.selleckchem.com/products/Thiabendazole.html	Others
55	S1619	Prilocaine	M15	M	15	384-L1700-02	220.31	721-50-6	free base	Others	Prilocaine is a local anesthetic of the amino amide type.	C1=CC=CC(=C1C)NC(C(NCCC)C)=O	199	http://www.selleckchem.com/products/Prilocaine.html	Others
55	S1759	Pitavastatin Calcium	M16	M	16	384-L1700-02	880.98	147526-32-7	calcium	Others	Pitavastatin calcium is a novel member of the medication class of statins.	[Ca+2].C1(=CC=C2C(=C1)C(=C(C(=N2)C3CC3)C=C[C@@H](O)C[C@H](CC([O-])=O)O)C4=CC=C(C=C4)F).C5=CC=C6C(=C5)C(=C(C(=N6)C7CC7)C=C[C@@H](O)C[C@H](CC([O-])=O)O)C8=CC=C(C=C8)F	57	http://www.selleckchem.com/products/Pitavastatin-calcium(Livalo).html	Others
63	S1629	Orlistat	M17	M	17	384-L1700-02	495.73	96829-58-2	free base	Others	Orlistat is a general lipase inhibitor with IC50 of 122 ng/ml for PL from human duodenal juice.	C1([C@H]([C@@H](O1)C[C@H](CCCCCCCCCCC)OC(=O)[C@H](CC(C)C)NC=O)CCCCCC)=O	199	http://www.selleckchem.com/products/Orlistat(Alli).html	Others
63	S1770	Sulfadiazine	M18	M	18	384-L1700-02	250.28	68-35-9	free base	Others	Sulfadiazine is a sulfonamide antibiotic.	C1=CC=NC(=N1)NS(C2=CC=C(C=C2)N)(=O)=O	199	http://www.selleckchem.com/products/Sulfadiazine.html	Others
71	S1640	Albendazole	M19	M	19	384-L1700-02	265.33	54965-21-8	free base	Others	Albendazole is a member of the benzimidazole compounds used as a drug indicated for the treatment of a variety of worm infestations.	C1(=CC=C2C(=C1)NC(=N2)NC(OC)=O)SCCC	64	http://www.selleckchem.com/products/Albendazole(Albenza).html	Others
71	S1787	Teniposide	M20	M	20	384-L1700-02	656.65	29767-20-2	free base	Others	Teniposide(Vumon)is a chemotherapeutic medication mainly used in the treatment of childhood acute lymphocytic leukemia (ALL).	C1=C2C(=CC3=C1OCO3)[C@@H]([C@@]4([C@@H]([C@@H]2O[C@H]5[C@@H]([C@H]([C@H]6[C@H](O5)CO[C@H](O6)C7=CC=CS7)O)O)COC4=O)[H])C8=CC(=C(C(=C8)OC)O)OC	60	http://www.selleckchem.com/products/Teniposide(Vumon).html	Others
79	S1651	Telbivudine	M21	M	21	384-L1700-02	242.23	3424-98-4	free base	Others	Telbivudine is an antiviral agent used in the treatment of hepatitis B infection.	N1C(C(=CN(C1=O)[C@@H]2C[C@H]([C@@H](O2)CO)O)C)=O	198	http://www.selleckchem.com/products/Telbivudine(Sebivo).html	Others
79	S1805	Acetylcholine Chloride	M22	M	22	384-L1700-02	181.66	60-31-1	chloride	AChR	The chemical compound acetylcholine (ACh) is a neurotransmitter in both the peripheral nervous system (PNS) and central nervous system (CNS) in many organisms including humans.	CC(OCC[N+](C)(C)C)=O.[Cl-]	198	http://www.selleckchem.com/products/Acetylcholine-chloride.html	Neuronal Signaling
7	S1839	Chloroxine	N03	N	03	384-L1700-02	214.05	773-76-2	free base	Others	Chloroxine is a synthetic antibacterial compound that is effective in the treatment of dandruff and seborrheic dermatitis when incorporated in a shampoo.	C1=C(C2=C(C(=C1Cl)O)N=CC=C2)Cl	200	http://www.selleckchem.com/products/Chloroxine.html	Others
7	S2021	Chlormezanone	N04	N	04	384-L1700-02	273.74	80-77-3	free base	Others	Chlormezanone(Trancopal)，a non-benzodiazepine that is used in the management of anxiety. It has been suggested for use in the treatment of muscle spasm.	C1=C(C=CC(=C1)C2S(CCC(N2C)=O)(=O)=O)Cl	200	http://www.selleckchem.com/products/Chlormezanone(Trancopal).html	Others
15	S1855	Pefloxacin Mesylate	N05	N	05	384-L1700-02	429.46	70458-95-6	mesylate	Others	Pefloxacin mesylate is a synthetic chemotherapeutic agent and an antibacterial agent with IC50 of 6.7 nM.	C1(=C(C=C2C(=C1)C(C(=CN2CC)C(=O)O)=O)N3CCN(CC3)C)F.S(C)(=O)(=O)O	32	http://www.selleckchem.com/products/pefloxacin-mesylate.html	Others
15	S2032	Rebamipide	N06	N	06	384-L1700-02	370.79	90098-04-7	free base	Others	Rebamipide is a cholecystokinin type 1 (CCK1) receptor inhibitor for inhibiting [125I]BH-CCK-8S with IC50 of 37.7 μM.	C1(C(NC(CC2=CC(NC3=C2C=CC=C3)=O)C(=O)O)=O)=CC=C(C=C1)Cl	199	http://www.selleckchem.com/products/rebamipide.html	Others
23	S1880	Roxatidine Acetate HCl	N07	N	07	384-L1700-02	384.9	93793-83-0	hydrochloride	Histamine Receptor	Roxatidine Acetate HCl is a specific and competitive histamin H2-receptor antagonist, with IC50 of 3.2 μM, inhibits gastric acid secretion and ulcer formation.	C(C1=CC(=CC=C1)OCCCNC(COC(C)=O)=O)N2(CCCCC2).Cl	200	http://www.selleckchem.com/products/roxatidine-acetate-hcl.html	Neuronal Signaling
23	S2043	Memantine HCl	N08	N	08	384-L1700-02	215.76	41100-52-1	hydrochloride	AMPA Receptor-kainate Receptor-NMDA Receptor	Memantine hydrochloride (Namenda) is a CYP2B6 and CYP2D6 inhibitor for recombinant CYP2B6 and CYP2D6 with Ki of 0.51 nM and 94.9 μM, respectively.	Cl.C12(CC3CC(C1)(CC(C2)(C3)C)N)C	199	http://www.selleckchem.com/products/memantine-hydrochloride-namenda.html	Neuronal Signaling
31	S1891	Carbidopa	N09	N	09	384-L1700-02	226.23	28860-95-9	free base	Others	Carbidopa is an aromatic-L-amino-acid decarboxylase inhibitor with an IC50 of 29 ± 2 μM.	C1(=C(C=CC(=C1)C[C@](C(O)=O)(C)NN)O)O	17	http://www.selleckchem.com/products/Carbidopa.html	Others
31	S2055	Gimeracil	N10	N	10	384-L1700-02	145.54	103766-25-2	free base	Dehydrogenase	Gimeracil is an inhibitor of dihydropyrimidine dehydrogenase, which inhibits the early step in homologous recombination for double strand breaks repair.	C1(=CNC(C=C1O)=O)Cl	199	http://www.selleckchem.com/products/gimeracil.html	Metabolism
39	S1903	Diclofenac Sodium	N11	N	11	384-L1700-02	318.13	15307-79-6	sodium	COX	Diclofenac Sodium is a non-selective COX inhibitor with IC50 of 60 and 220 nM for ovine COX-1 and -2, respectively.	C1(=C(C(=C(C=C1)Cl)NC2=C(CC([O-])=O)C=CC=C2)Cl).[Na+]	201	http://www.selleckchem.com/products/Diclofenac-sodium.html	Neuronal Signaling
39	S2066	Moxonidine	N12	N	12	384-L1700-02	241.68	75438-57-2	free base	Others	Moxonidine is a selective agonist at the imidazoline receptor subtype 1, used as antihypertensive agent.	N1=C(N=C(C(=C1Cl)NC2=NCCN2)OC)C	99	http://www.selleckchem.com/products/moxonidine.html	Others
47	S1914	Pregnenolone	N13	N	13	384-L1700-02	316.48	145-13-1	free base	Estrogen/progestogen Receptor	Pregnenolone is an endogenous steroid hormone for inhibition of M1 receptor- and M3 receptor-mediated currents with IC50 of 11.4 µM and 6.0 µM, respectively.	C1[C@@H](CC2[C@](C1)([C@]3([C@@](CC=2)([C@]4([C@](CC3)([C@@H](CC4)C(=O)C)C)[H])[H])[H])C)O	69	http://www.selleckchem.com/products/pregnenolone.html	Endocrinology & Hormones
47	S2081	Cilazapril Monohydrate	N14	N	14	384-L1700-02	435.51	92077-78-6	monohydrate	RAAS	Cilazapril is a angiotensin-converting enzyme (ACE) inhibitor used for the treatment of hypertension and congestive heart failure.	C1(=CC=C(C=C1)CC[C@H](N[C@H]2CCCN3N(C2=O)[C@H](CCC3)C(O)=O)C(=O)OCC).O	199	http://www.selleckchem.com/products/cilazapril-monohydrate-inhibace.html	Endocrinology & Hormones
55	S1933	Triamcinolone	N15	N	15	384-L1700-02	394.43	124-94-7	free base	Others	Triamcinolone is a glucocorticoid given, as the free alcohol or in esterified form, orally, intramuscularly, by local injection, by inhalation, or applied topically in the management of various disorders in which corticosteroids are indicated.	C1C(C=C2[C@](C=1)([C@]3([C@@](CC2)([C@]4([C@](C[C@H]3O)([C@@]([C@@H](C4)O)(C(CO)=O)O)C)[H])[H])F)C)=O	200	http://www.selleckchem.com/products/Triamcinolone(Aristocort).html	Others
55	S2096	Almotriptan Malate	N16	N	16	384-L1700-02	469.55	181183-52-8	malate	5-HT Receptor	Almotriptan Malate is a selective 5-hydroxytryptamine1B/1D (5-HT1B/1D) receptor agonist, used for the treatment of Migraine attacks in adults.	C1(=CC=C2C(=C1)C(=CN2)CCN(C)C)CS(N3CCCC3)(=O)=O.C(C(CC(O)=O)O)(=O)O	200	http://www.selleckchem.com/products/almotriptan-malate-axert.html	Neuronal Signaling
63	S1957	Sulfamethizole	N17	N	17	384-L1700-02	270.33	144-82-1	free base	Others	Sulfamethizole(Proklar) is a sulfathiazole antibacterial agent.	C1=C(C=CC(=C1)S(NC2SC(=NN=2)C)(=O)=O)N	199	http://www.selleckchem.com/products/Sulfamethizole(Proklar).html	Others
63	S2108	Flunixin Meglumin	N18	N	18	384-L1700-02	491.46	42461-84-7	meglumine	COX	Flunixin meglumine is a potent inhibitor of the enzyme cyclooxygenase used as analgesic agent with anti-inflammatory and antipyretic activity.	C1(C(=CC=CN=1)C(=O)O)NC2(C(=C(C=CC=2)C(F)(F)F)C).N(C[C@H](O)[C@@H](O)[C@H](O)[C@H](O)CO)C	199	http://www.selleckchem.com/products/flunixin-meglumin.html	Neuronal Signaling
71	S1971	Nicorandil	N19	N	19	384-L1700-02	211.17	65141-46-0	free base	Potassium Channel	Nicorandil is potassium channel activator.	C1=CN=CC(=C1)C(=O)NCCO[N+]([O-])=O	198	http://www.selleckchem.com/products/Nicorandil(Ikorel).html	Transmembrane Transporters
71	S2121	Licofelone	N20	N	20	384-L1700-02	379.88	156897-06-2	free base	COX	Licofelone is a dual COX/LOX inhibitor being considered as a treatment for osteoarthritis.	C1(C2=CC=C(C=C2)Cl)C(=C3N(C=1CC(=O)O)CC(C3)(C)C)C4=CC=CC=C4	200	http://www.selleckchem.com/products/licofelone.html	Neuronal Signaling
79	S1987	Mometasone furoate	N21	N	21	384-L1700-02	521.43	83919-23-7	furoate	Others	Mometasone furoate is a glucocorticosteroid used topically to reduce inflammation of the skin or in the airways.	C1C(C=C2[C@](C=1)([C@]3([C@@](CC2)([C@]4([C@](C[C@H]3O)([C@@]([C@@H](C4)C)(C(CCl)=O)OC(=O)C5=CC=CO5)C)[H])[H])Cl)C)=O	11	http://www.selleckchem.com/products/mometasone-furoate.html	Others
79	S2131	Roflumilast	N22	N	22	384-L1700-02	403.21	162401-32-3	free base	PDE	Roflumilast is a selective inhibitor of PDE4 with IC50 of 0.2-4.3 nM.	N1=CC(=C(C(=C1)Cl)NC(C2=CC=C(C(=C2)OCC3CC3)OC(F)F)=O)Cl	200	http://www.selleckchem.com/products/Roflumilast(Daxas).html	Metabolism
8	S1534	Org 27569	O03	O	03	384-L1700-02	409.95	868273-06-7	free base	Cannabinoid Receptor	Org 27569 is an allosteric modulator of cannabinoid CB1 receptor, induces a CB1 receptor state that is characterized by enhanced agonist affinity and decreased inverse agonist affinity.	C1(=CC=C2C(=C1)C(=C(N2)C(=O)NCCC3=CC=C(C=C3)N4CCCCC4)CC)Cl	200	http://www.selleckchem.com/products/Org-27569.html	GPCR & G Protein
8	S1677	Chloramphenicol	O04	O	04	384-L1700-02	323.13	56-75-7	free base	Others	Chloramphenicol is a bacteriostatic antimicrobial.	C1=C(C=CC(=C1)[C@H]([C@H](NC(=O)C(Cl)Cl)CO)O)[N+](=O)[O-]	201	http://www.selleckchem.com/products/Chloramphenicol(Chloromycetin).html	Others
16	S1547	Febuxostat	O05	O	05	384-L1700-02	316.37	144060-53-7	free base	Others	Febuxostat is selective xanthine oxidase inhibitor with Ki of 0.6 nM.	C1(=C(C=CC(=C1)C2SC(=C(N=2)C)C(O)=O)OCC(C)C)C#N	199	http://www.selleckchem.com/products/Febuxostat(Uloric).html	Others
16	S1692	Busulfan	O06	O	06	384-L1700-02	246.3	55-98-1	free base	Others	Busulfan(Myleran, Busulfex) is a cell cycle non-specific alkylating antineoplastic agent.	CS(OCCCCOS(C)(=O)=O)(=O)=O	198	http://www.selleckchem.com/products/Busulfan(Busulfex).html	Others
24	S1561	BMS-777607	O07	O	07	384-L1700-02	512.89	1025720-94-8	free base	Axl,c-Met	BMS-777607 is a Met-related inhibitor for c-Met, Axl, Ron and Tyro3 with IC50 of 3.9 nM, 1.1 nM, 1.8 nM and 4.3 nM, 40-fold more selective for Met-related targets versus Lck, VEGFR-2, and TrkA/B, and more than 500-fold greater selectivity versus all other receptor and non receptor kinases. Phase 1/2.	C1(=C(N=CC=C1OC2=CC=C(C=C2F)NC(=O)C3C(N(C=CC=3OCC)C4=CC=C(C=C4)F)=O)N)Cl	91	http://www.selleckchem.com/products/BMS-777607.html	Protein Tyrosine Kinase
24	S1706	Lamivudine	O08	O	08	384-L1700-02	229.26	134678-17-4	free base	Reverse Transcriptase	Lamivudine(Epivir) is a potent nucleoside analog reverse transcriptase inhibitor with an IC50 of 2.7 mM.	N1=C(C=CN(C1=O)[C@H]2O[C@H](SC2)CO)N	200	http://www.selleckchem.com/products/Lamivudine(Epivir).html	Microbiology
32	S1574	BIRB 796 (Doramapimod)	O09	O	09	384-L1700-02	527.66	285983-48-4	free base	p38 MAPK	BIRB 796 (Doramapimod) is a highly selective p38α MAPK inhibitor with Kd of 0.1 nM, 330-fold greater selectivity versus JNK2, weak inhibition for c-RAF, Fyn and Lck, insignificant inhibition of ERK-1, SYK, IKK2, ZAP-70, EGFR, HER2, PKA, PKC, PKCα/β/γ.	C1=C(C2=C(C(=C1)OCCN3CCOCC3)C=CC=C2)NC(NC4=CC(=NN4C5=CC=C(C=C5)C)C(C)(C)C)=O	200	http://www.selleckchem.com/products/BIRB-796-(Doramapimod).html	MAPK
32	S1718	Adefovir Dipivoxil	O10	O	10	384-L1700-02	501.47	142340-99-6	free base	Reverse Transcriptase	Adefovir Dipivoxil(Preveon, Hepsera) works by blocking reverse transcriptase, an enzyme that is crucial for the hepatitis B virus (HBV) to reproduce in the body.	C12=C(N=CN=C1N)N(C=N2)CCOCP(OCOC(C(C)(C)C)=O)(=O)OCOC(C(C)(C)C)=O	199	http://www.selleckchem.com/products/Adefovir-Dipivoxil(Preveon).html	Microbiology
40	S1594	Semagacestat (LY450139)	O11	O	11	384-L1700-02	361.44	425386-60-3	free base	Gamma-secretase	Semagacestat (LY450139) is a γ-secretase blocker for Aβ42, Aβ40 and Aβ38 with IC50 of 10.9 nM, 12.1 nM and 12.0 nM, also inhibits Notch signaling with IC50 of 14.1 nM. Phase 3.	C([C@@H](C(N[C@H](C(N[C@@H]1C2=C(CCN(C(=O)1)C)C=CC=C2)=O)C)=O)O)(C)C	199	http://www.selleckchem.com/products/Semagacestat(LY450139).html	Proteases
40	S1732	Mitotane	O12	O	12	384-L1700-02	320.04	53-19-0	free base	Others	Mitotane(Lysodren), is an antineoplastic medication used in the treatment of adrenocortical carcinoma.	C1=C(C=CC(=C1)C(C2=C(C=CC=C2)Cl)C(Cl)Cl)Cl	199	http://www.selleckchem.com/products/Mitotane(Lysodren).html	Others
48	S1609	Methimazole	O13	O	13	384-L1700-02	114.17	60-56-0	free base	Others	Methimazole(Tapazole, Northyx) is an antithyroid medicine.	N1C=CN(C1=S)C	201	http://www.selleckchem.com/products/Methimazole(Tapazole).html	Others
48	S1740	Guaifenesin	O14	O	14	384-L1700-02	198.22	93-14-1	free base	Others	Guaifenesin(Guaiphenesin) is thought to act as an expectorant.	C1=CC(=C(C=C1)OCC(CO)O)OC	201	http://www.selleckchem.com/products/Guaifenesin(Guaiphenesin).html	Others
56	S1620	Darunavir Ethanolate	O15	O	15	384-L1700-02	593.73	635728-49-3	ethanolate	HIV Protease	Darunavir Ethanolate is an HIV protease inhibitor.	[C@@]12([C@]([C@@](CO1)([H])OC(N[C@](CC3=CC=CC=C3)([H])[C@](CN(CC(C)C)S(C4=CC=C(C=C4)N)(=O)=O)([H])O)=O)(CCO2)[H])[H].CCO	200	http://www.selleckchem.com/products/Darunavir-Ethanolate(Prezista).html	Proteases
56	S1760	Rifapentine	O16	O	16	384-L1700-02	877.03	61379-65-5	free base	Others	Rifapentine (Priftin) is an antibiotic compound used in the treatment of tuberculosis.	C1(=C2C(=C3C(=C1O)C4=C(C(=C3O)C)O[C@@](C4=O)(O/C=C/[C@@H]([C@H]([C@H]([C@@H]([C@@H]([C@@H]([C@H]([C@H](/C=C/C=C(/C(N2)=O)C)C)O)C)O)C)OC(=O)C)C)OC)C)O)/C=N/N5CCN(CC5)C6CCCC6	114	http://www.selleckchem.com/products/Rifapentine(Priftin).html	Others
64	S1630	Allopurinol	O17	O	17	384-L1700-02	136.11	315-30-0	free base	OX Receptor	Allopurinol (Zyloprim) is a xanthine oxidase inhibitor with an IC50 of 7.82±0.12 μM.	N1=CN=C2C(C1=O)=CNN2	198	http://www.selleckchem.com/products/Allopurinol(Zyloprim).html	GPCR & G Protein
64	S1771	Chlorprothixene	O18	O	18	384-L1700-02	315.86	113-59-7	free base	Dopamine Receptor	Chlorprothixene has strong binding affinities to dopamine and histamine receptors, such as D1, D2, D3, D5, H1, 5-HT2, 5-HT6 and 5-HT7, with Ki of 18 nM, 2.96 nM, 4.56 nM, 9 nM, 3.75 nM, 9.4 nM, 3 nM and 5.6 nM, respectively.	C1=CC=C2C(=C1)SC3=C(C/2=C/CCN(C)C)C=C(C=C3)Cl	18	http://www.selleckchem.com/products/Chlorprothixene.html	Neuronal Signaling
72	S1641	Chlorothiazide	O19	O	19	384-L1700-02	295.72	58-94-6	free base	Others	Chlorothiazide is a diuretic and antihypertensive. (IC50=3.8 mM)	C1(=C(C=C2C(=C1)N=CNS2(=O)=O)S(N)(=O)=O)Cl	199	http://www.selleckchem.com/products/Chlorothiazide(Diuril).html	Others
72	S1790	Rifaximin	O20	O	20	384-L1700-02	785.88	80621-81-4	free base	Others	Rifaximin(Xifaxan), an orally administered, semi-synthetic, nonsystemic antibiotic derived from rifamycin SV with antibacterial activity.	[C@@H]1([C@H]([C@@H]([C@@H]([C@H](/C=C/O[C@@]2(OC3C(=C(C4C(=C(NC(/C(=C\C=C\[C@H]([C@@H]([C@@H]1C)O)C)C)=O)C5=C(C=4C=3C2=O)N=C6N5C=CC(=C6)C)O)O)C)C)OC)C)OC(C)=O)C)O	59	http://www.selleckchem.com/products/Rifaximin(Xifaxan).html	Others
80	S1652	Monobenzone	O21	O	21	384-L1700-02	200.23	103-16-2	free base	Others	Monobenzone is a compound used as a topical agent for medical depigmentation.	C1=C(C=CC(=C1)O)OCC2=CC=CC=C2	199	http://www.selleckchem.com/products/Monobenzone(Benoquin).html	Others
80	S1806	Acipimox	O22	O	22	384-L1700-02	154.12	51037-30-0	free base	Others	Acipimox is a niacin derivative used as a hypolipidemic agent.	C1=C([N+](=CC(=N1)C(=O)O)[O-])C	201	http://www.selleckchem.com/products/Acipimox.html	Others
8	S1840	Lomustine	P03	P	03	384-L1700-02	233.7	13010-47-4	free base	Others	Lomustine inhibits cancer cells by damaging the DNA and stops cells from dividing.	C1CCCC(C1)NC(N(CCCl)N=O)=O	201	http://www.selleckchem.com/products/Lomustine(CeeNU).html	Others
8	S2024	Ketotifen Fumarate	P04	P	04	384-L1700-02	425.5	34580-14-8	fumarate	Histamine Receptor	Ketotifen fumarate (Zaditor) is a fumaric acid salt of ketotifen which is a H1-antihistamine and mast cell stabilizer.	C12(C(CC3=C(C(C=1C=CS2)=C4CCN(CC4)C)C=CC=C3)=O).C(/C=C/C(O)=O)(O)=O	18	http://www.selleckchem.com/products/ketotifen-fumarate-zaditor.html	Neuronal Signaling
16	S1856	Metoprolol Tartrate	P05	P	05	384-L1700-02	684.81	392-17-7	tartrate	Adrenergic Receptor	Metoprolol tartrate is a cardioselective β-adrenergic receptor blocker with IC50 of 42 ng/mL.	[C@H](C(O)=O)([C@H](C(O)=O)O)O.C1(=C(C=CC(=C1)OCC(CNC(C)C)O)CCOC).C2=C(C=CC(=C2)OCC(CNC(C)C)O)CCOC	146	http://www.selleckchem.com/products/metoprolol-tartrate.html	Neuronal Signaling
16	S2035	Epalrestat	P06	P	06	384-L1700-02	319.4	82159-09-9	free base	Others	Epalrestat is an aldose reductase inhibitor with IC50 of 72 nM.	C1=CC=CC(=C1)/C=C(/C=C2\SC(N(C2=O)CC(O)=O)=S)C	10	http://www.selleckchem.com/products/epalrestat.html	Others
24	S1881	Protionamide	P07	P	07	384-L1700-02	180.27	14222-60-7	free base	Others	Protionamide is a drug used in the treatment of tuberculosis.	C1(=NC=CC(=C1)C(N)=S)CCC	199	http://www.selleckchem.com/products/protionamide-prothionamide.html	Others
24	S2044	Cyproheptadine HCl	P08	P	08	384-L1700-02	323.86	969-33-5	hydrochloride	Histamine Receptor	Cyproheptadine hydrochloride (Periactin) is a hydrochloride salt form of cyproheptadine which is a histamine receptor antagonist for 5-HT2 receptor with IC50 of 0.6 nM.	C1(=C2CCN(CC2)C)(C3=C(C=CC4=C1C=CC=C4)C=CC=C3).Cl	200	http://www.selleckchem.com/products/cyproheptadine-hydrochloride-periactin.html	Neuronal Signaling
32	S1894	Valsartan	P09	P	09	384-L1700-02	435.52	137862-53-4	free base	RAAS	Valsartan (Diovan) is an angiotensin II receptor antagonist with IC50 of ranging from 39.5 to 116 μM	C1(=CC=C(C=C1)C2=CC=CC=C2C3N=NNN=3)CN([C@@](C(C)C)(C(=O)O)[H])C(=O)CCCC	199	http://www.selleckchem.com/products/Valsartan(Diovan).html	Endocrinology & Hormones
32	S2058	Tolnaftate	P10	P	10	384-L1700-02	307.41	2398-96-1	free base	Others	Tolnaftate is a synthetic thiocarbamate used as an anti-fungal agent.	C1(N(C(OC2=CC=C3C(=C2)C=CC=C3)=S)C)=CC(=CC=C1)C	201	http://www.selleckchem.com/products/tolnaftate.html	Others
40	S1904	Avobenzone	P11	P	11	384-L1700-02	310.39	70356-09-1	free base	Others	Avobenzone is an oil soluble ingredient used in sunscreen products to absorb the full spectrum of UVA rays and a dibenzoylmethane derivative.	C1=C(C=CC(=C1)C(CC(C2=CC=C(C=C2)C(C)(C)C)=O)=O)OC	199	http://www.selleckchem.com/products/Avobenzone(Parsol-1789).html	Others
40	S2067	Ozagrel HCl	P12	P	12	384-L1700-02	264.71	78712-43-3	hydrochloride	Others	Ozagrel HCl is a selective thromboxane A2 synthetase enzyme inhibitors with IC50 of 11 nM, used as antiasthmatic agent.	C1(=C(C=CC(=C1)/C=C/C(O)=O)CN2C=NC=C2).Cl	200	http://www.selleckchem.com/products/ozagrel-hydrochloride.html	Others
48	S1915	Sulfamethoxazole	P13	P	13	384-L1700-02	253.28	723-46-6	free base	Others	Sulfamethoxazole is a sulfonamide bacteriostatic antibiotic with an IC50 of 2.7 μM.	C1=C(C=CC(=C1)S(NC2C=C(ON=2)C)(=O)=O)N	201	http://www.selleckchem.com/products/Sulfamethoxazole.html	Others
48	S2082	Adiphenine HCl	P14	P	14	384-L1700-02	347.88	50-42-0	hydrochloride	Others	Adiphenine is a nicotinic receptor inhibitor with IC50 of 15 µM, used as an antispasmodic drug.	C(C(C1=CC=CC=C1)C2=CC=CC=C2)(OCCN(CC)CC)=O.Cl	86	http://www.selleckchem.com/products/adiphenine-hcl.html	Others
56	S1934	Nystatin (Fungicidin)	P15	P	15	384-L1700-02	926.09	1400-61-9	free base	Others	Nystatin (Mycostatin) is a polyene antifungal agent to which many molds and yeasts are sensitive, including Candida spp.	[C@@H]1([C@H](C)[C@@H]([C@H](/C=C/C=C/CC/C=C/C=C/C=C/C=C/[C@@H](C[C@@H]2O[C@@](C[C@@H](O)[C@H](CC[C@@H](O)C[C@@H](O)C[C@@H](O)CC(=O)O1)O)(C[C@@H]([C@H]2C(=O)O)O)O)O[C@@H]3[C@@H]([C@@H]([C@H]([C@@H](O3)C)O)N)O)C)O)C	20	http://www.selleckchem.com/products/Nystatin(Mycostatin).html	Others
56	S2097	Ambrisentan	P16	P	16	384-L1700-02	378.42	177036-94-1	free base	Others	Ambrisentan, a highly selective antagonist of the endothelin-1 type A receptor with IC50 of 18 nM, is indicated for the treatment of pulmonary arterial hypertension (PAH).	[C@@H](OC1=NC(=CC(=N1)C)C)(C(O)=O)C(C2=CC=CC=C2)(C3=CC=CC=C3)OC	200	http://www.selleckchem.com/products/ambrisentan.html	Others
64	S1958	Sulbactam	P17	P	17	384-L1700-02	233.24	68373-14-8	free base	Others	Sulbactam is a beta-lactamase inhibitor with an average IC50 of 0.8 μM.	C1(C[C@@]2(N1[C@](C(S2(=O)=O)(C)C)([H])C(O)=O)[H])=O	201	http://www.selleckchem.com/products/sulbactam.html	Others
64	S2109	Imidapril HCl	P18	P	18	384-L1700-02	441.91	89396-94-1	free base	RAAS	Imidapril HCl is a angiotensin-converting enzyme (ACE) inhibitor with IC50 of 2.6 nM, used for the treatment of hypertension.	CCOC(=O)[C@@H](N[C@H](C(N1C(N(C[C@@H]1C(=O)O)C)=O)=O)C)CCC2=CC=CC=C2	199	http://www.selleckchem.com/products/imidapril-tanatril.html	Endocrinology & Hormones
72	S1972	Tamoxifen Citrate	P19	P	19	384-L1700-02	563.64	54965-24-1	citrate	Estrogen/progestogen Receptor,Autophagy	Tamoxifen Citrate is an antagonist of the estrogen receptor by competitive inhibition of estrogen binding.	C1(=CC=C(C=C1)/C(=C(/CC)C2=CC=CC=C2)C3=CC=CC=C3)OCCN(C)C.C(CC(CC(=O)O)(C(=O)O)O)(=O)O	177	http://www.selleckchem.com/products/Tamoxifen-Citrate(Nolvadex).html	Endocrinology & Hormones
72	S2123	Dextrose	P20	P	20	384-L1700-02	180.16	50-99-7	free base	Others	Dextrose, a simple sugar (monosaccharide), is an important carbohydrate in biology.	OC[C@H]([C@H]([C@@H]([C@H](C=O)O)O)O)O	199	http://www.selleckchem.com/products/Dextrose(D-glucose).html	Others
80	S1988	Propylthiouracil	P21	P	21	384-L1700-02	170.23	51-52-5	free base	Others	Propylthiouracil is a thyroperoxidase and 5'-deiodinase inhibitor.	C1=C(NC(NC1=O)=S)CCC	199	http://www.selleckchem.com/products/Propylthiouracil.html	Others
80	S2134	AZD8330	P22	P	22	384-L1700-02	461.23	869357-68-6	free base	MEK	AZD8330 is a novel, selective, non-ATP competitive MEK 1/2 inhibitor with IC50 of 7 nM. Phase 1.	C1=C(C=CC(=C1F)NC2N(C(C(=CC=2C(NOCCO)=O)C)=O)C)I	199	http://www.selleckchem.com/products/AZD8330(ARRY-424704).html	MAPK
1	S2160	Almorexant HCl	A03	A	03	384-L1700-03	549.02	913358-93-7	HCl	OX Receptor	Almorexant HCl is an orally active, dual orexin receptor antagonist with IC50 of 6.6 nM and 3.4 nM for OX1 and OX2 receptor, respectively. Phase 3.	C1(=CC(=CC=C1)[C@@H](C(NC)=O)N2CCC3=C([C@@H]2CCC4=CC=C(C=C4)C(F)(F)F)C=C(C(=C3)OC)OC).Cl	72	www.selleckchem.com/products/almorexant-hcl.html	GPCR & G Protein
1	S2302	Glycyrrhizic Acid	A04	A	04	384-L1700-03	822.93	1405-86-3	free base	Others	Glycyrrhizic acid is a widely used anti-inflammatory agent isolated from the licorice root.	C1[C@@H](C([C@]2([C@](C1)([C@]3([C@@](CC2)([C@]4(C(=CC3=O)[C@@]5([C@@](CC4)(CC[C@@](C5)(C(O)=O)C)C)[H])C)C)[H])C)[H])(C)C)O[C@H]6O[C@@H]([C@H]([C@@H]([C@@H]6O[C@@H]7O[C@@H]([C@H]([C@@H]([C@@H]7O)O)O)C(O)=O)O)O)C(O)=O	142	http://www.selleckchem.com/products/Glycyrrhizic-acid.html	Others
9	S2177	Dichlorphenamide	A05	A	05	384-L1700-03	305.16	120-97-8	free base	Others	Dichlorphenamide is a sulfonamide and a carbonic anhydrase inhibitor of the meta-Disulfamoylbenzene class.	C1(=C(C(=CC(=C1)S(N)(=O)=O)S(N)(=O)=O)Cl)Cl	199	http://www.selleckchem.com/products/Dichlorphenamide(Diclofenamide).html	Others
9	S2312	Icariin	A06	A	06	384-L1700-03	676.66	489-32-7	free base	PDE	Icariin is a cGMP-specific PDE5 inhibitor with IC50 of 0.432 μM, 167-fold more selective for PDE5 than PDE4.	[C@H]1([C@H]([C@@H]([C@H](C(O1)OC2C=C(C3=C(C=2CC=C(C)C)OC(=C(C3=O)OC4O[C@H]([C@@H]([C@H]([C@@H]4O)O)O)C)C5=CC=C(C=C5)OC)O)O)O)O)CO	73	http://www.selleckchem.com/products/Icariin.html	Metabolism
17	S2187	Avasimibe	A07	A	07	384-L1700-03	501.72	166518-60-1	free base	P450 (e.g. CYP17)	Avasimibe inhibits ACAT with IC50 of 3.3 μM, also inhibits human P450 isoenzymes CYP2C9, CYP1A2 and CYP2C19 with IC50 of 2.9 μM, 13.9 μM and 26.5 μM,	C1=C(C=C(C(=C1C(C)C)CC(NS(OC2=C(C=CC=C2C(C)C)C(C)C)(=O)=O)=O)C(C)C)C(C)C	199	http://www.selleckchem.com/products/Avasimibe(CI-1011).html	Metabolism
17	S2322	(+)-Matrine	A08	A	08	384-L1700-03	248.36	519-02-8	free base	Opioid Receptor	Matrine((+)-Matrine) is an alkaloid found in plants from the Sophora family, which has a variety of pharmacological effects, including anti-cancer effects, and action as a kappa opioid receptor agonist.	C1CCN2[C@]3([C@]1(CN4[C@@]([C@](CCC2)3[H])(CCCC4=O)[H])[H])[H]	10	http://www.selleckchem.com/products/Matrine((+)-Matrine).html	Neuronal Signaling
25	S2202	NVP-BHG712	A09	A	09	384-L1700-03	503.48	940310-85-0	free base	Raf,Src,Bcr-Abl,VEGFR,Ephrin receptor	NVP-BHG712 is a specific EphB4 inhibitor with ED50 of 25 nM that discriminates between VEGFR and EphB4 inhibition; also shows activity against c-Raf, c-Src and c-Abl with IC50 of 0.395 μM, 1.266 μM and 1.667 μM, respectively.	C12=C(N=C(N=C1NC3=CC(=CC=C3C)C(NC4=CC=CC(=C4)C(F)(F)F)=O)C5=CC=CN=C5)N(N=C2)C	200	http://www.selleckchem.com/products/NVP-BHG712.html	Protein Tyrosine Kinase
25	S2333	Nobiletin	A10	A	10	384-L1700-03	402.39	478-01-3	free base	Others	Nobiletin, a citrus flavonoid isolated from citrus peels like in tangerine, which has anti-inflammatory and anti-tumor activities.	C1(=C(C(=C2C(=C1OC)OC(=CC2=O)C3=CC(=C(C=C3)OC)OC)OC)OC)OC	201	http://www.selleckchem.com/products/Nobiletin(Hexamethoxyflavone).html	Others
33	S2218	PP242	A11	A	11	384-L1700-03	308.34	1092351-67-1	free base	mTOR,Autophagy	PP242 is a selective mTOR inhibitor with IC50 of 8 nM; targets both mTOR complexes with >10- and 100-fold selectivity for mTOR than PI3Kδ or PI3Kα/β/γ, respectively.	N1=CN=C2C(=C1N)C(=NN2C(C)C)C3NC4=C(C=3)C=C(C=C4)O	201	http://www.selleckchem.com/products/PP242.html	PI3K/Akt/mTOR
33	S2342	Phloretin	A12	A	12	384-L1700-03	274.27	60-82-2	free base	Others	Phloretin is a dihydrochalcone found in apple tree leaves, which shows beneficial effects on diabetes.	C1(=CC(=C(C(=C1)O)C(CCC2=CC=C(C=C2)O)=O)O)O	200	http://www.selleckchem.com/products/Phloretin(Dihydronaringenin).html	Others
41	S2228	VX-765	A13	A	13	384-L1700-03	509	273404-37-8,851091-96-8	free base	Caspase	VX-765 is a potent and selective inhibitor of caspase-1 with Ki of 0.8 nM.	C1(=CC(=C(C=C1)N)Cl)C(N[C@H](C(=O)N2[C@@H](CCC2)C(N[C@H]3CC(O[C@@H]3OCC)=O)=O)C(C)(C)C)=O	196	http://www.selleckchem.com/products/VX-765.html	Apoptosis
41	S2354	Sclareol	A14	A	14	384-L1700-03	308.5	515-03-7	free base	Others	Sclareol, a labdane-type diterpene isolated from clary sage (Salvia sclarea), exerts growth inhibition and cytotoxic activity against a variety of human cancer cell lines.	C1[C@@]([C@@H]([C@@]2(C(C1)C(CCC2)(C)C)C)CCC(C)(C=C)O)(C)O	10	http://www.selleckchem.com/products/Sclareol.html	Others
49	S2239	Tubacin	A15	A	15	384-L1700-03	721.86	537049-40-4	Free Base	HDAC	Tubacin is a highly potent and selective, reversible, cell-permeable HDAC6 inhibitor with an IC50 of 4 nM, approximately 350-fold selectivity over HDAC1.	[C@@H]1(C[C@H](O[C@H](O1)C2=CC=C(C=C2)NC(=O)CCCCCCC(NO)=O)C3=CC=C(C=C3)CO)CSC4OC(=C(N=4)C5=CC=CC=C5)C6=CC=CC=C6	100	www.selleckchem.com/products/Tubacin.html	Cytoskeletal Signaling
49	S2364	Tanshinone I	A16	A	16	384-L1700-03	276.29	568-73-0	free base	Others	Tanshinone I, an active principle isolated from Salvia miltiorrhiza (Danshen), is structurally similar to tanshinone IIA and may possess similar cytotoxic effects on tumor cells.	C1=CC=C2C(=C1C)C=CC3=C2C(C(C4=C3OC=C4C)=O)=O	83	http://www.selleckchem.com/products/Tanshinone-I.html	Others
57	S2253	3-Indolebutyric acid (IBA)	A17	A	17	384-L1700-03	203.24	133-32-4	free base	Others	3-Indolebutyric acid(IBA) is a plant hormone in the auxin family and is an ingredient in many commercial plant rooting horticultural products.	C1=CC=CC2=C1NC=C2CCCC(O)=O	201	http://www.selleckchem.com/products/3-Indolebutyric-acid(IBA).html	Others
57	S2373	Yohimbine HCl	A18	A	18	384-L1700-03	390.9	65-19-0	hydrochloride	Others	Yohimbine has been used as a mydriatic and in the treatment of impotence. It is also alleged to be an aphrodisiac.	N1(C2=C(C3=C1C=CC=C3)CCN4[C@]2(C[C@]5([C@](C4)(CC[C@@H]([C@@H]5C(OC)=O)O)[H])[H])[H]).Cl	10	http://www.selleckchem.com/products/Yohimbine-hydrochloride(Antagonil).html	Others
65	S2264	Artemether	A19	A	19	384-L1700-03	298.37	71963-77-4	free base	Others	Artemether is an antimalarial for the treatment of resistant strains of falciparum malaria.	[C@]12([C@]34[C@@](CC[C@@]1(C)[H])([C@]([C@H](O[C@@](O[C@@](CC2)(OO3)C)4[H])OC)([H])C)[H])[H]	201	http://www.selleckchem.com/products/Artemether(SM-224).html	Others
65	S2381	D-Mannitol	A20	A	20	384-L1700-03	182.17	69-65-8	free base	Others	D-Mannitol is an osmotic diuretic agent and a weak renal vasodilator.	OC[C@H]([C@H]([C@@H]([C@@H](CO)O)O)O)O	197	http://www.selleckchem.com/products/D-Mannitol(Osmitrol).html	Others
73	S2276	Bilobalide	A21	A	21	384-L1700-03	326.3	33570-04-6	free base	Others	Bilobalide is a biologically active terpenic trilactone present in Ginkgo biloba.	O1C([C@@]23C4([C@@]1(OC([C@@H]4O)=O)[H])[C@](C[C@@]2(OC(C3)=O)[H])(C(C)(C)C)O)=O	199	http://www.selleckchem.com/products/Bilobalide.html	Others
73	S2391	Quercetin	A22	A	22	384-L1700-03	302.24	117-39-5	free base	PKC,Src,PI3K,Sirtuin	Quercetin is a natural flavonoid present in vegetables, fruit and wine and is a PI3K inhibitor with IC50 of 2.4 – 5.4 &mu;M.	C1(=CC(=C2C(=C1)OC(=C(C2=O)O)C3=CC=C(C(=C3)O)O)O)O	10	http://www.selleckchem.com/products/Quercetin(Sophoretin).html	Epigenetics
1	S2410	Paeoniflorin	B03	B	03	384-L1700-03	480.46	23180-57-6	free base	Others	Paeoniflorin is a herbal constituent extracted from the root of Paeonia albiflora Pall.	[C@H]1([C@H]([C@@H]([C@H]([C@@H](O1)O[C@]23[C@@]4([C@@]5(O[C@]2(C)C[C@]([C@@]4(C3)[H])(O5)O)[H])COC(C6=CC=CC=C6)=O)O)O)O)CO	199	http://www.selleckchem.com/products/paeoniflorin.html	Others
1	S2548	Scopine HCl	B04	B	04	384-L1700-03	191.66	85700-55-6	hydrochloride	Others	Scopine HCl is the hydrochloride of Scopine, which is the metabolite of anisodine, which is a α1-adrenergic receptor agonist and used in the treatment of acute circulatory shock.	Cl.[C@]12([C@@]3([C@]([C@@](N1C)(C[C@@H](C2)O)[H])(O3)[H])[H])[H]	198	http://www.selleckchem.com/products/scopine-hcl.html	Others
9	S2425	Apocynin	B05	B	05	384-L1700-03	166.17	498-02-2	free base	Others	Apocynin is a selective NADPH-oxidase inhibitor with IC50 of 10 μM.	C1(C=C(C=CC=1O)C(C)=O)OC	10	http://www.selleckchem.com/products/apocynin-acetovanillone.html	Others
9	S2556	Rosiglitazone	B06	B	06	384-L1700-03	357.43	122320-73-4	free base	PPAR	Rosiglitazone (Avandia) is a potent antihyperglycemic agent and a potent thiazolidinedione insulin sensitizer with IC50 of 12, 4 and 9 nM for rat, 3T3-L1 and human adipocytes, respectively.	C1=CC=NC(=C1)N(CCOC2=CC=C(C=C2)CC3SC(NC3=O)=O)C	201	http://www.selleckchem.com/products/Rosiglitazone-Avandia.html	DNA Damage
17	S2450	Equol	B07	B	07	384-L1700-03	242.27	531-95-3	free base	Estrogen/progestogen Receptor	Equol ,a metabolite of soybeans, is an important isoflavone in humans，specifically binds to 5α-DHT, has a modest affinity for recombinant estrogen receptor ERβ. Phase 2.	C1[C@@H](CC2C(O1)=CC(=CC=2)O)C3C=CC(=CC=3)O	198	http://www.selleckchem.com/products/equol.html	Endocrinology & Hormones
17	S2569	Phenylephrine HCl	B08	B	08	384-L1700-03	203.67	61-76-7	hydrochloride	Adrenergic Receptor	Phenylephrine hydrochloride is a selective α1-adrenergic receptor agonist.	C1(=CC=CC(=C1)[C@](CNC)(O)[H])O.Cl	201	http://www.selleckchem.com/products/Phenylephrine-hydrochloride.html	GPCR & G Protein
25	S2458	Clonidine HCl	B09	B	09	384-L1700-03	266.5	4205-91-8	hydrochloride	Adrenergic Receptor,Autophagy	Clonidine hydrochloride(Catapres) is a direct-acting α2 adrenergic agonist with an ED50 of 0.02±0.01 mg/kg.	C1(=CC=C(C(=C1Cl)NC2NCCN=2)Cl).Cl	198	http://www.selleckchem.com/products/Clonidine-hydrochloride(Catapres).html	Neuronal Signaling
25	S2584	Clobetasol propionate	B10	B	10	384-L1700-03	466.97	25122-46-7	propionate	Others	Clobetasol propionate is a anti-inflammatory corticosteroid used to treat various skin disorders.	C1C(C=C2[C@](C=1)([C@]3([C@@](CC2)([C@]4([C@](C[C@]3(O)[H])([C@@]([C@](C4)(C)[H])(C(CCl)=O)OC(CC)=O)C)[H])[H])F)C)=O	199	http://www.selleckchem.com/products/clobetasol-propionate.html	Others
33	S2471	Gallamine Triethiodide	B11	B	11	384-L1700-03	891.53	65-29-2	lodine salt	AChR	Gallamine triethiodide(Flaxedil) is a cholinergic receptor blocker with an IC50 of 68.0 ± 8.4 μM.	C1(=CC=CC(=C1OCC[N+](CC)(CC)CC)OCC[N+](CC)(CC)CC)OCC[N+](CC)(CC)CC.[I-].[I-].[I-]	112	http://www.selleckchem.com/products/Gallamine-triethiodide(Flaxedil).html	Neuronal Signaling
33	S2599	L-Thyroxine	B12	B	12	384-L1700-03	776.87	51-48-9	free base	Others	L-Thyroxine is a synthetic form of thyroxine and a hormone replacement drug.	C1(=C(C=C(C=C1I)OC2=C(C=C(C=C2I)C[C@@H](C(O)=O)N)I)I)O	199	http://www.selleckchem.com/products/l-thyroxine.html	Others
41	S2484	Milrinone	B13	B	13	384-L1700-03	211.22	78415-72-2	free base	ATPase,PDE	Milrinone is a potent and selective phosphodiesterase 3 inhibitor with an IC50 of 0.42 μM for the inhibition of FIII PDE.	N1=CC=C(C=C1)C2=C(NC(C(=C2)C#N)=O)C	198	http://www.selleckchem.com/products/Milrinone(Primacor).html	Metabolism
41	S2608	Fluocinonide	B14	B	14	384-L1700-03	494.52	356-12-7	free base	Others	Fluocinonide (Vanos) is a potent glucocorticoid steroid used topically as anti-inflammatory agent for the treatment of skin disorders such as eczema.	C1C(C=C2[C@](C=1)([C@]3([C@@](C[C@@H]2F)([C@]4([C@](C[C@H]3O)([C@@]5([C@@H](C4)OC(O5)(C)C)C(COC(C)=O)=O)C)[H])[H])F)C)=O	200	http://www.selleckchem.com/products/Fluocinonide(Vanos).html	Others
49	S2494	Olopatadine HCl	B15	B	15	384-L1700-03	373.87	140462-76-6	hydrochloride	Histamine Receptor	Olopatadine hydrochloride(Opatanol) is a histamine blocker and mast cell stabilizer with an IC50 of 559 μM for the release of histamine	C1(=C\CCN(C)C)(/C2=C(OCC3=C1C=CC=C3)C=CC(=C2)CC(O)=O).Cl	200	http://www.selleckchem.com/products/Olopatadine-hydrochloride(Opatanol).html	Neuronal Signaling
49	S2620	GSK256066	B16	B	16	384-L1700-03	518.58	801312-28-7	free base	PDE	GSK256066 is a selective PDE4B(equal affinity to isoforms A-D) inhibitor with IC50 of 3.2 pM, >380,000-fold selectivity versus PDE1/2/3/5/6 and >2500-fold selectivity against PDE4B versus PDE7.	C1=CC(=CC(=C1)S(C2=CC(=C3C(=C2)C(=C(C=N3)C(=O)N)NC4=CC(=CC=C4)OC)C)(=O)=O)C(N(C)C)=O	10	http://www.selleckchem.com/products/gsk256066.html	Metabolism
57	S2503	Racecadotril	B17	B	17	384-L1700-03	385.48	81110-73-8	free base	Opioid Receptor	Racecadotril is a peripherally acting enkephalinase inhibitor with an IC50 of 4.5 μM	C1=CC=C(C=C1)COC(CNC(C(CSC(=O)C)CC2=CC=CC=C2)=O)=O	57	http://www.selleckchem.com/products/Racecadotril(Acetorphan).html	Neuronal Signaling
57	S2629	PNU-120596	B18	B	18	384-L1700-03	311.72	501925-31-1	free base	AChR	PNU-120596 is a positive allosteric modulator of α7 nAChR with EC50 of 216 nM.	C1(=C(C=C(C(=C1)OC)Cl)NC(NC2=NOC(=C2)C)=O)OC	198	http://www.selleckchem.com/products/pnu120596.html	Neuronal Signaling
65	S2516	Xylazine HCl	B19	B	19	384-L1700-03	256.79	23076-35-9	hydrochloride	Adrenergic Receptor	Xylazine HCl is α2 class of adrenergic receptor agonist.	C1(=CC=C(C(=C1C)NC2SCCCN=2)C).Cl	194	http://www.selleckchem.com/products/Xylazine(Rompun).html	Neuronal Signaling
65	S2637	TAK-875	B20	B	20	384-L1700-03	533.63	1374598-80-7	hydrate	GPR	TAK-875 is a selective GPR40 agonist with EC50 of 14 nM, 400-fold more potent than oleic acid.	C1(=C(C=C(C=C1)COC2=CC=C3C(=C2)OC[C@H]3CC(=O)O)C4=C(C=C(C=C4C)OCCCS(=O)(C)=O)C).O.C5=C(C=C(C=C5)COC6=CC=C7C(=C6)OC[C@H]7CC(=O)O)C8=C(C=C(C=C8C)OCCCS(=O)(C)=O)C	187	http://www.selleckchem.com/products/tak-875.html	Endocrinology & Hormones
73	S2527	Methacycline HCl	B21	B	21	384-L1700-03	478.88	3963-95-9	hydrochloride	Others	Methacycline HCl is a tetracycline antibiotic.	C1(=CC(=C2C(=C1)C([C@@]3(C(=C([C@]4([C@@]([C@@H]3O)([C@H](C(=C(C4=O)C(N)=O)O)N(C)C)[H])O)O)C2=O)[H])=C)O).Cl	10	http://www.selleckchem.com/products/Methacycline-hydrochloride-Physiomycine.html	Others
73	S2662	ICG-001	B22	B	22	384-L1700-03	548.63	780757-88-2	free base	Wnt/beta-catenin	ICG-001 antagonizes Wnt/β-catenin/TCF-mediated transcription and specifically binds to element-binding protein (CBP) with IC50 of 3 μM, but is not the related transcriptional coactivator p300.	C1=CC=C(C=C1)CNC(N2[C@@]3(N(C(CC2)=O)[C@@H](C(N(C3)CC4=CC=CC5=C4C=CC=C5)=O)CC6=CC=C(C=C6)O)[H])=O	182	http://www.selleckchem.com/products/icg-001.html	Stem Cells & Wnt
2	S2161	RAF265 (CHIR-265)	C03	C	03	384-L1700-03	518.41	927880-90-8	free base	VEGFR,Raf	RAF265 (CHIR-265) is a potent selective inhibitor of C-Raf/B-Raf/B-Raf V600E with IC50 of 3-60 nM, and exhibits potent inhibition on VEGFR2 phosphorylation with EC50 of 30 nM. Phase 2.	C12=C(C=CC(=C1)OC3=CC=NC(=C3)C4NC(=CN=4)C(F)(F)F)N(C(=N2)NC5=CC=C(C=C5)C(F)(F)F)C	192	http://www.selleckchem.com/products/RAF265(CHIR-265).html	MAPK
2	S2303	Gossypol	C04	C	04	384-L1700-03	518.56	303-45-7	free base	Others	Gossypol is a polyphenolic aldehyde that permeates cells and acts as an inhibitor for several dehydrogenase enzymes.	C1(=C(C(=C(C2=C1C(=C(C(=C2)C)C3=C(C4=C(C=C3C)C(=C(C(=C4C=O)O)O)C(C)C)O)O)C(C)C)O)O)C=O	10	http://www.selleckchem.com/products/Gossypol.html	Others
10	S2178	AG-14361	C05	C	05	384-L1700-03	320.39	328543-09-5	free base	PARP	AG14361 is a potent inhibitor of PARP1 with Ki of <5 nM. It is at least 1000-fold more potent than the benzamides.	C12=C3C=CC=C1N=C(N2CCNC3=O)C4=CC=C(C=C4)CN(C)C	37	http://www.selleckchem.com/products/AG14361.html	DNA Damage
10	S2313	Indole-3-carbinol	C06	C	06	384-L1700-03	147.18	700-06-1	free base	Others	Indole-3-carbinol is produced by the breakdown of the glucosinolate glucobrassicin, which can be found at relatively high levels in cruciferous vegetables.	C1=CC=CC2=C1C(=CN2)CO	197	http://www.selleckchem.com/products/Indole-3-carbinol.html	Others
18	S2192	AZD8931 (Sapitinib)	C07	C	07	384-L1700-03	473.93	848942-61-0	free base	HER2,EGFR	AZD8931 is a reversible, ATP competitive inhibitor of EGFR, ErbB2 and ErbB3 with IC50 of 4 nM, 3 nM and 4 nM, more potent than Gefitinib or Lapatinib against NSCLC cell, 100-fold more selective for the ErbB family than MNK1 and Flt. Phase 1/2.	C1(=C(C=C2C(=C1)C(=NC=N2)NC3=C(F)C(=CC=C3)Cl)OC)OC4CCN(CC4)CC(NC)=O	84	http://www.selleckchem.com/products/AZD8931.html	Protein Tyrosine Kinase
18	S2323	Methyl-Hesperidin	C08	C	08	384-L1700-03	642.6	11013-97-1	free base	Others	Methyl Hesperidin is a flavanone glycoside (flavonoid) (C28H34O15) found abundantly in citrus fruits. Its aglycone form is called hesperetin.	[C@H]1([C@H]([C@H]([C@@H](O[C@@H]1C)OC[C@@H]2[C@H]([C@@H]([C@H]([C@@H](O2)OC3=CC(=C4C(=C3)O[C@@H](CC4=O)C5=CC=C(C(=C5)O)OC)O)O)O)O)O)O)O.CO	10	http://www.selleckchem.com/products/Methyl-Hesperidin.html	Others
26	S2205	OSI-420	C09	C	09	384-L1700-03	415.87	183320-51-6	hydrochloride	EGFR	OSI-420 is the active metabolite of Erlotinib (EGFR inhibitor with IC50 of 2 nM).	C1(=C(C=CC=C1NC2=NC=NC3=C2C=C(C(=C3)OCCOC)OCCO)C#C).Cl	199	http://www.selleckchem.com/products/OSI-420-Desmethyl-Erlotinib,CP-473420.html	Protein Tyrosine Kinase
26	S2334	Oleanolic Acid	C10	C	10	384-L1700-03	456.7	508-02-1	free base	Others	Oleanolic Acid is a non-toxic, hepatoprotective triterpenoid found in Phytolacca Americana, which exerts antitumor and antiviral properties.	C1[C@@H](C([C@]2([C@](C1)([C@]3([C@@](CC2)([C@]4(C(=CC3)[C@@]5(C(CC4)[C@@H](CC(C5)(C)C)C(=O)O)[H])C)C)[H])C)[H])(C)C)O	45	http://www.selleckchem.com/products/Oleanolic-Acid(Caryophyllin).html	Others
34	S2219	CYT387	C11	C	11	384-L1700-03	414.46	1056634-68-4	free base	JAK	CYT387 is an ATP-competitive inhibitor of JAK1/JAK2 with IC50 of 11 nM/18 nM, ~10-fold selectivity versus JAK3. Phase 1/2.	C1=C(C=CC(=C1)NC2=NC=CC(=N2)C3=CC=C(C=C3)C(NCC#N)=O)N4CCOCC4	200	http://www.selleckchem.com/products/Cyt387.html	JAK/STAT
34	S2343	Phlorizin	C12	C	12	384-L1700-03	436.41	60-81-1	free base	Others	Phlorizin is a dihydrochalcone found in the bark of pear (Pyrus communis), apple, cherry and other fruit trees.	C1(=CC(=CC(=C1C(CCC2=CC=C(C=C2)O)=O)O[C@@H]3O[C@@H]([C@H]([C@@H]([C@@H]3O)O)O)CO)O)O	199	http://www.selleckchem.com/products/Phlorizin(Phloridzin).html	Others
42	S2229	Eltrombopag	C13	C	13	384-L1700-03	442.47	496775-61-2	free base	Others	Eltrombopag is a member of the biarylhydrazone class, which is a nonpeptide agonist of the thrombopoietin receptor (TpoR).	C1=C(C(=C(C=C1)C2=CC=CC(=C2)C(O)=O)O)N/N=C3/C(N(N=C3C)C4=CC=C(C(=C4)C)C)=O	201	http://www.selleckchem.com/products/Eltrombopag-SB-497115-GR.html	Others
42	S2355	Sclareolide	C14	C	14	384-L1700-03	250.38	564-20-5	free base	Others	Sclareolide(Norambreinolide) is a sesquiterpene lactone natural product derived from various plant sources including Salvia sclarea, Salvia yosgadensis, and cigar tobacco.	[C@@]12([C@@](CC[C@@]3([C@]1(CCCC3(C)C)C)[H])(OC(C2)=O)C)[H]	10	http://www.selleckchem.com/products/Sclareolide(Norambreinolide).html	Others
50	S2240	Fesoterodine Fumarate	C15	C	15	384-L1700-03	527.65	286930-03-8	fumarate	AChR	Fesoterodine fumarate (Toviaz) is an antimuscarinic agent and is rapidly de-esterified to its active metabolite 5-hydroxymethyl tolterodine that is a muscarinic receptor antagonist.	C1(=C(C=CC=C1)[C@@H](CCN(C(C)C)C(C)C)C2=C(C=CC(=C2)CO)OC(C(C)C)=O).C(=C/C(O)=O)/C(O)=O	200	http://www.selleckchem.com/products/Fesoterodine-fumarate-Toviaz.html	Neuronal Signaling
50	S2365	Tanshinone IIA	C16	C	16	384-L1700-03	294.34	568-72-9	free base	Others	Tanshinone IIA(Tanshinone B) is the most abundant diterpene quinone in Danshen, Salviae miltiorrhizae Radix, a widely prescribed traditional herbal medicine that is used to treat cardiovascular and inflammatory diseases.	C1CC(C2=C(C1)C3=C(C=C2)C4=C(C(C3=O)=O)C(=CO4)C)(C)C	16	http://www.selleckchem.com/products/Tanshinone-IIA(Tanshinone-B).html	Others
58	S2256	4-Methylumbelliferone (4-MU)	C17	C	17	384-L1700-03	176.17	90-33-5	free base	Others	4-Methylumbelliferone is a hyaluronic acid (HA) synthesis inhibitor with an IC50 of 0.4 mM.	C1=C(C=CC2=C1OC(C=C2C)=O)O	198	http://www.selleckchem.com/products/4-Methylumbelliferone(4-MU).html	Others
58	S2374	5-hydroxytryptophan (5-HTP)	C18	C	18	384-L1700-03	220.22	56-69-9	free base	Others	5-Hydroxytryptophan (5-HTP), also known as oxitriptan (INN), is a naturally occurring amino acid and chemical precursor for the treatment of depression.	C1(=CC=C2C(=C1)C(=CN2)CC(C(O)=O)N)O	199	http://www.selleckchem.com/products/5-hydroxytryptophan(5-HTP).html	Others
66	S2265	Artesunate	C19	C	19	384-L1700-03	384.42	88495-63-0	free base	Others	Artesunate is a part of the artemisinin group of agents with an IC50 of < 5 μM for small cell lung carcinoma cell line H69.	[C@]12([C@]34[C@@](CC[C@@]1(C)[H])([C@]([C@H](O[C@@](O[C@@](CC2)(OO3)C)4[H])OC(=O)CCC(O)=O)([H])C)[H])[H]	200	http://www.selleckchem.com/products/Artesunate.html	Others
66	S2383	Gastrodin	C20	C	20	384-L1700-03	286.28	62499-27-8	free base	Others	Gastrodin, an anti-inflammatory polyphenol extracted from Chinese natural herbal Gastrodia elata Blume., benefits neurodegenerative diseases.	[C@@H]1([C@@H]([C@H]([C@@H](O[C@H]1CO)OC2=CC=C(C=C2)CO)O)O)O	174	http://www.selleckchem.com/products/Gastrodin(Gastrodine).html	Others
74	S2277	Caffeic Acid	C21	C	21	384-L1700-03	180.16	331-39-5	free base	Others	Caffeic acid is a hydroxycinnamic acid, a naturally occurring organic compound.	C1=C(C(=CC(=C1)/C=C/C(O)=O)O)O	10	http://www.selleckchem.com/products/Caffeic-acid.html	Others
74	S2392	Sesamin	C22	C	22	384-L1700-03	354.35	607-80-7	free base	Others	Sesamin, a lignan isolated from the bark of Fagara plants and from sesame oil, exhibits various health benefits.	C12=C(C=CC(=C1)[C@H]3OC[C@]4([C@]3(CO[C@@H]4C5=CC6=C(C=C5)OCO6)[H])[H])OCO2	200	http://www.selleckchem.com/products/Sesamin(Fagarol).html	Others
2	S2411	Geniposide	D03	D	03	384-L1700-03	388.37	24512-63-8	free base	Others	Geniposide is an iridoid glycoside isolated from the fruit of Gardenia jasminoides Ellis.	[C@H]1([C@H](O[C@H]([C@@H]([C@@H]1O)O)O[C@@H]2OC=C([C@@]3([C@@]2(C(=CC3)CO)[H])[H])C(=O)OC)CO)O	10	http://www.selleckchem.com/products/geniposide.html	Others
2	S2549	Trospium chloride	D04	D	04	384-L1700-03	427.96	10405-02-4	chloride	AChR	Trospium chloride (Sanctura) is a competitive muscarinic cholinergic receptor antagonist.	[Cl-].[C@]12(CC[C@@]([N+]31CCCC3)(C[C@@H](C2)OC(C(C4=CC=CC=C4)(C5=CC=CC=C5)O)=O)[H])[H]	95	http://www.selleckchem.com/products/Trospium-chloride-Sanctura.html	Neuronal Signaling
10	S2437	Rotundine	D05	D	05	384-L1700-03	355.43	483-14-7	free base	Dopamine Receptor	Rotundine (L-tetrahydropalmatine, L-THP) is a selective dopamine D1 receptor antagonist with IC50 of 166 nM.	C1=C(C(=C2C(=C1)C[C@@]3(N(C2)CCC4=C3C=C(C(=C4)OC)OC)[H])OC)OC	10	http://www.selleckchem.com/products/rotundine.html	Neuronal Signaling
10	S2557	Terbinafine HCl	D06	D	06	384-L1700-03	327.89	78628-80-5	hydrochloride	Others	Terbinafine hydrochloride (Lamisil) is a hydrochloride salt of terbinafine that is a synthetic allylamine antifungal and a squalene epoxidase inhibitor with an IC50 of 30 nM for Candida albicans.	C1(=CC2=C(C=C1)C(=CC=C2)CN(C/C=C/C#CC(C)(C)C)C).Cl	201	www.selleckchem.com/products/Terbinafine-hydrochloride(Zabel).html	Others
18	S2451	Amantadine HCl	D07	D	07	384-L1700-03	187.7	665-66-7	hydrochloride	Dopamine Receptor	Amantadine HCl is used to treat or prevent infections of the respiratory tract caused by a certain virus.	C12(CC3CC(C1)CC(C2)(C3)N).Cl	202	selleckchem.com/products/Amantadine-hydrochloride(Symmetrel).html	Neuronal Signaling
18	S2573	Tetracaine HCl	D08	D	08	384-L1700-03	300.82	136-47-0	hydrochloride	Calcium Channel	Tetracaine hydrochloride (Pontocaine) is a hydrochloride salt form of tetracaine which is a potent local anaesthetic and a channel function allosteric inhibitor.	C1(=C(C=CC(=C1)C(OCCN(C)C)=O)NCCCC).Cl	199	http://www.selleckchem.com/products/tetracaine-hydrochloride-pontocaine.html	Transmembrane Transporters
26	S2459	Clozapine	D09	D	09	384-L1700-03	326.82	5786-21-0	free base	5-HT Receptor	Clozapine (Clozaril) is a potent 5-HT1C receptor antagonist with an IC50 of 110 nM for 5-HT-stimulated phosphoinositide hydrolysis.	N1C2=C(C(=NC3=C1C=CC(=C3)Cl)N4CCN(CC4)C)C=CC=C2	198	http://www.selleckchem.com/products/Clozapine(Clozaril).html	Neuronal Signaling
26	S2585	Brompheniramine hydrogen maleate	D10	D	10	384-L1700-03	435.31	980-71-2	maleate	Histamine Receptor	Brompheniramine hydrogen maleate is a histamine H1 receptors antagonist.	C1(C(CCN(C)C)C2=CC=CC=N2)(=CC=C(C=C1)Br).OC(/C=C\C(O)=O)=O	10	http://www.selleckchem.com/products/brompheniramine.html	Neuronal Signaling
34	S2473	Hexestrol	D11	D	11	384-L1700-03	270.37	84-16-2	free base	Estrogen/progestogen Receptor	Hexestrol binds to ERα and ERβ with EC50 of 0.07 nM and 0.175 nM, respectively.	C1=CC(=CC=C1O)[C@@H]([C@H](CC)C2=CC=C(C=C2)O)CC	155	http://www.selleckchem.com/products/Hexestrol(Bibenzyl).html	Endocrinology & Hormones
34	S2601	Gliclazide	D12	D	12	384-L1700-03	323.41	21187-98-4	free base	Potassium Channel	Gliclazide (Diamicron) is a whole-cell beta-cell ATP-sensitive potassium currents blocker with an IC50 of 184 ± 30 nM.	C1=C(C=CC(=C1)S(NC(NN2CC3C(C2)CCC3)=O)(=O)=O)C	200	http://www.selleckchem.com/products/gliclazide-diamicron.html	Transmembrane Transporters
42	S2485	Mitoxantrone HCl	D13	D	13	384-L1700-03	517.4	70476-82-3	hydrochloride	Others	Mitoxantrone HCl is a classic folic acid antagonist.	C1(=CC(=C2C(=C1O)C(C3=C(C2=O)C(=CC=C3NCCNCCO)NCCNCCO)=O)O).Cl.Cl	172	http://www.selleckchem.com/products/Mitoxantrone.html	Others
42	S2610	Lonidamine	D14	D	14	384-L1700-03	321.16	50264-69-2	free base	Others	Lonidamine is an orally administered small molecule hexokinase inactivator with an IC50 of 0.85 mM.	C1=CC=C2C(=C1)N(N=C2C(O)=O)CC3=C(C=C(C=C3)Cl)Cl	199	http://www.selleckchem.com/products/lonidamine.html	Others
50	S2495	Oxymetazoline HCl	D15	D	15	384-L1700-03	296.84	2315-02-8	hydrochloride	Adrenergic Receptor	Oxymetazoline hydrochloride is an α1 and α2 adrenergic receptor agonist.	C1(=C(C(=C(C(=C1)C)CC2NCCN=2)C)O)C(C)(C)C.Cl	198	http://www.selleckchem.com/products/Oxymetazoline-hydrochloride.html	Neuronal Signaling
50	S2621	AZD5438	D16	D	16	384-L1700-03	371.46	602306-29-6	free base	CDK	AZD5438 is a potent inhibitor of CDK1/2/9 with IC50 of 16 nM/6 nM/20 nM. It is less potent to CDK5/6 and also inhibits GSK3β. Phase 1.	C1=C(C=CC(=C1)NC2=NC=CC(=N2)C3=CN=C(N3C(C)C)C)S(=O)(C)=O	199	http://www.selleckchem.com/products/AZD5438.html	Cell Cycle
58	S2504	Ribavirin	D17	D	17	384-L1700-03	244.209	36791-04-5	free base	Others	Ribavirin (Copegus) is an anti-viral agent indicated for severe RSV infection (individually), hepatitis C infection and other viral infections.	O1[C@@H]([C@H]([C@H]([C@H]1N2C=NC(=N2)C(N)=O)O)O)CO	200	http://www.selleckchem.com/products/Ribavirin(Copegus).html	Others
58	S2630	GW3965 HCl	D18	D	18	384-L1700-03	618.51	405911-17-3	hydrochloride	Liver X Receptor	GW3965 is a potent, selective LXRagonist for hLXRα and hLXRβ with EC50 of 190 and 30 nM, respectively.	C1(=C(C=C(C=C1)OCCCN(CC2=CC=CC(=C2Cl)C(F)(F)F)CC(C3=CC=CC=C3)C4=CC=CC=C4)CC(=O)O).Cl	200	http://www.selleckchem.com/products/gw3965.html	Others
66	S2517	Maprotiline HCl	D19	D	19	384-L1700-03	313.86	10347-81-6	hydrochloride	Adrenergic Receptor	Maprotiline hydrochloride (Deprilept, Ludiomil, Psymion) is a selective noradrenalin re-uptake inhibitor and a tetracyclic antidepressant.	C1(=CC=C2C(=C1)C3(C4=C(C2CC3)C=CC=C4)CCCNC).Cl	200	http://www.selleckchem.com/products/Maprotiline-hydrochloride.html	Neuronal Signaling
66	S2638	NU7441 (KU-57788)	D20	D	20	384-L1700-03	413.49	503468-95-9	free base	DNA-PK,PI3K	NU7441 is a highly potent and selective DNA-PK inhibitor with IC50 of 14 nM and also inhibits PI3K with IC50 of 5 μM.	C1=C(OC2=C(C1=O)C=CC=C2C3=CC=CC4=C3SC5=C4C=CC=C5)N6CCOCC6	10	http://www.selleckchem.com/products/nu7441.html	DNA Damage
74	S2528	Ciclopirox	D21	D	21	384-L1700-03	207.27	29342-05-0	free base	Others	Ciclopirox (Penlac) is a synthetic antifungal agent.	C1CCCC(C1)C2N(C(C=C(C=2)C)=O)O	202	http://www.selleckchem.com/products/Ciclopirox-Penlac.html	Others
74	S2663	WAY-100635 Maleate	D22	D	22	384-L1700-03	538.64	1092679-51-0	hydrochloride	5-HT Receptor	WAY 100635 is a potent and selective 5-HT1A receptor agonist with pIC50 of 8.87, exhibits >100-fold selectivity against other 5-HT receptor subtypes and major neurotransmitter receptors.	C1(N2CCN(CC2)CCN(C3=CC=CC=N3)C(C4CCCCC4)=O)(=C(C=CC=C1)OC).Cl.Cl.Cl	157	http://www.selleckchem.com/products/way-100635.html	Neuronal Signaling
3	S2162	AZD1480	E03	E	03	384-L1700-03	348.77	935666-88-9	Free Base	JAK	AZD1480 is a novel ATP-competitive JAK2 inhibitor with IC50 of 0.26 nM, selectivity against JAK3 and Tyk2, and to a smaller extent against JAK1. Phase 1.	C1(=NC(=NC=C1Cl)N[C@H](C2=NC=C(C=N2)F)C)NC3=NNC(=C3)C	69	www.selleckchem.com/products/AZD1480.html	JAK/STAT
3	S2304	Gramine	E04	E	04	384-L1700-03	174.24	87-52-5	free base	Others	Gramine is a naturally occurring indole alkaloid present in several plant species.	C12=C(C=CC=C1)NC=C2CN(C)C	200	http://www.selleckchem.com/products/Gramine.html	Others
11	S2179	LY2784544	E05	E	05	384-L1700-03	469.94	1229236-86-5	free base	JAK	LY2784544 is a potent JAK2 inhibitor with IC50 of 3 nM, effective in JAK2V617F, 8- and 20-fold selective versus JAK1 and JAK3. Phase 2.	C1C(=NN2C(C=1CN3CCOCC3)=NC(=C2CC4=CC=C(C=C4F)Cl)C)NC5NN=C(C=5)C	200	http://www.selleckchem.com/products/LY2784544.html	JAK/STAT
11	S2314	Kaempferol	E06	E	06	384-L1700-03	286.23	520-18-3	free base	Others	Kaempferol is a natural flavonol, a type of flavonoid, that has been isolated from plant sources.	C1(=CC(=C2C(=C1)OC(=C(C2=O)O)C3=CC=C(C=C3)O)O)O	199	http://www.selleckchem.com/products/Kaempferol.html	Others
19	S2193	GSK461364	E07	E	07	384-L1700-03	543.6	929095-18-1	free base	PLK	GSK461364 inhibits purified Plk1 with Ki of 2.2 nM. It is more than 1000-fold selective against Plk2/3. Phase 1.	C1N(CCN(C1)CC2=CC3=C(C=C2)N=CN3C4=CC(=C(S4)C(=O)N)O[C@H](C)C5=CC=CC=C5C(F)(F)F)C	18	http://www.selleckchem.com/products/GSK461364.html	Cell Cycle
19	S2325	Morin Hydrate	E08	E	08	384-L1700-03	320.25	6202-27-3	hydrate	Others	Morin hydrate(Aurantica) is a flavonoid isolated from Maclura pomifera (Osage orange), Maclura tinctoria (old fustic) and from leaves of Psidium guajava (common guava).	C1(=CC(=C2C(=C1)OC(=C(C2=O)O)C3=CC=C(C=C3O)O)O)O.O	199	http://www.selleckchem.com/products/Morin-hydrate(Aurantica).html	Others
27	S2207	PIK-293	E09	E	09	384-L1700-03	397.43	900185-01-5	free base	PI3K	PIK-293 is a PI3K inhibitor, mostly for PI3Kδ with IC50 of 0.24 μM, 500-, 100- and 50-fold less potent to PI3Kα/β/γ, respectively.	C1(N(C(C2=C(N=1)C=CC=C2C)=O)C3=C(C=CC=C3)C)CN4N=CC5=C4N=CN=C5N	201	http://www.selleckchem.com/products/PIK-293.html	PI3K/Akt/mTOR
27	S2335	Oridonin	E10	E	10	384-L1700-03	364.43	28957-04-2	free base	Others	Oridonin, a diterpenoid purified from Rabdosia rubescens, is an antitumor agent.	[C@]12(C(CC[C@@H]([C@@]31C4[C@]5(C(C([C@@]([C@H]5O)(CC4)[H])=C)=O)[C@]([C@@H]2O)(O)OC3)O)(C)C)[H]	200	http://www.selleckchem.com/products/Oridonin(Isodonol).html	Others
35	S2220	SB590885	E11	E	11	384-L1700-03	453.54	405554-55-4	free base	Raf	SB590885 is a potent B-Raf inhibitor with Ki of 0.16 nM, 11-fold greater selectivity for B-Raf over c-Raf, no inhibition to other human kinases.	N1C(=C(NC=1C2=CC=C(C=C2)OCCN(C)C)C3=CC=C4C(=C3)CCC/4=N/O)C5=CC=NC=C5	11	http://www.selleckchem.com/products/SB590885.html	MAPK
35	S2344	Piperine	E12	E	12	384-L1700-03	285.34	94-62-2	free base	Others	Piperine (1-Piperoylpiperidine) is the alkaloid responsible for the pungency of black pepper and long pepper, which has also been used in some forms of traditional medicine and as an insecticide.	C1CN(CCC1)C(/C=C/C=C/C2=CC3=C(C=C2)OCO3)=O	199	http://www.selleckchem.com/products/Piperine(1-Piperoylpiperidine).html	Others
43	S2230	LY2157299	E13	E	13	384-L1700-03	369.42	700874-72-2	free base	TGF-beta/Smad	LY2157299 is a potent TGFβ receptor I (TβRI) inhibitor with IC50 of 56 nM. Phase 2.	C1(=CC=CC(=N1)C2=NN3C(=C(C4=CC=NC5=C4C=C(C=C5)C(=O)N)2)CCC3)C	200	http://www.selleckchem.com/products/ly2157299.html	TGF-beta/Smad
43	S2356	Shikimic Acid	E14	E	14	384-L1700-03	174.15	138-59-0	free base	Others	Shikimic acid(Shikimate), more commonly known as its anionic form shikimate, is an important biochemical intermediate in plants and microorganisms.	C1C(C([C@@H](CC=1C(=O)O)O)O)O	10	http://www.selleckchem.com/products/Shikimic-acid(Shikimate).html	Others
51	S2243	Degrasyn (WP1130)	E15	E	15	384-L1700-03	384.27	856243-80-6	free base	DUB,Bcr-Abl	WP1130 (Degrasyn) is a selective deubiquitinase (DUB: USP5, UCH-L1, USP9x, USP14, and UCH37) inhibitor and also suppresses Bcr/Abl, also a JAK2 transducer (without affecting 20S proteasome) and activator of transcription (STAT).	C1(=CC=CC(=N1)/C=C(/C(N[C@H](C2=CC=CC=C2)CCC)=O)C#N)Br	200	http://www.selleckchem.com/products/WP1130.html	Angiogenesis
51	S2366	Taxifolin (Dihydroquercetin)	E16	E	16	384-L1700-03	304.25	480-18-2	free base	Others	Taxifolin is a flavonoid in many plants such as Taxus chinensis, Siberian larch, Cedrus deodara and so on.	C1(=CC(=C2C(=C1)O[C@@H]([C@H](C2=O)O)C3=CC(=C(C=C3)O)O)O)O	10	http://www.selleckchem.com/products/Taxifolin(Dihydroquercetin).html	Others
59	S2258	Esculin	E17	E	17	384-L1700-03	340.28	531-75-9	free base	Others	Esculin is a glucoside found in horse chestnuts.	C1(=C(C=C2C(=C1)OC(C=C2)=O)O[C@@H]3O[C@@H]([C@H]([C@@H]([C@@H]3O)O)O)CO)O	199	http://www.selleckchem.com/products/Aesculin(Esculin).html	Others
59	S2375	Aloin	E18	E	18	384-L1700-03	418.39	1415-73-2	free base	Others	Aloin, a natural anthracycline from Aloe vera, is a tyrosinase inhibitor.	[C@@H]1(O[C@]([C@@H]([C@H]([C@H]1O)O)O)([C@]2(C3=C(C(C4=C2C=C(C=C4O)CO)=O)C(=CC=C3)O)[H])[H])CO	200	http://www.selleckchem.com/products/Aloin(Barbaloin).html	Others
67	S2266	Asiatic Acid	E19	E	19	384-L1700-03	488.7	464-92-6	free base	p38 MAPK	Asiatic acid is the aglycone of asiaticoside isolated from the plant Centella asiatica, commonly used in wound healing.	[C@@H]1([C@@H]([C@]([C@]2([C@](C1)([C@]3([C@@](CC2)([C@]4(C(=CC3)[C@@]5([C@@](CC4)(CC[C@H]([C@H]5C)C)C(O)=O)[H])C)C)[H])C)[H])(CO)C)O)O	200	http://www.selleckchem.com/products/Asiatic-acid.html	MAPK
67	S2384	Hematoxylin	E20	E	20	384-L1700-03	302.28	517-28-2	free base	Others	Hematoxylin (Hydroxybrazilin) is a compound that forms strongly colored complexes with certain metal ions, notably Fe(III) and Al(III) salts and a kind of stain in histology.	[C@]12([C@@](C3=C(OC1)C(=C(C=C3)O)O)(C4=C(C2)C=C(C(=C4)O)O)[H])O	201	http://www.selleckchem.com/products/Hematoxylin(Hydroxybrazilin).html	Others
75	S2280	Chlorogenic Acid	E21	E	21	384-L1700-03	354.31	327-97-9	free base	Others	Chlorogenic acid is a hydroxycinnamic acid and a member of a family of naturally occurring organic compounds.	C1[C@H]([C@H]([C@@H](C[C@]1(C(=O)O)O)OC(/C=C/C2=CC(=C(C=C2)O)O)=O)O)O	10	http://www.selleckchem.com/products/Chlorogenic-acid.html	Others
75	S2393	Sorbitol	E22	E	22	384-L1700-03	182.17	50-70-4	free base	Others	Sorbitol is a sugar alcohol and a sugar substitute.	OC[C@H]([C@H]([C@@H]([C@H](CO)O)O)O)O	197	http://www.selleckchem.com/products/Sorbitol(Glucitol).html	Others
3	S2412	Genipin	F03	F	03	384-L1700-03	226.23	6902-77-8	free base	Others	Genipin is an active aglycone derived from an iridoid glycoside called geniposide, which is found in the fruit of Gardenia jasminoides Ellis.	O1C=C([C@@]2([C@]([C@H]1O)(C(=CC2)CO)[H])[H])C(=O)OC	198	http://www.selleckchem.com/products/genipin.html	Others
3	S2550	Tolterodine tartrate	F04	F	04	384-L1700-03	475.57	124937-52-6	tartrate	AChR	Tolterodine tartrate (Detrol LA) is a tartrate salt of tolterodine that is a competitive muscarinic receptor antagonist.	C1(=C(C=C(C(=C1)O)[C@@H](C2=CC=CC=C2)CCN(C(C)C)C(C)C)C).O=C(O)[C@@H]([C@H](C(O)=O)O)O	199	http://www.selleckchem.com/products/Tolterodine-tartrate-Detrol-LA.html	Neuronal Signaling
11	S2438	Synephrine HCl	F05	F	05	384-L1700-03	203.67	5985-28-4	hydrochloride	Adrenergic Receptor	SynephrineHCl (Oxedrine, p-Synephrine) is a sympathomimetic α-adrenergic receptor (AR) agonist.	C1(=C(C=CC(=C1)C(CNC)O)O).Cl	68	http://www.selleckchem.com/products/synephrine-hcl.html	Neuronal Signaling
11	S2559	Cortisone acetate	F06	F	06	384-L1700-03	402.48	50-04-4	free base	Others	Cortisone acetate (Cortone) is an acetate salt form of cortisone that is a steroid hormone and a glucocorticoid.	C1C(C=C2[C@](C1)([C@]3([C@@](CC2)([C@]4([C@](CC3=O)([C@@](CC4)(C(COC(C)=O)=O)O)C)[H])[H])[H])C)=O	17	http://www.selleckchem.com/products/Cortisone-acetate-Cortone.html	Others
19	S2452	Amfebutamone HCl	F07	F	07	384-L1700-03	276.2	31677-93-7	hydrochloride	Dopamine Receptor,AChR	Amfebutamone HCl is a selective norepinephrine-dopamine reuptake inhibitor with IC50 of 6.5 and 3.4μM for the reuptake of dopamine and norepinephrine, respectively	C1(=CC=CC(=C1)Cl)C(=O)C(C)NC(C)(C)C.Cl	28	http://www.selleckchem.com/products/Amfebutamone-hydrochloride(Bupropion).html	Neuronal Signaling
19	S2574	Tetracycline HCl	F08	F	08	384-L1700-03	480.9	64-75-5	hydrochloride	Others	Tetracycline hydrochloride is a hydrochloride salt of tetracycline that is a broad-spectrum polyketide antibiotic.	C1(=CC=C2C(=C1O)C(C3=C([C@]4([C@@](C[C@@]([C@]2(C)O)([H])3)([C@@](C(=C(C4=O)C(N)=O)O)(N(C)C)[H])[H])O)O)=O).Cl	10	http://www.selleckchem.com/products/tetracycline-hydrochloride.html	Others
27	S2460	Pramipexole	F09	F	09	384-L1700-03	211.33	104632-26-0	free base	Dopamine Receptor	Pramipexole is a partial/full D2S, D2L, D3, D4 receptor agonist with a Ki of 3.9, 2.2, 0.5 and 5.1 nM for D2S, D2L, D3, D4 receptor, respectively.	[C@@H]1(CCC2=C(C1)SC(=N2)N)NCCC	198	http://www.selleckchem.com/products/Pramipexole-Mirapex.html	Neuronal Signaling
27	S2586	Dimethyl Fumarate	F10	F	10	384-L1700-03	144.13	624-49-7	fumarate	Others	Dimethyl fumarate is a promising novel oral therapeutic option shown to reduce disease activity and progression in patients with relapsing-remitting multiple sclerosis.	C(/C=C/C(=O)OC)(=O)OC	201	http://www.selleckchem.com/products/dimethyl-Fumarate.html	Others
35	S2475	Imatinib (STI571)	F11	F	11	384-L1700-03	493.6	152459-95-5	free base	PDGFR	Imatinib is a multi-target inhibitor of v-Abl, c-Kit and PDGFR with IC50 of 0.6 μM, 0.1 μM and 0.1 μM, respectively.	N1=C(N=C(C=C1)C2=CC=CN=C2)NC3=CC(=CC=C3C)NC(=O)C4=CC=C(C=C4)CN5CCN(CC5)C	10	http://www.selleckchem.com/products/Imatinib(STI571).html	Protein Tyrosine Kinase
35	S2602	Acemetacin	F12	F	12	384-L1700-03	415.82	53164-05-9	free base	COX	Acemetacin is a non-steroidal anti-inflammatory drug and a glycolic acid ester of indometacin that is a cyclooxygenase inhibitor.	CC1N(C2=C(C=1CC(OCC(O)=O)=O)C=C(C=C2)OC)C(=O)C3=CC=C(C=C3)Cl	10	http://www.selleckchem.com/products/acemetacin-emflex.html	Neuronal Signaling
43	S2486	Moroxydine HCl	F13	F	13	384-L1700-03	207.66	3160-91-6	hydrochloride	Others	Moroxydine HCl is a synthetic antiviral compound chemically belonging to the series of the heterocyclic biguanidines.	C1(OCCN(C1)C(NC(N)=N)=N).Cl	202	http://www.selleckchem.com/products/Moroxydine-hydrochloride.html	Others
43	S2612	Ribitol	F14	F	14	384-L1700-03	152.15	488-81-3	free base	Others	Ribitol is a crystalline pentose alcohol and is formed by the reduction of ribose which is occurs naturally in the plant Adonis vernalis.	OC[C@H]([C@H]([C@H](CO)O)O)O	203	http://www.selleckchem.com/products/ribitol-adonitol.html	Others
51	S2496	Ozagrel	F15	F	15	384-L1700-03	228.25	82571-53-7	free base	Factor Xa	Ozagrel is a potent and selective thromboxane A2 synthetase inhibitor with an IC50 of 4 nM.	C1=C(C=CC(=C1)/C=C/C(O)=O)CN2C=NC=C2	201	http://www.selleckchem.com/products/Ozagrel.html	Metabolism
51	S2622	PP121	F16	F	16	384-L1700-03	319.36	1092788-83-4	free base	DNA-PK,PDGFR,mTOR	PP-121 is a multi-targeted inhibitor of PDGFR, Hck, mTOR, VEGFR2, Src and Abl with IC50 of 2 nM, 8 nM, 10 nM, 12 nM, 14 nM and 18 nM, also inhibits DNA-PK with IC50 of 60 nM.	C1(=CN=C2C(=C1)C=CN2)C3=NN(C4=C3C(=NC=N4)N)C5CCCC5	200	http://www.selleckchem.com/products/PP121.html	Protein Tyrosine Kinase
59	S2506	Roxithromycin	F17	F	17	384-L1700-03	837.067	80214-83-1	free base	Others	Roxithromycin is a semi-synthetic macrolide antibiotic. It is used to treat respiratory tract, urinary and soft tissue infections.	[C@@]1([C@H](OC([C@@H]([C@@H]([C@@H]([C@H]([C@](C[C@H](C(/[C@@H]([C@H]1O)C)=N\OCOCCOC)C)(C)O)O[C@H]2[C@@H]([C@H](C[C@H](O2)C)N(C)C)O)C)O[C@@H]3O[C@H]([C@@H]([C@](C3)(C)OC)O)C)C)=O)CC)(O)C	199	http://www.selleckchem.com/products/Roxithromycin(Roxl-150).html	Others
59	S2631	URB597	F18	F	18	384-L1700-03	338.4	546141-08-6	free base	FAAH	URB597 is a potent, orally bioavailable FAAH inhibitor with IC50 of 4.6 nM, with no activity on other cannabinoid-related targets.	C1=C(C=C(C=C1)OC(NC2CCCCC2)=O)C3=CC=CC(=C3)C(N)=O	200	http://www.selleckchem.com/products/urb597.html	Metabolism
67	S2519	Naphazoline HCl	F19	F	19	384-L1700-03	246.74	550-99-2	hydrochloride	Adrenergic Receptor	Naphazoline hydrochloride (Naphcon) is an ocular vasoconstrictor and imidazoline derivative sympathomimetic amine.	C12(=CC=CC(=C1C=CC=C2)CC3=NCCN3).Cl	68	http://www.selleckchem.com/products/Naphazoline-hydrochloride-Naphcon.html	Neuronal Signaling
67	S2639	SNX-2112 (PF-04928473)	F20	F	20	384-L1700-03	464.48	908112-43-6	free base	HSP (e.g. HSP90)	SNX-2112 selectively binds to the ATP pocket of HSP90α and HSP90β with Ka of 30 nM and 30 nM, uniformly more potent than 17-AAG.	C1=CC(=CC(=C1C(N)=O)N[C@@H]2CC[C@H](CC2)O)N3N=C(C4=C3CC(CC4=O)(C)C)C(F)(F)F	200	http://www.selleckchem.com/products/snx-2112.html	Cytoskeletal Signaling
75	S2529	Dopamine HCl	F21	F	21	384-L1700-03	189.64	62-31-7	hydrochloride	Dopamine Receptor	Dopamine hydrochloride (Inotropin) is a catecholamine neurotransmitter present in a wide variety of animals,And a dopamine D1-5 receptors agonist.	C1(=C(C=CC(=C1)CCN)O)O.Cl	200	http://www.selleckchem.com/products/Dopamine-hydrochloride-Inotropin.html	Neuronal Signaling
75	S2664	Clinofibrate	F22	F	22	384-L1700-03	468.58	30299-08-2	free base	RAAS	Clinofibrate inhibits hydroxymethylglutaryl coenzyme A reductase (HMGCR) with IC50 of 0.47 mM, is a lipid-lowering agent used for controlling high cholesterol and triacylglyceride levels in the blood.	C1CC(CCC1)(C2=CC=C(C=C2)OC(CC)(C)C(O)=O)C3=CC=C(C=C3)OC(CC)(C)C(=O)O	200	http://www.selleckchem.com/products/clinofibrate.html	Endocrinology & Hormones
4	S2163	PF-4708671	G03	G	03	384-L1700-03	390.41	1255517-76-0	free base	S6 Kinase	PF-4708671 is a cell-permeable inhibitor of p70 ribosomal S6 kinase (S6K1 isoform) with Ki/IC50 of 20 nM/160 nM, 400-fold greater selectivity for S6K1 than S6K2, and 4- and >20-fold selectivity for S6K1 than MSK1 and RSK1/2, respectively. First S6K1-specific inhibitor to be reported.	N1C(=NC2=C1C=CC(=C2)C(F)(F)F)CN3CCN(C4=NC=NC=C4CC)CC3	76	http://www.selleckchem.com/products/pf-4708671.html	PI3K/Akt/mTOR
4	S2306	Gynostemma Extract	G04	G	04	384-L1700-03	917.13	80321-63-7	free base	Others	Gynostemma Extract is a saponins extract derived from the Gynostemma pentaphyllum.	C1[C@@H](C([C@]2([C@](C1)([C@]3([C@@](CC2)([C@]4([C@]([C@@H](C3)O)([C@@H](CC4)[C@](O[C@@H]5O[C@@H]([C@H]([C@@H]([C@@H]5O)O)O)CO[C@@H]6OC[C@H]([C@@H]([C@@H]6O)O)O)(C)CCC=C(C)C)[H])C)C)[H])C)[H])(C)C)O[C@@H]7O[C@@H]([C@H]([C@@H]([C@@H]7O)O)O)CO	206	http://www.selleckchem.com/products/Gynostemma-Extract.html	Others
12	S2180	MLN2238	G05	G	05	384-L1700-03	361.03	1072833-77-2	free base	Proteasome	MLN2238 inhibits the chymotrypsin-like proteolytic (β5) site of the 20S proteasome with IC50 and Ki of 3.4 nM and 0.93 nM, respectively, also inhibits the caspase-like (β1) and trypsin-like (β2) proteolytic sites, with IC50 of 31 and 3500 nM.	C1=CC(=CC(=C1Cl)C(NCC(N[C@H](B(O)O)CC(C)C)=O)=O)Cl	199	http://www.selleckchem.com/products/MLN-2238.html	Proteases
12	S2316	Kinetin	G06	G	06	384-L1700-03	215.21	525-79-1	free base	Others	Kinetin is a type of cytokinin, a class of plant hormone that promotes cell division.	C12=C(C(=NC=N1)NCC3OC=CC=3)NC=N2	199	http://www.selleckchem.com/products/Kinetin(6-Furfuryladenine).html	Others
20	S2194	R406	G07	G	07	384-L1700-03	628.63	841290-81-1	besylate	Syk,FLT3	R406 is a potent Syk inhibitor with IC50 of 41 nM, strongly inhibits Syk but not Lyn, 5-fold less potent to Flt3. Phase 2.	C1(=C(C=C(C=C1OC)NC2=NC(=C(C=N2)F)NC3=NC4=C(C=C3)OC(C(N4)=O)(C)C)OC)OC.C5=CC=CC(=C5)S(O)(=O)=O	200	http://www.selleckchem.com/products/R406.html	Angiogenesis
20	S2326	Myricetin	G08	G	08	384-L1700-03	318.24	529-44-2	free base	Others	Myricetin(Cannabiscetin) is a flavonoid found in many grapes, berries, fruits, vegetables, herbs, as well as other plants, which has antioxidant and anti tumor properties.	C1(=CC(=C2C(=C1)OC(=C(C2=O)O)C3=CC(=C(C(=C3)O)O)O)O)O	201	http://www.selleckchem.com/products/Myricetin(Cannabiscetin).html	Others
28	S2208	Formestane	G09	G	09	384-L1700-03	302.41	566-48-3	free base	Aromatase	Formestane(Lentaron(R)) is a second generation selective aromatase inhibitor with an IC50 of 80 nM.	C1C(C(=C2[C@](C1)([C@]3([C@@](CC2)([C@]4([C@](CC3)(C(CC4)=O)C)[H])[H])[H])C)O)=O	201	http://www.selleckchem.com/products/Formestane.html	Endocrinology & Hormones
28	S2336	Orotic acid (6-Carboxyuracil)	G10	G	10	384-L1700-03	156.1	65-86-1	free base	Others	Orotic acid(6-Carboxyuracil) is a heterocyclic compound and an acid.	C1=C(NC(NC1=O)=O)C(O)=O	10	http://www.selleckchem.com/products/Orotic-acid(6-Carboxyuracil).html	Others
36	S2221	Apatinib	G11	G	11	384-L1700-03	493.58	811803-05-1	sulfate	VEGFR	Apatinib is an orally bioavailable, selective VEGFR2 inhibitor with IC50 of 1 nM.	S(=O)(O)(C)=O.C1=CN=C(C(=C1)C(NC2=CC=C(C=C2)C3(CCCC3)C#N)=O)NCC4=CC=NC=C4	44	http://www.selleckchem.com/products/Apatinib-YN968D1.html	Protein Tyrosine Kinase
36	S2346	Puerarin	G12	G	12	384-L1700-03	416.38	3681-99-0	free base	Others	Puerarin (Kakonein), an isoflavones found in the root of Radix puerariae, is a 5-HT2C receptor and benzodiazepine site antagonist.	C12=C(C(=C(C=C1)O)O[C@H]3[C@@H]([C@H]([C@@H]([C@H](O3)CO)O)O)O)OC=C(C2=O)C4=CC=C(C=C4)O	10	http://www.selleckchem.com/products/Puerarin(Kakonein).html	Others
44	S2231	Telatinib	G13	G	13	384-L1700-03	409.83	332012-40-5	free base	VEGFR,PDGFR,c-Kit	Telatinib is a potent inhibitor of VEGFR2/3, c-Kit and PDGFRβ with IC50 of 6 nM/4 nM, 1 nM and 15 nM, respectively. Phase 2.	N1=C(C2=C(C(=N1)OCC3=CC(=NC=C3)C(=O)NC)OC=C2)NC4=CC=C(C=C4)Cl	200	http://www.selleckchem.com/products/Telatinib-BAY-57-9352.html	Protein Tyrosine Kinase
44	S2357	Silibinin	G14	G	14	384-L1700-03	482.44	22888-70-6	free base	Others	Silibinin, the main flavonoid extracted from the milk thistle Silybum marianum, displays hepatoprotective properties in acute and chronic liver injury.	[C@H]1([C@H](OC2C(O1)=CC=C(C=2)[C@H]3[C@@H](O)C(C4C(O3)=CC(=CC=4O)O)=O)C5=CC=C(C(=C5)OC)O)CO	10	http://www.selleckchem.com/products/Silibinin(Silybin).html	Others
52	S2244	AR-42	G15	G	15	384-L1700-03	312.36	935881-37-1	free base	HDAC	AR-42 is an HDAC inhibitor with IC50 30 nM.	C1=CC=C(C=C1)[C@@H](C(NC2=CC=C(C=C2)C(NO)=O)=O)C(C)C	201	http://www.selleckchem.com/products/AR-42-HDAC-42.html	Epigenetics
52	S2367	Tetrahydropapaverine HCl	G16	G	16	384-L1700-03	379.88	1654280	hydrochloride	Others	Tetrahydropapaverine, one of the TIQs and an analogue of salsolinol and tetrahydropapaveroline, has been reported to have neurotoxic effects on dopamine neurons.	C1(=C(C=C2C(=C1)CCNC2CC3=CC=C(C(=C3)OC)OC)OC)OC.Cl	18	http://www.selleckchem.com/products/Tetrahydropapaverine-hydrochloride.html	Others
60	S2259	Aloe-emodin	G17	G	17	384-L1700-03	270.24	481-72-1	free base	Others	Aloe-emodin is an interferon-inducing agent with IC50 of about 1 μg/mL for JEV and of about 0.33 μg/mL for EV71.	C12=C(C=C(C=C1O)CO)C(C3=C(C2=O)C(=CC=C3)O)=O	10	http://www.selleckchem.com/products/Aloe-emodin.html	Others
60	S2376	Ammonium Glycyrrhizinate	G18	G	18	384-L1700-03	839.96	1407-03-0	glycyrrhizinate	Others	Ammonium Glycyrrhizinate is a unique product derived from Licorice root and has an extremely sweet taste.	[C@@]1(CC[C@]2([C@@](C1)(C3[C@@](CC2)([C@]4([C@](C(C=3)=O)([C@]5([C@@](CC4)(C([C@H](CC5)O[C@]6(O[C@@H]([C@H]([C@@H]([C@@H]6O[C@]7([C@@H]([C@H]([C@@H]([C@H](O7)C(=O)O)O)O)O)[H])O)O)C(O)=O)[H])(C)C)[H])C)[H])C)C)[H])C)(C)C(O)=O.N	200	http://www.selleckchem.com/products/Ammonium-Glycyrrhizinate(AMGZ).html	Others
68	S2267	Azomycin	G19	G	19	384-L1700-03	113.07	527-73-1	free base	Others	Azomycin is an antimicrobial antibiotic produced by a strain of Nocardia mesenterica.	O=[N+](C1=NC=CN1)[O-]	203	http://www.selleckchem.com/products/Azomycin(2-Nitroimidazole).html	Others
68	S2385	Hordenine	G20	G	20	384-L1700-03	165.23	539-15-1	free base	Others	Hordenine (N,N-dimethyl-4-hydroxyphenylethylamine) is a phenylethylamine alkaloid with antibacterial and antibiotic properties.	C1=C(C=CC(=C1)CCN(C)C)O	199	http://www.selleckchem.com/products/Hordenine.html	Others
76	S2281	Chrysin	G21	G	21	384-L1700-03	254.24	480-40-0	free base	Others	Chrysin is a naturally occurring flavone chemically extracted from the blue passion flower (Passiflora caerulea).	C1=C(C2=C(C=C1O)OC(=CC2=O)C3=CC=CC=C3)O	10	http://www.selleckchem.com/products/Chrysin.html	Others
76	S2394	Naringenin	G22	G	22	384-L1700-03	272.25	480-41-1	free base	P450 (e.g. CYP17)	Naringenin is a natural predominant flavanone derived from plant food, which is considered to have a bioactive effect on human health as antioxidant, free radical scavenger, anti-inflammatory, carbohydrate metabolism promoter, and immune system modulator.	C1(=CC(=C2C(=C1)O[C@@H](CC2=O)C3=CC=C(C=C3)O)O)O	10	http://www.selleckchem.com/products/Naringenin.html	Metabolism
4	S2413	Geniposidic acid	H03	H	03	384-L1700-03	374.34	27741-01-1	free base	Others	Geniposidic acid is an effective anticancer and radioprotection agent.	C1O[C@H]([C@]2([C@@](C=1C(=O)O)(CC=C2CO)[H])[H])O[C@@H]3O[C@@H]([C@H]([C@@H]([C@@H]3O)O)O)CO	42	http://www.selleckchem.com/products/geniposidic-acid.html	Others
4	S2551	Sulbactam sodium	H04	H	04	384-L1700-03	255.22	69388-84-7	sodium	Others	Sulbactam sodium (Unasyn) is an irreversible β-lactamase inhibitor.	C1(C[C@@]2(N1[C@](C(S2(=O)=O)(C)C)([H])C([O-])=O)[H])=O.[Na+]	11	http://www.selleckchem.com/products/sulbactam-sodium-unasyn.html	Others
12	S2439	Guanosine	H05	H	05	384-L1700-03	283.24	118-00-3	free base	Others	Guanosine is a purine nucleoside comprising guanine attached to a ribose (ribofuranose) ring via a &beta;-N9-glycosidic bond.	C12N([C@@H]3O[C@@H](CO)[C@H]([C@H]3O)O)C=NC=1C(NC(=N2)N)=O	10	http://www.selleckchem.com/products/guanosine.html	Others
12	S2561	Clomifene citrate	H06	H	06	384-L1700-03	598.08	50-41-9	citrate	Estrogen/progestogen Receptor	Clomifene citrate (Serophene) is a selective estrogen receptor modulator.	C1(=CC=CC(=C1)\C(=C(/C2=CC=CC=C2)C3=CC=C(C=C3)OCCN(CC)CC)Cl).OC(CC(CC(O)=O)(C(=O)O)O)=O	200	http://www.selleckchem.com/products/Clomifene-citrate-Serophene.html	Endocrinology & Hormones
20	S2453	Benserazide HCl	H07	H	07	384-L1700-03	293.7	14919-77-8	hydrochloride	Dopamine Receptor,Others	Benserazide HCl is a peripherally-acting aromatic L-amino acid decarboxylase (AAAD) or DOPA decarboxylase inhibitor.	C1(=C(C(=C(C=C1)CNNC(C(N)CO)=O)O)O)O.Cl	200	selleckchem.com/products/Benserazide-hydrochloride(Serazide).html	Others
20	S2576	Xylometazoline HCl	H08	H	08	384-L1700-03	280.84	1218-35-5	hydrochloride	Others	Xylometazoline is an α-adrenoceptor agonist commonly used as nasal decongestant, exhibits highest potency at α2B-adrenoceptor subtype with EC50 of 99 μM. Phase 4.	C1(=C(C=C(C(=C1C)CC2NCCN=2)C)C(C)(C)C).Cl	96	http://www.selleckchem.com/products/xylometazoline-hcl.html	Others
28	S2461	Domperidone	H09	H	09	384-L1700-03	425.91	57808-66-9	free base	Dopamine Receptor	Domperidone(Motilium) is a dopamine blocker and an antidopaminergic reagent.	C(CCN1CCC(CC1)N2C3=C(NC2=O)C=C(C=C3)Cl)N4C(NC5=C4C=CC=C5)=O	112	http://www.selleckchem.com/products/Domperidone(Motilium).html	Neuronal Signaling
28	S2589	Miglitol	H10	H	10	384-L1700-03	207.22	72432-03-2	free base	Others	Miglitol is an oral anti-diabetic drug.	[C@@H]1(CN([C@@H]([C@H]([C@H]1O)O)CO)CCO)O	14	http://www.selleckchem.com/products/miglitol-glyset.html	Others
36	S2476	Itraconazole	H11	H	11	384-L1700-03	705.65	84625-61-6	free base	Others	Itraconazole is a triazole antifungal agent.	C1=CC(=CC=C1N2CCN(CC2)C3=CC=C(C=C3)N4C(N(N=C4)C(CC)C)=O)OC[C@@H]5O[C@@](OC5)(CN6C=NC=N6)C7=CC=C(C=C7Cl)Cl	10	http://www.selleckchem.com/products/Itraconazole(Sporanox).html	Others
36	S2603	Tioxolone	H12	H	12	384-L1700-03	168.17	4991-65-5	free base	Carbonic Anhydrase	Tioxolone is a metalloenzyme carbonic anhydrase I inhibitor with a Ki of 91 nM.	C1(=CC=C2C(=C1)OC(S2)=O)O	202	http://www.selleckchem.com/products/tioxolone.html	Metabolism
44	S2487	Mycophenolic acid	H13	H	13	384-L1700-03	320.34	24280-93-1	free base	Others	Mycophenolic acid is an immunosuppressant agent used to prevent rejection in organ transplantation.	C12=C(C(=C(C(=C1O)C/C=C(\C)CCC(=O)O)OC)C)COC2=O	199	http://www.selleckchem.com/products/Mycophenolic-acid(Mycophenolate).html	Others
44	S2613	Clorsulon	H14	H	14	384-L1700-03	380.66	60200-06-8	free base	Others	Clorsulon is used in the treatment of Fasciola hepatica infections in calves and sheep.	C1(=C(C=C(C(=C1)N)S(N)(=O)=O)S(N)(=O)=O)C(Cl)=C(Cl)Cl	199	http://www.selleckchem.com/products/clorsulon.html	Others
52	S2497	Pancuronium dibromide	H15	H	15	384-L1700-03	732.67	15500-66-0	bromide	AChR	Pancuronium dibromide is a competitive acetylcholine antagonist with an IC50 of 5.5 ± 0.5 nM.	[C@H]1([C@H](C[C@]2([C@](C1)([C@]3([C@@](CC2)([C@]4([C@](CC3)([C@@H]([C@H](C4)[N+]5(CCCCC5)C)OC(C)=O)C)[H])[H])[H])C)[H])OC(C)=O)[N+]6(CCCCC6)C.[Br-].[Br-]	136	http://www.selleckchem.com/products/Pancuronium-bromide(Pavulon).html	Neuronal Signaling
52	S2623	Omecamtiv mecarbil (CK-1827452)	H16	H	16	384-L1700-03	401.43	873697-71-3	free base	ATPase	Omecamtivmecarbil (CK-1827452) is a specific cardiac myosinactivator and a clinical drug for left ventricular systolic heart failure. Phase 2.	C1(=NC=C(C=C1)NC(NC2=C(C(=CC=C2)CN3CCN(CC3)C(=O)OC)F)=O)C	199	http://www.selleckchem.com/products/Omecamtiv-mecarbil-CK-1827452.html	Transmembrane Transporters
60	S2508	Scopolamine HBr	H17	H	17	384-L1700-03	384.26	114-49-8	hydrobromide	AChR	Scopolamine hydrobromide is a competitive muscarinic acetylcholine receptor with an IC50 of 55.3 ± 4.3 nM.	O(C([C@@H](C1=CC=CC=C1)CO)=O)[C@H]2(C[C@]3([C@]4([C@]([C@](N3C)(C2)[H])([H])O4)[H])[H]).Br	200	http://www.selleckchem.com/products/Scopolamine-hydrobromide.html	Neuronal Signaling
60	S2632	BMS-378806	H18	H	18	384-L1700-03	406.43	357263-13-9	free base	gp120/CD4	BMS-378806 selectively inhibits the binding of HIV-1 gp120 to the CD4receptor with EC50 of 0.85-26.5 nM in virus.	C1=CNC2C(=C1OC)C(=CN=2)C(C(N3[C@@H](CN(CC3)C(=O)C4=CC=CC=C4)C)=O)=O	199	http://www.selleckchem.com/products/bms806.html	Others
68	S2521	Epinephrine Bitartrate	H19	H	19	384-L1700-03	333.29	51-42-3	bitartrate	Adrenergic Receptor	Epinephrine Bitartrate is alpha- and beta-adrenergic receptor stimulator.	C1(=C(C=CC(=C1)[C@@H](O)CNC)O)O.C([C@H](O)[C@@H](O)C(=O)O)(=O)O	201	http://www.selleckchem.com/products/Epinephrine-bitartrate-Adrenalinium.html	GPCR & G Protein
68	S2656	PF-04929113 (SNX-5422)	H20	H	20	384-L1700-03	521.53	908115-27-5	free base	HSP (e.g. HSP90)	PF-04929113 (SNX-5422) is a potent and selective HSP90 inhibitor with Kd of 41 nM and induces Her-2 degradation with IC50 of 37 nM. Phase 1/2.	N1(C2=C(C(=N1)C(F)(F)F)C(CC(C2)(C)C)=O)C3=CC=C(C(=C3)N[C@@H]4CC[C@H](CC4)OC(CN)=O)C(=O)N	199	http://www.selleckchem.com/products/pf-04929113.html	Cytoskeletal Signaling
76	S2531	Asaraldehyde	H21	H	21	384-L1700-03	196.2	4460-86-0	free base	COX	Asaraldehyde is a natural COX-2 inhibitor, exhibiting 17-fold selectivity over COX-1.	C1(=C(C=C(C(=C1)C=O)OC)OC)OC	198	http://www.selleckchem.com/products/Asaraldehyde-Asaronaldehyde.html	Neuronal Signaling
76	S2665	Ciprofibrate	H22	H	22	384-L1700-03	289.15	52214-84-3	free base	PPAR	Ciprofibrate is a peroxisome proliferator-activated receptor agonist.	C1=C(C=CC(=C1)OC(C(O)=O)(C)C)C2C(C2)(Cl)Cl	200	http://www.selleckchem.com/products/ciprofibrate.html	DNA Damage
5	S2168	PD128907 HCl	I03	I	03	384-L1700-03	285.77	112960-16-4	hydrochloride	Dopamine Receptor	PD 128907 HCl is a potent and selective dopamine D3 receptor agonist, with EC50 of 0.64 nM, exhibits 53-fold selectivity over dopamine D2 receptor.	C1(=CC=C2C(=C1)[C@@]3([C@](CO2)(N(CCO3)CCC)[H])[H])O	41	http://www.selleckchem.com/products/PD-128907.html	Neuronal Signaling
5	S2308	Hesperetin	I04	I	04	384-L1700-03	302.27	520-33-2	free base	Histamine Receptor,TGF-beta/Smad	Hesperetin is a bioflavonoid and, to be more specific, a flavanone.	C1(=CC(=C2C(=C1)O[C@@H](CC2=O)C3=CC=C(C(=C3)O)OC)O)O	10	http://www.selleckchem.com/products/Hesperetin.html	TGF-beta/Smad
13	S2181	MLN9708	I05	I	05	384-L1700-03	517.12	1201902-80-8	free base	Proteasome	MLN9708 immediately hydrolyzed to MLN2238, the biologically active form, on exposure to aqueous solutions or plasma. MLN2238 inhibits the chymotrypsin-like proteolytic (β5) site of the 20S proteasome with IC50/Ki of 3.4 nM/0.93 nM, less potent to β1 and little activity to β2. Phase 3.	C1=CC(=CC(=C1Cl)C(NCC(N[C@H](B2OC(CC(O2)=O)(C(=O)O)CC(=O)O)CC(C)C)=O)=O)Cl	199	http://www.selleckchem.com/products/MLN9708.html	Proteases
13	S2317	L-(+)-Rhamnose Monohydrate	I06	I	06	384-L1700-03	182.17	10030-85-0	monohydrate	Others	L(+)-Rhamnose (Rham) is a naturally-occurring deoxy sugar that is found primarily in plants and some bacteria.	[C@H]1([C@H]([C@H](C(O[C@@H]1C)O)O)O)O.O	10	http://www.selleckchem.com/products/L(+)-Rhamnose-Monohydrate.html	Others
21	S2195	CYT997 (Lexibulin)	I07	I	07	384-L1700-03	434.53	917111-44-5	Free Base	Microtubule Associat	CYT997 (Lexibulin) is a potent microtubule polymerization inhibitor with IC50 of 10-100 nM in cancer cell lines. Phase 2.	N1=CC(=C(N=C1C2=CC(=C(C=C2)NC(=O)NCC)OC)N[C@H](C3=CC=CN=C3)CCC)C	87	www.selleckchem.com/products/CYT997.html	Cytoskeletal Signaling
21	S2327	Myricitrin	I08	I	08	384-L1700-03	464.38	17912-87-7	free base	Others	Myricitrin, a flavonoid compound isolated from the root bark of Myrica cerifera, which exerts antinociceptive effects.	C1(=CC(=C2C(=C1)OC(=C(C2=O)O[C@@H]3O[C@H]([C@@H]([C@H]([C@@H]3O)O)O)C)C4=CC(=C(C(=C4)O)O)O)O)O	200	http://www.selleckchem.com/products/Myricitrin(Myricitrine).html	Others
29	S2214	AZ 960	I09	I	09	384-L1700-03	354.36	905586-69-8	free base	JAK	AZ 960 is a novel ATP competitive JAK2 inhibitor with IC50 and Ki of <3 nM and 0.45 nM, 3-fold selectivity of AZ960 for JAK2 over JAK3.	C1=C(C(=NC(=C1F)NC2C=C(NN=2)C)N[C@H](C3=CC=C(C=C3)F)C)C#N	200	http://www.selleckchem.com/products/AZ-960.html	JAK/STAT
29	S2337	Osthole	I10	I	10	384-L1700-03	244.29	484-12-8	free base	Others	Osthol is an O-methylated coumarin, which is found in the plants such as Cnidium monnieri, Angelica archangelica and Angelica pubescens.	C1(=CC=C2C(=C1CC=C(C)C)OC(C=C2)=O)OC	200	http://www.selleckchem.com/products/Osthole(Osthol).html	Others
37	S2224	UK 383367	I11	I	11	384-L1700-03	324.38	348622-88-8	free base	Procollagen C Proteinase	UK-383367 is a procollagen C-proteinase inhibitor with IC50 of 44 nM, has excellent selectivity over MMPs.	C1([C@H](CCCC2CCCCC2)CC(NO)=O)=NC(C(N)=O)=NO1	200	http://www.selleckchem.com/products/uk-383367.html	Metabolism
37	S2347	Quercetin Dihydrate	I12	I	12	384-L1700-03	338.27	6151-25-3	dihydrate	Others	Quercetin, a polyphenolic flavonoid found in a wide variety of plant-based foods, such as apples, onions, berries, and red wine, is utilized in many different cultures for their nervous system and anticancer effects.	C1(=CC(=C2C(=C1)OC(=C(C2=O)O)C3=CC=C(C(=C3)O)O)O)O.O.O	201	http://www.selleckchem.com/products/Quercetin-dihydrate(Sophoretin).html	Others
45	S2232	Ketanserin	I13	I	13	384-L1700-03	395.43	74050-98-9	free base	5-HT Receptor	Ketanserin (Vulketan Gel) is specific 5-HT2A serotonin receptor antagonist with a Ki of 2.5 nM for rat and human 5-HT2A.	C1=CC=C2C(=C1)C(N(C(N2)=O)CCN3CCC(CC3)C(C4=CC=C(C=C4)F)=O)=O	10	http://www.selleckchem.com/products/Ketanserin-Vulketan-Gel.html	Neuronal Signaling
45	S2358	Silymarin	I14	I	14	384-L1700-03	482.44	65666-07-1	free base	Others	Silymarin (Silybin B), a polyphenolic flavonoid extracted from the seeds of Silybum marianum or milk thistle, is used in the prevention and treatment of liver diseases and primary liver cancer.	C1(=CC(=CC=C1O)C2OC3C(OC2CO)=CC(=CC=3)C4C(O)C(C5=C(O4)C=C(C=C5O)O)=O)OC	201	http://www.selleckchem.com/products/Silymarin(Silybin-B).html	Others
53	S2247	BKM120 (NVP-BKM120, Buparlisib)	I15	I	15	384-L1700-03	410.39	944396-07-0	free base	PI3K	BKM120 is a selective PI3K inhibitor of p110α/β/δ/γ with IC50 of 52 nM/166 nM/116 nM/262 nM, respectively. Reduced potency against VPS34, mTOR, DNAPK, with little activity to PI4Kβ. Phase 1/2.	C1=C(N=CC(=C1C(F)(F)F)C2=NC(=NC(=C2)N3CCOCC3)N4CCOCC4)N	199	http://www.selleckchem.com/products/BKM-120.html	PI3K/Akt/mTOR
53	S2369	Troxerutin	I16	I	16	384-L1700-03	742.68	7085-55-4	free base	Others	Troxerutin (Trihydroxyethylrutin), a natural bioflavonoid isolated from Sophora japonica., has been reported to have many benefits and medicinal properties.	C1=C(C=C2C(=C1O)C(C(=C(O2)C3=CC(=C(C=C3)OCCO)OCCO)O[C@@H]4O[C@H]([C@H]([C@@H]([C@H]4O)O)O)CO[C@H]5[C@@H]([C@@H]([C@H]([C@@H](O5)C)O)O)O)=O)OCCO	10	http://www.selleckchem.com/products/Troxerutin.html	Others
61	S2260	Laetrile	I17	I	17	384-L1700-03	457.43	29883-15-6	free base	Others	Laetrile is a glycoside initially isolated from the seeds of the tree Prunus dulcis, also known as bitter almonds.	[C@H]1([C@H]([C@@H](O[C@@H]([C@@H]1O)CO)OC[C@@H]2[C@H]([C@@H]([C@H]([C@@H](O2)O[C@H](C3=CC=CC=C3)C#N)O)O)O)O)O	201	http://www.selleckchem.com/products/Amygdalin.html	Others
61	S2377	Biochanin A	I18	I	18	384-L1700-03	284.26	491-80-5	free base	Others	Biochanin A, an O-methylated isoflavone from Trifolium pratense, inhibits protein tyrosine kinase (PTK) of epidermal growth factor receptor with IC50 values of 91.5 &mu;M.	C1(=CC(=C2C(=C1)OC=C(C2=O)C3=CC=C(C=C3)OC)O)O	200	http://www.selleckchem.com/products/Biochanin-A(4-Methylgenistein).html	Others
69	S2268	Baicalein	I19	I	19	384-L1700-03	270.24	491-67-8	free base	P450 (e.g. CYP17)	Baicalein is a CYP2C9 and prolyl endopeptidase inhibitor.	C1(=C(C(=C2C(=C1)OC(=CC2=O)C3=CC=CC=C3)O)O)O	199	http://www.selleckchem.com/products/Baicalein.html	Metabolism
69	S2386	Indirubin	I20	I	20	384-L1700-03	262.26	479-41-4	free base	GSK-3	Indirubin is a potent cyclin-dependent kinases and GSK-3β inhibitor with IC50 of about 5 &mu;M and 0.6 &mu;M.	C1=CC=C2C(=C1)NC(C/2=C3\NC4=C(C3=O)C=CC=C4)=O	202	http://www.selleckchem.com/products/Indirubin.html	PI3K/Akt/mTOR
77	S2282	Cinchonidine	I21	I	21	384-L1700-03	294.39	485-71-2	free base	Others	Cinchonidine is an alkaloid used in asymmetric synthesis in organic chemistry.	C1=C2C(=CC=C1)N=CC=C2[C@H]([C@]3(N4CCC(C3)[C@](C4)(C=C)[H])[H])O	200	http://www.selleckchem.com/products/Cinchonidine.html	Others
77	S2395	Rheochrysidin	I22	I	22	384-L1700-03	284.26	521-61-9	free base	Others	Physcion is a anthraquinone from roots of Rheum officinale Baill.	C1(=CC(=C2C(=C1)C(C3=C(C2=O)C(=CC(=C3)OC)O)=O)O)C	21	http://www.selleckchem.com/products/Rheochrysidin-Physcione.html	Others
5	S2415	Astragaloside A	J03	J	03	384-L1700-03	784.97	83207-58-3	free base	TGF-beta/Smad	Astragaloside A (Astragaloside IV) is the primary pure saponin isolated from Astragalus membranaceus, which has been widely used for the treatment of cardiovascular diseases.	[C@@H]1([C@@H]([C@H]([C@@H](OC1)O[C@@H]2C([C@]3([C@]4(CC2)[C@@]5([C@@](C[C@@H]3O[C@@H]6O[C@@H]([C@H]([C@@H]([C@@H]6O)O)O)CO)([C@]7([C@](CC5)([C@@]([C@H](C7)O)([C@@]8(CC[C@@H](O8)C(C)(C)O)C)[H])C)C)[H])C4)[H])(C)C)O)O)O	10	http://www.selleckchem.com/products/astragaloside-a.html	TGF-beta/Smad
5	S2552	Azelastine HCl	J04	J	04	384-L1700-03	418.36	79307-93-0	hydrochloride	Histamine Receptor	Azelastine hydrochloride (Astelin) is a potent, second-generation, selective, histamine antagonist.	C1(=CC=C2C(=C1)C(N(N=C2CC3=CC=C(C=C3)Cl)C4CCN(CCC4)C)=O).Cl	200	http://www.selleckchem.com/products/Azelastine-hydrochloride-Astelin.html	Neuronal Signaling
13	S2442	Inosine	J05	J	05	384-L1700-03	268.23	58-63-9	free base	Others	Inosine is a nucleoside that is formed when hypoxanthine is attached to a ribose ring via a &beta;-N9-glycosidic bond.	O1[C@@H]([C@H]([C@H]([C@H]1N2C3=C(N=C2)C(NC=N3)=O)O)O)CO	10	http://www.selleckchem.com/products/inosine.html	Others
13	S2564	Cloxacillin Sodium	J06	J	06	384-L1700-03	475.88	7081-44-9	sodium	Others	Cloxacillin Sodium is a sodium salt of cloxacillin that is a penicillinase-resistant, acid resistant, semi-synthetic penicillin.	[C@H]1(C(N2[C@]1(SC([C@@H]2C(=O)[O-])(C)C)[H])=O)NC(=O)C3(=C(ON=C3C4=CC=CC=C4Cl)C).[Na+].O	115	http://www.selleckchem.com/products/Cloxacillin-sodium-Cloxacap.html	Others
21	S2454	Bupivacaine HCl	J07	J	07	384-L1700-03	324.89	18010-40-7	hydrochloride	cAMP	Bupivacaine hydrochloride(Marcain) is a more potent cAMP production inhibitor with an IC50 of 2.3 μM	C1(=CC=C(C(=C1C)NC(C2N(CCCC2)CCCC)=O)C).Cl	200	selleckchem.com/products/Bupivacaine-hydrochloride(Marcain).html	GPCR & G Protein
21	S2577	Phenacetin	J08	J	08	384-L1700-03	179.22	62-44-2	free base	COX	Phenacetin is a non-opioid analgesic without anti-inflammatory properties.	C1=C(C=CC(=C1)NC(C)=O)OCC	200	http://www.selleckchem.com/products/phenacetin.html	Neuronal Signaling
29	S2466	Estriol	J09	J	09	384-L1700-03	288.39	50-27-1	free base	Estrogen/progestogen Receptor	Estriol is an antagonist of the G-protein coupled estrogen receptor in estrogen receptor-negative breast cancer cells.	C1=C(C=C2C(=C1)[C@]3([C@@](CC2)([C@]4([C@](CC3)([C@@H]([C@@H](C4)O)O)C)[H])[H])[H])O	197	http://www.selleckchem.com/products/Estriol(Oestriol).html	Endocrinology & Hormones
29	S2590	Pioglitazone	J10	J	10	384-L1700-03	356.44	111025-46-8	free base	Others	Pioglitazone (Actos) is a selective peroxisome proliferator-activated receptor gamma stimulator.	C1(=CC=C(N=C1)CCOC2=CC=C(C=C2)CC3C(NC(S3)=O)=O)CC	42	http://www.selleckchem.com/products/pioglitazone-actos.html	Others
37	S2479	Lincomycin HCl	J11	J	11	384-L1700-03	443	859-18-7	hydrochloride	Others	Lincomycin hydrochloride(Lincocin) is the monohydrated salt of lincomycin, a substance produced by the growth of a member of the lincolnensis group of Streptomyces lincolnensis.	[C@@H]1([C@@H]([C@H]([C@H](O[C@]1([C@@H]([C@@H](C)O)NC(=O)[C@@H]2C[C@H](CN2C)CCC)[H])SC)O)O)O.Cl	200	http://www.selleckchem.com/products/Lincomycin-hydrochloride(Lincocin).html	Others
37	S2604	Dehydroepiandrosterone (DHEA)	J12	J	12	384-L1700-03	288.43	53-43-0	free base	Androgen Receptor	Dehydroepiandrosterone(DHEA) is a 19-carbon endogenous natural steroid hormone.Phase 3.	C1[C@@H](CC2[C@](C1)([C@]3([C@@](CC=2)([C@]4([C@](CC3)(C(CC4)=O)C)[H])[H])[H])C)O	10	http://www.selleckchem.com/products/Dehydroepiandrosterone(DHEA).html	Endocrinology & Hormones
45	S2489	Nateglinide	J13	J	13	384-L1700-03	317.42	105816-04-4	free base	Potassium Channel	Nateglinide is an insulin secretagog agent that lowers blood glucose levels by stimulating insulin secretion from the pancreas.	C1[C@H](CC[C@@H](C1)C(N[C@H](CC2=CC=CC=C2)C(=O)O)=O)C(C)C	198	http://www.selleckchem.com/products/Nateglinide(Starlix).html	Transmembrane Transporters
45	S2614	Arecoline	J14	J	14	384-L1700-03	236.11	300-08-3	HBr	AChR	Arecoline is a muscarinic acetylcholine receptor agonist.	N1(CCC=C(C1)C(OC)=O)C.Br	199	http://www.selleckchem.com/products/arecoline.html	Neuronal Signaling
53	S2498	D-Pantothenic acid	J15	J	15	384-L1700-03	219.24	79-83-4	free base	Others	D-Pantothenic acid is a water-soluble vitamin and an essential nutrient for for many animals.	OCC([C@](C(NCCC(O)=O)=O)(O)[H])(C)C	200	http://www.selleckchem.com/products/Pantothenic-acid(pantothenate).html	Others
53	S2624	OSI-027	J16	J	16	384-L1700-03	406.44	936890-98-1	free base	mTOR	OSI-027 is a selective and potent dual inhibitor of mTORC1 and mTORC2 with IC50 of 22 nM and 65 nM, and more than 100-fold selectivity observed for mTOR than PI3Kα, PI3Kβ, PI3Kγ or DNA-PK.	N1C=NN2C(C=1N)=C(N=C2[C@@H]3CC[C@H](CC3)C(=O)O)C4NC5=C(C=4)C=CC=C5OC	44	http://www.selleckchem.com/products/OSI027.html	PI3K/Akt/mTOR
61	S2509	Sotalol	J17	J	17	384-L1700-03	308.82	959-24-0	hydrochloride	Adrenergic Receptor	Sotalol (Betapace) is a non-selective beta blocker and a potassium channel blocker with an IC50 of 43 μM	C1(=CC=C(C=C1)NS(C)(=O)=O)C(CNC(C)C)O.Cl	200	http://www.selleckchem.com/products/Sotalol-hydrochloride(Betapace).html	Neuronal Signaling
61	S2633	NPS-2143	J18	J	18	384-L1700-03	408.92	284035-33-2	free base	CaSR	NPS 2143 is a novel potent and selective antagonist of Ca(2+) receptor with IC50 of 43 nM.	C1(=CC=CC(=C1C#N)OC[C@@H](CNC(CC2=CC=C3C(=C2)C=CC=C3)(C)C)O)Cl	200	http://www.selleckchem.com/products/nps-2143.html	GPCR & G Protein
69	S2522	L-Adrenaline	J19	J	19	384-L1700-03	183.2	51-43-4	free base	Adrenergic Receptor	L-Adrenaline belongs to a group of the compounds known as catecholamines.	C1(=C(C=CC(=C1)[C@@H](O)CNC)O)O	21	http://www.selleckchem.com/products/L-Adrenaline-Epinephrine.html	Neuronal Signaling
69	S2658	GSK2126458 (GSK458)	J20	J	20	384-L1700-03	505.5	1086062-66-9	free base	PI3K,mTOR	GSK2126458 is a highly selective and potent inhibitor of p110α/β/δ/γ, mTORC1/2 with Ki of 0.019 nM/0.13 nM/0.024 nM/0.06 nM and 0.18 nM/0.3 nM, respectively. Phase 1.	C1(C(=CC(=CC=1)F)F)S(=O)(=O)NC2C(=NC=C(C=2)C3C=C4C(=CC=NC(=CC=3)4)C5C=NN=CC=5)OC	197	http://www.selleckchem.com/products/gsk2126458.html	PI3K/Akt/mTOR
77	S2532	L-Ascorbyl 6-palmitate	J21	J	21	384-L1700-03	414.53	137-66-6	free base	Others	Ascorbyl palmitate is an ester formed from ascorbic acid and palmitic acid creating a fat-soluble form of vitamin C.	O1[C@@](C(=C(C1=O)O)O)([C@H](COC(CCCCCCCCCCCCCCC)=O)O)[H]	200	http://www.selleckchem.com/products/L-Ascorbyl-6-palmitate.html	Others
77	S2666	PF-3845	J22	J	22	384-L1700-03	456.46	1196109-52-0	free base	FAAH	PF-3845 is a potent, selective and irreversible FAAH inhibitor with Ki of 230 nM, showing negligible activity against FAAH2.	C1(=CN=C(C=C1)OC2=CC(=CC=C2)CC3CCN(CC3)C(NC4=CN=CC=C4)=O)C(F)(F)F	199	http://www.selleckchem.com/products/pf-3845.html	Metabolism
6	S2169	Rosuvastatin Calcium	K03	K	03	384-L1700-03	500.57	147098-20-2	free base	RAAS	Rosuvastatin Calcium is a competitive inhibitor of HMG-CoA reductase with IC50 of 11 nM.	[Ca+2].N1(=C(N=C(C(=C1C(C)C)C=C[C@@H](O)C[C@H](CC([O-])=O)O)C2=CC=C(C=C2)F)N(S(C)(=O)=O)C).N3=C(N=C(C(=C3C(C)C)C=C[C@@H](O)C[C@H](CC([O-])=O)O)C4=CC=C(C=C4)F)N(S(C)(=O)=O)C	199	http://www.selleckchem.com/products/Rosuvastatin-calcium(Crestor).html	Endocrinology & Hormones
6	S2309	Hesperidin	K04	K	04	384-L1700-03	610.56	520-26-3	free base	Others	Hesperidin is a flavanone glycoside found abundantly in citrus fruits.	[C@H]1([C@H]([C@@H]([C@H]([C@@H](O1)OC2=CC(=C3C(=C2)O[C@@H](CC3=O)C4=CC=C(C(=C4)O)OC)O)O)O)O)CO[C@H]5[C@H](O)[C@H]([C@H]([C@@H](O5)C)O)O	199	http://www.selleckchem.com/products/Hesperidin.html	Others
14	S2182	SB743921	K05	K	05	384-L1700-03	553.52	940929-33-9	hydrochloride	Kinesin	SB743921 is a kinesin spindle protein (KSP) inhibitor with Ki of 0.1 nM, almost no affinity to MKLP1, Kin2, Kif1A, Kif15, KHC, Kif4 and CENP-E. Phase 1/2.	C1(=CC(=CC=C1)CC2C(C3=C(OC=2[C@H](N(C(=O)C4=CC=C(C=C4)C)CCCN)C(C)C)C=C(C=C3)Cl)=O).Cl	200	http://www.selleckchem.com/products/SB-743921.html	Cytoskeletal Signaling
14	S2319	Limonin	K06	K	06	384-L1700-03	470.51	1180-71-8	free base	Others	Limonin is a triterpenoid enriched in citrus fruits, which has antivirus and antitumor ability.	C1(O[C@H]([C@]2([C@]3([C@H]1O3)[C@@]4([C@](CC2)([C@]56[C@@](CC4=O)(C(O[C@]5(CC(OC6)=O)[H])(C)C)[H])[H])C)C)C7=COC=C7)=O	93	http://www.selleckchem.com/products/Limonin.html	Others
22	S2198	SGI-1776 free base	K07	K	07	384-L1700-03	405.42	1025065-69-3	free base	Pim	SGI-1776 is a novel ATP competitive inhibitor of Pim1 with IC50 of 7 nM, 50- and 10-fold selective versus Pim2 and Pim3, also potent to Flt3 and haspin. Phase 1.	C1C(=NN2C(C=1)=NC=C2C3=CC=CC(=C3)OC(F)(F)F)NCC4CCN(CC4)C	199	http://www.selleckchem.com/products/SGI-1776.html	JAK/STAT
22	S2328	Nalidixic acid	K08	K	08	384-L1700-03	232.24	389-08-2	free base	Others	Nalidixic acid(NegGram) is a synthetic 1,8-naphthyridine antimicrobial agent with a limited bacteriocidal spectrum. It is an inhibitor of the A subunit of bacterial DNA gyrase.	C1=C(C(C2=C(N1CC)N=C(C=C2)C)=O)C(O)=O	25	http://www.selleckchem.com/products/Nalidixic-acid(NegGram).html	Others
30	S2215	DAPT (GSI-IX)	K09	K	09	384-L1700-03	432.46	208255-80-5	free base	Gamma-secretase,Beta Amyloid	DAPT (GSI-IX) is a novel γ-secretase inhibitor, which inhibits Aβ production with IC50 of 20 nM in HEK 293 cells.	C1(=CC(=CC(=C1)CC(=O)N[C@@H](C)C(N[C@H](C(=O)OC(C)(C)C)C2=CC=CC=C2)=O)F)F	198	http://www.selleckchem.com/products/DAPT-GSI-IX.html	Proteases
30	S2338	Oxymatrine	K10	K	10	384-L1700-03	264.36	16837-52-8	free base	Others	Oxymatrine is a quinolizidine alkaloid extracted from the root of Sophora flavescens, which is used for the treatment of viral hepatitis, cancer, viral myocarditis, gastrointestinal hemorrhage and skin diseases.	C1CC[N+]2([C@]3([C@]1(CN4[C@@]([C@](CCC2)3[H])(CCCC4=O)[H])[H])[H])[O-]	200	http://www.selleckchem.com/products/Oxymatrine(Matrine-N-oxide).html	Others
38	S2225	TAME	K11	K	11	384-L1700-03	342.41	901-47-3	free base	E3 Ligase ,APC	Tosyl-L-Arginine Methyl Ester (TAME) is an APC inhibitor.	C1=C(C=CC(=C1)S(N[C@H](C(OC)=O)CCCNC(=N)N)(=O)=O)C	201	http://www.selleckchem.com/products/TAME.html	Cell Cycle
38	S2349	Rutaecarpine	K12	K	12	384-L1700-03	287.32	84-26-4	free base	Others	Rutaecarpine is an indolopyridoquinazolinone alkaloid isolated from Evodia rutaecarpa and related herbs.	N12C(=NC3=C(C1=O)C=CC=C3)C4=C(CC2)C5=C(N4)C=CC=C5	83	http://www.selleckchem.com/products/Rutaecarpine(Rutecarpine).html	Others
46	S2233	Esomeprazole Sodium	K13	K	13	384-L1700-03	367.4	161796-78-7	free base	ATPase	Esomeprazole sodium (Nexium) is a sodium salt of esomeprazole that is a potent proton pump inhibitor with an IC50 of 0.076 mg/kg.	C1(=CC=C2C(=C1)N=C([N-]2)S(CC3=NC=C(C(=C3C)OC)C)=O)OC.[Na+]	201	http://www.selleckchem.com/products/Esomeprazole-sodium-Nexium-I.V..html	Transmembrane Transporters
46	S2359	Sinomenine	K14	K	14	384-L1700-03	329.39	115-53-7	free base	Others	Sinomenine, a pure alkaloid extracted from the chinese medical plant Sinomenium acutum, is used for the treatment of rheumatism and arthritis.	C1(=C(C2=C(C=C1)C[C@H]3[C@@]4([C@]2(CC(C(=C4)OC)=O)CCN3C)[H])O)OC	200	http://www.selleckchem.com/products/Sinomenine(Cucoline).html	Others
54	S2248	CX-4945 (Silmitasertib)	K15	K	15	384-L1700-03	349.77	1009820-21-6	free base	Others	CX-4945 is a potent and selective inhibitor of CK2 (casein kinase 2) with IC50 of 1 nM, less potent to Flt3, Pim1 and CDK1 (inactive in cell-based assay). Phase 1.	C1=NC=C2C(=C1)C(=NC3=C2C=CC(=C3)C(=O)O)NC4=CC(=CC=C4)Cl	45	http://www.selleckchem.com/products/cx-4945-silmitasertib.html	Others
54	S2370	Ursolic Acid	K16	K	16	384-L1700-03	456.7	77-52-1	free base	Others	Ursolic acid (Malol) is a pentacyclic triterpene acid, used in cosmetics.	C1[C@@H](C([C@]2([C@](C1)([C@]3([C@@](CC2)([C@]4(C(=CC3)[C@@]5(C(CC4)[C@@H](C[C@H]([C@H]5C)C)C(=O)O)[H])C)C)[H])C)[H])(C)C)O	199	http://www.selleckchem.com/products/Ursolic-acid(Malol).html	Others
62	S2261	Andrographolide	K17	K	17	384-L1700-03	350.45	5508-58-7	free base	Others	Andrographolide is a labdane diterpenoid that is the main bioactive component of the medicinal plant Andrographis paniculata.	[C@@H]1([C@]([C@@]2([C@@](CC1)([C@H](C(CC2)=C)C/C=C3/C(OCC3O)=O)C)[H])(CO)C)O	199	http://www.selleckchem.com/products/Andrographolide.html	Others
62	S2378	Butylscopolamine Bromide	K18	K	18	384-L1700-03	440.37	149-64-4	bromide	Others	Butylscopolamine bromide, is a peripherally acting antimuscarinic, anticholinergic agent used as an abdominal-specific antispasmodic.	[Br-].C1=C(C=CC=C1)[C@@H](C(O[C@H]2C[C@]3([C@]4([C@@]([C@]([N+]3(CCCC)C)(C2)[H])(O4)[H])[H])[H])=O)CO	199	http://www.selleckchem.com/products/Butylscopolamine-bromide(Scopolamine-butylbromide).html	Others
70	S2269	Baicalin	K19	K	19	384-L1700-03	446.36	21967-41-9	free base	Others	Baicalin is a known prolyl endopeptidase inhibitor and affects the GABA receptors.	[C@@H]1([C@@H]([C@H]([C@H](O[C@H]1C(=O)O)OC2=C(O)C(=C3C(=C2)OC(=CC3=O)C4=CC=CC=C4)O)O)O)O	199	http://www.selleckchem.com/products/Baicalin.html	Others
70	S2387	Lappaconite HBr	K20	K	20	384-L1700-03	665.61	97792-45-5	hydrobromide	Others	Lappaconite Hydrobromide is a kind of alkaloid extracted from Aconitum sinomontanum Nakai and has anti-inflammatory effects.	C1(C[C@@]2([C@@]3([C@@]4([C@@H]1OC)[C@@]5([C@]6([C@@]([C@H](C3)C4N(C2)CC)(C[C@@H]([C@]([C@@H]6OC)(C5)[H])OC)O)O)[H])[H])OC(C7=C(C=CC=C7)NC(=O)C)=O).Br	42	http://www.selleckchem.com/products/Lappaconite-Hydrobromide.html	Others
78	S2285	Cryptotanshinone	K21	K	21	384-L1700-03	296.36	35825-57-1	free base	STAT	Cryptotanshinone (CPT) is a STAT3 inhibitor with IC50 of 4.6 μM, strongly inhibits phosphorylation of STAT3 Tyr705, with a small effect on STAT3 Ser727, but none against STAT1 nor STAT5.	C1CC(C2C(C1)=C3C(=CC=2)C4=C(C(C3=O)=O)[C@@H](CO4)C)(C)C	40	http://www.selleckchem.com/products/Cryptotanshinone.html	JAK/STAT
78	S2396	Salidroside	K22	K	22	384-L1700-03	300.3	10338-51-9	free base	Others	Salidroside, a phenylpropanoid glycoside isolated from Rhodiola rosea, has been reported to have a broad spectrum of pharmacological properties.	[C@H]1([C@H]([C@@H]([C@H]([C@@H](O1)OCCC2=CC=C(C=C2)O)O)O)O)CO	10	http://www.selleckchem.com/products/Salidroside-Rhodioloside.html	Others
6	S2417	20-Hydroxyecdysone	L03	L	03	384-L1700-03	480.63	5289-74-7	free base	Others	20-Hydroxyecdysone (Ecdysterone, 20E) is a naturally occurring ecdysteroid hormone which controls the ecdysis (moulting) and metamorphosis of arthropods.	[C@H]1([C@@H](C[C@@]2([C@](C1)([C@]3(C(=CC2=O)[C@]4([C@](CC3)([C@@H](CC4)[C@@]([C@@H](CCC(C)(O)C)O)(C)O)C)O)[H])C)[H])O)O	199	http://www.selleckchem.com/products/20-hydroxyecdysone.html	Others
6	S2553	5-Aminolevulinic acid HCl	L04	L	04	384-L1700-03	167.59	5451-09-2	hydrochloride	Others	5-Aminolevulinic acid is an intermediate in heme biosynthesis in the body and the universal precursor of tetrapyrroles.	NCC(CCC(O)=O)=O.Cl	202	http://www.selleckchem.com/products/5-Aminolevulinic-acid-hydrochloride.html	Others
14	S2443	Tolbutamide	L05	L	05	384-L1700-03	270.35	64-77-7	free base	Potassium Channel	Tolbutamide is an inhibitor of cAMP with IC50 of 4 mM.	C1(C=CC(=CC=1)C)S(=O)(=O)NC(=O)NCCCC	10	http://www.selleckchem.com/products/tolbutamide.html	Transmembrane Transporters
14	S2565	Amoxicillin Sodium	L06	L	06	384-L1700-03	387.39	34642-77-8	sodium	Others	Amoxicillin Sodium is a moderate- spectrum, bacteriolytic, β-lactam antibiotic.	C1(=CC=C(C=C1)[C@H](C(N[C@H]2[C@@]3(N(C2=O)[C@@H](C(S3)(C)C)C(=O)[O-])[H])=O)N)O.[Na+]	201	http://www.selleckchem.com/products/amoxicillin-(amox).html	Others
22	S2455	Bethanechol chloride	L07	L	07	384-L1700-03	196.68	590-63-6	chloride	AChR	Bethanechol chloride is a selective muscarinic receptor agonist without any effect on nicotinic receptors.	[N+](CC(OC(N)=O)C)(C)(C)C.[Cl-]	198	selleckchem.com/products/Carbamyl-beta-methylcholine-chloride(Bethanechol-chloride).html	Neuronal Signaling
22	S2579	Zidovudine	L08	L	08	384-L1700-03	267.24	30516-87-1	free base	Reverse Transcriptase	Zidovudine (Retrovir) is a reverse transcriptase inhibitor.	N1C(N(C=C(C1=O)C)[C@@H]2O[C@@H]([C@H](C2)N=[N+]=[N-])CO)=O	10	http://www.selleckchem.com/products/zidovudine-retrovir.html	Microbiology
30	S2467	Famciclovir	L09	L	09	384-L1700-03	321.339	104227-87-4	free base	Others	Famciclovir(Famvir) is a guanine analogue antiviral drug used for the treatment of various herpesvirus infections.	N1=C(N=C2C(=C1)N=CN2CCC(COC(=O)C)COC(C)=O)N	199	http://www.selleckchem.com/products/Famciclovir(Famvir).html	Others
30	S2593	Tolvaptan	L10	L	10	384-L1700-03	448.94	150683-30-0	free base	Vasopressin Receptor	Tolvaptan is a selective, competitive arginine vasopressin receptor 2 antagonist with an IC50 of 1.28μM for the inhibition of AVP-induced platelet aggregation.	C(C1=C(C=C(C=C1)NC(=O)C2=CC=CC=C2C)C)(=O)N3CCCC(C4=C3C=CC(=C4)Cl)O	200	http://www.selleckchem.com/products/tolvaptan-opc-41061.html	GPCR & G Protein
38	S2480	Loperamide HCl	L11	L	11	384-L1700-03	513.5	34552-83-5	hydrochloride	Opioid Receptor,Autophagy	Loperamide HCl is an opioid-receptor agonist with an ED50 of 0.15 mg/kg.	C1(=C(C=CC(=C1)C2(CCN(CC2)CCC(C(=O)N(C)C)(C3=CC=CC=C3)C4=CC=CC=C4)O)Cl).Cl	42	http://www.selleckchem.com/products/Loperamide-hydrochloride.html	Neuronal Signaling
38	S2605	Idebenone	L12	L	12	384-L1700-03	338.44	58186-27-9	free base	Others	Idebenone is a synthetic analog of coenzyme Q10 (CoQ10) and a brain stimulant.	C1(C(=C(C(C(=C1C)CCCCCCCCCCO)=O)OC)OC)=O	200	http://www.selleckchem.com/products/idebenone.html	Others
46	S2491	Nitrendipine	L13	L	13	384-L1700-03	360.37	39562-70-4	free base	Calcium Channel,Autophagy	Nitrendipine is a dihydropyridine calcium channel blocker with an IC50 of 95 nM.	C1=CC(=CC(=C1)[N+]([O-])=O)C2C(=C(NC(=C2C(=O)OC)C)C)C(=O)OCC	199	http://www.selleckchem.com/products/Nitrendipine.html	Transmembrane Transporters
46	S2615	Noradrenaline bitartrate monohydrate	L14	L	14	384-L1700-03	337.28	108341-18-0	monohydrate	Others	Noradrenaline bitartrate monohydrate is a direct alpha-adrenergic receptors stimulator.	C1(=C(C=CC(=C1)[C@](CN)(O)[H])O)O.OC([C@@]([C@](C(O)=O)(O)[H])(O)[H])=O.O	189	http://www.selleckchem.com/products/noradrenaline-bitartrate-monohydrate-levophed.html	Others
54	S2499	Phenoxybenzamine HCl	L15	L	15	384-L1700-03	340.3	63-92-3	hydrochloride	Adrenergic Receptor	Phenoxybenzamine HCl is a non-specific, irreversible alpha antagonist with an IC50 of 550 nM.	C1(=CC=C(C=C1)OCC(N(CCCl)CC2=CC=CC=C2)C).Cl	199	http://www.selleckchem.com/products/Phenoxybenzamine-hydrochloride.html	GPCR & G Protein
54	S2625	Fostamatinib (R788)	L16	L	16	384-L1700-03	580.46	901119-35-5	free base	Syk	Fostamatinib (R788), a prodrug of the active metabolite R406, is a Syk inhibitor with IC50 of 41 nM, strongly inhibits Syk but not Lyn, 5-fold less potent to Flt3. Phase 2.	C1(=C(C(=CC(=C1)NC2=NC=C(C(=N2)NC3=CC=C4C(=N3)N(C(C(O4)(C)C)=O)COP(O)(O)=O)F)OC)OC)OC	199	http://www.selleckchem.com/products/R7935788-Fostamatinib.html	Angiogenesis
62	S2510	Spectinomycin HCl	L17	L	17	384-L1700-03	405.27	21736-83-4	hydrochloride	Others	Spectinomycin HCl is a new parenteral antibiotic prepared from Streptomyces spectabilis.	[C@H]1([C@@H]([C@@H]([C@@]2([C@@]([C@@H]1O)(O[C@]3([C@@](O2)(C(C[C@H](O3)C)=O)O)[H])[H])[H])NC)O)NC.Cl.Cl	244	www.selleckchem.com/products/Spectinomycin--hydrochloride.html	Others
62	S2634	DCC-2036 (Rebastinib)	L18	L	18	384-L1700-03	553.59	1020172-07-9	free base	Bcr-Abl	DCC-2036 is a conformational control Bcr-Abl inhibitor for Abl1(WT) and Abl1(T315I) with IC50 of 0.8 nM and 4 nM, also inhibits SRC, LYN, FGR, HCK, KDR, FLT3, and Tie-2, and low activity to seen towards c-Kit. Phase 1/2.	C1(=C(C=C(C=C1)OC2=CC(=NC=C2)C(NC)=O)F)NC(NC3N(N=C(C=3)C(C)(C)C)C4=CC5=C(C=C4)N=CC=C5)=O	200	http://www.selleckchem.com/products/dcc-2036.html	Angiogenesis
70	S2524	Phenytoin sodium	L19	L	19	384-L1700-03	274.25	630-93-3	sodium	Sodium Channel	Phenytoin sodium is an inactive voltage-gated sodium channel stabilizer.	N1(C(C(N=C1[O-])=O)(C2=CC=CC=C2)C3=CC=CC=C3).[Na+]	116	http://www.selleckchem.com/products/Phenytoin-sodium-Dilantin.html	Transmembrane Transporters
70	S2659	5-hydroxymethyl Tolterodine (PNU 200577, 5-HMT, 5-HM)	L20	L	20	384-L1700-03	341.49	207679-81-0	free base	AChR	5-hydroxymethyl tolterodine (PNU 200577) is a new muscarinic receptor antagonist with Kb of 0.84 nM.	C1=CC=CC=C1[C@H](C2=C(C=CC(=C2)CO)O)CCN(C(C)C)C(C)C	199	http://www.selleckchem.com/products/5-hydroxymethyl-tolterodine-pnu-200577.html	Neuronal Signaling
78	S2533	Ritodrine HCl	L21	L	21	384-L1700-03	323.81	23239-51-2	hydrochloride	Adrenergic Receptor	Ritodrine hydrochloride (DU 21220; Miolene; NSC 291565; Pre-Par) is a hydrochloride salt of ritodrine which is a β-2 adrenergic receptor agonist.	C1(=C(C=CC(=C1)[C@]([C@@](NCCC2=CC=C(C=C2)O)([H])C)([H])O)O).Cl	200	www.selleckchem.com/products/Ritodrine-hydrochloride-Yutopar.html	Neuronal Signaling
78	S2667	Dolutegravir (GSK1349572)	L22	L	22	384-L1700-03	419.38	1051375-16-6	free base	Integrase	S/GSK1349572 (GSK1349572) is a two-metal-binding HIV integrase inhibitor with IC50 of 2.7 nM, modest activity against raltegravir-resistant signature mutants Y143R, Q148K, N155H, and G140S/Q148H. Phase 3.	C1(=CC(=C(C=C1)CNC(C2=CN3C(=C(C2=O)O)C(N4[C@](C3)(OCC[C@@H]4C)[H])=O)=O)F)F	200	http://www.selleckchem.com/products/s-gsk1349572.html	Microbiology
7	S2170	Givinostat (ITF2357)	M03	M	03	384-L1700-03	475.97	732302-99-7	chloride	HDAC	Givinostat (ITF2357) is a potent HDAC inhibitor for HDAC2, HDAC1B and HDAC1A with IC50 of 10 nM, 7.5 nM and 16 nM. Phase 1/2.	C1(=CC2=C(C=C1CN(CC)CC)C=CC(=C2)COC(NC3=CC=C(C=C3)C(NO)=O)=O).O.Cl	199	http://www.selleckchem.com/products/ITF2357(Givinostat).html	Cytoskeletal Signaling
7	S2310	Honokiol	M04	M	04	384-L1700-03	266.334	35354-74-6	free base	MEK,Akt	Honokiol is the active principle of magnolia extract that inhibits Akt-phosphorylation and promotes ERK1/2phosphorylation. Phase 3.	C1(=C(C=C(C=C1)C2=CC(=CC=C2O)CC=C)CC=C)O	198	http://www.selleckchem.com/products/Honokiol.html	PI3K/Akt/mTOR
15	S2185	AST-1306	M05	M	05	384-L1700-03	621.08	1050500-29-2	mesylate	EGFR	AST-1306 is a novel irreversible inhibitor of EGFR and ErbB2 with IC50 of 0.5 nM and 3 nM, also effective in mutation EGFR T790M/L858R, more potent to ErbB2-overexpressing cells, 3000-fold selective for ErbB family than other kinases,	C(C=C)(=O)NC1(=CC2=C(N=CN=C(C=C1)2)NC3C=C(C(=CC=3)OCC4C=C(C=CC=4)F)Cl).C5=CC(=CC=C5S(O)(=O)=O)C	199	http://www.selleckchem.com/products/ast-1306.html	Protein Tyrosine Kinase
15	S2320	Luteolin	M06	M	06	384-L1700-03	286.24	491-70-3	free base	PDE	Luteolin is a flavonoid found in Terminalia chebula, which is a non-selective phisphodiesterase PDE inhibitor for PDE1-5 with Ki of 15.0 &mu;M, 6.4 &mu;M, 13.9 &mu;M, 11.1 &mu;M and 9.5 &mu;M, respectively.	C1(=CC(=C2C(=C1)OC(=CC2=O)C3=CC=C(C(=C3)O)O)O)O	199	http://www.selleckchem.com/products/Luteolin(Luteolol).html	Metabolism
23	S2199	Aliskiren Hemifumarate	M07	M	07	384-L1700-03	609.83	173334-58-2	fumarate	RAAS	Aliskiren hemifumarate is a direct renin inhibitor with IC50 of 1.5 nM.	C(/C=C/C(O)=O)(O)=O.C1(=C(C=C(C=C1)C[C@@H](C[C@@H]([C@H](C[C@H](C(NCC(C(N)=O)(C)C)=O)C(C)C)O)N)C(C)C)OCCCOC)OC.C2(=C(C=C(C=C2)C[C@@H](C[C@@H]([C@H](C[C@H](C(NCC(C(N)=O)(C)C)=O)C(C)C)O)N)C(C)C)OCCCOC)OC	163	http://www.selleckchem.com/products/Aliskiren-hemifumarate.html	Endocrinology & Hormones
23	S2329	Naringin	M08	M	08	384-L1700-03	580.53	10236-47-2	free base	Others	Naringin is a flavanone glycoside, which exerts a variety of pharmacological effects such as antioxidant activity, blood lipid lowering, anticancer activity, and inhibition of cytochrome P450 enzymes.	C1=C(C=C2C(=C1O)C(C[C@H](O2)C3=CC=C(C=C3)O)=O)O[C@@H]4O[C@@H]([C@H]([C@@H]([C@@H]4O[C@@H]5O[C@H]([C@@H]([C@H]([C@@H]5O)O)O)C)O)O)CO	199	http://www.selleckchem.com/products/Naringin(Naringoside).html	PI3K/Akt/mTOR
31	S2216	Mubritinib (TAK 165)	M09	M	09	384-L1700-03	468.47	366017-09-6	free base	HER2	Mubritinib (TAK-165) is a potent inhibitor of HER2/ErbB2 with IC50 of 6 nM; no activity to EGFR, FGFR, PDGFR, JAK1, Src and Blk.	C1=C(C=CC(=C1)/C=C/C2OC=C(N=2)COC3=CC=C(C=C3)CCCCN4N=NC=C4)C(F)(F)F	27	http://www.selleckchem.com/products/Mubritinib-TAK-165.html	Protein Tyrosine Kinase
31	S2339	Paeonol	M10	M	10	384-L1700-03	166.17	552-41-0	free base	Others	Paeonol (Peonol), a phenolic compound extracted from Chinese herbs Paeonia suffruticosa (moutan cortex) and Cynanchum paniculatum, inhibits MAO with an IC50 of about 50 &mu;M.	C1(=C(C=C(C=C1)OC)O)C(=O)C	198	http://www.selleckchem.com/products/Paeonol(Peonol).html	Others
39	S2226	CAL-101 (Idelalisib, GS-1101)	M11	M	11	384-L1700-03	415.42	870281-82-6	free base	PI3K	CAL-101 (Idelalisib, GS-1101) is a selective p110δ inhibitor with IC50 of 2.5 nM; shown to have 40- to 300-fold greater selectivity for p110δ thanp110α/β/γ, and 400- to 4000-fold more selectivity to p110δ than C2β, hVPS34, DNA-PK and mTOR. Phase 3.	C1=CC=C2C(=C1F)C(N(C(=N2)[C@@H](NC3=C4C(=NC=N3)NC=N4)CC)C5=CC=CC=C5)=O	199	http://www.selleckchem.com/products/CAL-101.html	PI3K/Akt/mTOR
39	S2350	Rutin	M12	M	12	384-L1700-03	610.52	153-18-4	free base	Others	Rutin, a flavonol glycoside found in many plants including buckwheat; tobacco; forsythia; hydrangea; viola, etc., which possesses healthy effects for human.	C1(=C(C(C2=C(O1)C=C(C=C2O)O)=O)O[C@@H]3O[C@@H]([C@H]([C@@H]([C@@H]3O)O)O)CO[C@@H]4O[C@H]([C@@H]([C@H]([C@@H]4O)O)O)C)C5=CC(=C(C=C5)O)O	199	http://www.selleckchem.com/products/Rutin(Rutoside).html	Others
47	S2235	Volasertib (BI 6727)	M13	M	13	384-L1700-03	618.81	755038-65-4	free base	PLK	BI6727 (Volasertib) is a highly potent Plk1 inhibitor with IC50 of 0.87 nM. It shows 6- and 65-fold greater selectivity against Plk2 and Plk3. Phase 2.	[C@H]1(C(N(C2=C(N1C(C)C)N=C(N=C2)NC3=CC=C(C=C3OC)C(N[C@@H]4CC[C@H](CC4)N5CCN(CC5)CC6CC6)=O)C)=O)CC	80	http://www.selleckchem.com/products/BI6727-Volasertib.html	Cell Cycle
[truncated: 1,029 more rows]
